# Supplementary material for: Hypoxia triggers collective aerotactic migration in Dictyostelium discoideum
Source: eLife. 2021 Aug 20;10:e64731. doi: 10.7554/eLife.64731 (PMC8378850; doi:10.7554/eLife.64731)
Supplement: Figure 1—figure supplement 2—source data 1. [file elife-64731-fig1-figsupp2-data1.xlsx]

## Sheet: Feuil1
# of cells	Time (min)
1000	92.6	19.1632
2000	34.5	4.9498
4000	38	3.1622
8000	26.2	4.1722
