# Supplementary material for: Hypoxia triggers collective aerotactic migration in Dictyostelium discoideum
Source: eLife. 2021 Aug 20;10:e64731. doi: 10.7554/eLife.64731 (PMC8378850; doi:10.7554/eLife.64731)
Supplement: Figure 2—figure supplement 1—source data 1. [file elife-64731-fig2-figsupp1-data1.xlsx]

## Sheet: Figure 2 figure supplement 1E
Figure 2 figure supplement 1E			O2 measurements robustness stress analysis
Position relative to median axis (um)	O2 (%) (optimum calculation)	O2(%) Bg:+10%	O2(%) Bg:-10%	O2(%) Io:x1.75	O2(%) I(21):+2%	O2(%) I(21):-2%
-4517.5	11.531	10.8185	12.1486	11.5673	12.0931	10.9695
-4491.5	11.4363	10.7265	12.0526	11.473	11.9912	10.8819
-4465.5	11.3135	10.605	11.9299	11.3507	11.8609	10.7666
-4439.5	11.2483	10.547	11.8598	11.2859	11.7872	10.71
-4413.5	11.0779	10.3766	11.6906	11.116	11.6079	10.5482
-4387.5	10.7559	10.0481	11.3761	10.7952	11.2748	10.2374
-4361.5	10.4149	9.70166	11.0418	10.4555	10.9217	9.9086
-4335.5	10.0801	9.36627	10.7096	10.122	10.5725	9.58802
-4309.5	9.83846	9.12655	10.4681	9.88135	10.3197	9.35765
-4283.5	9.59872	8.88632	10.2303	9.6424	10.0707	9.12719
-4257.5	9.39158	8.6828	10.0215	9.43613	9.85334	8.93021
-4231.5	9.17239	8.46607	9.80168	9.21775	9.62455	8.72062
-4205.5	8.96669	8.26248	9.59546	9.01272	9.41025	8.52351
-4179.5	8.75931	8.05739	9.38735	8.80609	9.19438	8.32461
-4153.5	8.52817	7.82919	9.15504	8.57587	8.95389	8.10282
-4127.5	8.31773	7.62219	8.94288	8.36632	8.73479	7.90104
-4101.5	8.09863	7.40764	8.72112	8.14811	8.5064	7.69122
-4075.5	7.89815	7.2123	8.51738	7.94834	8.29712	7.49953
-4049.5	7.71231	7.03454	8.32575	7.76317	8.10155	7.32342
-4023.5	7.52855	6.85898	8.136	7.58017	7.90829	7.14915
-3997.5	7.32989	6.66569	7.9337	7.38231	7.70149	6.95862
-3971.5	7.08743	6.42441	7.69118	7.14055	7.45218	6.72302
-3945.5	6.85634	6.19771	7.45728	6.91025	7.21309	6.49992
-3919.5	6.68437	6.03311	7.27974	6.73911	7.03325	6.3358
-3893.5	6.48017	5.83568	7.07056	6.53562	6.82091	6.13975
-3867.5	6.27237	5.6349	6.8575	6.32843	6.60496	5.94009
-3841.5	6.08419	5.45607	6.66199	6.14101	6.40812	5.76057
-3815.5	5.88772	5.26883	6.45824	5.94522	6.20307	5.57267
-3789.5	5.69604	5.08647	6.25913	5.75415	6.00305	5.38931
-3763.5	5.52575	4.92615	6.08075	5.58456	5.82473	5.22705
-3737.5	5.35621	4.76737	5.90237	5.41574	5.64695	5.06575
-3711.5	5.16169	4.58214	5.70028	5.22166	5.44457	4.87908
-3685.5	5.00805	4.43958	5.53737	5.06875	5.28314	4.73322
-3659.5	4.82916	4.27123	5.34968	4.89038	5.09641	4.56217
-3633.5	4.6727	4.12563	5.18403	4.7345	4.93248	4.41317
-3607.5	4.50248	3.96665	5.00426	4.5648	4.75453	4.25067
-3581.5	4.33426	3.80988	4.82627	4.39712	4.57867	4.0901
-3555.5	4.18212	3.66926	4.66418	4.24567	4.41921	3.94526
-3529.5	4.02589	3.52489	4.49768	4.09008	4.25559	3.79642
-3503.5	3.86542	3.37615	4.32698	3.93014	4.08783	3.64323
-3477.5	3.70188	3.2249	4.15269	3.76705	3.91685	3.48713
-3451.5	3.54829	3.08412	3.9878	3.61398	3.75583	3.34096
-3425.5	3.40953	2.959	3.83692	3.47593	3.60958	3.20969
-3399.5	3.25662	2.81977	3.67181	3.32334	3.44909	3.06435
-3373.5	3.10579	2.68246	3.50886	3.17289	3.29089	2.92088
-3347.5	2.97085	2.56136	3.36145	3.0385	3.14872	2.79316
-3321.5	2.82991	2.43451	3.20775	2.8983	3.0005	2.65951
-3295.5	2.67581	2.29449	3.04086	2.74455	2.83908	2.51272
-3269.5	2.51505	2.14867	2.86644	2.58411	2.67068	2.35958
-3243.5	2.3589	2.00966	2.69455	2.42839	2.50616	2.2118
-3217.5	2.21582	1.88624	2.53331	2.28593	2.3539	2.07789
-3191.5	2.08174	1.77207	2.38073	2.15241	2.2107	1.95292
-3165.5	1.96732	1.67577	2.24939	2.03878	2.08814	1.84663
-3139.5	1.84272	1.56566	2.11122	1.91438	1.95688	1.72869
-3113.5	1.72441	1.45945	1.98154	1.79623	1.83298	1.61596
-3087.5	1.62056	1.36619	1.8677	1.69244	1.72428	1.51695
-3061.5	1.53528	1.29153	1.77236	1.60757	1.63429	1.43637
-3035.5	1.45375	1.22169	1.67976	1.52633	1.54768	1.35992
-3009.5	1.37666	1.15711	1.59078	1.44967	1.46525	1.28818
-2983.5	1.31007	1.10325	1.51205	1.38365	1.3933	1.22694
-2957.5	1.23945	1.04458	1.43	1.31294	1.31763	1.16136
-2931.5	1.20546	1.02235	1.38473	1.27973	1.27885	1.13214
-2905.5	1.17708	1.00483	1.34594	1.25177	1.24607	1.10816
-2879.5	1.14079	0.977955	1.30057	1.21553	1.20591	1.07572
-2853.5	1.09995	0.945362	1.25179	1.1754	1.1617	1.03828
-2827.5	1.04326	0.895729	1.18825	1.11887	1.10203	0.984542
-2801.5	0.988374	0.847522	1.1269	1.06417	1.04435	0.932452
-2775.5	0.933412	0.799129	1.06557	1.0094	0.98665	0.880227
-2749.5	0.872056	0.744143	0.998025	0.947987	0.922627	0.821537
-2723.5	0.815388	0.693565	0.935431	0.891237	0.863427	0.767398
-2697.5	0.767909	0.651811	0.882376	0.843848	0.813595	0.72227
-2671.5	0.731658	0.620873	0.840945	0.807821	0.775188	0.688173
-2645.5	0.696865	0.591044	0.801307	0.773083	0.738382	0.65539
-2619.5	0.666314	0.565147	0.76621	0.742724	0.705956	0.626713
-2593.5	0.635816	0.539089	0.731372	0.71235	0.673671	0.598001
-2567.5	0.608497	0.515951	0.699959	0.68525	0.644674	0.572357
-2541.5	0.582605	0.493965	0.670242	0.659499	0.617219	0.548027
-2515.5	0.556387	0.471431	0.640412	0.633096	0.589524	0.523285
-2489.5	0.535862	0.454346	0.616513	0.612843	0.567632	0.504125
-2463.5	0.514462	0.436187	0.591931	0.591547	0.544942	0.484014
-2437.5	0.49737	0.42204	0.571946	0.574725	0.526684	0.468086
-2411.5	0.490806	0.417951	0.562955	0.568081	0.519152	0.46249
-2385.5	0.497842	0.427022	0.567996	0.575512	0.525411	0.470299
-2359.5	0.499715	0.430893	0.567906	0.577641	0.526513	0.472941
-2333.5	0.474564	0.408274	0.540263	0.552514	0.500348	0.448805
-2307.5	0.434789	0.371402	0.497624	0.512524	0.459397	0.410206
-2281.5	0.401911	0.341286	0.462019	0.479727	0.425411	0.378435
-2255.5	0.385501	0.326864	0.443647	0.463263	0.408214	0.362811
-2229.5	0.375282	0.318235	0.431861	0.453018	0.397369	0.353217
-2203.5	0.364461	0.308938	0.419538	0.442242	0.385949	0.342995
-2177.5	0.351232	0.297223	0.404814	0.428886	0.372122	0.330365
-2151.5	0.34024	0.287525	0.392544	0.417779	0.360619	0.319883
-2125.5	0.333398	0.28171	0.384686	0.411021	0.353373	0.313443
-2099.5	0.328679	0.277767	0.379202	0.406326	0.348351	0.309027
-2073.5	0.324203	0.273976	0.37405	0.401905	0.343608	0.304819
-2047.5	0.32029	0.27059	0.369615	0.397981	0.339487	0.301112
-2021.5	0.317043	0.267718	0.366	0.394601	0.336093	0.298014
-1995.5	0.315662	0.266584	0.364374	0.393314	0.334615	0.296729
-1969.5	0.3145	0.265548	0.363087	0.392197	0.333403	0.295616
-1943.5	0.313231	0.264282	0.361815	0.390761	0.332132	0.29435
-1917.5	0.313701	0.264591	0.362444	0.39111	0.332663	0.294758
-1891.5	0.316396	0.266922	0.365498	0.393708	0.335501	0.297311
-1865.5	0.320241	0.2703	0.369804	0.397801	0.33953	0.300972
-1839.5	0.324546	0.273961	0.374744	0.402233	0.344088	0.305024
-1813.5	0.327449	0.276087	0.378415	0.40488	0.347292	0.307626
-1787.5	0.333326	0.280999	0.385245	0.410781	0.353547	0.313126
-1761.5	0.340437	0.28701	0.393441	0.418	0.36109	0.319806
-1735.5	0.347978	0.293306	0.402211	0.425543	0.369119	0.32686
-1709.5	0.3566	0.300451	0.412289	0.433998	0.378318	0.334904
-1683.5	0.366803	0.30901	0.424115	0.444186	0.389168	0.344463
-1657.5	0.378777	0.319126	0.437919	0.456187	0.401871	0.355707
-1631.5	0.390871	0.329235	0.451969	0.468251	0.414746	0.367022
-1605.5	0.403509	0.339727	0.46672	0.480728	0.428226	0.378817
-1579.5	0.417239	0.351131	0.482741	0.494209	0.442872	0.391634
-1553.5	0.43497	0.366355	0.502939	0.512179	0.461596	0.408372
-1527.5	0.451235	0.379867	0.52191	0.528226	0.478946	0.423553
-1501.5	0.469451	0.39504	0.543117	0.546258	0.498364	0.440568
-1475.5	0.490404	0.412683	0.567324	0.567134	0.52063	0.460211
-1449.5	0.511969	0.430903	0.592172	0.588747	0.543524	0.480447
-1423.5	0.530561	0.446368	0.613831	0.607165	0.563357	0.4978
-1397.5	0.55071	0.46352	0.636918	0.627198	0.584702	0.516754
-1371.5	0.575574	0.485336	0.664771	0.652163	0.610794	0.540392
-1345.5	0.603195	0.509685	0.695597	0.679692	0.639735	0.566693
-1319.5	0.643618	0.54649	0.739566	0.72011	0.681643	0.605632
-1293.5	0.70226	0.601191	0.80207	0.779048	0.74194	0.662619
-1267.5	0.759486	0.654263	0.863363	0.836451	0.80091	0.718102
-1241.5	0.783567	0.67423	0.891457	0.860177	0.826649	0.740526
-1215.5	0.794955	0.681069	0.907277	0.871284	0.839842	0.750112
-1189.5	0.815018	0.696085	0.932254	0.891276	0.861929	0.768155
-1163.5	0.858492	0.733827	0.981305	0.934473	0.907754	0.80928
-1137.5	0.905775	0.77509	1.03444	0.981693	0.957523	0.854079
-1111.5	0.948853	0.811828	1.08367	1.02434	1.00321	0.894553
-1085.5	0.996165	0.852357	1.13756	1.07161	1.05333	0.93906
-1059.5	1.04869	0.89764	1.19709	1.12395	1.10886	0.988574
-1033.5	1.10521	0.946352	1.26115	1.18029	1.16865	1.04183
-1007.5	1.16925	1.00211	1.33318	1.24422	1.23618	1.10238
-981.5	1.23397	1.05801	1.40638	1.30866	1.30463	1.16337
-955.5	1.3033	1.11801	1.48467	1.37766	1.37793	1.22874
-929.5	1.37546	1.1804	1.56621	1.44949	1.45428	1.29672
-903.5	1.45023	1.24496	1.65075	1.52391	1.53345	1.3671
-877.5	1.53117	1.31514	1.74194	1.6047	1.61906	1.44336
-851.5	1.61709	1.38966	1.83871	1.69046	1.70998	1.52429
-825.5	1.73194	1.49321	1.96429	1.80486	1.82997	1.63402
-799.5	1.89409	1.64455	2.13665	1.96658	1.99736	1.79091
-773.5	2.06324	1.80279	2.31609	2.13529	2.17193	1.95466
-747.5	2.17963	1.90614	2.44474	2.25121	2.29438	2.06499
-721.5	2.22565	1.93687	2.50509	2.29691	2.347	2.10442
-695.5	2.27444	1.96952	2.56895	2.34536	2.40278	2.14622
-669.5	2.35014	2.02944	2.65934	2.42052	2.48554	2.21487
-643.5	2.47677	2.14078	2.80013	2.54669	2.61948	2.33421
-617.5	2.60275	2.25114	2.9405	2.6721	2.75297	2.45269
-591.5	2.74216	2.37428	3.09484	2.811	2.90037	2.58412
-565.5	2.88181	2.49656	3.25035	2.95006	3.04859	2.71521
-539.5	3.03284	2.62906	3.41819	3.10049	3.20889	2.85696
-513.5	3.18576	2.76314	3.58813	3.25294	3.37139	3.00032
-487.5	3.33416	2.89193	3.75414	3.40061	3.52978	3.13874
-461.5	3.49715	3.03506	3.93485	3.563	3.70319	3.29133
-435.5	3.67584	3.1936	4.13137	3.74109	3.89279	3.45912
-409.5	3.87157	3.36885	4.34509	3.93623	4.1	3.64338
-383.5	4.05865	3.53422	4.55112	4.1225	4.2992	3.81836
-357.5	4.24757	3.7005	4.75964	4.3105	4.5009	3.9945
-331.5	4.45949	3.89004	4.99075	4.52164	4.72612	4.19314
-305.5	4.68996	4.09796	5.24031	4.75128	4.97056	4.40964
-279.5	4.91813	4.30247	5.48836	4.97854	5.21353	4.62303
-253.5	5.13285	4.49168	5.72436	5.19221	5.44401	4.82202
-227.5	5.39291	4.72799	6.00382	5.45154	5.72031	5.06585
-201.5	5.65895	4.97068	6.28869	5.71655	6.003	5.31527
-175.5	6.00677	5.29219	6.65724	6.06313	6.37132	5.64262
-149.5	6.3074	5.55967	6.98402	6.36242	6.69545	5.91976
-123.5	6.69993	5.91548	7.40466	6.75355	7.11667	6.28363
-97.5	7.05784	6.23676	7.79012	7.10993	7.50354	6.61262
-71.5	7.49759	6.64881	8.24922	7.54789	7.97158	7.02412
-45.5	7.93447	7.06359	8.70049	7.98316	8.43534	7.43415
-19.5	8.36956	7.47908	9.14752	8.41663	8.8975	7.8422
6.5	8.81699	7.91213	9.60229	8.8626	9.37132	8.26327
32.5	9.19542	8.27338	9.99029	9.2394	9.77632	8.61516
58.5	9.58294	8.64876	10.3831	9.62547	10.1894	8.97709
84.5	9.96763	9.02497	10.77	10.0088	10.599	9.33699
110.5	10.3075	9.35301	11.1146	10.3472	10.9647	9.65092
136.5	10.6679	9.70659	11.4757	10.7062	11.3507	9.98588
162.5	11.0909	10.1306	11.8925	11.1278	11.7997	10.3829
188.5	11.4782	10.5198	12.2732	11.5137	12.2121	10.7451
214.5	11.8328	10.8723	12.624	11.8668	12.5939	11.0725
240.5	12.2601	11.3108	13.0371	12.2925	13.0466	11.4745
266.5	12.6108	11.6841	13.3671	12.642	13.4096	11.813
292.5	12.7665	11.874	13.4974	12.7971	13.5519	11.9819
318.5	13.0275	12.1876	13.7187	13.0574	13.7931	12.2626
344.5	13.373	12.5838	14.0245	13.4018	14.1266	12.6201
370.5	13.9111	13.1603	14.5285	13.9379	14.6813	13.1418
396.5	14.502	13.7885	15.0849	14.5266	15.2981	13.7067
422.5	14.9722	14.2777	15.5345	14.9949	15.8038	14.1415
448.5	15.3516	14.6669	15.9004	15.3728	16.2222	14.4818
474.5	15.6088	14.927	16.1506	15.629	16.513	14.7055
500.5	15.8163	15.1407	16.3498	15.8356	16.7452	14.8883
526.5	16.066	15.4107	16.5813	16.0844	17.0109	15.122
552.5	16.2904	15.654	16.789	16.3079	17.2501	15.3316
578.5	16.5822	15.9753	17.056	16.5987	17.5568	15.6086
604.5	16.7226	16.1257	17.1869	16.7385	17.7109	15.7353
630.5	16.9719	16.4008	17.4145	16.9869	17.9746	15.9702
656.5	17.1449	16.5903	17.5733	17.1592	18.161	16.1299
682.5	17.3553	16.8222	17.7654	17.3688	18.3867	16.3249
708.5	17.5141	16.9986	17.9096	17.527	18.556	16.4731
734.5	17.7459	17.2571	18.1195	17.7579	18.8031	16.6897
760.5	17.8712	17.3979	18.2324	17.8828	18.9356	16.808
786.5	18.0299	17.5755	18.3757	18.0409	19.1056	16.9553
812.5	18.1419	17.7003	18.477	18.1524	19.2273	17.0576
838.5	18.2999	17.8767	18.6199	18.3099	19.3998	17.2012
864.5	18.4731	18.0735	18.7744	18.4824	19.5826	17.3647
890.5	18.6461	18.2707	18.9286	18.6548	19.7653	17.5281
916.5	18.8155	18.4636	19.0795	18.8236	19.9461	17.6861
942.5	18.8637	18.5173	19.1232	18.8716	20.0012	17.7275
968.5	18.9675	18.635	19.2159	18.975	20.1149	17.8214
994.5	19.0947	18.7808	19.3287	19.1017	20.2506	17.94
1020.5	19.2276	18.9346	19.4456	19.2341	20.3887	18.0677
1046.5	19.2921	19.008	19.5031	19.2983	20.4604	18.125
1072.5	19.381	19.1093	19.5822	19.3869	20.5597	18.2035
1098.5	19.5365	19.29	19.7188	19.5418	20.7225	18.3517
1124.5	19.6121	19.3777	19.7852	19.6171	20.8027	18.4227
1150.5	19.5998	19.3633	19.7746	19.6049	20.7906	18.4104
1176.5	19.6006	19.3653	19.7746	19.6057	20.7867	18.4157
1202.5	19.5294	19.2868	19.7098	19.5348	20.6946	18.3654
1228.5	19.4389	19.1958	19.6223	19.4446	20.5457	18.3331
1254.5	19.6848	19.491	19.8328	19.6896	20.7462	18.6244
1280.5	20.0124	19.8697	20.1215	20.016	21.0676	18.9581
1306.5	20.4667	20.3883	20.5258	20.4686	21.5823	19.3522
1332.5	20.3944	20.2986	20.4656	20.3965	21.5703	19.2198
1358.5	19.9828	19.8149	20.107	19.9864	21.1638	18.8029
1384.5	19.7804	19.5872	19.9253	19.7848	20.9128	18.6492
1410.5	19.9842	19.8303	20.1007	19.9879	21.0827	18.8869
1436.5	20.3825	20.2907	20.4517	20.3846	21.4945	19.2715
1462.5	20.5424	20.4728	20.5941	20.5439	21.7074	19.3786
1488.5	20.3587	20.2553	20.4351	20.3609	21.5478	19.1708
1514.5	20.1297	19.9901	20.2336	20.1328	21.2914	18.9691
1540.5	20.2793	20.1672	20.3632	20.2819	21.4237	19.1361
1566.5	20.5748	20.5101	20.6229	20.5763	21.7503	19.4006
1592.5	20.6541	20.6007	20.6932	20.6552	21.8743	19.4351
1618.5	20.6678	20.615	20.7061	20.6689	21.9266	19.4104
1644.5	20.5287	20.4489	20.5864	20.5302	21.7995	19.2592
1670.5	20.6248	20.5621	20.67	20.626	21.9161	19.3348
1696.5	20.5828	20.5112	20.6342	20.5842	21.8869	19.2801
1722.5	20.613	20.5466	20.6605	20.6143	21.9279	19.2996
1748.5	20.5587	20.4813	20.6141	20.5602	21.8781	19.2408
1774.5	20.6293	20.5655	20.6748	20.6305	21.9542	19.3059
1800.5	20.6227	20.5577	20.6691	20.6239	21.9462	19.3007
1826.5	20.6486	20.5891	20.6912	20.6498	21.9663	19.3324
1852.5	20.6691	20.6137	20.7087	20.6701	21.9836	19.356
1878.5	20.7841	20.7514	20.8075	20.7847	22.0995	19.4701
1904.5	20.7989	20.7691	20.8203	20.7995	22.1162	19.4831
1930.5	20.8406	20.8192	20.8559	20.841	22.1431	19.5395
1956.5	20.8458	20.8258	20.8602	20.8462	22.1339	19.5591
1982.5	21.0049	21.0154	20.9973	21.0047	22.2934	19.7177
2008.5	21.0067	21.0176	20.9989	21.0065	22.2949	19.7199
2034.5	20.9897	20.9973	20.9842	20.9896	22.274	19.7067
2060.5	20.8656	20.8496	20.8772	20.8659	22.1373	19.5952
2086.5	20.9151	20.9086	20.9199	20.9153	22.179	19.6526
2112.5	20.8163	20.7916	20.8343	20.8168	22.0618	19.5721
2138.5	20.7418	20.7043	20.7694	20.7426	21.9634	19.5215
2164.5	20.9808	20.9864	20.9767	20.9807	22.2008	19.762
2190.5	20.9251	20.9207	20.9284	20.9252	22.1263	19.7251
2216.5	20.9567	20.9579	20.9559	20.9567	22.1339	19.7808
2242.5	20.8644	20.8501	20.875	20.8647	22.0068	19.723
2268.5	21.1095	21.1365	21.0894	21.1089	22.2653	19.9548
2294.5	21.1298	21.1616	21.1063	21.1291	22.3313	19.9295
2320.5	21.2124	21.2613	21.1769	21.2114	22.4657	19.9605
2346.5	20.9981	21.0072	20.9915	20.9979	22.2687	19.7288
2372.5	20.9386	20.9364	20.9401	20.9386	22.2015	19.6769
2398.5	20.9681	20.9715	20.9657	20.9681	22.2169	19.7206
2424.5	21.0311	21.0461	21.0202	21.0308	22.2797	19.7838
2450.5	21.1063	21.1357	21.085	21.1057	22.3695	19.8444
2476.5	21.0492	21.0681	21.0355	21.0488	22.3285	19.7713
2502.5	20.961	20.9631	20.9595	20.961	22.2408	19.6825
2528.5	20.9685	20.9721	20.966	20.9685	22.2443	19.6941
2554.5	20.9686	20.9721	20.966	20.9685	22.2466	19.6919
2580.5	21.0148	21.0272	21.0059	21.0146	22.2934	19.7376
2606.5	21.0625	21.0841	21.0469	21.0621	22.3504	19.776
2632.5	21.0888	21.1156	21.0696	21.0883	22.3798	19.7993
2658.5	21.0156	21.0282	21.0064	21.0153	22.3085	19.724
2684.5	21.0627	21.0845	21.047	21.0622	22.3595	19.7672
2710.5	20.9337	20.9305	20.936	20.9337	22.2295	19.6392
2736.5	21.062	21.0838	21.0464	21.0616	22.3625	19.7629
2762.5	21.1057	21.136	21.0839	21.1051	22.4089	19.8039
2788.5	21.2904	21.3575	21.2423	21.2891	22.6064	19.9757
2814.5	21.2728	21.337	21.227	21.2716	22.5964	19.9506
2840.5	21.2324	21.2887	21.1922	21.2313	22.5598	19.9064
2866.5	21.1013	21.1313	21.0799	21.1007	22.423	19.781
2892.5	21.0528	21.0732	21.0383	21.0525	22.371	19.7361
2918.5	20.9603	20.9623	20.9588	20.9602	22.2679	19.6541
2944.5	20.894	20.8832	20.9019	20.8942	22.1942	19.5953
2970.5	20.8921	20.8808	20.9002	20.8923	22.1939	19.5916
2996.5	20.9569	20.9582	20.9559	20.9569	22.2633	19.6519
3022.5	21.0687	21.0921	21.052	21.0683	22.3816	19.7572
3048.5	21.0288	21.0442	21.0177	21.0285	22.3368	19.7222
3074.5	21.0715	21.0954	21.0544	21.0711	22.3846	19.7599
3100.5	21.1669	21.21	21.1362	21.1661	22.4898	19.8454
3126.5	21.051	21.071	21.0367	21.0506	22.369	19.7344
3152.5	20.736	20.6959	20.7652	20.7368	21.9971	19.4763
3178.5	20.7568	20.7225	20.7821	20.7576	21.9626	19.5523
3204.5	21.0385	21.0538	21.0271	21.0381	22.2186	19.8595
3230.5	21.4612	21.5525	21.3941	21.4592	22.6722	20.2513
3256.5	21.6243	21.7542	21.5307	21.6217	22.9149	20.335
3282.5	21.5777	21.7072	21.4862	21.5753	22.9433	20.2136
3308.5	21.3964	21.4915	21.3299	21.3948	22.7988	19.9957
3334.5	21.2393	21.3013	21.196	21.2382	22.6482	19.832
3360.5	21.3089	21.387	21.2547	21.3076	22.7347	19.8848
3386.5	21.4544	21.567	21.3768	21.4526	22.9117	19.9988
3412.5	21.4086	21.5117	21.3377	21.4069	22.8734	19.9455
3438.5	21.3957	21.4963	21.3265	21.394	22.8661	19.927
3464.5	21.364	21.4565	21.3003	21.3625	22.8217	19.9081
3490.5	21.3034	21.3812	21.2495	21.3021	22.7441	19.8643
3516.5	21.2716	21.3411	21.2232	21.2704	22.6899	19.855
3542.5	21.371	21.4609	21.3081	21.3694	22.7766	19.967
3568.5	21.3368	21.4189	21.2793	21.3354	22.7347	19.9406
3594.5	21.3469	21.4294	21.2888	21.3455	22.7211	19.9743
3620.5	21.2689	21.3333	21.2232	21.2677	22.6106	19.9287
3646.5	21.4809	21.5874	21.4051	21.4789	22.8156	20.1476
3672.5	21.5687	21.6935	21.4799	21.5663	22.9098	20.229
3698.5	21.6105	21.7463	21.5145	21.608	22.9722	20.2503
3724.5	21.422	21.5196	21.3531	21.4202	22.7911	20.0544
3750.5	21.4394	21.5407	21.368	21.4376	22.8081	20.0723
3776.5	21.4395	21.5407	21.3681	21.4377	22.8077	20.0729
3802.5	21.5226	21.6412	21.439	21.5205	22.8925	20.1543
3828.5	21.4131	21.5086	21.3457	21.4114	22.778	20.0497
3854.5	21.3874	21.4782	21.3235	21.3858	22.7595	20.0169
3880.5	21.3562	21.4403	21.2968	21.3546	22.7262	19.9876
3906.5	21.3437	21.4252	21.2862	21.3422	22.7134	19.9754
3932.5	21.3964	21.4891	21.3311	21.3947	22.769	20.0253
3958.5	21.4524	21.5569	21.3788	21.4505	22.8281	20.0782
3984.5	21.3951	21.4877	21.3299	21.3934	22.7708	20.021
4010.5	21.4466	21.5504	21.3736	21.4448	22.8271	20.0676
4036.5	21.4051	21.5004	21.3381	21.4034	22.7881	20.0235
4062.5	21.4922	21.6063	21.4121	21.4902	22.8809	20.105
4088.5	21.4044	21.4995	21.3376	21.4027	22.7864	20.024
4114.5	21.2799	21.3479	21.2319	21.2787	22.6445	19.9168
4140.5	21.1523	21.1922	21.1237	21.1515	22.4685	19.8376
4166.5	21.1044	21.1332	21.0835	21.1038	22.3618	19.8483
4192.5	21.3141	21.3807	21.2654	21.3127	22.5509	20.0785
4218.5	21.6863	21.8256	21.5855	21.6835	22.9574	20.4165
4244.5	21.8016	21.9719	21.6802	21.7984	23.1328	20.4718
4270.5	21.6443	21.7876	21.5431	21.6416	23.0112	20.2789
4296.5	21.38	21.4692	21.317	21.3783	22.7532	20.0083
4322.5	21.322	21.3994	21.2675	21.3206	22.6972	19.9484
4348.5	21.326	21.4046	21.2707	21.3246	22.7072	19.9463
4374.5	21.351	21.4353	21.2917	21.3495	22.7391	19.9644
4400.5	21.3794	21.4697	21.316	21.3778	22.7667	19.9936
4426.5	21.2873	21.3579	21.2376	21.286	22.6702	19.9059
4452.5	21.3978	21.492	21.3316	21.3961	22.7868	20.0103
4478.5	21.2416	21.3023	21.1989	21.2405	22.6173	19.8675
4504.5	20.9806	20.9866	20.9763	20.9805	22.2918	19.6707
4530.5	20.9325	20.9293	20.9348	20.9326	22.1603	19.706
4556.5	21.2641	21.3192	21.2235	21.263	22.4557	20.0737
4582.5	21.6905	21.8245	21.5923	21.6877	22.9148	20.4673
4608.5	21.8814	22.0623	21.7514	21.8779	23.1805	20.5837
4634.5	21.801	21.9771	21.6768	21.7978	23.1701	20.4334
4660.5	21.7122	21.8771	21.5974	21.7094	23.1324	20.2936
4686.5	21.5104	21.632	21.4258	21.5083	22.9344	20.0879
4712.5	21.4315	21.5358	21.3589	21.4297	22.8536	20.0109
4738.5	20.8168	20.7888	20.8365	20.8173	22.2058	19.4294
4764.5	20.4192	20.3093	20.4968	20.4212	21.7898	19.0503
4790.5	20.2852	20.148	20.3821	20.2877	21.6516	18.9204
4816.5	20.5716	20.492	20.6275	20.573	21.959	19.1858
4842.5	20.4002	20.2856	20.4809	20.4023	21.7777	19.0243
4868.5	20.2453	20.0991	20.3484	20.2479	21.6172	18.875
