# Supplementary material for: Hypoxia triggers collective aerotactic migration in Dictyostelium discoideum
Source: eLife. 2021 Aug 20;10:e64731. doi: 10.7554/eLife.64731 (PMC8378850; doi:10.7554/eLife.64731)
Supplement: Figure 2—figure supplement 2—source data 1. [file elife-64731-fig2-figsupp2-data1.xlsx]

## Sheet: Figure 2 figure supplement 2A
time (min)	intensity (AU)
0	136.65
10	135.64
20	135.45
30	135.42
40	296.38
50	895.28
60	1310.96
70	1482.84
80	1556.02
90	1583.66
100	1622.8
110	1640.43
120	1656.26
130	1614.11
140	1619.29
150	1635.8
160	1648.69
170	1630.16
180	1658.94
190	1670.47
200	1663.39
210	1644.18
220	1669.48
230	1652.96
240	1675.77
250	1687.52
260	1663.24
270	1678.71
280	393.44
290	378.74
300	374.99
310	375.41
320	374.47
330	377.32
340	248.34
350	244.02
360	243.2
370	242.87
380	241.69
390	242.43
400	182.41
410	180.46
420	179.27
430	179.09
440	180.76
450	181.66
460	153.44
470	152.02
480	151.86
490	152.26
500	152.73
510	152.72
520	139.29
530	137.13
540	136.95
550	136.59
560	136.74
570	136.16
580	135.67
590	135.67
600	135.86
610	135.96
620	135.99
630	136.38
640	136.52
650	136.27
660	136.27
670	136.61
680	136.42
690	136.25
700	136.54
710	136.88
720	136.6
730	1541.35

## Sheet: Figure 2 figure supplement 2B
Figure 2 figure supplement 2B
O2 (%)	Stern-Volmer relation
21	135.79
0	1676.31
1	376.186
2	242.842
5	180.248
10	152.318
21	136.418

## Sheet: Figure 2 figure supplement 2C-D
Figure 2 figure supplement 2C-D
Position relative to median axis (µm)	Background Bg	Fluo at 21%
1524.6	121	132.985
1304.1	122	134.942
1083.6	122.5	136.6
863.1	122.75	137.963
642.6	122	139.028
422.1	121.5	138.62
201.6	121	137.36
-18.9	119.75	134.34
-239.4	121	134.075
-459.9	121.5	135.79
-680.4	122	136.92
-900.9	123	138.537
-1121.4	123	137.827
-1341.9	122	136.632
-1562.4	122	135.93
