# Supplementary material for: Hypoxia triggers collective aerotactic migration in Dictyostelium discoideum
Source: eLife. 2021 Aug 20;10:e64731. doi: 10.7554/eLife.64731 (PMC8378850; doi:10.7554/eLife.64731)
Supplement: Figure 2—figure supplement 3—source data 1. [file elife-64731-fig2-figsupp3-data1.xlsx]

## Sheet: Figure 2 figure supplement 3D-F
Position	ROI	Position from left or upper side x(µm)	Background Bg	Stern-Volmer constant Ksv	I21
Pos3 (no cover)	1	104.576	1152	2.93	1261.44
Pos3 (no cover)	2	313.728	1175	2.92	1292.39
Pos3 (no cover)	3	522.88	1200	2.99	1321.53
Pos3 (no cover)	4	732.032	1235	3.02	1363.29
Pos3 (no cover)	5	941.184	1290	3.16	1419.72
Pos3 (no cover)	6	1150.34	1315	3.08	1455.54
Pos3 (no cover)	7	1359.49	1345	3.08	1493.7
Pos3 (no cover)	8	1568.64	1380	3.1	1536.65
Pos3 (no cover)	9	1777.79	1410	3.09	1575.65
Pos3 (no cover)	10	1986.94	1425	3.08	1597.44
Pos3 (no cover)	11	2196.1	1420	3.07	1595.77
Pos3 (no cover)	12	2405.25	1400	3.14	1568.97
Pos3 (no cover)	13	2614.4	1365	3.14	1528.9
Pos3 (no cover)	14	2823.55	1330	3.13	1490.49
Pos3 (no cover)	15	3032.7	1300	3.13	1458.46
Pos3 (no cover)	16	3241.86	1270	3.09	1427.71
Pos3 (no cover)	17	3451.01	1250	3.18	1400.33
Pos3 (no cover)	18	3660.16	1220	3.12	1367.58
Pos3 (no cover)	19	3869.31	1190	3.19	1327.22
Pos3 (no cover)	20	4078.46	1135	3.14	1267.1
Pos4 (cover)	1	98.04			1352.79
Pos4 (cover)	2	294.12			1388.47
Pos4 (cover)	3	490.2			1423.55
Pos4 (cover)	4	686.28			1459.17
Pos4 (cover)	5	882.36			1488.92
Pos4 (cover)	6	1078.44			1510.88
Pos4 (cover)	7	1274.52	1385	9.86	1540.48
Pos4 (cover)	8	1470.6	1405	8.27	1571.52
Pos4 (cover)	9	1666.68	1415	6.86	1588.16
Pos4 (cover)	10	1862.76	1410	5.72	1587.08
Pos4 (cover)	11	2058.84	1375	4.89	1550.26
Pos4 (cover)	12	2254.92	1362.5	4.25	1531.28
Pos4 (cover)	13	2451	1352.5	4.05	1513.67
Pos4 (cover)	14	2647.08	1315	3.93	1468.63
Pos4 (cover)	15	2843.16	1270	3.86	1415.05
Pos4 (cover)	16	3039.24	1237.5	3.82	1376.31
Pos4 (cover)	17	3235.32	1215	3.82	1348.2
Pos4 (cover)	18	3431.4	1190	3.73	1323.17

## Sheet: Figure 2 figure supplement 3H
Figure 2 figure supplement 3H
		Calculated O2 (%) : robustness test
Position relative to spot center (µm)	Optimum	02 (%) for I21: +2%.	02 (%) for I21: -2%.	02 (%) for Bg: +2%	02 (%) for Bg: -2%	02 (%) for Io: x1.75
-2073.82	7.90092	9.41273	6.72518	7.14601	8.57402	7.94822
-2070.55	7.93496	9.26547	6.61361	7.18147	8.60738	7.98229
-2067.28	8.08779	9.3099	6.64854	7.33014	8.76235	8.13461
-2064.02	7.64287	9.16537	6.5521	6.8987	8.30899	7.69111
-2060.75	7.88692	9.26478	6.61213	7.13438	8.559	7.93448
-2057.48	8.04541	9.21223	6.57927	7.29064	8.71779	8.09233
-2054.21	7.75086	9.25526	6.6092	7.00566	8.41747	7.79888
-2050.94	7.68968	9.14966	6.53477	6.94455	8.35679	7.73789
-2047.68	8.06266	9.11172	6.50813	7.30539	8.73708	8.10958
-2044.41	7.77408	9.32971	6.6604	7.02647	8.44261	7.82204
-2041.14	7.82619	9.21471	6.57383	7.08107	8.49168	7.87394
-2037.87	8.16792	9.31574	6.65904	7.41317	8.83942	8.21454
-2034.6	7.71984	9.43041	6.74	6.97547	8.38579	7.76795
-2031.34	7.7783	8.87181	6.33168	7.03444	8.44324	7.82624
-2028.07	7.82861	9.25434	6.61405	7.08132	8.49684	7.87644
-2024.8	7.70102	9.40108	6.71829	6.95985	8.36436	7.74922
-2021.53	7.94774	9.03963	6.45946	7.19427	8.62008	7.9951
-2018.26	7.92463	9.0065	6.43407	7.1748	8.59429	7.97215
-2015	7.89508	9.44896	6.75146	7.14391	8.56589	7.94265
-2011.73	7.98278	9.05305	6.46849	7.23131	8.65232	8.03007
-2008.46	7.71712	9.08146	6.48877	6.97278	8.38325	7.76533
-2005.19	7.50886	9.53063	6.81717	6.77646	8.16659	7.55779
-2001.92	7.83356	8.98544	6.42028	7.08525	8.50238	7.88139
-1998.66	7.76718	9.08143	6.48997	7.02674	8.42966	7.8153
-1995.39	7.76485	9.14234	6.53686	7.02347	8.42812	7.8129
-1992.12	7.6856	9.02842	6.45378	6.94379	8.34955	7.7339
-1988.85	7.63849	9.3171	6.66274	6.89974	8.30018	7.68699
-1985.58	7.68037	9.28109	6.64063	6.93857	8.34494	7.72874
-1982.32	7.70886	9.26255	6.62042	6.9668	8.37312	7.75713
-1979.05	7.56672	9.3175	6.66435	6.83126	8.22625	7.61548
-1975.78	7.69709	9.00104	6.43535	6.95717	8.3594	7.7454
-1972.51	7.7752	8.79749	6.29014	7.03571	8.43708	7.82333
-1969.24	7.83795	9.08667	6.49964	7.09443	8.50224	7.88575
-1965.98	7.79022	9.07077	6.49303	7.04728	8.45407	7.83829
-1962.71	7.88305	9.04578	6.46592	7.13698	8.54982	7.93077
-1959.44	7.66473	9.00201	6.4363	6.92688	8.32572	7.71328
-1956.17	7.6586	8.90729	6.3669	6.922	8.31827	7.70717
-1952.9	7.6136	8.9986	6.4347	6.87808	8.27337	7.6623
-1949.64	7.94377	9.02644	6.45607	7.19647	8.61087	7.9914
-1946.37	7.75661	8.82769	6.3109	7.01778	8.4178	7.80485
-1943.1	7.46418	8.99359	6.43207	6.73683	8.11766	7.51339
-1939.83	7.64007	9.05549	6.48241	6.9022	8.3009	7.68866
-1936.56	7.64051	9.22882	6.60389	6.90382	8.3009	7.68918
-1933.3	8.00204	9.02726	6.46101	7.25294	8.67062	8.04955
-1930.03	7.58849	9.26587	6.62973	6.85836	8.24306	7.63742
-1926.76	7.61083	8.9293	6.39359	6.8747	8.27095	7.65959
-1923.49	7.66214	8.95873	6.41751	6.92821	8.3203	7.71077
-1920.22	7.50753	8.91193	6.37882	6.77973	8.16101	7.55668
-1916.96	7.4679	9.21851	6.6013	6.74156	8.12062	7.51727
-1913.69	7.5269	9.08328	6.50397	6.79695	8.1824	7.57597
-1910.42	7.52735	8.74411	6.25875	6.79627	8.18356	7.57643
-1907.15	7.6091	8.97032	6.421	6.8763	8.26618	7.65782
-1903.88	7.65102	8.89596	6.37023	6.91941	8.30698	7.69982
-1900.62	7.53106	9.33702	6.69377	6.801	8.18621	7.58021
-1897.35	7.42037	8.7762	6.28727	6.69644	8.0715	7.46985
-1894.08	7.71036	8.9134	6.38186	6.97527	8.36943	7.75895
-1890.81	7.51565	8.9806	6.43274	6.78722	8.1699	7.56482
-1887.54	7.41104	8.7221	6.249	6.68726	8.06209	7.46066
-1884.28	7.47946	8.72303	6.25234	6.7531	8.13201	7.52882
-1881.01	7.74712	8.8162	6.31395	7.01451	8.40321	7.79548
-1877.74	7.42722	8.78048	6.28642	6.70282	8.07871	7.47682
-1874.47	7.70834	8.86616	6.34756	6.97208	8.36813	7.75689
-1871.2	7.33543	8.94734	6.41526	6.61804	7.98135	7.3853
-1867.94	7.46353	8.76772	6.28234	6.73686	8.11645	7.51295
-1864.67	7.28319	8.67844	6.215	6.56558	7.93001	7.33327
-1861.4	7.3949	8.95071	6.41829	6.67333	8.04445	7.44463
-1858.13	7.38987	8.73668	6.25963	6.66582	8.04093	7.43948
-1854.86	7.32794	8.59969	6.16075	6.60908	7.97529	7.37781
-1851.6	7.4541	8.7161	6.24666	6.72974	8.10523	7.50355
-1848.33	7.52151	9.03625	6.47523	6.79685	8.17247	7.57075
-1845.06	7.43286	8.67873	6.2217	6.71093	8.08227	7.48237
-1841.79	7.50408	8.98453	6.43936	6.77838	8.15618	7.55343
-1838.52	7.38825	8.54362	6.12357	6.66911	8.03557	7.43807
-1835.26	7.41553	8.75389	6.27503	6.69745	8.06157	7.46524
-1831.99	7.39846	8.50535	6.09492	6.67879	8.04615	7.44821
-1828.72	7.45037	8.61564	6.17793	6.73066	8.09775	7.5
-1825.45	7.33661	8.63048	6.1823	6.61838	7.98371	7.38658
-1822.18	7.41089	8.57231	6.14196	6.69073	8.05942	7.46066
-1818.92	7.17858	8.71988	6.24743	6.46759	7.82022	7.22908
-1815.65	7.39972	8.77927	6.29339	6.67653	8.05026	7.44938
-1812.38	7.41291	8.70179	6.23485	6.69432	8.05987	7.46273
-1809.11	7.36306	8.75692	6.27985	6.64366	8.0105	7.41299
-1805.84	7.09724	8.65123	6.20734	6.39088	7.73531	7.14808
-1802.58	7.15559	8.67862	6.22668	6.44626	7.79626	7.20624
-1799.31	7.17214	8.60033	6.16641	6.46305	7.81268	7.22276
-1796.04	7.25373	8.64827	6.20614	6.53921	7.89773	7.30399
-1792.77	7.25303	8.5334	6.11979	6.54047	7.89579	7.30335
-1789.5	7.2085	8.62276	6.18813	6.4941	7.85319	7.25891
-1786.24	7.29991	8.41996	6.03695	6.58372	7.94501	7.35004
-1782.97	7.31585	8.65237	6.20356	6.60209	7.95873	7.36605
-1779.7	7.20145	8.62788	6.19545	6.49053	7.84294	7.25192
-1776.43	7.27162	8.61747	6.18054	6.56072	7.9131	7.32201
-1773.16	7.24131	8.24736	5.91213	6.52943	7.88297	7.29167
-1769.9	7.00375	8.35771	5.99423	6.30455	7.63653	7.05504
-1766.63	7.14467	8.36033	5.9976	6.43967	7.78172	7.19554
-1763.36	7.18646	8.44548	6.05521	6.47797	7.82607	7.2371
-1760.09	7.21117	8.46967	6.07452	6.50352	7.84991	7.26179
-1756.82	7.079	8.40229	6.02315	6.37608	7.71457	7.13003
-1753.56	7.1621	8.46482	6.06795	6.45731	7.79897	7.2129
-1750.29	7.16164	8.52241	6.11642	6.45531	7.79979	7.21238
-1747.02	7.00208	8.39131	6.01775	6.30396	7.63408	7.05344
-1743.75	7.28272	8.51867	6.12069	6.57166	7.92374	7.3331
-1740.48	7.00381	8.46482	6.0706	6.3041	7.63736	7.05515
-1737.22	7.028	8.16628	5.86301	6.32789	7.66132	7.07924
-1733.95	7.14578	8.38791	6.02424	6.44117	7.78202	7.19664
-1730.68	7.07144	8.31274	5.96624	6.37094	7.70492	7.12253
-1727.41	7.05357	8.40307	6.03652	6.35492	7.6859	7.10483
-1724.14	6.91211	8.24916	5.92131	6.21647	7.54255	6.96378
-1720.88	6.95235	8.38129	6.02155	6.2575	7.58142	7.00388
-1717.61	6.88021	8.36192	6.00227	6.18952	7.50685	6.93201
-1714.34	7.13837	8.15993	5.85872	6.43656	7.77247	7.18931
-1711.07	6.85343	8.52946	6.12649	6.1647	7.47792	6.90533
-1707.8	6.93164	8.16759	5.8657	6.23908	7.55963	6.98336
-1704.54	6.96871	8.22605	5.9055	6.27454	7.59782	7.02027
-1701.27	7.01663	8.28488	5.95071	6.32154	7.64593	7.06801
-1698	7.10682	8.19613	5.88414	6.40755	7.73923	7.15799
-1694.73	6.86733	8.24973	5.92774	6.17711	7.49375	6.9192
-1691.46	6.83229	8.05032	5.77841	6.14443	7.45638	6.88436
-1688.2	6.99045	8.10989	5.82386	6.29335	7.62139	7.04195
-1684.93	7.02507	8.06075	5.78819	6.32855	7.65586	7.07649
-1681.66	6.80515	8.35357	6.00056	6.11872	7.42833	6.85732
-1678.39	6.82433	8.03583	5.77088	6.13586	7.44917	6.87637
-1675.12	6.93532	8.10023	5.81849	6.24247	7.56343	6.98703
-1671.86	6.85507	8.14485	5.85169	6.16726	7.47939	6.9071
-1668.59	6.85976	8.12322	5.83678	6.17349	7.48225	6.9118
-1665.32	6.78419	8.27625	5.94859	6.09957	7.40588	6.83645
-1662.05	6.74542	7.99756	5.74337	6.06287	7.36599	6.79788
-1658.78	6.86331	7.94857	5.7091	6.1759	7.48706	6.91532
-1655.52	6.80311	8.18951	5.88697	6.11734	7.42532	6.85527
-1652.25	6.7449	8.23259	5.91668	6.06175	7.36607	6.79734
-1648.98	6.83709	7.89329	5.67099	6.14964	7.4606	6.88916
-1645.71	6.92068	7.93872	5.69992	6.2313	7.54597	6.97255
-1642.44	6.61079	8.10366	5.82336	5.93568	7.22546	6.66372
-1639.18	6.7605	7.992	5.74018	6.07958	7.3792	6.81294
-1635.91	6.73074	7.93526	5.7033	6.05109	7.34864	6.78332
-1632.64	6.69578	7.94192	5.70686	6.02011	7.31049	6.7485
-1629.37	6.61925	7.83113	5.63059	5.94347	7.23473	6.67207
-1626.1	6.93503	8.02151	5.76648	6.24338	7.56213	6.9869
-1622.84	6.73366	7.97164	5.72823	6.05375	7.35175	6.7863
-1619.57	6.61407	7.85223	5.64303	5.94036	7.22744	6.66704
-1616.3	6.70614	7.95977	5.72112	6.02994	7.32139	6.75888
-1613.03	6.58396	8.03463	5.77853	5.91268	7.19557	6.63705
-1609.76	6.73562	7.69019	5.52772	6.05809	7.35159	6.78824
-1606.5	6.75182	7.90296	5.68271	6.0721	7.37	6.80443
-1603.23	6.57084	7.85544	5.64867	5.90107	7.18109	6.62407
-1599.96	6.51239	7.82816	5.63078	5.84664	7.1199	6.56582
-1596.69	6.52721	7.68372	5.51891	5.8592	7.13664	6.58058
-1593.42	6.66551	8.06688	5.80511	5.99093	7.27948	6.71845
-1590.16	6.68594	7.86265	5.6608	6.01046	7.30034	6.73873
-1586.89	6.41538	7.708	5.54332	5.75417	7.01872	6.46909
-1583.62	6.64714	7.85205	5.65189	5.97518	7.25897	6.70005
-1580.35	6.45711	7.69509	5.53306	5.79368	7.06269	6.51073
-1577.08	6.55464	7.87433	5.66439	5.88662	7.16315	6.60798
-1573.82	6.35394	7.8704	5.66763	5.69582	6.95534	6.40789
-1570.55	6.32265	7.66321	5.5133	5.66744	6.92159	6.37682
-1567.28	6.52509	7.61664	5.47897	5.85991	7.13132	6.57859
-1564.01	6.48351	7.61844	5.48008	5.81977	7.0888	6.53706
-1560.74	6.36709	7.74197	5.57406	5.7113	6.96651	6.42107
-1557.48	6.33705	7.82235	5.62911	5.68237	6.9357	6.39118
-1554.21	6.39023	7.5037	5.39645	5.73234	6.99147	6.44411
-1550.94	6.43477	7.74293	5.57069	5.77482	7.03726	6.48856
-1547.67	6.48138	7.571	5.44752	5.81782	7.08664	6.53495
-1544.4	6.34262	7.61838	5.48144	5.68818	6.94094	6.39677
-1541.14	6.41971	7.44111	5.35335	5.75997	7.02222	6.47361
-1537.87	6.43058	7.36149	5.2964	5.77061	7.03286	6.48447
-1534.6	6.29042	7.59	5.4627	5.63987	6.88554	6.34478
-1531.33	6.31284	7.58118	5.45522	5.66092	6.90918	6.36713
-1528.06	6.21832	7.40406	5.32694	5.57262	6.80992	6.27301
-1524.8	6.34191	7.3822	5.31218	5.68914	6.93837	6.39613
-1521.53	6.27534	7.43467	5.35017	5.62634	6.86932	6.32984
-1518.26	6.25443	7.51122	5.40787	5.60565	6.84832	6.3089
-1514.99	6.28461	7.53887	5.42671	5.63653	6.878	6.3391
-1511.72	6.15856	7.40229	5.32812	5.51439	6.74881	6.21338
-1508.46	6.34517	7.44406	5.36092	5.69315	6.94135	6.39944
-1505.19	6.43038	7.49281	5.39682	5.77007	7.03298	6.48425
-1501.92	6.30237	7.34018	5.28409	5.65217	6.89735	6.35675
-1498.65	6.19651	7.35875	5.29791	5.55309	6.78605	6.2513
-1495.38	6.09199	7.26192	5.2307	5.45418	6.67728	6.14708
-1492.12	6.06957	7.41418	5.34144	5.43334	6.6539	6.12479
-1488.85	6.13897	7.33356	5.28418	5.49992	6.72538	6.19405
-1485.58	6.25996	7.28344	5.24363	5.61356	6.85212	6.31456
-1482.31	6.13588	7.32168	5.27509	5.4965	6.72217	6.19091
-1479.04	6.14248	7.16742	5.1605	5.50299	6.72868	6.19751
-1475.78	6.21835	7.35449	5.298	5.57482	6.80807	6.27314
-1472.51	6.09136	7.513	5.40917	5.45557	6.67497	6.14663
-1469.24	6.2981	7.34248	5.28972	5.65149	6.89027	6.35269
-1465.97	6.1833	7.24529	5.22065	5.54204	6.771	6.23824
-1462.7	6.04568	7.08524	5.09947	5.41261	6.62689	6.1011
-1459.44	6.11592	7.05735	5.0811	5.47914	6.69977	6.17113
-1456.17	6.11439	7.16872	5.16797	5.47936	6.6971	6.16968
-1452.9	6.02772	7.28349	5.24924	5.39757	6.60684	6.08331
-1449.63	6.05253	7.14511	5.14635	5.41863	6.63458	6.10791
-1446.36	6.0098	7.1553	5.15688	5.37906	6.58968	6.0654
-1443.1	5.93906	7.23965	5.21892	5.31359	6.51452	5.99499
-1439.83	6.07955	7.0908	5.11275	5.44769	6.65987	6.1349
-1436.56	5.98376	7.33717	5.29217	5.35773	6.55916	6.03919
-1433.29	5.88102	7.24261	5.22051	5.26296	6.4502	5.93693
-1430.02	5.79534	7.08634	5.10987	5.182	6.3603	5.85172
-1426.76	5.86292	7.08401	5.10615	5.24371	6.43315	5.91912
-1423.49	5.77759	7.08939	5.1149	5.16339	6.34354	5.83416
-1420.22	5.81367	7.03468	5.07355	5.19736	6.38157	5.87002
-1416.95	5.86925	7.0538	5.08387	5.25026	6.43941	5.9254
-1413.68	5.90561	6.98818	5.03912	5.28477	6.47662	5.96164
-1410.42	5.88421	6.93716	5.00523	5.26492	6.45425	5.94042
-1407.15	5.84649	7.11415	5.13226	5.22962	6.41493	5.90279
-1403.88	5.73012	6.93597	5.00518	5.1192	6.2934	5.78682
-1400.61	5.88664	6.8661	4.95569	5.26697	6.45737	5.94284
-1397.34	5.92765	6.75986	4.87649	5.30608	6.49973	5.9837
-1394.08	5.80362	6.8126	4.91409	5.19003	6.36881	5.86015
-1390.81	5.82339	6.73324	4.858	5.20891	6.38921	5.87986
-1387.54	5.59561	6.76023	4.87547	4.9952	6.15069	5.65275
-1384.27	5.86119	6.84381	4.93539	5.2453	6.4287	5.91758
-1381	5.69877	6.86199	4.94861	5.09033	6.26027	5.75561
-1377.74	5.57311	6.88136	4.96619	4.97444	6.12645	5.63042
-1374.47	5.72213	6.80641	4.91052	5.11421	6.28306	5.779
-1371.2	5.6723	6.66113	4.80323	5.06863	6.22978	5.72934
-1367.93	5.67053	6.85058	4.94441	5.06751	6.2274	5.72765
-1364.66	5.59704	6.86718	4.95549	4.99942	6.14968	5.65432
-1361.4	5.64191	6.76484	4.88314	5.04012	6.19743	5.69903
-1358.13	5.55188	6.79319	4.90518	4.957	6.10217	5.60937
-1354.86	5.64886	6.51281	4.69536	5.04553	6.20593	5.70596
-1351.59	5.74666	6.76539	4.88516	5.14019	6.30588	5.8036
-1348.32	5.52683	6.63707	4.78794	4.9309	6.07792	5.58445
-1345.06	5.72835	6.49709	4.68785	5.12331	6.287	5.78527
-1341.79	5.59753	6.67561	4.81921	5.00048	6.14934	5.65467
-1338.52	5.56518	6.58795	4.75533	4.97242	6.11345	5.62261
-1335.25	5.39116	6.59854	4.76482	4.80825	5.93137	5.44928
-1331.98	5.48307	6.48961	4.6838	4.89498	6.02759	5.54091
-1328.72	5.4824	6.59836	4.76374	4.89601	6.02565	5.54037
-1325.45	5.52661	6.46884	4.66855	4.93587	6.07346	5.58434
-1322.18	5.43373	6.5413	4.72301	4.84922	5.97538	5.49179
-1318.91	5.47117	6.67496	4.82596	4.88346	6.01552	5.52916
-1315.64	5.34632	6.42384	4.63904	4.76612	5.88456	5.40471
-1312.38	5.45652	6.6589	4.81422	4.8707	5.99896	5.51458
-1309.11	5.49651	6.52815	4.71655	4.90712	6.04249	5.55438
-1305.84	5.4462	6.47619	4.68144	4.86037	5.98906	5.50425
-1302.57	5.31861	6.26552	4.52465	4.74219	5.85363	5.37714
-1299.3	5.43807	6.32843	4.57268	4.85302	5.97987	5.49617
-1296.04	5.4179	6.38409	4.61806	4.83602	5.95668	5.47611
-1292.77	5.2596	6.39554	4.62025	4.68669	5.79134	5.31825
-1289.5	5.37863	6.3209	4.56758	4.79848	5.91661	5.437
-1286.23	5.34675	6.33677	4.58059	4.76933	5.88187	5.40522
-1282.96	5.29567	6.22023	4.49553	4.72053	5.82977	5.35429
-1279.7	5.21264	6.35167	4.59288	4.64435	5.741	5.27163
-1276.43	5.2539	6.39685	4.62296	4.68232	5.7851	5.31272
-1273.16	5.22649	6.35969	4.59555	4.65811	5.7549	5.28542
-1269.89	5.31688	6.18941	4.47347	4.74191	5.85076	5.3755
-1266.62	5.22997	6.34335	4.5851	4.66139	5.75789	5.28886
-1263.36	5.23878	6.31003	4.56085	4.67062	5.76685	5.29782
-1260.09	5.23763	6.13141	4.42817	4.66746	5.76705	5.29655
-1256.82	5.19159	6.25286	4.52064	4.62668	5.71696	5.25074
-1253.55	5.31618	6.21999	4.49793	4.74313	5.84804	5.37493
-1250.28	5.15471	6.17128	4.46025	4.59222	5.67798	5.21394
-1247.02	5.17519	6.06239	4.38351	4.61143	5.69971	5.23439
-1243.75	5.11998	6.09207	4.40308	4.56144	5.64005	5.17943
-1240.48	5.09989	6.05235	4.37597	4.54327	5.6183	5.1594
-1237.21	5.15249	6.15842	4.4535	4.59076	5.67515	5.21183
-1233.94	5.05228	6.07749	4.39264	4.49836	5.5686	5.11187
-1230.68	5.05398	6.10801	4.42054	4.49935	5.57064	5.11358
-1227.41	5.05404	6.09178	4.40704	4.50075	5.56946	5.11378
-1224.14	5.08614	6.02726	4.3612	4.53026	5.60417	5.14581
-1220.87	5.02894	6.17091	4.46591	4.47671	5.5433	5.08875
-1217.6	5.06316	5.97907	4.32347	4.51039	5.57806	5.12292
-1214.34	4.9791	6.03633	4.36698	4.43367	5.48803	5.03917
-1211.07	4.841	5.92554	4.28669	4.3077	5.33919	4.90117
-1207.8	4.71413	5.92964	4.28951	4.19072	5.20362	4.77435
-1204.53	4.67034	6.00135	4.34257	4.15113	5.15614	4.73081
-1201.26	4.79874	5.86566	4.24022	4.26984	5.29222	4.85891
-1198	4.83646	5.85974	4.23754	4.30472	5.33322	4.89663
-1194.73	4.79511	5.88393	4.25888	4.2663	5.28937	4.8557
-1191.46	4.67564	5.89044	4.26355	4.15582	5.16215	4.73674
-1188.19	4.74149	5.86556	4.24358	4.21489	5.23426	4.80229
-1184.92	4.74972	5.88232	4.26068	4.22286	5.24234	4.81064
-1181.66	4.72602	5.76362	4.17548	4.20051	5.21759	4.78705
-1178.39	4.83226	5.61794	4.07234	4.29863	5.33117	4.89294
-1175.12	4.68217	5.48262	3.96858	4.16021	5.17091	4.74341
-1171.85	4.74048	5.38999	3.90269	4.21249	5.23466	4.80142
-1168.58	4.77825	5.57017	4.03545	4.25016	5.27252	4.8392
-1165.32	4.80764	5.59472	4.05092	4.2762	5.30461	4.86844
-1162.05	4.68516	5.56667	4.03252	4.16375	5.17367	4.74639
-1158.78	4.82812	5.424	3.92882	4.29563	5.326	4.88893
-1155.51	4.66963	5.51087	3.99005	4.14976	5.1567	4.73097
-1152.24	4.7295	5.49538	3.98109	4.20459	5.22092	4.79056
-1148.98	4.64127	5.49231	3.97779	4.12266	5.12701	4.7027
-1145.71	4.65471	5.60015	4.05473	4.1349	5.14186	4.71608
-1142.44	4.74234	5.43724	3.93759	4.2172	5.23368	4.80349
-1139.17	4.70152	5.49558	3.9789	4.1793	5.19075	4.76269
-1135.9	4.62829	5.56118	4.03176	4.1115	5.11288	4.68982
-1132.64	4.73499	5.57709	4.04034	4.21096	5.22561	4.79612
-1129.37	4.61083	5.43402	3.93522	4.09568	5.09384	4.67241
-1126.1	4.58353	5.61335	4.06892	4.07011	5.0652	4.6452
-1122.83	4.59292	5.43118	3.93413	4.07968	5.07411	4.65446
-1119.56	4.4824	5.49272	3.97716	3.97844	4.95584	4.54448
-1116.3	4.54639	5.41864	3.92568	4.03696	5.02472	4.60824
-1113.03	4.51345	5.43017	3.9331	4.00737	4.98856	4.57547
-1109.76	4.42358	5.50775	3.9933	3.92337	4.89367	4.48586
-1106.49	4.50427	5.48184	3.97168	3.99822	4.97924	4.56631
-1103.22	4.41282	5.38556	3.90224	3.91421	4.88155	4.47507
-1099.96	4.35094	5.49184	3.98243	3.85838	4.81449	4.41346
-1096.69	4.44704	5.33583	3.86752	3.94713	4.91688	4.50931
-1093.42	4.42927	5.3099	3.8466	3.93009	4.89847	4.49159
-1090.15	4.36803	5.34652	3.87337	3.87438	4.83248	4.43063
-1086.88	4.37864	5.22675	3.78866	3.88358	4.84456	4.44119
-1083.62	4.2996	5.28102	3.82676	3.81292	4.75793	4.36244
-1080.35	4.34853	5.23532	3.796	3.85617	4.81174	4.4111
-1077.08	4.33126	5.12967	3.71539	3.84106	4.79256	4.39403
-1073.81	4.2869	5.22586	3.78776	3.79977	4.74592	4.34976
-1070.54	4.30107	5.10623	3.69944	3.8142	4.75959	4.36398
-1067.28	4.29162	5.02447	3.64072	3.80541	4.74965	4.35455
-1064.01	4.26204	5.16233	3.74207	3.77906	4.71704	4.32506
-1060.74	4.26203	5.13063	3.71999	3.77796	4.71809	4.32501
-1057.47	4.25815	5.05097	3.66301	3.77574	4.71284	4.32114
-1054.2	4.29003	5.08787	3.68906	3.80559	4.74649	4.35296
-1050.94	4.21919	5.00241	3.62841	3.74039	4.67084	4.28244
-1047.67	4.16187	5.0617	3.66923	3.68813	4.60891	4.22533
-1044.4	4.18274	5.03682	3.65195	3.70763	4.6309	4.24602
-1041.13	4.07215	4.98742	3.61484	3.60542	4.51315	4.13584
-1037.86	4.15325	4.99603	3.62363	3.67963	4.6	4.21672
-1034.6	4.10995	4.98641	3.61689	3.64024	4.55357	4.17363
-1031.33	4.0767	4.94228	3.58555	3.60935	4.51803	4.14047
-1028.06	4.09193	4.92756	3.57316	3.6232	4.53445	4.15559
-1024.79	4.00779	4.94766	3.58959	3.54728	4.4433	4.07181
-1021.52	4.09917	4.99325	3.62417	3.63163	4.54065	4.16284
-1018.26	4.00886	4.90209	3.55882	3.54832	4.44388	4.07294
-1014.99	3.96922	4.82518	3.50167	3.51231	4.40129	4.03333
-1011.72	3.97577	4.84872	3.51936	3.51995	4.40701	4.03995
-1008.45	4.00324	4.74601	3.44244	3.54481	4.43701	4.0673
-1005.18	3.92992	4.81146	3.49121	3.47672	4.35866	3.9942
-1001.92	3.98817	4.78478	3.47172	3.5305	4.42114	4.05226
-998.648	3.88062	4.7274	3.43001	3.43215	4.30537	3.94509
-995.38	3.88297	4.74214	3.44058	3.43481	4.30743	3.94744
-992.112	3.85652	4.6504	3.37354	3.41105	4.27867	3.92108
-988.844	3.83657	4.74923	3.44814	3.39189	4.25811	3.90121
-985.576	3.83806	4.65936	3.38174	3.394	4.25859	3.90278
-982.308	3.86209	4.61323	3.34749	3.41636	4.2845	3.92673
-979.04	3.80972	4.6211	3.35643	3.36899	4.22759	3.87449
-975.772	3.87236	4.63542	3.36717	3.42629	4.29462	3.93687
-972.504	3.74594	4.55802	3.30956	3.31101	4.15875	3.81095
-969.236	3.76009	4.64384	3.37124	3.32314	4.17453	3.82511
-965.968	3.73743	4.49084	3.25902	3.30345	4.14939	3.80247
-962.7	3.66492	4.50281	3.26953	3.23633	4.07201	3.73023
-959.432	3.67306	4.459	3.23607	3.24595	4.079	3.7384
-956.164	3.68413	4.44678	3.22714	3.25522	4.0916	3.74943
-952.896	3.6054	4.43454	3.21948	3.18382	4.00632	3.67106
-949.628	3.58944	4.46622	3.24319	3.16907	3.98933	3.65496
-946.36	3.63131	4.42478	3.21359	3.20862	4.03307	3.69668
-943.092	3.5594	4.50895	3.27705	3.14192	3.95634	3.6251
-939.824	3.53	4.36339	3.17001	3.11571	3.92438	3.59591
-936.556	3.55057	4.36775	3.17162	3.13507	3.94594	3.61635
-933.288	3.50403	4.3285	3.1425	3.09251	3.89601	3.56996
-930.02	3.48706	4.26715	3.09733	3.07765	3.87695	3.55305
-926.752	3.46903	4.2664	3.10074	3.06171	3.85711	3.53506
-923.484	3.48354	4.28013	3.10921	3.07513	3.87249	3.54949
-920.216	3.40488	4.18802	3.04182	3.00226	3.78849	3.47118
-916.948	3.36835	4.17265	3.03125	2.97002	3.74834	3.43485
-913.68	3.37303	4.20852	3.05881	2.97465	3.75308	3.4394
-910.412	3.35978	4.13316	3.00188	2.96258	3.73867	3.42624
-907.144	3.31338	4.09367	2.97334	2.91989	3.68891	3.38006
-903.876	3.34723	4.11466	2.99071	2.95238	3.72408	3.4137
-900.608	3.28908	4.06132	2.95001	2.89898	3.66164	3.35587
-897.34	3.28485	4.05795	2.94905	2.89496	3.65723	3.35157
-894.072	3.2479	4.0188	2.92179	2.86117	3.61694	3.3148
-890.804	3.21774	4.03416	2.93178	2.83383	3.58449	3.28465
-887.536	3.22096	3.95248	2.8705	2.838	3.58695	3.28793
-884.268	3.17955	3.91207	2.84164	2.80028	3.54218	3.24669
-881	3.15039	3.89855	2.83288	2.77499	3.50969	3.21757
-877.732	3.15621	3.89455	2.82899	2.77992	3.51605	3.22342
-874.464	3.11964	3.84122	2.78967	2.74687	3.47648	3.18703
-871.196	3.11482	3.90045	2.83608	2.74226	3.47152	3.18216
-867.928	3.05261	3.80625	2.76582	2.68721	3.40262	3.1202
-864.66	3.03677	3.81392	2.7705	2.6726	3.38559	3.10443
-861.392	3.01298	3.75702	2.72902	2.65023	3.36051	3.08079
-858.124	3.00802	3.73482	2.7116	2.64641	3.35449	3.07577
-854.856	2.96166	3.74432	2.72167	2.60466	3.30374	3.02961
-851.588	2.99671	3.6984	2.68693	2.63649	3.34206	3.06453
-848.32	2.94079	3.65649	2.65883	2.58621	3.2809	3.00887
-845.052	2.90334	3.65303	2.65557	2.55327	3.23949	2.97135
-841.784	2.89721	3.6205	2.63148	2.54705	3.23338	2.96544
-838.516	2.87433	3.62502	2.63571	2.52718	3.20781	2.94254
-835.248	2.81805	3.51845	2.5576	2.47569	3.14705	2.88662
-831.98	2.8163	3.52684	2.5637	2.47538	3.14395	2.88461
-828.712	2.81726	3.48976	2.5357	2.47648	3.14486	2.88561
-825.444	2.75411	3.49256	2.53896	2.41965	3.07566	2.82273
-822.176	2.76658	3.44115	2.50091	2.43106	3.0892	2.83504
-818.908	2.687	3.47611	2.52725	2.35987	3.00202	2.75595
-815.64	2.68297	3.42595	2.49086	2.35606	2.99764	2.75191
-812.372	2.66613	3.36203	2.4447	2.34117	2.97915	2.73501
-809.104	2.65989	3.3558	2.43929	2.33569	2.9722	2.72891
-805.836	2.61285	3.3288	2.42083	2.2938	2.92028	2.68193
-802.568	2.57721	3.26518	2.37267	2.261	2.88192	2.6465
-799.3	2.55332	3.26818	2.37681	2.24037	2.85491	2.6226
-796.032	2.55299	3.27413	2.3808	2.23952	2.85525	2.62242
-792.764	2.55445	3.1897	2.32006	2.24164	2.85598	2.62361
-789.496	2.50259	3.19918	2.32651	2.19571	2.79886	2.57208
-786.228	2.46016	3.11786	2.26744	2.15713	2.75277	2.52997
-782.96	2.43672	3.11207	2.26352	2.13634	2.72675	2.50659
-779.692	2.40532	3.09351	2.25063	2.10851	2.69214	2.47529
-776.424	2.34981	3.08731	2.2453	2.05879	2.63102	2.41992
-773.156	2.35309	3.02438	2.20008	2.0623	2.63411	2.42333
-769.888	2.32896	2.9818	2.1677	2.04088	2.60758	2.399
-766.62	2.31795	2.96303	2.15578	2.03153	2.59501	2.38795
-763.352	2.26149	2.9696	2.15917	1.97975	2.53396	2.33205
-760.084	2.23556	2.9538	2.14851	1.95764	2.50473	2.30604
-756.816	2.19301	2.8966	2.10708	1.91957	2.45806	2.26369
-753.548	2.21354	2.85297	2.07438	1.9384	2.48002	2.28392
-750.28	2.17053	2.82001	2.05106	1.90019	2.43252	2.24123
-747.012	2.12103	2.79381	2.03218	1.85621	2.37771	2.19179
-743.744	2.11651	2.72541	1.98189	1.85221	2.37282	2.18707
-740.476	2.07342	2.72872	1.98545	1.81448	2.32475	2.1442
-737.208	2.02814	2.70326	1.96701	1.77375	2.27512	2.0994
-733.94	2.04206	2.68601	1.95513	1.78654	2.29011	2.11311
-730.672	1.99166	2.62245	1.90682	1.74164	2.23443	2.06272
-727.404	1.93983	2.59864	1.89098	1.69523	2.17752	2.0113
-724.136	1.91245	2.5409	1.848	1.67155	2.14675	1.98416
-720.868	1.90458	2.56572	1.86736	1.66452	2.13805	1.97609
-717.6	1.88	2.51705	1.832	1.64276	2.11085	1.95164
-714.332	1.84779	2.45238	1.78432	1.61438	2.07502	1.91957
-711.064	1.80385	2.44687	1.78143	1.57493	2.02664	1.87607
-707.796	1.78309	2.39231	1.74121	1.55717	2.0032	1.85521
-704.528	1.76348	2.3587	1.71662	1.53972	1.98159	1.83563
-701.26	1.73373	2.36562	1.72169	1.51407	1.94784	1.80567
-697.992	1.69608	2.31034	1.68209	1.48042	1.90637	1.76848
-694.724	1.66351	2.24673	1.63424	1.45212	1.86986	1.7357
-691.456	1.63666	2.21518	1.61219	1.42787	1.84041	1.70911
-688.188	1.59741	2.20333	1.60356	1.39343	1.79669	1.66996
-684.92	1.57634	2.17472	1.58314	1.3747	1.77327	1.64897
-681.652	1.54149	2.14448	1.56108	1.34415	1.73435	1.61428
-678.384	1.51808	2.08831	1.51942	1.32375	1.70808	1.59074
-675.116	1.46958	2.06967	1.50685	1.28084	1.65418	1.54283
-671.848	1.4523	2.0444	1.4879	1.26577	1.63483	1.52541
-668.58	1.43713	2.00683	1.46177	1.25221	1.61801	1.51023
-665.312	1.39011	1.97003	1.43436	1.21077	1.56579	1.46378
-662.044	1.37675	1.92474	1.40192	1.19968	1.55007	1.44963
-658.776	1.33931	1.89544	1.37951	1.16637	1.50879	1.41274
-655.508	1.30209	1.84741	1.34452	1.13364	1.46717	1.37561
-652.24	1.28768	1.8268	1.32973	1.12101	1.45096	1.36136
-648.972	1.26897	1.78824	1.30182	1.10492	1.4298	1.34221
-645.704	1.21419	1.75171	1.27515	1.05637	1.3691	1.28827
-642.436	1.23239	1.70032	1.23788	1.07238	1.38938	1.30631
-639.168	1.22291	1.67697	1.22108	1.06504	1.3779	1.29606
-635.9	1.16597	1.65988	1.2084	1.01431	1.31497	1.24004
-632.632	1.13169	1.60745	1.16996	0.98399	1.27676	1.20604
-629.364	1.12643	1.59447	1.16148	0.97978	1.27053	1.20046
-626.096	1.09595	1.54901	1.1278	0.95292	1.23657	1.17028
-622.828	1.06832	1.5056	1.09632	0.92897	1.20541	1.14274
-619.56	1.04975	1.48927	1.08452	0.91239	1.1848	1.1242
-616.292	0.97157	1.46777	1.06974	0.84429	1.09693	1.04612
-613.024	1.01383	1.40123	1.02037	0.88098	1.1445	1.08843
-609.756	0.99147	1.42583	1.03799	0.86149	1.11927	1.06623
-606.488	0.92188	1.41255	1.0293	0.80103	1.04096	0.99667
-603.22	0.95904	1.34773	0.98132	0.83372	1.08249	1.0331
-599.952	0.89195	1.30701	0.95119	0.7748	1.00745	0.96683
-596.684	0.84808	1.29693	0.94484	0.73639	0.95826	0.92325
-593.416	0.86735	1.26667	0.92212	0.75334	0.97976	0.94206
-590.148	0.83388	1.23366	0.89831	0.72407	0.94211	0.90898
-586.88	0.7871	1.21273	0.88324	0.68309	0.8897	0.86239
-583.612	0.74872	1.12078	0.81646	0.64967	0.84651	0.82426
-580.344	0.76256	1.1694	0.85163	0.66208	0.86175	0.83723
-577.076	0.70674	1.14141	0.83076	0.61312	0.79926	0.78244
-573.808	0.67854	1.06307	0.77429	0.58848	0.76756	0.75428
-570.54	0.64815	1.10922	0.80855	0.56231	0.73303	0.72344
-567.272	0.62669	1.02617	0.74758	0.54337	0.70906	0.70248
-564.004	0.62466	0.97815	0.71245	0.54159	0.70682	0.70047
-560.736	0.59141	0.99972	0.72865	0.51268	0.6693	0.66705
-557.468	0.58426	0.9607	0.7002	0.50643	0.6613	0.66012
-554.2	0.56201	0.90292	0.65753	0.48731	0.63595	0.63775
-550.932	0.55068	0.86278	0.6283	0.47738	0.62322	0.62639
-547.664	0.52113	0.87768	0.63983	0.45159	0.58999	0.59701
-544.396	0.50497	0.81507	0.59366	0.43751	0.57181	0.58106
-541.128	0.47933	0.78058	0.56868	0.41531	0.54273	0.55516
-537.86	0.4629	0.74392	0.54214	0.40119	0.52406	0.53825
-534.592	0.45454	0.72061	0.5249	0.394	0.51456	0.52986
-531.324	0.43496	0.7189	0.52365	0.37678	0.49263	0.51102
-528.056	0.43152	0.67884	0.4945	0.37393	0.48864	0.507
-524.788	0.40754	0.66843	0.48678	0.35303	0.46161	0.48361
-521.52	0.40281	0.64506	0.47018	0.34898	0.45622	0.47848
-518.252	0.37711	0.63222	0.46091	0.32658	0.42724	0.45319
-514.984	0.36849	0.59754	0.43546	0.31925	0.41735	0.44416
-511.716	0.34857	0.57888	0.42168	0.30181	0.395	0.42481
-508.448	0.3449	0.55093	0.40155	0.29863	0.39083	0.42118
-505.18	0.32671	0.53211	0.3881	0.28283	0.37028	0.40255
-501.912	0.32428	0.52148	0.38029	0.28073	0.36752	0.40034
-498.644	0.31048	0.49901	0.36364	0.26876	0.35192	0.38672
-495.376	0.29783	0.49583	0.36167	0.25782	0.33758	0.37408
-492.108	0.28394	0.46644	0.34007	0.24578	0.32184	0.36
-488.84	0.27715	0.46234	0.33732	0.23991	0.31415	0.35333
-485.572	0.26815	0.43307	0.31571	0.23205	0.30403	0.34476
-482.304	0.26055	0.42302	0.30861	0.22557	0.29529	0.33665
-479.036	0.25279	0.40098	0.29232	0.21878	0.28659	0.32879
-475.768	0.24372	0.3963	0.28898	0.21092	0.27632	0.32013
-472.5	0.23066	0.37582	0.27413	0.19953	0.26162	0.30731
-469.232	0.23225	0.37199	0.27127	0.20098	0.26332	0.30852
-465.964	0.22123	0.35632	0.25979	0.19143	0.25087	0.29736
-462.696	0.22096	0.34276	0.24994	0.19124	0.2505	0.29684
-459.428	0.21096	0.3258	0.23759	0.18259	0.23918	0.28717
-456.16	0.20348	0.31879	0.23252	0.17607	0.23072	0.27981
-452.892	0.20056	0.30811	0.22468	0.17357	0.2274	0.27675
-449.624	0.19262	0.29975	0.2186	0.16671	0.2184	0.2686
-446.356	0.19065	0.2908	0.21217	0.16497	0.21619	0.26657
-443.088	0.17972	0.28053	0.20456	0.15548	0.20384	0.25607
-439.82	0.17659	0.26621	0.19403	0.15276	0.2003	0.25289
-436.552	0.1703	0.26605	0.19404	0.14732	0.19316	0.24677
-433.284	0.16616	0.25398	0.18528	0.14374	0.18848	0.24261
-430.016	0.16623	0.25439	0.18563	0.14389	0.18846	0.24146
-426.748	0.15671	0.24232	0.17675	0.13552	0.17777	0.23352
-423.48	0.15424	0.23336	0.17019	0.13341	0.17497	0.23071
-420.212	0.15289	0.23097	0.16851	0.13226	0.17344	0.22944
-416.944	0.15231	0.22149	0.16159	0.1318	0.17273	0.22784
-413.676	0.14351	0.21898	0.15981	0.12411	0.1628	0.22002
-410.408	0.1418	0.20641	0.15056	0.12265	0.16086	0.21837
-407.14	0.14063	0.20289	0.14798	0.12164	0.15954	0.21705
-403.872	0.13763	0.19571	0.14275	0.11906	0.1561	0.21367
-400.604	0.13444	0.19136	0.13955	0.11628	0.15252	0.21087
-397.336	0.13313	0.19119	0.13963	0.11517	0.15101	0.20907
-394.068	0.13158	0.17998	0.13119	0.11384	0.14924	0.20754
-390.8	0.12583	0.17748	0.12948	0.10883	0.14275	0.20208
-387.532	0.12672	0.17593	0.12835	0.10963	0.14373	0.20252
-384.264	0.12722	0.1747	0.12757	0.11007	0.14429	0.20282
-380.996	0.12428	0.1653	0.12055	0.1075	0.14097	0.20035
-377.728	0.12016	0.16309	0.11893	0.10393	0.13632	0.1964
-374.46	0.11927	0.16214	0.11834	0.10317	0.13529	0.19546
-371.192	0.11751	0.1587	0.11583	0.10166	0.13329	0.19349
-367.924	0.11565	0.15525	0.11329	0.10003	0.13122	0.19212
-364.656	0.11237	0.15358	0.11213	0.0972	0.12748	0.18866
-361.388	0.11408	0.15097	0.11018	0.09867	0.12943	0.19007
-358.12	0.11079	0.1454	0.1061	0.09583	0.12568	0.18703
-354.852	0.11234	0.1459	0.1065	0.09718	0.12743	0.18806
-351.584	0.10978	0.14687	0.10727	0.09496	0.12454	0.18551
-348.316	0.10726	0.1431	0.10442	0.0928	0.12167	0.18307
-345.048	0.10731	0.13883	0.10127	0.09285	0.12171	0.18289
-341.78	0.10427	0.13784	0.10059	0.09018	0.11829	0.18052
-338.512	0.10266	0.13563	0.09902	0.08881	0.11645	0.17874
-335.244	0.1031	0.13372	0.09755	0.08917	0.11697	0.17922
-331.976	0.10358	0.13014	0.09496	0.08961	0.11749	0.17909
-328.708	0.10065	0.13263	0.09684	0.08706	0.11418	0.1764
-325.44	0.09661	0.12828	0.09364	0.08356	0.1096	0.173
-322.172	0.0972	0.12944	0.09452	0.08407	0.11028	0.17341
-318.904	0.09729	0.12667	0.09249	0.08414	0.1104	0.17345
-315.636	0.09738	0.12417	0.09067	0.08425	0.11046	0.17318
-312.368	0.09434	0.12411	0.09063	0.08161	0.10701	0.17026
-309.1	0.09309	0.12098	0.08835	0.08051	0.10563	0.16918
-305.832	0.09081	0.1185	0.08647	0.07853	0.10304	0.16734
-302.564	0.09263	0.11952	0.08724	0.08014	0.10507	0.16846
-299.296	0.09278	0.12019	0.08778	0.08025	0.10525	0.16839
-296.028	0.0888	0.11609	0.08478	0.07678	0.10077	0.16508
-292.76	0.09049	0.1118	0.08157	0.07829	0.10265	0.16589
-289.492	0.0912	0.11246	0.08206	0.07889	0.10346	0.16679
-286.224	0.0889	0.11289	0.0824	0.07692	0.10082	0.16426
-282.956	0.08328	0.1125	0.08214	0.07201	0.09451	0.15965
-279.688	0.08518	0.10896	0.07952	0.07369	0.09663	0.16093
-276.42	0.08523	0.10766	0.07856	0.07373	0.09668	0.16128
-273.152	0.08631	0.1049	0.0765	0.07467	0.0979	0.16191
-269.884	0.08364	0.10712	0.07817	0.07234	0.09489	0.15942
-266.616	0.08376	0.10791	0.07878	0.07246	0.09502	0.15945
-263.348	0.08431	0.10315	0.07527	0.07293	0.09563	0.15978
-260.08	0.07841	0.10509	0.07674	0.06778	0.089	0.15524
-256.812	0.0795	0.10524	0.07686	0.06874	0.09023	0.15567
-253.544	0.07874	0.10291	0.07515	0.0681	0.08935	0.15466
-250.276	0.07499	0.09654	0.07045	0.06485	0.0851	0.15102
-247.008	0.07815	0.09827	0.07173	0.06759	0.08866	0.15395
-243.74	0.07962	0.09845	0.07186	0.06886	0.09033	0.15541
-240.472	0.07897	0.10052	0.0734	0.06829	0.0896	0.15469
-237.204	0.07594	0.09644	0.07043	0.06569	0.08615	0.15164
-233.936	0.07617	0.0968	0.07066	0.06586	0.08645	0.15172
-230.668	0.07374	0.09733	0.07108	0.06376	0.08369	0.14966
-227.4	0.07295	0.09046	0.06598	0.06305	0.0828	0.14909
-224.132	0.07107	0.09165	0.06689	0.06143	0.08069	0.14758
-220.864	0.07284	0.09072	0.06621	0.06299	0.08266	0.14897
-217.596	0.07407	0.08641	0.06306	0.06406	0.08405	0.14989
-214.328	0.07227	0.09039	0.06598	0.06249	0.08201	0.14815
-211.06	0.07156	0.09203	0.06721	0.06188	0.08121	0.1473
-207.792	0.07357	0.09093	0.06637	0.06364	0.08347	0.1491
-204.524	0.07339	0.08827	0.06441	0.06348	0.08326	0.14899
-201.256	0.07196	0.0875	0.06382	0.06224	0.08163	0.14773
-197.988	0.0692	0.08469	0.06175	0.05985	0.0785	0.1447
-194.72	0.06752	0.08468	0.06173	0.05839	0.07662	0.14327
-191.452	0.06538	0.08243	0.0601	0.05651	0.07421	0.14129
-188.184	0.06663	0.08433	0.06154	0.05762	0.0756	0.14231
-184.916	0.06723	0.08596	0.06275	0.05813	0.07629	0.14297
-181.648	0.07128	0.08323	0.06073	0.06167	0.08084	0.14658
-178.38	0.06964	0.08261	0.06029	0.06024	0.07902	0.14542
-175.112	0.0703	0.08464	0.06179	0.0608	0.07976	0.1458
-171.844	0.07187	0.08479	0.06192	0.06218	0.08152	0.14698
-168.576	0.06825	0.08266	0.06033	0.05903	0.07743	0.144
-165.308	0.06905	0.07926	0.05788	0.05974	0.07833	0.14452
-162.04	0.06784	0.07702	0.0562	0.05866	0.07698	0.14365
-158.772	0.07046	0.07475	0.05455	0.06097	0.07991	0.14543
-155.504	0.06763	0.07646	0.05579	0.0585	0.07673	0.14346
-152.236	0.06542	0.07693	0.05616	0.0566	0.0742	0.14079
-148.968	0.065	0.08234	0.06015	0.05622	0.07375	0.14068
-145.7	0.06358	0.07987	0.0583	0.05497	0.07215	0.13962
-142.432	0.06452	0.08096	0.05911	0.05579	0.07321	0.14054
-139.164	0.06551	0.0825	0.06025	0.05667	0.07432	0.14079
-135.896	0.06381	0.07928	0.05789	0.05517	0.07241	0.13962
-132.628	0.06279	0.07982	0.05828	0.05431	0.07124	0.1387
-129.36	0.06269	0.07826	0.05714	0.05422	0.07113	0.13834
-126.092	0.06254	0.08113	0.05926	0.05409	0.07096	0.13872
-122.824	0.06477	0.07808	0.05702	0.05604	0.07347	0.14003
-119.556	0.06485	0.07575	0.05532	0.05611	0.07357	0.14023
-116.288	0.0624	0.0748	0.05462	0.05397	0.0708	0.13845
-113.02	0.06246	0.07327	0.05348	0.05403	0.07086	0.13815
-109.752	0.0629	0.0746	0.05443	0.05442	0.07134	0.13834
-106.484	0.06346	0.07582	0.05536	0.0549	0.072	0.13872
-103.216	0.06307	0.07343	0.0536	0.05457	0.07154	0.13873
-99.948	0.06225	0.07269	0.05307	0.05386	0.0706	0.13767
-96.68	0.06085	0.07221	0.0527	0.05263	0.06905	0.13672
-93.412	0.06092	0.07179	0.05239	0.0527	0.0691	0.13658
-90.144	0.06093	0.07504	0.05483	0.05272	0.06911	0.13623
-86.876	0.0604	0.07487	0.05469	0.05224	0.06853	0.13622
-83.608	0.05776	0.07187	0.05245	0.04995	0.06555	0.13433
-80.34	0.06225	0.07234	0.05284	0.05386	0.07061	0.13739
-77.072	0.06187	0.07278	0.05316	0.05354	0.07017	0.13721
-73.804	0.0631	0.07311	0.05341	0.05461	0.07156	0.13786
-70.536	0.06006	0.07282	0.05318	0.05197	0.06812	0.13513
-67.268	0.05979	0.07196	0.05256	0.05172	0.06783	0.13502
-64	0.06047	0.07051	0.05149	0.0523	0.06861	0.13596
-60.732	0.05953	0.07052	0.0515	0.05149	0.06754	0.13521
-57.464	0.06083	0.07076	0.05169	0.05263	0.06899	0.13597
-54.196	0.05942	0.06996	0.05108	0.05143	0.06738	0.13437
-50.928	0.0613	0.0668	0.04874	0.05304	0.06953	0.13628
-47.66	0.05971	0.07211	0.05268	0.05167	0.06772	0.13483
-44.392	0.06212	0.07138	0.05214	0.05377	0.07044	0.13654
-41.124	0.05869	0.07301	0.05333	0.05079	0.06657	0.13351
-37.856	0.0588	0.0691	0.05049	0.05087	0.06671	0.13421
-34.588	0.05877	0.06925	0.05057	0.05085	0.06667	0.13416
-31.32	0.06275	0.06982	0.05099	0.05431	0.07116	0.13697
-28.052	0.06121	0.06887	0.05029	0.05298	0.06941	0.13569
-24.784	0.06035	0.07021	0.05128	0.05223	0.06845	0.13526
-21.516	0.05914	0.06866	0.05014	0.05116	0.06709	0.13437
-18.248	0.05879	0.07058	0.05157	0.05087	0.06667	0.13382
-14.98	0.05989	0.06895	0.05037	0.05182	0.06793	0.13471
-11.712	0.05957	0.07162	0.05234	0.05156	0.06754	0.13432
-8.444	0.05875	0.06771	0.04948	0.05082	0.06665	0.13403
-5.176	0.06184	0.06763	0.0494	0.05354	0.07012	0.13631
-1.908	0.06001	0.06744	0.04925	0.05193	0.06806	0.13498
1.36	0.05897	0.07256	0.05307	0.05102	0.06688	0.13406
4.628	0.05656	0.07084	0.05178	0.04893	0.06417	0.13231
7.896	0.05511	0.06976	0.05099	0.04767	0.06253	0.13113
11.164	0.06069	0.06842	0.04998	0.05253	0.06881	0.13498
14.432	0.05999	0.06776	0.04952	0.0519	0.06805	0.13495
17.7	0.0587	0.06984	0.05107	0.0508	0.06658	0.13353
20.968	0.05867	0.0688	0.05026	0.05077	0.06655	0.13363
24.236	0.06004	0.068	0.0497	0.05197	0.06808	0.13472
27.504	0.05828	0.07179	0.05248	0.05044	0.06611	0.13317
30.772	0.05873	0.06956	0.05082	0.05082	0.06661	0.13357
34.04	0.06132	0.06836	0.04996	0.05308	0.06954	0.13575
37.308	0.061	0.06521	0.0476	0.05279	0.06917	0.13542
40.576	0.06114	0.06398	0.0467	0.05292	0.06932	0.13543
43.844	0.06099	0.07004	0.0512	0.05277	0.06918	0.13562
47.112	0.05874	0.06947	0.05077	0.05082	0.06663	0.13375
50.38	0.06	0.0679	0.04962	0.05193	0.06803	0.13442
53.648	0.05818	0.06795	0.04965	0.05034	0.06599	0.13323
56.916	0.05849	0.06954	0.05083	0.05061	0.06635	0.1338
60.184	0.0604	0.06775	0.04953	0.05227	0.06851	0.13509
63.452	0.06052	0.06791	0.04963	0.05238	0.06864	0.13542
66.72	0.06112	0.07061	0.05162	0.05289	0.06931	0.13588
69.988	0.06085	0.0705	0.05155	0.05267	0.06901	0.13552
73.256	0.06353	0.07036	0.05143	0.055	0.07203	0.13773
76.524	0.06093	0.0703	0.05141	0.05273	0.06911	0.13579
79.792	0.05997	0.06813	0.04978	0.0519	0.06801	0.13469
83.06	0.06099	0.06966	0.05094	0.05279	0.06917	0.13578
86.328	0.06126	0.06733	0.04919	0.05303	0.06946	0.13578
89.596	0.06231	0.06772	0.04947	0.05394	0.07066	0.13692
92.864	0.06164	0.06975	0.05098	0.05335	0.0699	0.13635
96.132	0.06164	0.06974	0.05096	0.05336	0.0699	0.13634
99.4	0.06299	0.07098	0.05188	0.05452	0.07142	0.13744
102.668	0.06255	0.07057	0.05159	0.05413	0.07094	0.13733
105.936	0.06235	0.07353	0.05377	0.05396	0.07071	0.13696
109.204	0.06096	0.0702	0.05129	0.05275	0.06914	0.13618
112.472	0.06306	0.069	0.0504	0.05458	0.0715	0.13739
115.74	0.0638	0.07036	0.05143	0.05521	0.07235	0.13816
119.008	0.06435	0.07071	0.05168	0.05569	0.07298	0.13896
122.276	0.06256	0.07188	0.05253	0.05414	0.07095	0.13724
125.544	0.06241	0.07113	0.05199	0.054	0.07078	0.13727
128.812	0.06354	0.07118	0.05202	0.055	0.07206	0.13803
132.08	0.06229	0.07279	0.05322	0.05389	0.07065	0.13689
135.348	0.06337	0.07206	0.05266	0.05482	0.07189	0.13866
138.616	0.06551	0.07252	0.05303	0.05671	0.07429	0.14021
141.884	0.06222	0.07051	0.05153	0.05382	0.07059	0.13746
145.152	0.06252	0.07296	0.05333	0.0541	0.07091	0.13774
148.42	0.06294	0.07384	0.05399	0.05447	0.07138	0.13822
151.688	0.06239	0.07492	0.05476	0.05398	0.07076	0.13755
154.956	0.06493	0.07265	0.05311	0.0562	0.07363	0.13973
158.224	0.06452	0.07246	0.05295	0.05583	0.07317	0.13976
161.492	0.06592	0.07324	0.05354	0.05704	0.07476	0.14097
164.76	0.06461	0.07218	0.05277	0.0559	0.07328	0.14005
168.028	0.06776	0.07282	0.0532	0.05865	0.07683	0.14217
171.296	0.06784	0.07547	0.05518	0.05871	0.07694	0.14256
174.564	0.06588	0.07201	0.05262	0.05701	0.07472	0.14064
177.832	0.06759	0.07214	0.05271	0.05848	0.07666	0.14273
181.1	0.06568	0.07241	0.05288	0.05681	0.07452	0.1414
184.368	0.06599	0.07195	0.05257	0.05708	0.07487	0.14162
187.636	0.06802	0.07469	0.0546	0.05886	0.07714	0.14296
190.904	0.07015	0.07422	0.05423	0.06071	0.07955	0.14492
194.172	0.06822	0.07636	0.05578	0.05904	0.07737	0.1434
197.44	0.06674	0.07502	0.05479	0.05774	0.07572	0.14198
200.708	0.06909	0.078	0.05702	0.05978	0.07836	0.14433
203.976	0.06628	0.07825	0.05717	0.05733	0.0752	0.14212
207.244	0.06834	0.07595	0.0555	0.05911	0.07753	0.14425
210.512	0.0734	0.07771	0.05678	0.06354	0.08323	0.14802
213.78	0.07008	0.07627	0.05569	0.06062	0.0795	0.14568
217.048	0.07028	0.07662	0.05598	0.0608	0.07972	0.14554
220.316	0.07147	0.0784	0.05727	0.06183	0.08108	0.14708
223.584	0.06994	0.08103	0.05923	0.0605	0.07935	0.14567
226.852	0.07149	0.07878	0.05756	0.06185	0.0811	0.14712
230.12	0.07237	0.07694	0.05621	0.06262	0.08209	0.14784
233.388	0.07284	0.07974	0.05825	0.06302	0.08263	0.1485
236.656	0.0734	0.07621	0.05564	0.06349	0.08327	0.14921
239.924	0.07888	0.07903	0.0577	0.06828	0.08945	0.15322
243.192	0.07532	0.08481	0.06198	0.06517	0.08544	0.15075
246.46	0.07352	0.08091	0.05909	0.0636	0.0834	0.14929
249.728	0.07563	0.08101	0.05917	0.06544	0.08579	0.15123
252.996	0.0758	0.08288	0.06053	0.06557	0.08599	0.15168
256.264	0.07757	0.08101	0.05916	0.0671	0.088	0.15309
259.532	0.07706	0.08299	0.06062	0.06665	0.08743	0.15303
262.8	0.07793	0.08349	0.06096	0.0674	0.08842	0.15389
266.068	0.07881	0.08412	0.06144	0.06818	0.0894	0.15444
269.336	0.08072	0.08483	0.06195	0.06984	0.09155	0.15632
272.604	0.07978	0.09125	0.06671	0.069	0.09052	0.1557
275.872	0.08015	0.08722	0.06372	0.06934	0.09091	0.1557
279.14	0.07868	0.08521	0.06224	0.06803	0.08929	0.15511
282.408	0.08192	0.0872	0.06368	0.07087	0.09294	0.15786
285.676	0.08516	0.08776	0.06409	0.0737	0.09658	0.16029
288.944	0.08202	0.08966	0.06548	0.07095	0.09305	0.15789
292.212	0.08388	0.08923	0.06514	0.07258	0.09514	0.15962
295.48	0.08343	0.09015	0.06584	0.07216	0.09464	0.15924
298.748	0.08769	0.09116	0.06656	0.07587	0.09946	0.16306
302.016	0.08492	0.09338	0.06818	0.07344	0.09635	0.16108
305.284	0.08806	0.09176	0.06697	0.07618	0.09989	0.16362
308.552	0.08994	0.09224	0.06735	0.07782	0.10201	0.16518
311.82	0.08922	0.09081	0.06625	0.07721	0.1012	0.16481
315.088	0.09013	0.09416	0.06872	0.07797	0.10225	0.16609
318.356	0.08907	0.09854	0.07199	0.07702	0.10108	0.16543
321.624	0.09162	0.09473	0.06915	0.07925	0.10394	0.16787
324.892	0.09081	0.09651	0.07045	0.07855	0.10303	0.16724
328.16	0.09411	0.09602	0.07011	0.0814	0.10677	0.17008
331.428	0.09338	0.10108	0.07382	0.08078	0.10594	0.16928
334.696	0.09405	0.09761	0.07124	0.08131	0.10671	0.17059
337.964	0.09846	0.10166	0.07422	0.08516	0.1117	0.17475
341.232	0.09949	0.10403	0.07601	0.08605	0.11288	0.17576
344.5	0.10054	0.10292	0.07514	0.08697	0.11407	0.17649
347.768	0.1014	0.10417	0.07604	0.0877	0.11504	0.17776
351.036	0.10307	0.10262	0.0749	0.08913	0.11694	0.17927
354.304	0.10392	0.10584	0.07724	0.08986	0.11791	0.18012
357.572	0.10616	0.10416	0.07602	0.0918	0.12047	0.18287
360.84	0.10546	0.10821	0.07898	0.09121	0.11966	0.18217
364.108	0.11419	0.10794	0.07881	0.09877	0.12953	0.19012
367.376	0.11041	0.10823	0.07894	0.09547	0.12528	0.18695
370.644	0.11331	0.11343	0.08274	0.098	0.12856	0.18965
373.912	0.11505	0.11437	0.08345	0.0995	0.13053	0.19165
377.18	0.11369	0.11577	0.08451	0.09831	0.12901	0.19034
380.448	0.11591	0.11649	0.08502	0.10024	0.13152	0.19241
383.716	0.11886	0.11873	0.0867	0.10278	0.13488	0.19592
386.984	0.12268	0.11926	0.08705	0.1061	0.13917	0.19919
390.252	0.12062	0.12193	0.08892	0.10429	0.13688	0.19753
393.52	0.12526	0.12142	0.08857	0.10833	0.14211	0.20177
396.788	0.12866	0.13124	0.09583	0.11126	0.14599	0.20548
400.056	0.12756	0.12706	0.09268	0.1103	0.14475	0.20452
403.324	0.13233	0.13002	0.09489	0.11443	0.15015	0.2088
406.592	0.1345	0.13255	0.09668	0.1163	0.15262	0.21163
409.86	0.1369	0.13078	0.09534	0.11836	0.15534	0.21373
413.128	0.14194	0.13378	0.09762	0.12275	0.16103	0.21852
416.396	0.14352	0.13717	0.10001	0.1241	0.16285	0.22067
419.664	0.14432	0.14138	0.10312	0.12477	0.16378	0.22146
422.932	0.15279	0.13877	0.10122	0.13212	0.17335	0.22949
426.2	0.15281	0.14437	0.10537	0.13216	0.17337	0.22945
429.468	0.15944	0.14822	0.10811	0.13789	0.18089	0.2363
432.736	0.16457	0.14744	0.10749	0.14232	0.18671	0.24145
436.004	0.17182	0.15238	0.11116	0.1486	0.19492	0.24844
439.272	0.17184	0.15432	0.11248	0.14857	0.19499	0.24882
442.54	0.17599	0.15785	0.11509	0.1522	0.19963	0.2528
445.808	0.18022	0.16342	0.11923	0.15583	0.20448	0.25759
449.076	0.1858	0.16493	0.12024	0.16064	0.21082	0.26313
452.344	0.19174	0.1658	0.12079	0.16574	0.2176	0.26916
455.612	0.19527	0.17572	0.1281	0.16886	0.22155	0.27251
458.88	0.20811	0.17642	0.12872	0.18002	0.23604	0.28496
462.148	0.21442	0.18349	0.13378	0.18549	0.24319	0.29116
465.416	0.22179	0.18929	0.13796	0.19186	0.25157	0.29868
468.684	0.22065	0.19749	0.14409	0.19075	0.25037	0.29811
471.952	0.22684	0.1973	0.14384	0.19614	0.25737	0.30395
475.22	0.24203	0.20224	0.14749	0.2093	0.27459	0.31933
478.488	0.24312	0.20702	0.15087	0.21019	0.27587	0.32045
481.756	0.25977	0.21417	0.15608	0.22472	0.2946	0.33652
485.024	0.26615	0.22069	0.16071	0.23026	0.30184	0.34302
488.292	0.27954	0.22501	0.164	0.24184	0.31697	0.35655
491.56	0.29016	0.23877	0.17403	0.25105	0.32902	0.36724
494.828	0.30149	0.24645	0.17975	0.26091	0.3418	0.37827
498.096	0.3014	0.25533	0.18603	0.26074	0.34179	0.37836
501.364	0.31398	0.25428	0.18526	0.27172	0.35595	0.39089
504.632	0.3293	0.26055	0.18978	0.28494	0.37332	0.40624
507.9	0.34043	0.27817	0.20262	0.29464	0.38591	0.41732
511.168	0.35821	0.27951	0.20358	0.31002	0.40605	0.43481
514.436	0.36313	0.29821	0.21724	0.31432	0.41155	0.43987
517.704	0.3735	0.30613	0.22322	0.32326	0.42335	0.45055
520.972	0.39378	0.32196	0.23456	0.34089	0.44622	0.47002
524.24	0.40153	0.33434	0.24358	0.34766	0.45499	0.47809
527.508	0.41364	0.34576	0.25191	0.35804	0.46878	0.49041
530.776	0.4325	0.34648	0.25239	0.37435	0.49017	0.50927
534.044	0.4497	0.36141	0.26328	0.38936	0.50953	0.52642
537.312	0.45632	0.37913	0.27621	0.39504	0.51707	0.53289
540.58	0.49259	0.39254	0.28587	0.42674	0.55786	0.5687
543.848	0.49724	0.41161	0.30002	0.43075	0.56309	0.57346
547.116	0.51683	0.41783	0.30441	0.4477	0.58528	0.59314
550.384	0.53059	0.42925	0.31264	0.45961	0.60088	0.60697
553.652	0.56192	0.45425	0.331	0.48696	0.6361	0.63801
556.92	0.56773	0.46262	0.337	0.49182	0.64285	0.64419
560.188	0.59009	0.47572	0.34648	0.51122	0.66811	0.66643
563.456	0.60607	0.49819	0.36259	0.52533	0.68593	0.68195
566.724	0.60448	0.51612	0.3758	0.52361	0.68448	0.68105
569.992	0.64887	0.52476	0.38204	0.5623	0.73442	0.72516
573.26	0.67491	0.56867	0.41418	0.58499	0.76382	0.75099
576.528	0.69857	0.57289	0.41725	0.60586	0.7902	0.77414
579.796	0.67807	0.59676	0.43456	0.58778	0.7673	0.75431
583.064	0.71482	0.61251	0.4461	0.62	0.80853	0.79061
586.332	0.74736	0.6463	0.47087	0.64825	0.84523	0.82316
589.6	0.76139	0.6545	0.47653	0.66028	0.8612	0.8373
592.868	0.7567	0.68115	0.49599	0.65629	0.85576	0.83241
596.136	0.79429	0.69863	0.50881	0.68901	0.89816	0.86997
599.404	0.83906	0.69779	0.50762	0.72832	0.94831	0.9145
602.672	0.83978	0.75011	0.54596	0.72895	0.94903	0.9151
605.94	0.88205	0.77979	0.56745	0.76579	0.9967	0.95728
609.208	0.91916	0.80593	0.58699	0.79831	1.03825	0.99436
612.476	0.88123	0.784	0.57021	0.76497	0.9958	0.95636
615.744	0.9181	0.82654	0.60169	0.79689	1.03755	0.99372
619.012	0.97918	0.86391	0.62895	0.85047	1.10587	1.05418
622.28	0.98783	0.87739	0.63829	0.85782	1.11583	1.06302
625.548	1.03256	0.87408	0.63631	0.89686	1.16601	1.10751
628.816	0.99898	0.91644	0.66697	0.86769	1.12826	1.07402
632.084	1.0544	0.96694	0.70392	0.9163	1.19025	1.12903
635.352	1.02471	0.96879	0.70521	0.89036	1.15693	1.0997
638.62	1.05602	1.01883	0.74154	0.91745	1.1922	1.13065
641.888	1.14764	1.05953	0.77116	0.99793	1.29465	1.22206
645.156	1.12873	1.01584	0.73929	0.98107	1.2738	1.20331
648.424	1.12241	1.05992	0.77076	0.97572	1.26661	1.19692
651.692	1.18226	1.12733	0.82015	1.02842	1.33333	1.25652
654.96	1.17723	1.1414	0.83042	1.02399	1.32777	1.25143
658.228	1.19376	1.19515	0.86962	1.03841	1.34629	1.26798
661.496	1.2232	1.15412	0.83976	1.06409	1.37933	1.29732
664.764	1.23864	1.21424	0.88364	1.07792	1.39633	1.31256
668.032	1.25325	1.18198	0.86011	1.09041	1.41297	1.32731
671.3	1.28995	1.21816	0.88615	1.12321	1.45352	1.36341
674.568	1.30482	1.32742	0.96611	1.13607	1.47033	1.37851
677.836	1.32715	1.3017	0.94669	1.15545	1.4954	1.40092
681.104	1.3503	1.29907	0.94602	1.17536	1.52171	1.42423
684.372	1.38268	1.3665	0.9948	1.20438	1.55733	1.45614
687.64	1.41311	1.36019	0.99044	1.23093	1.59154	1.4865
690.908	1.44435	1.38118	1.00494	1.25841	1.62637	1.51756
694.176	1.47828	1.41381	1.02878	1.28868	1.6638	1.55127
697.444	1.4963	1.43333	1.04328	1.30455	1.68385	1.56907
700.712	1.4957	1.446	1.0521	1.30324	1.68392	1.56903
703.98	1.54113	1.48903	1.08487	1.34382	1.73399	1.61413
707.248	1.5564	1.5054	1.09593	1.35719	1.75103	1.62937
710.516	1.58316	1.53289	1.11596	1.38028	1.78131	1.65617
713.784	1.63184	1.55593	1.13188	1.42383	1.83493	1.70434
717.052	1.65463	1.60007	1.16527	1.44366	1.86054	1.72702
720.32	1.66176	1.63523	1.18983	1.44967	1.86859	1.73428
723.588	1.69261	1.67202	1.21674	1.47729	1.90266	1.76477
726.856	1.71006	1.71173	1.24665	1.49215	1.92249	1.78268
730.124	1.73115	1.73074	1.26041	1.51094	1.94581	1.80367
733.392	1.75087	1.72698	1.25629	1.52756	1.96847	1.82334
736.66	1.78805	1.78061	1.29599	1.56135	2.00894	1.86013
739.928	1.78943	1.80303	1.31189	1.56199	2.01088	1.86157
743.196	1.81716	1.83088	1.3318	1.58666	2.04169	1.88938
746.464	1.86043	1.89161	1.37705	1.62478	2.08979	1.93248
749.732	1.89523	1.91131	1.39108	1.65574	2.12811	1.96677
753	1.88919	1.92189	1.39844	1.65036	2.12162	1.96105
756.268	1.92005	1.96298	1.42975	1.67708	2.15611	1.99196
759.536	1.94978	1.98138	1.4412	1.70345	2.18924	2.0214
762.804	1.94705	2.00508	1.45855	1.70177	2.18534	2.01863
766.072	2.00683	2.02149	1.46993	1.75474	2.25174	2.07814
769.34	2.03638	2.07135	1.50719	1.78089	2.28441	2.10775
772.608	2.01892	2.06688	1.50311	1.76459	2.26594	2.09045
775.876	2.06081	2.10151	1.52897	1.80207	2.31191	2.13206
779.144	2.08523	2.14888	1.56306	1.82397	2.33869	2.15629
782.412	2.1207	2.19758	1.59906	1.8557	2.37775	2.19148
785.68	2.14216	2.18735	1.59064	1.87395	2.40223	2.21315
788.948	2.15829	2.22281	1.61558	1.88888	2.41949	2.22919
792.216	2.20157	2.25074	1.63607	1.92764	2.46702	2.27211
795.484	2.21381	2.25985	1.64426	1.93804	2.48097	2.28445
798.752	2.24577	2.32116	1.68829	1.96686	2.51581	2.31617
802.02	2.24115	2.35411	1.71254	1.96216	2.51126	2.3117
805.288	2.27109	2.33698	1.69852	1.98934	2.54373	2.3414
808.556	2.29636	2.38455	1.73372	2.01069	2.57273	2.36671
811.824	2.32407	2.41133	1.75373	2.035	2.60376	2.39435
815.092	2.36147	2.45849	1.78906	2.06893	2.64426	2.43147
818.36	2.34825	2.48144	1.8044	2.05644	2.63041	2.41843
821.628	2.38703	2.49587	1.81544	2.09124	2.67297	2.45704
824.896	2.40504	2.54887	1.85431	2.10739	2.69259	2.47494
828.164	2.43703	2.56433	1.86493	2.1353	2.7283	2.50688
831.432	2.4369	2.60312	1.89487	2.13552	2.72807	2.50683
834.7	2.47714	2.59665	1.8885	2.1713	2.7723	2.54681
837.968	2.49664	2.63673	1.91855	2.1896	2.79292	2.56607
841.236	2.4749	2.64739	1.92414	2.16895	2.77033	2.54472
844.504	2.49358	2.6899	1.95361	2.18502	2.79106	2.56332
847.772	2.5695	2.73769	1.9903	2.25406	2.87364	2.63876
851.04	2.54938	2.72863	1.98212	2.23528	2.85222	2.61889
854.308	2.58662	2.76926	2.01332	2.26895	2.89284	2.65595
857.576	2.61091	2.78977	2.02731	2.29003	2.92004	2.68014
860.844	2.61951	2.8305	2.05753	2.29773	2.92961	2.68879
864.112	2.63956	2.82603	2.05357	2.31537	2.95158	2.70873
867.38	2.69567	2.8682	2.08424	2.36637	3.0127	2.76455
870.648	2.72175	2.893	2.1045	2.39048	3.04054	2.79054
873.916	2.71133	2.86509	2.08132	2.37974	3.03042	2.78025
877.184	2.71693	2.88847	2.09705	2.38463	3.03626	2.78585
880.452	2.77181	2.98048	2.1665	2.43382	3.0967	2.84047
883.72	2.77947	2.95241	2.1433	2.44044	3.10542	2.84808
886.988	2.82721	3.0044	2.18308	2.48417	3.15676	2.89568
890.256	2.79558	3.03708	2.2064	2.4547	3.12313	2.86413
893.524	2.85981	3.03507	2.20427	2.51325	3.19277	2.92816
896.792	2.86283	3.06504	2.22561	2.51583	3.19599	2.9311
900.06	2.86622	3.11932	2.26583	2.51872	3.19992	2.93449
903.328	2.91345	3.15002	2.29011	2.56178	3.25083	2.9816
906.596	2.92175	3.14624	2.28562	2.56855	3.26069	2.98984
909.864	2.9516	3.14883	2.28664	2.59612	3.29272	3.01956
913.132	2.92797	3.21525	2.3337	2.57407	3.26749	2.99601
916.4	2.96695	3.22315	2.34142	2.60912	3.31015	3.03494
919.668	2.99623	3.27968	2.38306	2.63517	3.34222	3.06404
922.936	3.00351	3.24697	2.35813	2.64213	3.35004	3.07139
926.204	3.0346	3.30679	2.40254	2.67005	3.38388	3.10229
929.472	3.03705	3.32149	2.41213	2.67184	3.38672	3.10471
932.74	3.07629	3.31679	2.4083	2.70704	3.42984	3.14375
936.008	3.0929	3.38385	2.45985	2.72238	3.44767	3.16032
939.276	3.09712	3.39729	2.46953	2.72627	3.45229	3.16454
942.544	3.1691	3.42558	2.48986	2.79048	3.53135	3.23632
945.812	3.15095	3.3895	2.46154	2.77479	3.5107	3.21824
949.08	3.15801	3.4379	2.49832	2.78037	3.51937	3.22534
952.348	3.19428	3.47748	2.52604	2.81328	3.55851	3.26157
955.616	3.19362	3.49243	2.53751	2.81291	3.55769	3.26072
958.884	3.26277	3.51802	2.55596	2.87521	3.63274	3.32946
962.152	3.23393	3.52476	2.56063	2.84891	3.60162	3.30095
965.42	3.26345	3.56952	2.5939	2.87506	3.63456	3.33027
968.688	3.23369	3.58452	2.60557	2.84833	3.60197	3.30072
971.956	3.26478	3.59521	2.6132	2.87572	3.63625	3.33173
975.224	3.26816	3.68076	2.67393	2.87939	3.63942	3.33496
978.492	3.35626	3.65034	2.65213	2.95979	3.73438	3.42279
981.76	3.36784	3.66448	2.66145	2.96928	3.74806	3.43435
985.028	3.35168	3.70364	2.6913	2.95405	3.73088	3.41823
988.296	3.38395	3.69763	2.68663	2.98393	3.76559	3.45034
991.564	3.39871	3.79272	2.75755	2.99717	3.78154	3.46505
994.832	3.40139	3.74402	2.72013	2.99903	3.78475	3.46774
998.1	3.4859	3.79552	2.75631	3.07599	3.87635	3.55189
1001.37	3.45527	3.75104	2.72427	3.04769	3.84372	3.52141
1004.64	3.48399	3.79426	2.75573	3.07395	3.87455	3.55004
1007.9	3.4692	3.79405	2.75521	3.06024	3.8585	3.53529
1011.17	3.44753	3.90167	2.83654	3.04008	3.83588	3.51373
1014.44	3.52268	3.90739	2.83805	3.10815	3.91718	3.58851
1017.71	3.52483	3.88094	2.81653	3.11031	3.91951	3.5907
1020.98	3.51977	3.92577	2.85178	3.10593	3.91355	3.58573
1024.24	3.56659	3.94557	2.86598	3.14839	3.96447	3.63232
1027.51	3.54029	3.9424	2.86296	3.12316	3.93713	3.60604
1030.78	3.59686	4.04514	2.93746	3.17619	3.99699	3.66247
1034.05	3.61724	4.00344	2.90613	3.1944	4.01908	3.68277
1037.32	3.64959	4.04015	2.93511	3.22377	4.05427	3.71494
1040.58	3.61554	4.02676	2.92369	3.19197	4.01825	3.6811
1043.85	3.57145	3.98799	2.89442	3.15167	3.97065	3.6371
1047.12	3.68499	4.07126	2.95509	3.25595	4.09244	3.7502
1050.39	3.61639	4.08479	2.96508	3.19207	4.01947	3.68183
1053.66	3.7206	4.07622	2.95922	3.28805	4.1312	3.78568
1056.92	3.75115	4.1414	3.00802	3.31553	4.16431	3.81618
1060.19	3.70924	4.10252	2.97558	3.27656	4.12	3.77438
1063.46	3.72873	4.17203	3.0296	3.29367	4.1416	3.79378
1066.73	3.77291	4.19712	3.04769	3.33308	4.18979	3.83775
1070	3.72196	4.2394	3.079	3.28725	4.1344	3.78705
1073.26	3.83855	4.18732	3.03899	3.3927	4.26102	3.90317
1076.53	3.90613	4.13563	3.00121	3.45633	4.33194	3.97058
1079.8	3.78635	4.26789	3.09819	3.34571	4.20417	3.85113
1083.07	3.83693	4.20274	3.04905	3.39166	4.25894	3.90157
1086.34	3.80025	4.31485	3.13338	3.35733	4.21989	3.86501
1089.6	3.83015	4.34736	3.1556	3.38597	4.251	3.89483
1092.87	3.91564	4.3056	3.12402	3.4636	4.34379	3.98004
1096.14	3.90504	4.32909	3.14064	3.45344	4.33259	3.96948
1099.41	3.88723	4.37332	3.17112	3.43672	4.31359	3.95166
1102.68	3.99396	4.31748	3.1308	3.53492	4.42807	4.05804
1105.94	3.98403	4.45642	3.23158	3.52565	4.41741	4.04802
1109.21	3.97257	4.53666	3.2948	3.51292	4.40744	4.03657
1112.48	4.00379	4.37106	3.16994	3.54346	4.43894	4.06781
1115.75	4.01018	4.44768	3.22673	3.54945	4.44589	4.07419
1119.02	3.97232	4.4176	3.20291	3.51286	4.40695	4.03637
1122.28	3.98766	4.43382	3.21569	3.52831	4.42228	4.05168
1125.55	4.01344	4.5373	3.29263	3.5514	4.45012	4.07738
1128.82	4.01578	4.53603	3.29086	3.55259	4.45326	4.07967
1132.09	4.08864	4.51361	3.27349	3.61967	4.53154	4.15225
1135.36	4.05899	4.62507	3.35535	3.59187	4.50013	4.12274
1138.62	4.07246	4.64729	3.37314	3.60275	4.51556	4.13604
1141.89	4.15035	4.59507	3.32971	3.67581	4.59811	4.21378
1145.16	4.13673	4.63848	3.364	3.66406	4.58281	4.20015
1148.43	4.12812	4.65356	3.37755	3.65636	4.57354	4.19165
1151.7	4.1418	4.61492	3.34501	3.66805	4.58859	4.20515
1154.96	4.15765	4.62919	3.35765	3.68262	4.60581	4.22101
1158.23	4.23514	4.6496	3.37133	3.7525	4.68999	4.29821
1161.5	4.24739	4.67021	3.38481	3.76458	4.70205	4.31046
1164.77	4.26589	4.75161	3.44565	3.78113	4.7225	4.32881
1168.04	4.2534	4.72734	3.42733	3.76997	4.7089	4.31642
1171.3	4.28769	4.72035	3.42024	3.80145	4.7455	4.35057
1174.57	4.20394	4.80528	3.4851	3.72335	4.65691	4.26704
1177.84	4.25194	4.811	3.489	3.76701	4.7088	4.31486
1181.11	4.30226	4.80795	3.48651	3.81431	4.76184	4.36511
1184.38	4.3567	4.81406	3.48861	3.8637	4.82054	4.41929
1187.64	4.33745	4.81924	3.49451	3.8448	4.80094	4.4001
1190.91	4.32424	4.91649	3.56429	3.83375	4.7858	4.38694
1194.18	4.3679	4.92705	3.57327	3.87431	4.83237	4.43052
1197.45	4.30203	4.95437	3.59141	3.81248	4.76291	4.36476
1200.72	4.36717	4.94429	3.58468	3.87327	4.83177	4.42969
1203.98	4.31962	4.96916	3.60337	3.82893	4.78155	4.3823
1207.25	4.39985	4.88499	3.53916	3.90347	4.86685	4.46232
1210.52	4.42987	4.94141	3.57982	3.92955	4.89963	4.49217
1213.79	4.42629	4.98129	3.61165	3.92497	4.8972	4.48853
1217.06	4.41107	5.04752	3.65949	3.9113	4.88062	4.47335
1220.32	4.4975	5.04289	3.65396	3.99184	4.97232	4.55947
1223.59	4.4392	5.02252	3.64053	3.93842	4.90998	4.50142
1226.86	4.54741	5.08291	3.68633	4.03773	5.02569	4.60924
1230.13	4.52351	4.98742	3.6131	4.01587	5.00015	4.58543
1233.4	4.47852	5.06676	3.6732	3.97426	4.95185	4.54053
1236.66	4.54922	5.01441	3.63252	4.03907	5.02806	4.61102
1239.93	4.51877	5.10853	3.70219	4.01028	4.99556	4.58059
1243.2	4.53438	5.14775	3.73123	4.02327	5.01354	4.59609
1246.47	4.66513	5.1416	3.7248	4.1451	5.15238	4.72651
1249.74	4.56675	5.14748	3.72794	4.05397	5.04765	4.62843
1253	4.58905	5.24654	3.79933	4.07466	5.07136	4.65068
1256.27	4.61207	5.16375	3.74204	4.0955	5.09627	4.67346
1259.54	4.61778	5.29144	3.83291	4.10101	5.1022	4.67924
1262.81	4.62813	5.24381	3.79865	4.11087	5.11292	4.68957
1266.08	4.68276	5.18858	3.75883	4.16091	5.17134	4.74407
1269.34	4.64166	5.30513	3.84389	4.12418	5.1269	4.7031
1272.61	4.69284	5.26909	3.81592	4.17037	5.18195	4.75403
1275.88	4.71034	5.28048	3.82375	4.18651	5.20093	4.77151
1279.15	4.74869	5.41242	3.92241	4.22281	5.24099	4.8097
1282.42	4.78952	5.28529	3.82726	4.25937	5.28535	4.85043
1285.68	4.75652	5.31594	3.85145	4.22819	5.25082	4.8175
1288.95	4.74898	5.33712	3.86303	4.22099	5.24287	4.80992
1292.22	4.79132	5.34735	3.87122	4.26054	5.28765	4.85219
1295.49	4.7335	5.37814	3.89571	4.20637	5.22629	4.79448
1298.76	4.85041	5.44051	3.94267	4.3143	5.35127	4.91106
1302.02	4.84346	5.36574	3.88718	4.30756	5.34429	4.90407
1305.29	4.80063	5.46921	3.96174	4.26884	5.29761	4.8614
1308.56	4.79575	5.4769	3.96655	4.26363	5.2935	4.8565
1311.83	4.88602	5.50848	3.99333	4.34582	5.39008	4.94644
1315.1	4.79748	5.56997	4.03703	4.26478	5.29563	4.8582
1318.36	4.91842	5.5249	4.002	4.37754	5.42332	4.97877
1321.63	4.89344	5.51033	3.98919	4.35312	5.398	4.95383
1324.9	4.88235	5.58759	4.04911	4.34374	5.38556	4.94275
1328.17	4.98984	5.4832	3.97011	4.44239	5.50046	5.04985
1331.44	5.01241	5.65003	4.09201	4.46334	5.52455	5.07227
1334.7	4.96157	5.62253	4.07088	4.41623	5.47046	5.02167
1337.97	4.82528	5.59287	4.05173	4.28759	5.32753	4.88574
1341.24	4.93788	5.55704	4.02216	4.39433	5.44521	4.99801
1344.51	4.89474	5.6948	4.12268	4.35358	5.40018	4.95501
1347.78	5.06369	5.56608	4.02802	4.5092	5.58038	5.12338
1351.04	4.94609	5.69193	4.12305	4.40047	5.45522	5.00611
1354.31	5.0685	5.66901	4.10376	4.51519	5.58376	5.12823
1357.58	4.95906	5.69547	4.12192	4.41222	5.46949	5.0191
1360.85	4.95438	5.80644	4.20386	4.40772	5.46359	5.01445
1364.12	5.11618	5.8192	4.20909	4.55828	5.63532	5.17565
1367.38	5.0847	5.75567	4.16525	4.52792	5.60287	5.14428
1370.65	4.99325	5.63146	4.07337	4.44323	5.50624	5.05313
1373.92	5.19294	5.73678	4.15174	4.62769	5.71859	5.25209
1377.19	5.13927	5.68891	4.11686	4.57903	5.66062	5.19862
1380.46	5.04662	5.85199	4.23394	4.49239	5.56304	5.10629
1383.72	5.08714	5.75927	4.16488	4.53077	5.60558	5.14667
1386.99	5.18577	5.90414	4.27458	4.62187	5.71034	5.24494
1390.26	5.22631	5.73908	4.15287	4.65741	5.75504	5.28528
1393.53	5.19607	5.74304	4.1552	4.63176	5.72111	5.25525
1396.8	5.15979	5.95333	4.30702	4.59706	5.68333	5.21905
1400.06	5.32054	5.9309	4.29271	4.74584	5.85377	5.37924
1403.33	5.18359	5.81277	4.20366	4.61837	5.70913	5.24272
1406.6	5.1263	6.04089	4.37019	4.56549	5.64845	5.18561
1409.87	5.1968	6.00825	4.34845	4.63076	5.72297	5.25587
1413.14	5.29055	5.86824	4.24472	4.7166	5.82363	5.34922
1416.4	5.30983	5.90552	4.26988	4.73651	5.84218	5.36859
1419.67	5.25922	6.02815	4.3595	4.68907	5.78898	5.31802
1422.94	5.27836	6.09393	4.40668	4.7059	5.81015	5.33709
1426.21	5.31795	6.05328	4.37967	4.74421	5.85074	5.37662
1429.48	5.30429	5.99089	4.33314	4.73012	5.83701	5.36296
1432.74	5.31049	6.19822	4.48471	4.73511	5.8448	5.3691
1436.01	5.38907	5.99804	4.33763	4.80862	5.92743	5.44745
1439.28	5.38067	5.93502	4.28924	4.8002	5.91903	5.43899
1442.55	5.27326	6.02941	4.3591	4.69913	5.8065	5.33186
1445.82	5.40912	6.1489	4.44558	4.82469	5.95095	5.46725
1449.08	5.43563	6.20463	4.48988	4.85072	5.97789	5.49371
1452.35	5.47953	6.08346	4.39742	4.89318	6.02244	5.53754
1455.62	5.39971	6.12657	4.43047	4.81716	5.94007	5.45789
1458.89	5.32634	6.21647	4.49628	4.74795	5.86318	5.38471
1462.16	5.5109	6.18337	4.47128	4.92124	6.05687	5.56878
1465.42	5.51367	6.15683	4.44974	4.92376	6.05944	5.57149
1468.69	5.47292	6.25965	4.52715	4.88421	6.01796	5.53082
1471.96	5.43	6.24232	4.51175	4.84418	5.97267	5.48809
1475.23	5.40109	6.1483	4.44061	4.81577	5.94347	5.45919
1478.5	5.54749	6.32033	4.56676	4.9547	6.09557	5.60517
1481.76	5.4848	6.32049	4.56676	4.89436	6.03097	5.54261
1485.03	5.5619	6.39062	4.62188	4.96747	6.11183	5.61951
1488.3	5.585	6.25435	4.51834	4.9899	6.13561	5.64262
1491.57	5.58507	6.19805	4.47608	4.98923	6.136	5.64256
1494.84	5.48582	6.42489	4.64558	4.89516	6.03284	5.54362
1498.1	5.54358	6.39134	4.61843	4.94955	6.09307	5.6012
1501.37	5.52875	6.38064	4.6105	4.93841	6.07523	5.58644
1504.64	5.61745	6.33725	4.57957	5.02011	6.16974	5.67484
1507.91	5.65272	6.27036	4.52631	5.05007	6.20911	5.7099
1511.18	5.516	6.47125	4.67577	4.92171	6.066	5.57353
1514.44	5.56273	6.38917	4.61345	4.96638	6.11455	5.6202
1517.71	5.49157	6.50491	4.70278	4.9	6.03937	5.54925
1520.98	5.70411	6.49551	4.69674	5.09886	6.263	5.76111
1524.25	5.67098	6.45814	4.66588	5.06876	6.22709	5.72809
1527.52	5.59178	6.37457	4.60418	4.99252	6.14553	5.64909
1530.78	5.67979	6.46078	4.6671	5.07527	6.2378	5.73677
1534.05	5.73531	6.4175	4.63598	5.12684	6.29662	5.79214
1537.32	5.72423	6.53301	4.72062	5.11693	6.28461	5.78109
1540.59	5.73735	6.57827	4.75122	5.12831	6.29913	5.79412
1543.86	5.68426	6.41594	4.62924	5.07837	6.24343	5.7412
1547.12	5.77025	6.48242	4.68061	5.15803	6.33506	5.82687
1550.39	5.7572	6.35476	4.58658	5.14777	6.31924	5.81388
1553.66	5.77993	6.60695	4.77291	5.16813	6.34423	5.83647
1556.93	5.86208	6.57447	4.74575	5.24409	6.43099	5.91841
1560.2	5.94192	6.52354	4.70921	5.3192	6.51514	5.99799
1563.46	5.76662	6.59618	4.76104	5.15541	6.33045	5.82326
1566.73	5.72755	6.67888	4.82231	5.11668	6.29084	5.78421
1570	5.83686	6.62246	4.78009	5.21836	6.40642	5.89319
1573.27	5.72571	6.68658	4.82781	5.11548	6.28878	5.78239
1576.54	5.75733	6.61029	4.76859	5.14603	6.3212	5.8139
1579.8	5.79218	6.67772	4.82026	5.17986	6.35674	5.84875
1583.07	5.82878	6.67496	4.81751	5.21401	6.39498	5.88522
1586.34	5.89275	6.73942	4.86233	5.27142	6.4649	5.94882
1589.61	5.815	6.8306	4.93131	5.19912	6.38259	5.87137
1592.88	5.89533	6.94448	5.01617	5.27366	6.4676	5.95136
1596.14	5.93248	6.68916	4.82609	5.30991	6.50551	5.9885
1599.41	5.79244	6.66807	4.8074	5.17722	6.35937	5.84884
1602.68	5.83089	6.8207	4.9219	5.21456	6.39875	5.88724
1605.95	5.88707	6.64783	4.79413	5.2648	6.4596	5.94312
1609.22	5.8244	6.6901	4.82361	5.20585	6.39422	5.88062
1612.48	5.87486	6.76576	4.88349	5.25332	6.44709	5.93088
1615.75	5.94216	6.7619	4.88051	5.31724	6.51689	5.99799
1619.02	5.98691	6.86916	4.95503	5.35889	6.56401	6.04256
1622.29	5.98162	6.74907	4.86759	5.35215	6.56025	6.03731
1625.56	6.02488	6.88927	4.96693	5.39234	6.60578	6.08039
1628.82	5.91384	6.91964	4.99419	5.28913	6.48848	5.96977
1632.09	6.08219	6.74011	4.85954	5.44943	6.66321	6.13754
1635.36	5.99606	6.80169	4.90726	5.3662	6.57467	6.05167
1638.63	6.0015	6.81916	4.91579	5.36996	6.58147	6.05702
1641.9	5.88156	6.77476	4.88394	5.25784	6.45564	5.93746
1645.16	5.98844	6.83831	4.92803	5.35798	6.56788	6.04398
1648.43	6.11094	6.91636	4.98646	5.47181	6.69742	6.16607
1651.7	6.04514	6.96329	5.01831	5.41194	6.6269	6.10053
1654.97	6.03601	6.94548	5.00685	5.40244	6.61776	6.09141
1658.24	6.11861	7.02146	5.06249	5.48113	6.70338	6.17369
1661.5	6.2713	6.90661	4.97756	5.6229	6.86497	6.3259
1664.77	6.18118	7.07224	5.09949	5.53876	6.76996	6.23607
1668.04	6.13004	6.97083	5.02359	5.4895	6.71737	6.18502
1671.31	6.11341	6.97445	5.02436	5.47548	6.6988	6.16847
1674.58	6.23099	6.85879	4.93914	5.58573	6.82194	6.28566
1677.84	6.08792	7.00995	5.05133	5.45018	6.67281	6.14299
1681.11	6.1328	7.08694	5.10474	5.49332	6.71928	6.18784
1684.38	6.29382	7.03927	5.07318	5.64531	6.88737	6.34827
1687.65	6.08463	7.03594	5.0686	5.44608	6.67059	6.13982
1690.92	6.13192	7.11366	5.12369	5.49144	6.71911	6.18685
1694.18	6.21477	7.34602	5.29468	5.56985	6.80537	6.26946
1697.45	6.24228	7.21436	5.19956	5.59334	6.83596	6.29681
1700.72	6.28543	7.12021	5.12848	5.63508	6.88042	6.33982
1703.99	6.26016	7.13157	5.13429	5.60961	6.85542	6.31464
1707.26	6.20505	7.22231	5.20109	5.55734	6.79851	6.25968
1710.52	6.15693	7.15735	5.15125	5.51298	6.74741	6.21168
1713.79	6.17972	7.17672	5.17347	5.53612	6.7698	6.23451
1717.06	6.35638	7.31809	5.27225	5.70177	6.95496	6.41049
1720.33	6.17324	7.08827	5.10741	5.52833	6.76399	6.22797
1723.6	6.23221	7.12657	5.1303	5.58514	6.82466	6.28672
1726.86	6.29187	7.22355	5.20363	5.64178	6.88675	6.3462
1730.13	6.31437	7.2594	5.22532	5.66112	6.91176	6.3685
1733.4	6.37593	7.30349	5.25815	5.71956	6.97547	6.42987
1736.67	6.30451	7.30057	5.25791	5.65196	6.90137	6.35876
1739.94	6.19302	7.23064	5.20273	5.54555	6.78626	6.2476
1743.2	6.38054	7.20118	5.18066	5.72166	6.98239	6.4344
1746.47	6.34296	7.21548	5.1974	5.68872	6.94111	6.39704
1749.74	6.26726	7.4082	5.33523	5.61665	6.86298	6.32164
1753.01	6.36021	7.1895	5.17421	5.70241	6.96139	6.41418
1756.28	6.24352	7.25221	5.22038	5.59174	6.84015	6.29783
1759.54	6.32467	7.36447	5.30249	5.66901	6.92401	6.37871
1762.81	6.32127	7.34766	5.28698	5.66481	6.92155	6.37535
1766.08	6.33005	7.42449	5.34166	5.67245	6.93097	6.38401
1769.35	6.39046	7.34999	5.28858	5.73171	6.99229	6.44437
1772.62	6.40841	7.19492	5.17262	5.7456	7.0138	6.4621
1775.88	6.32398	7.4266	5.33856	5.66547	6.92605	6.37789
1779.15	6.31299	7.38073	5.31017	5.65745	6.91248	6.36701
1782.42	6.47394	7.30294	5.25541	5.80786	7.08197	6.52741
1785.69	6.36069	7.38393	5.31105	5.7003	6.96401	6.41449
1788.96	6.49272	7.24725	5.20837	5.82698	7.0996	6.54606
1792.22	6.29256	7.38206	5.30842	5.63759	6.89154	6.34659
1795.49	6.4341	7.3653	5.29497	5.76801	7.04155	6.48761
1798.76	6.53681	7.37539	5.30119	5.86907	7.14524	6.59007
1802.03	6.41125	7.44792	5.35886	5.74686	7.01771	6.46489
1805.3	6.53004	7.48976	5.38292	5.86126	7.13956	6.58326
1808.56	6.52863	7.40876	5.32311	5.8591	7.1391	6.58183
1811.83	6.5651	7.36888	5.29578	5.89445	7.17643	6.61822
1815.1	6.48422	7.58019	5.44967	5.81662	7.09272	6.53752
1818.37	6.58473	7.36729	5.29159	5.91036	7.19869	6.63764
1821.64	6.42286	7.57218	5.44329	5.75783	7.02972	6.4763
1824.9	6.60773	7.37784	5.29899	5.93268	7.22222	6.66061
1828.17	6.39316	7.46718	5.36191	5.72844	6.99995	6.44676
1831.44	6.48706	7.65843	5.50811	5.81762	7.09727	6.54028
1834.71	6.53502	7.45981	5.35924	5.86367	7.14685	6.5881
1837.98	6.53036	7.61504	5.47336	5.85893	7.14246	6.58352
1841.24	6.55217	7.6287	5.48141	5.87782	7.16627	6.60516
1844.51	6.43983	7.68275	5.52281	5.77294	7.04741	6.4932
1847.78	6.68434	7.50646	5.38875	6.00331	7.3037	6.73683
1851.05	6.52649	7.651	5.49391	5.85374	7.13973	6.57955
1854.32	6.51979	7.48792	5.37367	5.84838	7.13152	6.5729
1857.58	6.71689	7.75162	5.57036	6.03506	7.33683	6.76928
1860.85	6.53725	7.43752	5.33738	5.86282	7.15179	6.59016
1864.12	6.60263	7.57319	5.43646	5.92607	7.21863	6.65548
1867.39	6.58777	7.59595	5.45488	5.90951	7.20432	6.64048
1870.66	6.52681	7.64281	5.49032	5.85216	7.14104	6.57984
1873.92	6.63579	7.67355	5.50948	5.95688	7.25337	6.68842
1877.19	6.63461	7.50254	5.38411	5.95374	7.25355	6.68719
1880.46	6.6844	7.78363	5.58689	5.99995	7.30618	6.7368
1883.73	6.58956	7.63114	5.47645	5.91078	7.20698	6.64232
1887	6.70691	7.578	5.4386	6.02138	7.32975	6.75923
1890.26	6.52656	7.81926	5.61302	5.85116	7.1417	6.57953
1893.53	6.5641	7.62596	5.46886	5.89031	7.17788	6.61681
1896.8	6.5636	7.70167	5.53137	5.88625	7.17999	6.61623
1900.07	6.57736	7.71472	5.53388	5.90417	7.18976	6.6302
1903.34	6.49477	7.58014	5.43908	5.82514	7.10451	6.54788
1906.6	6.68577	7.72647	5.54375	6.0019	7.30695	6.73809
1909.87	6.6764	7.76655	5.57017	5.99136	7.29908	6.72872
1913.14	6.6944	7.81761	5.60809	6.00943	7.31655	6.74666
1916.41	6.66518	7.67373	5.50408	5.97752	7.28982	6.71741
1919.68	6.70576	7.86892	5.6444	6.0177	7.33044	6.75788
1922.94	6.83699	7.62406	5.46971	6.14335	7.46596	6.88875
1926.21	6.59236	7.67669	5.5102	5.90837	7.21428	6.64485
1929.48	6.74736	7.6452	5.48362	6.05518	7.37536	6.79922
1932.75	6.72601	7.63298	5.47779	6.03796	7.35049	6.77805
1936.02	6.64458	7.61076	5.46209	5.95885	7.26821	6.69691
1939.28	6.80813	7.79673	5.58778	6.11235	7.43875	6.85981
1942.55	6.84341	7.78648	5.58093	6.1472	7.47448	6.89502
1945.82	6.75455	7.80156	5.5933	6.06223	7.38264	6.80645
1949.09	6.77728	7.76808	5.56151	6.08227	7.40742	6.82898
1952.36	6.788	7.84051	5.61673	6.09276	7.41869	6.8397
1955.62	6.78671	8.03963	5.76442	6.09246	7.41676	6.83849
1958.89	6.87055	7.6823	5.49963	6.17202	7.50325	6.92194
1962.16	6.78929	7.88883	5.64601	6.09653	7.41797	6.84105
1965.43	6.82517	7.81789	5.5987	6.12845	7.4572	6.8768
1968.7	6.96217	7.78468	5.57426	6.25597	7.60121	7.01319
1971.96	6.89662	7.89652	5.65284	6.19602	7.53065	6.94793
1975.23	6.8668	7.99366	5.72518	6.16625	7.50086	6.91808
1978.5	6.77692	7.89363	5.65392	6.07695	7.41138	6.82847
1981.77	7.12144	7.95627	5.69126	6.40802	7.76476	7.17185
1985.04	6.7626	7.91692	5.66366	6.06273	7.39736	6.81413
1988.3	6.84519	7.93265	5.67816	6.145	7.47945	6.89646
1991.57	6.76907	8.03956	5.75183	6.0698	7.40334	6.82054
1994.84	6.88043	7.92576	5.67372	6.17738	7.51713	6.93162
1998.11	6.79815	7.95392	5.69367	6.10166	7.42898	6.84949
2001.38	6.79893	8.08689	5.78534	6.09484	7.43647	6.8501
2004.64	6.90507	8.03135	5.74732	6.19437	7.54751	6.95588
2007.91	6.84665	8.00105	5.71923	6.13902	7.4867	6.8977
2011.18	6.86802	7.94159	5.67362	6.15989	7.50903	6.919
2014.45	6.95584	8.36104	5.97759	6.24533	7.5982	7.00648
2017.72	6.83352	7.91359	5.64853	6.12631	7.47324	6.88457
2020.98	6.81175	8.00434	5.7201	6.10875	7.44821	6.86295
2024.25	6.92791	7.87722	5.62387	6.21819	7.56951	6.97871
2027.52	6.82272	8.06998	5.76784	6.11862	7.4604	6.87392
2030.79	6.75066	8.01548	5.72461	6.05035	7.38528	6.80204
2034.06	6.83113	8.01338	5.71478	6.12357	7.47134	6.88217
2037.32	6.98608	8.0592	5.74562	6.2726	7.63096	7.0367
2040.59	6.88427	7.98478	5.69373	6.17348	7.52681	6.9351
2043.86	6.9438	8.04669	5.73834	6.23415	7.58555	6.99449
2047.13	6.85221	8.11814	5.78804	6.14333	7.49332	6.90312
2050.4	7.08212	8.00746	5.70676	6.36233	7.73166	7.13234
2053.66	6.74858	7.96287	5.68006	6.045	7.3863	6.79985
2056.93	6.84015	8.07982	5.76269	6.12942	7.4831	6.89102
2060.2	7.01783	7.97723	5.69147	6.29849	7.66689	7.0681
2063.47	6.85414	7.90368	5.63537	6.14393	7.49612	6.90501
2066.74	6.76935	8.01122	5.71141	6.06167	7.41029	6.82039
2070	7.00828	8.19144	5.84327	6.28986	7.65666	7.05856
2073.27	6.77508	8.05327	5.73768	6.07088	7.41297	6.82637
		8.19112	5.84277
		8.00619	5.70398
		8.30342	5.92353
		7.87749	5.6122
		8.003	5.69585
		8.24864	5.87461
		7.98996	5.69156
		7.93803	5.64722
		8.24763	5.87345
		7.95195	5.66935
