# Supplementary material for: Hypoxia triggers collective aerotactic migration in Dictyostelium discoideum
Source: eLife. 2021 Aug 20;10:e64731. doi: 10.7554/eLife.64731 (PMC8378850; doi:10.7554/eLife.64731)
Supplement: Figure 2—figure supplement 5—source data 1. [file elife-64731-fig2-figsupp5-data1.xlsx]

## Sheet: Figure 2 figure supplement 5
Figure 2 figure supplement 5
Position relative to median axis for experiments (µm)	Experimental O2 (%) Gap0.5mm	Experimental O2 (%) Gap1mm	Experimental O2 (%) Gap2mm	Position relative to median axis for simulations (µm)	Simulated O2 (%) Gap 0.5mm	Simulated O2 (%) Gap 1mm	Simulated O2 (%) Gap2mm
-1997.1	0.82624	1.59315	1.44328	2000	20.9945	20.9908	20.9642
-1993.95	0.8245	1.58556	1.44078	1980	20.994	20.9899	20.9615
-1990.8	0.82331	1.57761	1.43702	1960	20.9936	20.989	20.9587
-1987.65	0.81571	1.56997	1.43278	1940	20.9927	20.9881	20.9546
-1984.5	0.80842	1.56398	1.43012	1920	20.9922	20.9867	20.9505
-1981.35	0.79959	1.56293	1.42893	1900	20.9913	20.9858	20.9459
-1978.2	0.79027	1.5593	1.42559	1880	20.9908	20.9844	20.9417
-1975.05	0.78026	1.5535	1.42199	1860	20.9899	20.9835	20.9376
-1971.9	0.76945	1.54895	1.41889	1840	20.9894	20.9817	20.9317
-1968.75	0.76434	1.54407	1.41442	1820	20.9885	20.9803	20.9257
-1965.6	0.7656	1.53584	1.41238	1800	20.9876	20.9789	20.9202
-1962.45	0.78111	1.52798	1.41142	1780	20.9867	20.9775	20.9138
-1959.3	0.80588	1.52214	1.40735	1760	20.9849	20.9752	20.905
-1956.15	0.83701	1.51547	1.40591	1740	20.9835	20.9729	20.8963
-1953	0.87871	1.50735	1.40129	1720	20.9821	20.9711	20.8881
-1949.85	0.926	1.49806	1.39564	1700	20.9807	20.9688	20.8794
-1946.7	0.96749	1.49009	1.39297	1680	20.9789	20.9661	20.8688
-1943.55	0.99368	1.48326	1.38855	1660	20.9775	20.9633	20.8578
-1940.4	1.01397	1.47749	1.38521	1640	20.9757	20.9606	20.8463
-1937.25	1.02751	1.47124	1.38053	1620	20.9739	20.9578	20.8353
-1934.1	1.02425	1.4661	1.37547	1600	20.9716	20.9541	20.8206
-1930.95	0.99817	1.45777	1.37319	1580	20.9693	20.9495	20.8032
-1927.8	0.95437	1.44914	1.36932	1560	20.9665	20.9454	20.7862
-1924.65	0.90713	1.44281	1.36426	1540	20.9642	20.9408	20.7688
-1921.5	0.84902	1.43831	1.36104	1520	20.9615	20.9367	20.7518
-1918.35	0.79266	1.43388	1.3563	1500	20.9578	20.9307	20.7307
-1915.2	0.75085	1.42748	1.35103	1480	20.9541	20.9252	20.7092
-1912.05	0.72188	1.41942	1.34821	1460	20.9509	20.9197	20.6876
-1908.9	0.70411	1.41165	1.34277	1440	20.9472	20.9142	20.6656
-1905.75	0.69931	1.4035	1.33897	1420	20.9422	20.9055	20.6335
-1902.6	0.69763	1.39678	1.33438	1400	20.9367	20.8968	20.6014
-1899.45	0.70207	1.39004	1.33185	1380	20.9317	20.8881	20.5693
-1896.3	0.70918	1.38195	1.33201	1360	20.9266	20.8794	20.5372
-1893.15	0.72125	1.3774	1.33027	1340	20.9206	20.8693	20.4986
-1890	0.72981	1.37296	1.32847	1320	20.9142	20.8583	20.455
-1886.85	0.73738	1.37054	1.32856	1300	20.9073	20.8472	20.4115
-1883.7	0.74432	1.36653	1.32844	1280	20.9009	20.8367	20.3679
-1880.55	0.74726	1.36387	1.32593	1260	20.8917	20.8225	20.3133
-1877.4	0.74664	1.36247	1.32496	1240	20.8817	20.8064	20.2518
-1874.25	0.74663	1.35896	1.32205	1220	20.8716	20.7908	20.1899
-1871.1	0.74127	1.35259	1.32074	1200	20.8615	20.7752	20.1284
-1867.95	0.73418	1.34899	1.31739	1180	20.8509	20.7583	20.0665
-1864.8	0.72808	1.34478	1.31676	1160	20.8372	20.7362	19.9936
-1861.65	0.72057	1.34008	1.31774	1140	20.8234	20.7142	19.9202
-1858.5	0.71404	1.33578	1.32086	1120	20.8096	20.6922	19.8472
-1855.35	0.71199	1.3294	1.32476	1100	20.795	20.6683	19.7697
-1852.2	0.7085	1.32211	1.32905	1080	20.7757	20.6362	19.667
-1849.05	0.70823	1.31633	1.335	1060	20.756	20.6041	19.5647
-1845.9	0.71227	1.30994	1.34247	1040	20.7367	20.572	19.4624
-1842.75	0.7116	1.30429	1.34992	1020	20.7174	20.5404	19.3596
-1839.6	0.71429	1.29944	1.35215	1000	20.6945	20.5014	19.2463
-1836.45	0.71643	1.29337	1.35024	980	20.6693	20.4578	19.1271
-1833.3	0.72039	1.28784	1.34763	960	20.6436	20.4142	19.0078
-1830.15	0.72156	1.28455	1.3427	940	20.6183	20.3706	18.8885
-1827	0.72292	1.27935	1.33545	920	20.5807	20.3156	18.7537
-1823.85	0.72337	1.27524	1.32773	900	20.5376	20.2555	18.6119
-1820.7	0.72301	1.27043	1.31675	880	20.495	20.1954	18.4706
-1817.55	0.72392	1.26524	1.30625	860	20.4523	20.1353	18.3294
-1814.4	0.72245	1.26201	1.29474	840	20.4078	20.0725	18.1876
-1811.25	0.72118	1.25805	1.28599	820	20.3555	19.9936	18.0326
-1808.1	0.72065	1.25336	1.27983	800	20.3032	19.9147	17.878
-1804.95	0.71841	1.25107	1.27429	780	20.2509	19.8362	17.7229
-1801.8	0.71859	1.24863	1.27013	760	20.1936	19.75	17.5665
-1798.65	0.71966	1.24626	1.26697	740	20.1147	19.6335	17.4005
-1795.5	0.71863	1.24205	1.26415	720	20.0358	19.5174	17.2339
-1792.35	0.71812	1.23625	1.26069	700	19.9569	19.4009	17.0679
-1789.2	0.71915	1.23357	1.2571	680	19.878	19.2849	16.9018
-1786.05	0.72078	1.22985	1.2549	660	19.789	19.1537	16.7321
-1782.9	0.72413	1.22479	1.25128	640	19.6899	19.0096	16.5587
-1779.75	0.72593	1.21895	1.24794	620	19.5908	18.8656	16.3849
-1776.6	0.72874	1.21206	1.24747	600	19.4917	18.7216	16.2115
-1773.45	0.73287	1.20878	1.24833	580	19.3601	18.5472	16.0335
-1770.3	0.73532	1.20809	1.24844	560	19.2128	18.3578	15.8523
-1767.15	0.73598	1.20755	1.24751	540	19.0651	18.1679	15.6711
-1764	0.73556	1.2068	1.24595	520	18.9174	17.9784	15.4904
-1760.85	0.73616	1.20604	1.24457	500	18.7688	17.7881	15.3092
-1757.7	0.73802	1.20296	1.24331	480	18.5812	17.5679	15.1261
-1754.55	0.73579	1.1988	1.24373	460	18.3936	17.3482	14.9427
-1751.4	0.73502	1.19479	1.24112	440	18.206	17.128	14.7592
-1748.25	0.73542	1.19006	1.23641	420	18.0092	16.9014	14.5757
-1745.1	0.73569	1.1825	1.23483	400	17.7592	16.639	14.389
-1741.95	0.73568	1.17555	1.23255	380	17.5087	16.3761	14.2023
-1738.8	0.73806	1.16701	1.23106	360	17.2587	16.1133	14.0161
-1735.65	0.73726	1.15958	1.23107	340	17.0087	15.8505	13.8294
-1732.5	0.74068	1.15387	1.22968	320	16.7381	15.5789	13.6422
-1729.35	0.74123	1.14743	1.22777	300	16.4399	15.295	13.455
-1726.2	0.73987	1.14259	1.22905	280	16.1417	15.0115	13.2679
-1723.05	0.73915	1.13931	1.22991	260	15.8436	14.728	13.0803
-1719.9	0.73835	1.13562	1.23011	240	15.5009	14.4294	12.8927
-1716.75	0.73899	1.133	1.22934	220	15.1266	14.1206	12.7041
-1713.6	0.74218	1.12994	1.22751	200	14.7523	13.8119	12.5161
-1710.45	0.74347	1.12612	1.22338	180	14.378	13.5032	12.3275
-1707.3	0.74278	1.1232	1.22199	160	14	13.1936	12.139
-1704.15	0.74507	1.12025	1.22179	140	13.5904	12.8752	11.9505
-1701	0.7442	1.11795	1.2201	120	13.1807	12.5569	11.7624
-1697.85	0.74591	1.1135	1.22175	100	12.7711	12.2385	11.5739
-1694.7	0.74859	1.10984	1.22366	80	12.3601	11.9197	11.3853
-1691.55	0.75269	1.10487	1.22399	60	11.9193	11.5936	11.1963
-1688.4	0.75582	1.10103	1.22521	40	11.4784	11.267	11.0073
-1685.25	0.75834	1.0979	1.22532	20	11.0376	10.9408	10.8183
-1682.1	0.76075	1.09585	1.22692	5.0822e-15	10.5968	10.6142	10.6298
-1678.95	0.76477	1.0912	1.22873	-20	10.156	10.2885	10.4408
-1675.8	0.76796	1.08775	1.22811	-40	9.7156	9.96376	10.2518
-1672.65	0.76979	1.08393	1.23096	-60	9.27523	9.63899	10.0633
-1669.5	0.77061	1.0817	1.23306	-80	8.83486	9.31376	9.87431
-1666.35	0.77256	1.07577	1.23478	-100	8.41835	8.99404	9.68532
-1663.2	0.77222	1.07177	1.23896	-120	8.01927	8.67752	9.49679
-1660.05	0.77289	1.06741	1.24336	-140	7.62018	8.36101	9.3078
-1656.9	0.7769	1.06276	1.24647	-160	7.2211	8.0445	9.11927
-1653.75	0.77724	1.0588	1.24945	-180	6.82156	7.72798	8.93073
-1650.6	0.77722	1.05469	1.2534	-200	6.44495	7.41972	8.7422
-1647.45	0.77645	1.0508	1.25546	-220	6.07064	7.11239	8.55367
-1644.3	0.7774	1.0491	1.25456	-240	5.69633	6.80505	8.36514
-1641.15	0.77923	1.04865	1.25211	-260	5.32706	6.49908	8.17661
-1638	0.78369	1.04743	1.24732	-280	5.03349	6.2156	7.98899
-1634.85	0.78441	1.04598	1.24266	-300	4.73945	5.93165	7.80138
-1631.7	0.78454	1.04469	1.2349	-320	4.44606	5.64817	7.61376
-1628.55	0.78462	1.04445	1.22524	-340	4.15243	5.36468	7.42615
-1625.4	0.78147	1.04313	1.21845	-360	3.89142	5.09633	7.23899
-1622.25	0.78239	1.03983	1.21211	-380	3.6556	4.83991	7.05229
-1619.1	0.78316	1.03845	1.20603	-400	3.41982	4.58344	6.86606
-1615.95	0.78454	1.03409	1.20299	-420	3.18399	4.32697	6.67936
-1612.8	0.78429	1.02978	1.20207	-440	2.98697	4.09803	6.49404
-1609.65	0.78665	1.02511	1.20095	-460	2.8133	3.88564	6.31009
-1606.5	0.78898	1.02	1.20158	-480	2.63963	3.67326	6.12569
-1603.35	0.79457	1.01764	1.20502	-500	2.46596	3.46092	5.94174
-1600.2	0.79781	1.01433	1.20858	-520	2.29826	3.25385	5.7578
-1597.05	0.80142	1.01004	1.21063	-540	2.15784	3.07128	5.57615
-1593.9	0.80628	1.00613	1.2134	-560	2.01748	2.88872	5.3945
-1590.75	0.80899	1.0048	1.21373	-580	1.87706	2.70619	5.2133
-1587.6	0.81241	1.0036	1.21205	-600	1.74106	2.52826	5.03257
-1584.45	0.81544	1.00087	1.20864	-620	1.64197	2.38968	4.85826
-1581.3	0.81938	1.00037	1.2053	-640	1.54294	2.2511	4.6844
-1578.15	0.82634	0.99943	1.20315	-660	1.44385	2.11252	4.51009
-1575	0.83019	1.00116	1.20218	-680	1.34482	1.97394	4.33601
-1571.85	0.8323	1.00117	1.20114	-700	1.25651	1.84509	4.16587
-1568.7	0.83544	1.00248	1.20033	-720	1.18037	1.72729	3.99913
-1565.55	0.83951	1.00187	1.19767	-740	1.10417	1.6095	3.83239
-1562.4	0.8424	0.99973	1.19762	-760	1.02803	1.4917	3.66564
-1559.25	0.84329	0.99848	1.19892	-780	0.967385	1.39798	3.50697
-1556.1	0.84692	0.99797	1.1984	-800	0.917202	1.3205	3.35317
-1552.95	0.84925	0.99731	1.20098	-820	0.867064	1.24307	3.19936
-1549.8	0.84884	0.99651	1.20178	-840	0.816881	1.1656	3.0455
-1546.65	0.84764	0.99573	1.20113	-860	0.767018	1.08876	2.89312
-1543.5	0.84959	0.99178	1.20018	-880	0.726376	1.0295	2.75431
-1540.35	0.85038	0.99048	1.1998	-900	0.685688	0.970275	2.6155
-1537.2	0.85121	0.98668	1.19962	-920	0.645046	0.911055	2.4767
-1534.05	0.85225	0.98511	1.19984	-940	0.606193	0.853945	2.34197
-1530.9	0.85672	0.98137	1.20086	-960	0.580138	0.812018	2.22596
-1527.75	0.86014	0.97892	1.20062	-980	0.554128	0.770092	2.10991
-1524.6	0.86124	0.97583	1.20154	-1000	0.528119	0.728165	1.9939
-1521.45	0.8637	0.97373	1.20179	-1020	0.502064	0.686239	1.87784
-1518.3	0.86864	0.96989	1.20127	-1040	0.480046	0.650413	1.77064
-1515.15	0.87387	0.96798	1.20302	-1060	0.46078	0.618899	1.67142
-1512	0.87862	0.96515	1.20232	-1080	0.441495	0.587385	1.57216
-1508.85	0.88534	0.9615	1.20171	-1100	0.422225	0.555872	1.47294
-1505.7	0.89196	0.95808	1.2044	-1120	0.406894	0.530413	1.39028
-1502.55	0.89417	0.95622	1.20718	-1140	0.393472	0.50789	1.31789
-1499.4	0.89623	0.95464	1.20742	-1160	0.380046	0.485367	1.2455
-1496.25	0.9004	0.95181	1.20822	-1180	0.366619	0.462844	1.17307
-1493.1	0.90266	0.95157	1.20919	-1200	0.353266	0.440427	1.10069
-1489.95	0.90727	0.95072	1.20847	-1220	0.343078	0.424261	1.0406
-1486.8	0.91196	0.94931	1.20814	-1240	0.332894	0.408101	0.980642
-1483.65	0.91758	0.94671	1.20981	-1260	0.322711	0.391936	0.920688
-1480.5	0.92295	0.94342	1.21119	-1280	0.312876	0.376349	0.862798
-1477.35	0.92767	0.94063	1.2142	-1300	0.305803	0.365243	0.821009
-1474.2	0.9323	0.9383	1.21695	-1320	0.298729	0.354138	0.779174
-1471.05	0.9383	0.93611	1.21969	-1340	0.291656	0.343032	0.737339
-1467.9	0.94399	0.93418	1.2235	-1360	0.284578	0.331927	0.69555
-1464.75	0.9475	0.93134	1.22517	-1380	0.278427	0.322064	0.658349
-1461.6	0.95202	0.93022	1.22578	-1400	0.273239	0.313509	0.625092
-1458.45	0.95614	0.93037	1.22585	-1420	0.26805	0.304954	0.591881
-1455.3	0.95558	0.9291	1.22639	-1440	0.262862	0.296399	0.55867
-1452.15	0.95329	0.92774	1.22881	-1460	0.258734	0.289885	0.532569
-1449	0.9522	0.92746	1.22734	-1480	0.255275	0.284674	0.511055
-1445.85	0.95625	0.92713	1.22485	-1500	0.251817	0.279459	0.489495
-1442.7	0.9588	0.92689	1.22309	-1520	0.248362	0.274243	0.467982
-1439.55	0.96063	0.92497	1.22672	-1540	0.244931	0.269055	0.446445
-1436.4	0.96687	0.92388	1.22951	-1560	0.24239	0.26472	0.429491
-1433.25	0.97276	0.92054	1.23156	-1580	0.239844	0.260381	0.412615
-1430.1	0.98122	0.91869	1.23642	-1600	0.237298	0.256046	0.395739
-1426.95	0.99187	0.91293	1.2391	-1620	0.234858	0.251862	0.379564
-1423.8	1.00189	0.90931	1.2391	-1640	0.233261	0.248959	0.368362
-1420.65	1.00939	0.90524	1.24079	-1660	0.231665	0.24605	0.357156
-1417.5	1.01443	0.90214	1.24081	-1680	0.230069	0.243147	0.345954
-1414.35	1.01959	0.89673	1.24282	-1700	0.228472	0.240243	0.334752
-1411.2	1.02642	0.89381	1.24219	-1720	0.227069	0.237674	0.325372
-1408.05	1.02423	0.89095	1.2423	-1740	0.225876	0.235482	0.317115
-1404.9	1.02435	0.88644	1.24393	-1760	0.224683	0.233289	0.308862
-1401.75	1.0246	0.88532	1.24673	-1780	0.223491	0.231092	0.300606
-1398.6	1.02362	0.88444	1.2469	-1800	0.222642	0.229358	0.293784
-1395.45	1.02326	0.88283	1.24772	-1820	0.222	0.227908	0.288119
-1392.3	1.02389	0.88318	1.24938	-1840	0.221358	0.226454	0.282454
-1389.15	1.02858	0.88501	1.25018	-1860	0.220716	0.225005	0.276789
-1386	1.0341	0.88512	1.25055	-1880	0.220106	0.223596	0.271206
-1382.85	1.04111	0.88469	1.25303	-1900	0.219748	0.222505	0.266807
-1379.7	1.04655	0.88282	1.25252	-1920	0.219385	0.221413	0.262404
-1376.55	1.05288	0.88132	1.25157	-1940	0.219028	0.220321	0.258005
-1373.4	1.06078	0.87973	1.25472	-1960	0.218688	0.219257	0.253679
-1370.25	1.06768	0.87678	1.25324	-1980	0.218693	0.218638	0.250794
-1367.1	1.07926	0.87375	1.25593	-2000	0.218702	0.218018	0.247904
-1363.95	1.0867	0.87178	1.25526
-1360.8	1.09258	0.8692	1.25174
-1357.65	1.09652	0.86682	1.24739
-1354.5	1.10329	0.8633	1.24559
-1351.35	1.10731	0.8636	1.24506
-1348.2	1.11098	0.86311	1.24176
-1345.05	1.1116	0.86122	1.23819
-1341.9	1.1132	0.8598	1.23655
-1338.75	1.11849	0.86123	1.23665
-1335.6	1.125	0.86148	1.2361
-1332.45	1.12978	0.86189	1.23469
-1329.3	1.13661	0.86084	1.23354
-1326.15	1.14271	0.86048	1.23487
-1323	1.15048	0.86042	1.2364
-1319.85	1.15415	0.85973	1.23628
-1316.7	1.16064	0.85999	1.23726
-1313.55	1.16215	0.85899	1.23885
-1310.4	1.16524	0.85977	1.23971
-1307.25	1.16983	0.85864	1.24253
-1304.1	1.17256	0.85803	1.24457
-1300.95	1.17823	0.85813	1.24637
-1297.8	1.18201	0.85736	1.24993
-1294.65	1.18807	0.8556	1.25475
-1291.5	1.18922	0.85265	1.26062
-1288.35	1.19758	0.85118	1.26579
-1285.2	1.20349	0.84938	1.26906
-1282.05	1.20991	0.84875	1.27507
-1278.9	1.21309	0.84739	1.28128
-1275.75	1.22293	0.84707	1.28975
-1272.6	1.2276	0.84703	1.2982
-1269.45	1.23211	0.8478	1.30758
-1266.3	1.23762	0.84811	1.31938
-1263.15	1.24344	0.84876	1.33301
-1260	1.2478	0.85002	1.34841
-1256.85	1.25315	0.84925	1.36337
-1253.7	1.25704	0.84781	1.38
-1250.55	1.26297	0.84783	1.39687
-1247.4	1.26704	0.84459	1.40386
-1244.25	1.26883	0.8431	1.40725
-1241.1	1.27427	0.8414	1.40806
-1237.95	1.28263	0.83981	1.40399
-1234.8	1.29095	0.8362	1.39799
-1231.65	1.29538	0.83452	1.38754
-1228.5	1.30367	0.83475	1.3774
-1225.35	1.3174	0.83444	1.36629
-1222.2	1.33777	0.83404	1.35447
-1219.05	1.36062	0.83519	1.34629
-1215.9	1.39293	0.83572	1.34113
-1212.75	1.42759	0.83775	1.33691
-1209.6	1.46379	0.8398	1.33739
-1206.45	1.49921	0.84076	1.33834
-1203.3	1.53736	0.84182	1.33841
-1200.15	1.57511	0.8433	1.3389
-1197	1.60378	0.84524	1.33976
-1193.85	1.62666	0.84889	1.34255
-1190.7	1.64121	0.8525	1.34634
-1187.55	1.64349	0.85612	1.34997
-1184.4	1.63225	0.86035	1.35633
-1181.25	1.6154	0.86384	1.36016
-1178.1	1.59057	0.86695	1.36311
-1174.95	1.56684	0.87109	1.36774
-1171.8	1.55042	0.87584	1.37304
-1168.65	1.54578	0.8767	1.37721
-1165.5	1.54187	0.87784	1.38077
-1162.35	1.54564	0.87834	1.38439
-1159.2	1.54908	0.87931	1.3892
-1156.05	1.5501	0.88068	1.39631
-1152.9	1.55327	0.88154	1.39899
-1149.75	1.54896	0.88447	1.40142
-1146.6	1.54603	0.88628	1.40798
-1143.45	1.53842	0.89016	1.41262
-1140.3	1.5347	0.89251	1.41905
-1137.15	1.53267	0.89686	1.42401
-1134	1.54219	0.90072	1.4288
-1130.85	1.54981	0.9053	1.43452
-1127.7	1.55346	0.91092	1.44291
-1124.55	1.55918	0.91533	1.45112
-1121.4	1.5691	0.91901	1.45977
-1118.25	1.58184	0.9211	1.46993
-1115.1	1.58905	0.92375	1.48196
-1111.95	1.60118	0.92582	1.49034
-1108.8	1.61312	0.92601	1.49414
-1105.65	1.6226	0.92562	1.49472
-1102.5	1.63413	0.92459	1.49857
-1099.35	1.64578	0.92489	1.50145
-1096.2	1.66157	0.92485	1.50734
-1093.05	1.67269	0.92391	1.51057
-1089.9	1.68689	0.92634	1.51277
-1086.75	1.70091	0.92792	1.51743
-1083.6	1.71237	0.92971	1.52059
-1080.45	1.72114	0.93183	1.52525
-1077.3	1.7315	0.93531	1.53057
-1074.15	1.73343	0.94109	1.53228
-1071	1.74404	0.94638	1.5363
-1067.85	1.75149	0.95061	1.54324
-1064.7	1.75353	0.95649	1.54636
-1061.55	1.75662	0.96244	1.55411
-1058.4	1.76115	0.96616	1.55949
-1055.25	1.7659	0.96981	1.56659
-1052.1	1.77177	0.97403	1.57183
-1048.95	1.78463	0.9774	1.57621
-1045.8	1.79559	0.9811	1.5814
-1042.65	1.80526	0.982	1.58621
-1039.5	1.81788	0.98495	1.58937
-1036.35	1.83541	0.98758	1.59178
-1033.2	1.84981	0.99234	1.59448
-1030.05	1.86023	0.99457	1.59552
-1026.9	1.87546	0.99536	1.5981
-1023.75	1.88846	0.99707	1.59666
-1020.6	1.90866	0.99963	1.59668
-1017.45	1.93125	1.00094	1.59984
-1014.3	1.95292	1.00303	1.60244
-1011.15	1.97287	1.00473	1.60455
-1008	1.99885	1.00691	1.60766
-1004.85	2.01405	1.00849	1.61368
-1001.7	2.02764	1.01136	1.62278
-998.55	2.04039	1.01712	1.62918
-995.4	2.05596	1.02138	1.63516
-992.25	2.06089	1.02343	1.64333
-989.1	2.06597	1.02714	1.65074
-985.95	2.06733	1.03018	1.65798
-982.8	2.06836	1.0334	1.66347
-979.65	2.06741	1.03906	1.66544
-976.5	2.06929	1.04442	1.66539
-973.35	2.08019	1.04671	1.66827
-970.2	2.0916	1.04877	1.66976
-967.05	2.10543	1.05387	1.67568
-963.9	2.116	1.05679	1.68016
-960.75	2.13236	1.06119	1.68925
-957.6	2.15053	1.06479	1.69433
-954.45	2.1649	1.06737	1.69722
-951.3	2.18244	1.07274	1.70185
-948.15	2.19401	1.0778	1.70885
-945	2.20724	1.08283	1.71456
-941.85	2.21988	1.08919	1.7191
-938.7	2.24075	1.09311	1.71981
-935.55	2.25054	1.09411	1.72349
-932.4	2.25348	1.09423	1.72877
-929.25	2.25632	1.09827	1.73321
-926.1	2.25675	1.10119	1.74242
-922.95	2.252	1.1047	1.74842
-919.8	2.25091	1.11023	1.75702
-916.65	2.25072	1.11597	1.76478
-913.5	2.26098	1.12128	1.7716
-910.35	2.27209	1.12515	1.7811
-907.2	2.2899	1.13038	1.78746
-904.05	2.30179	1.1354	1.7942
-900.9	2.32117	1.14016	1.79956
-897.75	2.33546	1.14553	1.80697
-894.6	2.3533	1.15135	1.81364
-891.45	2.37142	1.15709	1.82177
-888.3	2.3802	1.16495	1.83029
-885.15	2.39028	1.17051	1.8407
-882	2.40264	1.17792	1.84448
-878.85	2.4069	1.18158	1.85125
-875.7	2.41271	1.1869	1.85813
-872.55	2.42474	1.19222	1.86959
-869.4	2.43024	1.19803	1.88332
-866.25	2.44084	1.20162	1.89877
-863.1	2.45594	1.20653	1.91207
-859.95	2.46385	1.21085	1.9243
-856.8	2.48183	1.21319	1.93493
-853.65	2.49445	1.21831	1.94325
-850.5	2.51443	1.22461	1.95079
-847.35	2.52904	1.22902	1.95748
-844.2	2.54008	1.23366	1.9636
-841.05	2.55779	1.23987	1.9655
-837.9	2.57404	1.24539	1.96555
-834.75	2.59943	1.25178	1.96745
-831.6	2.62491	1.25941	1.97111
-828.45	2.64287	1.26248	1.97449
-825.3	2.65836	1.26795	1.97895
-822.15	2.68044	1.27529	1.98588
-819	2.69415	1.28181	1.99249
-815.85	2.71216	1.28879	1.99843
-812.7	2.73848	1.29421	2.00352
-809.55	2.75527	1.30023	2.01158
-806.4	2.75999	1.30436	2.0203
-803.25	2.7758	1.30956	2.02943
-800.1	2.79189	1.31428	2.03811
-796.95	2.80763	1.32171	2.04764
-793.8	2.82245	1.3279	2.05808
-790.65	2.84047	1.33304	2.06483
-787.5	2.8622	1.33966	2.0744
-784.35	2.87795	1.34803	2.08157
-781.2	2.90133	1.35615	2.08709
-778.05	2.91259	1.36363	2.09298
-774.9	2.93081	1.37004	2.09434
-771.75	2.94968	1.37697	2.09991
-768.6	2.96474	1.38246	2.11038
-765.45	2.96941	1.38794	2.1191
-762.3	2.98686	1.39558	2.12604
-759.15	3.00189	1.40271	2.13318
-756	3.02936	1.40708	2.14073
-752.85	3.04759	1.41525	2.1536
-749.7	3.06177	1.42055	2.16822
-746.55	3.07967	1.43037	2.18076
-743.4	3.09038	1.4375	2.19325
-740.25	3.11683	1.44341	2.2049
-737.1	3.13331	1.44925	2.21356
-733.95	3.16105	1.45495	2.22615
-730.8	3.18923	1.4597	2.2368
-727.65	3.21853	1.46546	2.24935
-724.5	3.23131	1.47336	2.26057
-721.35	3.24371	1.47942	2.2727
-718.2	3.27346	1.48372	2.29693
-715.05	3.30629	1.49052	2.33103
-711.9	3.33735	1.49915	2.37221
-708.75	3.36522	1.5056	2.41985
-705.6	3.39426	1.51274	2.46832
-702.45	3.42014	1.52006	2.50924
-699.3	3.44608	1.52991	2.5478
-696.15	3.46385	1.53803	2.57757
-693	3.47804	1.54674	2.60449
-689.85	3.49361	1.55807	2.62502
-686.7	3.48745	1.56882	2.63954
-683.55	3.49442	1.58056	2.64731
-680.4	3.51769	1.59098	2.64111
-677.25	3.51965	1.60177	2.60595
-674.1	3.54942	1.61106	2.53538
-670.95	3.54925	1.61735	2.4657
-667.8	3.56804	1.62447	2.43134
-664.65	3.59836	1.63096	2.42695
-661.5	3.61358	1.63917	2.43462
-658.35	3.63246	1.64513	2.44767
-655.2	3.64471	1.65038	2.45815
-652.05	3.62864	1.65724	2.47143
-648.9	3.64893	1.66462	2.48497
-645.75	3.65599	1.67206	2.49568
-642.6	3.66562	1.68435	2.51341
-639.45	3.70552	1.69366	2.52726
-636.3	3.72339	1.70321	2.53835
-633.15	3.73037	1.7108	2.54549
-630	3.75301	1.71789	2.54877
-626.85	3.77631	1.7261	2.54795
-623.7	3.79302	1.73279	2.54796
-620.55	3.8068	1.7415	2.5573
-617.4	3.84033	1.74958	2.56991
-614.25	3.85609	1.75532	2.57817
-611.1	3.89897	1.76129	2.58042
-607.95	3.9218	1.7662	2.58476
-604.8	3.94734	1.77592	2.59419
-601.65	3.95393	1.78576	2.60358
-598.5	3.96855	1.79282	2.62079
-595.35	3.9761	1.80324	2.63379
-592.2	3.98729	1.81096	2.64838
-589.05	3.99733	1.81938	2.66421
-585.9	4.02606	1.82731	2.68057
-582.75	4.03189	1.8365	2.69556
-579.6	4.05646	1.84636	2.70231
-576.45	4.09208	1.8548	2.71634
-573.3	4.10544	1.86315	2.73917
-570.15	4.11436	1.86918	2.76632
-567	4.1231	1.87675	2.79643
-563.85	4.13565	1.88413	2.82389
-560.7	4.14144	1.89115	2.85634
-557.55	4.15165	1.90257	2.89421
-554.4	4.15829	1.91583	2.927
-551.25	4.18382	1.93097	2.96036
-548.1	4.1957	1.9431	2.98874
-544.95	4.22107	1.95906	3.01374
-541.8	4.25162	1.97261	3.02564
-538.65	4.26143	1.98619	3.03129
-535.5	4.28302	1.99501	3.02787
-532.35	4.31505	2.00342	3.02349
-529.2	4.33474	2.01015	3.00969
-526.05	4.35667	2.01949	2.98692
-522.9	4.38372	2.02667	2.9658
-519.75	4.39807	2.03454	2.95665
-516.6	4.4493	2.04444	2.94846
-513.45	4.47197	2.05103	2.95022
-510.3	4.46929	2.05624	2.95792
-507.15	4.48008	2.06646	2.96818
-504	4.4971	2.07465	2.97467
-500.85	4.52327	2.08387	2.98153
-497.7	4.56041	2.09132	2.98975
-494.55	4.58483	2.10112	2.99139
-491.4	4.59778	2.10889	3.00526
-488.25	4.6057	2.11522	3.01903
-485.1	4.64649	2.12022	3.03243
-481.95	4.68213	2.12938	3.04421
-478.8	4.71044	2.13831	3.05328
-475.65	4.75656	2.14318	3.06521
-472.5	4.79537	2.15428	3.0797
-469.35	4.81713	2.16725	3.09734
-466.2	4.84134	2.18022	3.10837
-463.05	4.87896	2.19469	3.12022
-459.9	4.91949	2.20566	3.13059
-456.75	4.96462	2.21703	3.13943
-453.6	4.98104	2.23301	3.15123
-450.45	5.00642	2.24465	3.16685
-447.3	5.01593	2.25461	3.18658
-444.15	5.03726	2.26567	3.19774
-441	5.05875	2.28036	3.20719
-437.85	5.09017	2.29419	3.21949
-434.7	5.10515	2.3044	3.23433
-431.55	5.12794	2.31928	3.25322
-428.4	5.15146	2.33574	3.26352
-425.25	5.15465	2.35161	3.27205
-422.1	5.18193	2.36621	3.28428
-418.95	5.19463	2.37902	3.30107
-415.8	5.21341	2.39226	3.32569
-412.65	5.21862	2.40728	3.35075
-409.5	5.24096	2.41611	3.37403
-406.35	5.25131	2.42328	3.39285
-403.2	5.28875	2.43299	3.41411
-400.05	5.30564	2.44366	3.42948
-396.9	5.34118	2.45755	3.44491
-393.75	5.34745	2.46631	3.46579
-390.6	5.36321	2.47749	3.47584
-387.45	5.39027	2.48747	3.48377
-384.3	5.41624	2.4992	3.48978
-381.15	5.4447	2.50933	3.49447
-378	5.47096	2.518	3.4896
-374.85	5.51393	2.5301	3.50085
-371.7	5.53676	2.53587	3.52073
-368.55	5.58798	2.54256	3.53253
-365.4	5.62517	2.54733	3.53893
-362.25	5.66354	2.55491	3.55266
-359.1	5.70531	2.56547	3.57009
-355.95	5.72389	2.57742	3.58399
-352.8	5.72754	2.59618	3.59635
-349.65	5.72725	2.60876	3.60759
-346.5	5.74349	2.62832	3.62191
-343.35	5.73889	2.64227	3.63241
-340.2	5.74487	2.654	3.64093
-337.05	5.75392	2.66537	3.64724
-333.9	5.76139	2.68015	3.66744
-330.75	5.75898	2.69305	3.68289
-327.6	5.80378	2.70471	3.69079
-324.45	5.85034	2.7172	3.70036
-321.3	5.88851	2.72813	3.71039
-318.15	5.91168	2.74425	3.72384
-315	5.95299	2.75718	3.74412
-311.85	5.98992	2.7688	3.75889
-308.7	6.01744	2.78539	3.77168
-305.55	6.03725	2.79986	3.78873
-302.4	6.06099	2.8143	3.80194
-299.25	6.10052	2.83021	3.8199
-296.1	6.12601	2.83974	3.83031
-292.95	6.16354	2.85228	3.84158
-289.8	6.19198	2.86477	3.85091
-286.65	6.23833	2.87537	3.86014
-283.5	6.22642	2.88713	3.87205
-280.35	6.23762	2.90214	3.88305
-277.2	6.2482	2.91505	3.90374
-274.05	6.2796	2.93296	3.92395
-270.9	6.28046	2.94797	3.94724
-267.75	6.34765	2.9654	3.96749
-264.6	6.37632	2.97799	3.9868
-261.45	6.40231	2.99306	4.01762
-258.3	6.44397	3.00895	4.06234
-255.15	6.43729	3.02577	4.11613
-252	6.43103	3.0443	4.1944
-248.85	6.43072	3.0647	4.27983
-245.7	6.4923	3.07943	4.36314
-242.55	6.52288	3.09496	4.44213
-239.4	6.55321	3.11336	4.5083
-236.25	6.56827	3.13121	4.5648
-233.1	6.5966	3.14975	4.61007
-229.95	6.62871	3.15909	4.65106
-226.8	6.64303	3.17425	4.68024
-223.65	6.68556	3.19168	4.69292
-220.5	6.71882	3.21131	4.67948
-217.35	6.6793	3.23003	4.6354
-214.2	6.71504	3.24794	4.5923
-211.05	6.69579	3.26863	4.55725
-207.9	6.69875	3.28971	4.53163
-204.75	6.68976	3.30871	4.50571
-201.6	6.72805	3.33253	4.496
-198.45	6.7835	3.35037	4.47291
-195.3	6.81717	3.3741	4.4492
-192.15	6.82288	3.39367	4.42965
-189	6.81746	3.41174	4.40791
-185.85	6.8688	3.43118	4.39878
-182.7	6.89282	3.44482	4.39222
-179.55	6.95925	3.45855	4.40424
-176.4	7.02694	3.46996	4.41301
-173.25	7.05245	3.48235	4.42461
-170.1	7.08952	3.49473	4.43916
-166.95	7.1435	3.5057	4.45147
-163.8	7.2055	3.52066	4.47592
-160.65	7.32088	3.53059	4.49854
-157.5	7.38243	3.54091	4.52056
-154.35	7.46013	3.55506	4.53535
-151.2	7.49473	3.56997	4.54222
-148.05	7.538	3.58524	4.55174
-144.9	7.57916	3.6024	4.56327
-141.75	7.56659	3.61863	4.55948
-138.6	7.62505	3.63455	4.56075
-135.45	7.70503	3.65201	4.58706
-132.3	7.71307	3.6781	4.58677
-129.15	7.71102	3.69842	4.58275
-126	7.7203	3.72119	4.59436
-122.85	7.71277	3.74469	4.62055
-119.7	7.70303	3.7627	4.64073
-116.55	7.75765	3.77895	4.66952
-113.4	7.80051	3.80362	4.70001
-110.25	7.83031	3.82617	4.72174
-107.1	7.84785	3.84252	4.76456
-103.95	7.87996	3.85695	4.80474
-100.8	7.89745	3.87046	4.83415
-97.65	7.91416	3.88413	4.87022
-94.5	7.8908	3.89885	4.9035
-91.35	7.96917	3.90826	4.93503
-88.2	8.01609	3.92905	4.96022
-85.05	8.09454	3.95097	4.98632
-81.9	8.13118	3.96586	5.00554
-78.75	8.17587	3.98537	5.02524
-75.6	8.18787	4.00816	5.04759
-72.45	8.17062	4.02962	5.06923
-69.3	8.13473	4.05169	5.08787
-66.15	8.14539	4.07431	5.107
-63	8.10989	4.09035	5.13013
-59.85	8.12062	4.10684	5.16283
-56.7	8.13682	4.12658	5.18376
-53.55	8.14323	4.14621	5.20407
-50.4	8.16609	4.16374	5.22569
-47.25	8.23506	4.18796	5.25316
-44.1	8.33199	4.20545	5.27129
-40.95	8.37804	4.22013	5.28402
-37.8	8.4162	4.22918	5.29406
-34.65	8.43169	4.24963	5.31155
-31.5	8.45584	4.2704	5.32482
-28.35	8.50842	4.28498	5.34972
-25.2	8.57952	4.30481	5.36392
-22.05	8.663	4.32251	5.38851
-18.9	8.68282	4.34501	5.41231
-15.75	8.69706	4.36374	5.43344
-12.6	8.7388	4.38633	5.45447
-9.45	8.78575	4.40983	5.47723
-6.3	8.87046	4.41828	5.50437
-3.15	8.93645	4.42774	5.51134
0	9.01578	4.44447	5.54209
3.15	9.05646	4.44933	5.55083
6.3	9.08953	4.46887	5.57504
9.45	9.11689	4.49092	5.59706
12.6	9.1095	4.50452	5.6179
15.75	9.13262	4.52656	5.63908
18.9	9.19641	4.54416	5.64872
22.05	9.25038	4.56271	5.65316
25.2	9.31321	4.57841	5.6697
28.35	9.35851	4.60381	5.68816
31.5	9.372	4.62465	5.71983
34.65	9.3847	4.64431	5.75194
37.8	9.43457	4.66209	5.78248
40.95	9.52824	4.67816	5.79894
44.1	9.58299	4.69894	5.82374
47.25	9.5807	4.72722	5.85694
50.4	9.60602	4.75129	5.88488
53.55	9.69481	4.76352	5.909
56.7	9.76021	4.7865	5.93753
59.85	9.78505	4.81044	5.95287
63	9.89418	4.82469	5.97298
66.15	9.96623	4.85121	6.00136
69.3	10.0164	4.87575	6.02605
72.45	10.0519	4.89838	6.04469
75.6	10.1178	4.91867	6.06466
78.75	10.2247	4.93567	6.09305
81.9	10.2751	4.95765	6.1196
85.05	10.3265	4.98411	6.13567
88.2	10.4096	5.00693	6.14893
91.35	10.5017	5.02646	6.15742
94.5	10.5794	5.05529	6.1687
97.65	10.644	5.07719	6.18309
100.8	10.7076	5.09692	6.20683
103.95	10.7351	5.12118	6.23416
107.1	10.7319	5.15463	6.24492
110.25	10.815	5.18641	6.26708
113.4	10.8489	5.20788	6.28751
116.55	10.8639	5.22538	6.31212
119.7	10.8642	5.24272	6.35372
122.85	10.8535	5.25836	6.37735
126	10.8462	5.27903	6.39595
129.15	10.8064	5.30209	6.41823
132.3	10.7815	5.33255	6.43527
135.45	10.7934	5.35635	6.45518
138.6	10.7977	5.37101	6.48296
141.75	10.7896	5.38921	6.49835
144.9	10.7649	5.41011	6.52512
148.05	10.8541	5.43333	6.54893
151.2	10.9537	5.45372	6.56623
154.35	11.0701	5.46511	6.5817
157.5	11.1667	5.47566	6.58853
160.65	11.3547	5.48002	6.60628
163.8	11.4475	5.48242	6.63632
166.95	11.6283	5.49372	6.65845
170.1	11.7378	5.50286	6.66138
173.25	11.9193	5.51505	6.67664
176.4	12.0203	5.51856	6.7012
179.55	12.1259	5.52926	6.72132
182.7	12.2639	5.54405	6.74602
185.85	12.3345	5.54601	6.76883
189	12.3226	5.57113	6.78654
192.15	12.402	5.59338	6.82181
195.3	12.4307	5.61813	6.84501
198.45	12.3217	5.64203	6.86943
201.6	12.2149	5.67904	6.89828
204.75	12.1566	5.7083	6.91482
207.9	12.1566	5.73426	6.94657
211.05	12.193	5.75984	6.96518
214.2	12.2869	5.77952	6.994
217.35	12.3272	5.7995	7.01623
220.5	12.3983	5.82971	7.03526
223.65	12.4844	5.85125	7.05338
226.8	12.5532	5.86424	7.06843
229.95	12.6338	5.90175	7.08568
233.1	12.6914	5.91882	7.1121
236.25	12.7225	5.94679	7.13295
239.4	12.7998	5.97035	7.1424
242.55	12.7703	6.0023	7.15887
245.7	12.7503	6.02957	7.17275
248.85	12.881	6.05701	7.18276
252	12.9427	6.08324	7.20245
255.15	13.0574	6.10984	7.22453
258.3	13.1311	6.13509	7.25691
261.45	13.1942	6.15203	7.28692
264.6	13.1813	6.17982	7.31278
267.75	13.2195	6.20584	7.34183
270.9	13.2069	6.21681	7.36226
274.05	13.2579	6.24158	7.39073
277.2	13.315	6.28035	7.40634
280.35	13.3322	6.31832	7.43716
283.5	13.3345	6.35971	7.47745
286.65	13.3279	6.41214	7.4867
289.8	13.3171	6.46162	7.49724
292.95	13.392	6.49559	7.51504
296.1	13.4509	6.53424	7.53624
299.25	13.4549	6.59793	7.57249
302.4	13.5066	6.65268	7.5934
305.55	13.5714	6.69636	7.61448
308.7	13.6845	6.741	7.6251
311.85	13.7161	6.78583	7.63863
315	13.7037	6.82227	7.67114
318.15	13.8493	6.86407	7.70408
321.3	13.9754	6.91803	7.71469
324.45	14.061	6.95955	7.73355
327.6	14.1649	6.99047	7.74416
330.75	14.1469	7.02803	7.75598
333.9	14.159	7.05744	7.78992
337.05	14.1976	7.0825	7.81424
340.2	14.2046	7.11704	7.85377
343.35	14.2257	7.13856	7.88834
346.5	14.307	7.15585	7.90456
349.65	14.3597	7.16423	7.93489
352.8	14.3884	7.17736	7.96127
355.95	14.4564	7.20587	7.98504
359.1	14.4889	7.24004	8.00966
362.25	14.4589	7.27967	8.01883
365.4	14.5122	7.31655	8.05789
368.55	14.4713	7.34763	8.08831
371.7	14.439	7.37522	8.11534
374.85	14.5428	7.40739	8.14393
378	14.5907	7.43953	8.14966
381.15	14.6096	7.46242	8.17859
384.3	14.5634	7.4945	8.2055
387.45	14.5998	7.51303	8.2287
390.6	14.6436	7.52759	8.24898
393.75	14.7215	7.55919	8.24686
396.9	14.8346	7.57718	8.26843
400.05	14.8314	7.59835	8.28169
403.2	14.9007	7.62509	8.29913
406.35	14.9572	7.65757	8.33186
409.5	14.9789	7.67526	8.35248
412.65	14.9805	7.69835	8.35422
415.8	14.977	7.71063	8.38082
418.95	15.0004	7.74054	8.3892
422.1	14.9471	7.77009	8.39988
425.25	14.9687	7.8084	8.42659
428.4	15.0491	7.84758	8.44328
431.55	15.0939	7.88913	8.46044
434.7	15.0973	7.92535	8.49335
437.85	15.1723	7.97559	8.53136
441	15.2461	8.01029	8.56297
444.15	15.3813	8.04401	8.58013
447.3	15.3762	8.08799	8.60442
450.45	15.3873	8.12082	8.64228
453.6	15.4644	8.14938	8.6753
456.75	15.4758	8.17841	8.70259
459.9	15.5692	8.21692	8.74221
463.05	15.65	8.24556	8.76154
466.2	15.7016	8.27194	8.78957
469.35	15.7853	8.28535	8.81074
472.5	15.8777	8.30098	8.839
475.65	15.8777	8.31711	8.85001
478.8	15.9425	8.33855	8.86638
481.95	15.9564	8.35961	8.86724
485.1	15.9477	8.37252	8.87024
488.25	15.9278	8.4038	8.90008
491.4	15.8948	8.41809	8.93415
494.55	15.9439	8.45677	8.97597
497.7	16.0185	8.48453	9.01799
500.85	16.0352	8.4847	9.06525
504	16.0238	8.52691	9.12414
507.15	16.0274	8.56988	9.17936
510.3	16.0123	8.60579	9.20917
513.45	16.0477	8.64317	9.26505
516.6	16.0707	8.66968	9.31299
519.75	16.1207	8.70298	9.35524
522.9	16.2004	8.73555	9.39145
526.05	16.263	8.76755	9.42703
529.2	16.2649	8.78334	9.4571
532.35	16.2965	8.7971	9.47556
535.5	16.2829	8.82613	9.46456
538.65	16.2841	8.86007	9.45903
541.8	16.2245	8.892	9.45658
544.95	16.1865	8.92088	9.45377
548.1	16.225	8.9445	9.44817
551.25	16.2963	8.98193	9.46212
554.4	16.4454	9.01311	9.47742
557.55	16.6092	9.0434	9.48181
560.7	16.7275	9.07949	9.507
563.85	16.8792	9.12246	9.52436
567	17.0727	9.14846	9.53854
570.15	17.2689	9.18238	9.53782
573.3	17.3563	9.21651	9.56184
576.45	17.572	9.25596	9.59499
579.6	17.7505	9.28789	9.6264
582.75	17.901	9.32534	9.65431
585.9	18.0929	9.36031	9.6937
589.05	18.3393	9.37896	9.73912
592.2	18.5584	9.4076	9.75612
595.35	18.48	9.44606	9.77836
598.5	18.1802	9.4997	9.79888
601.65	17.8185	9.52635	9.84062
604.8	17.4915	9.54681	9.85214
607.95	17.2939	9.55074	9.87448
611.1	17.1745	9.56896	9.8984
614.25	17.1685	9.59287	9.88645
617.4	17.1782	9.60175	9.91673
620.55	17.1316	9.60647	9.94438
623.7	17.1199	9.63196	9.97626
626.85	17.0487	9.64286	10.002
630	17.0154	9.67096	10.0148
633.15	16.9543	9.70211	10.0186
636.3	17.0472	9.72743	10.0201
639.45	17.1112	9.74798	10.0456
642.6	17.1565	9.75618	10.0623
645.75	17.1913	9.78754	10.0859
648.9	17.3134	9.80828	10.0922
652.05	17.4014	9.84376	10.0972
655.2	17.4903	9.86739	10.1456
658.35	17.5368	9.8793	10.1651
661.5	17.6165	9.92483	10.2007
664.65	17.6105	9.97061	10.2228
667.8	17.6652	10.0328	10.2217
670.95	17.7505	10.1057	10.2441
674.1	17.7994	10.1666	10.2597
677.25	17.7887	10.215	10.2462
680.4	17.8151	10.2571	10.2459
683.55	17.8133	10.2909	10.2483
686.7	17.8559	10.3171	10.2416
689.85	17.9168	10.3502	10.2298
693	17.9336	10.3965	10.2435
696.15	17.9961	10.4232	10.2437
699.3	17.9976	10.4425	10.2671
702.45	17.8995	10.4687	10.2805
705.6	17.9217	10.4803	10.3207
708.75	17.9844	10.4627	10.3424
711.9	17.9536	10.4944	10.344
715.05	18.035	10.5496	10.3431
718.2	18.0071	10.5834	10.3789
721.35	17.9052	10.6369	10.4092
724.5	17.893	10.6659	10.4075
727.65	17.7879	10.7142	10.4679
730.8	17.7756	10.763	10.5114
733.95	17.6359	10.8156	10.5355
737.1	17.5421	10.8763	10.5851
740.25	17.5378	10.9285	10.604
743.4	17.6385	10.9785	10.6339
746.55	17.7366	11.0168	10.6848
749.7	17.7894	11.0669	10.7455
752.85	17.892	11.1055	10.7751
756	18.0651	11.1412	10.799
759.15	18.2371	11.1937	10.8418
762.3	18.4498	11.2449	10.8839
765.45	18.6415	11.285	10.9273
768.6	18.7805	11.294	10.9439
771.75	18.9385	11.3334	10.9511
774.9	19.0455	11.369	10.9652
778.05	19.182	11.412	10.9941
781.2	19.2826	11.469	11.0048
784.35	19.3043	11.4873	11.0022
787.5	19.2892	11.5307	11.0091
790.65	19.2172	11.5968	11.0375
793.8	19.167	11.6578	11.1074
796.95	19.0123	11.7045	11.1486
800.1	18.9622	11.7553	11.1651
803.25	18.8383	11.8062	11.1895
806.4	18.7241	11.8494	11.2329
809.55	18.508	11.8783	11.261
812.7	18.4367	11.9184	11.2957
815.85	18.435	11.9859	11.3484
819	18.4192	12.037	11.3884
822.15	18.4509	12.0708	11.4214
825.3	18.5458	12.1029	11.428
828.45	18.5311	12.1651	11.4599
831.6	18.4779	12.2088	11.5128
834.75	18.4858	12.2572	11.5541
837.9	18.5781	12.2951	11.5669
841.05	18.6636	12.3451	11.5594
844.2	18.592	12.3955	11.5702
847.35	18.601	12.4627	11.6108
850.5	18.6099	12.507	11.6286
853.65	18.6888	12.573	11.6437
856.8	18.6071	12.6417	11.6757
859.95	18.561	12.6911	11.7019
863.1	18.5722	12.7441	11.7261
866.25	18.5905	12.8065	11.7723
869.4	18.5719	12.8364	11.794
872.55	18.7676	12.8904	11.8393
875.7	18.8081	12.924	11.8836
878.85	18.7903	12.9768	11.9261
882	18.7792	12.9953	11.9811
885.15	18.7254	13.0189	12.034
888.3	18.7633	13.0695	12.0477
891.45	18.8106	13.1037	12.0565
894.6	18.7648	13.1614	12.0808
897.75	18.7592	13.2203	12.1211
900.9	18.7033	13.2695	12.2021
904.05	18.7521	13.3241	12.2557
907.2	18.8083	13.356	12.3253
910.35	18.8829	13.4256	12.3678
913.5	18.9712	13.4875	12.3729
916.65	19.002	13.5054	12.401
919.8	18.9281	13.56	12.4382
922.95	18.9378	13.6278	12.4844
926.1	18.9707	13.6334	12.5493
929.25	18.8913	13.6771	12.6066
932.4	18.8727	13.6784	12.6396
935.55	18.9555	13.6979	12.6697
938.7	18.9856	13.7262	12.6751
941.85	19.0393	13.7231	12.7057
945	19.201	13.7214	12.7614
948.15	19.2649	13.7256	12.8003
951.3	19.3275	13.7494	12.8082
954.45	19.3994	13.7756	12.8149
957.6	19.4645	13.7905	12.8492
960.75	19.3953	13.804	12.8886
963.9	19.2687	13.8264	12.9214
967.05	19.2434	13.8374	12.9385
970.2	19.1778	13.8886	12.9712
973.35	19.183	13.932	12.9952
976.5	19.0741	13.9465	12.9898
979.65	19.0494	13.9933	13.0107
982.8	19.0501	14.0365	13.0149
985.95	19.1177	14.0724	13.0585
989.1	19.1306	14.11	13.1029
992.25	19.1183	14.1358	13.1529
995.4	19.1715	14.1436	13.1684
998.55	19.2024	14.1928	13.1773
1001.7	19.1734	14.2537	13.2165
1004.85	19.1502	14.3088	13.2431
1008	19.175	14.3582	13.266
1011.15	19.1809	14.3926	13.2936
1014.3	19.2764	14.4771	13.2934
1017.45	19.345	14.5184	13.3035
1020.6	19.3807	14.5361	13.3136
1023.75	19.3884	14.5594	13.2813
1026.9	19.3822	14.6018	13.259
1030.05	19.4851	14.6102	13.2916
1033.2	19.5178	14.5996	13.3172
1036.35	19.5115	14.5971	13.3514
1039.5	19.5767	14.6109	13.4059
1042.65	19.6299	14.5982	13.4432
1045.8	19.5832	14.6077	13.475
1048.95	19.671	14.6067	13.5082
1052.1	19.715	14.6152	13.5222
1055.25	19.7568	14.6347	13.5418
1058.4	19.8209	14.6378	13.571
1061.55	19.7878	14.6523	13.6063
1064.7	19.7956	14.6574	13.6129
1067.85	19.7456	14.6628	13.6184
1071	19.7482	14.677	13.6102
1074.15	19.7017	14.6796	13.6298
1077.3	19.7423	14.7134	13.6754
1080.45	19.7683	14.7287	13.7275
1083.6	19.7685	14.7339	13.7759
1086.75	19.7603	14.7338	13.797
1089.9	19.7348	14.7162	13.8149
1093.05	19.6962	14.7091	13.8393
1096.2	19.7291	14.7358	13.8721
1099.35	19.8166	14.7306	13.8661
1102.5	19.842	14.714	13.8878
1105.65	19.8284	14.7063	13.9018
1108.8	19.8173	14.7093	13.9096
1111.95	19.8877	14.7357	13.9339
1115.1	19.9291	14.7466	13.9372
1118.25	19.9503	14.7803	13.9876
1121.4	19.9482	14.824	13.9977
1124.55	19.9189	14.8894	14.0058
1127.7	19.9581	14.9562	14.0074
1130.85	19.9458	15.0592	14.0802
1134	19.9703	15.1356	14.132
1137.15	20.0453	15.1693	14.1277
1140.3	20.0577	15.2462	14.1401
1143.45	20.0893	15.3297	14.1557
1146.6	20.0886	15.4006	14.1898
1149.75	20.1587	15.4587	14.2078
1152.9	20.1176	15.4775	14.2386
1156.05	20.0504	15.5069	14.2587
1159.2	20.0029	15.5338	14.2726
1162.35	19.9269	15.5894	14.2853
1165.5	19.9361	15.6333	14.2587
1168.65	20.0428	15.6472	14.2643
1171.8	20.0035	15.6352	14.2726
1174.95	20.0254	15.6591	14.2791
1178.1	20.0071	15.6883	14.2649
1181.25	19.9881	15.681	14.299
1184.4	20.0123	15.715	14.3439
1187.55	19.9864	15.7497	14.4048
1190.7	20.0516	15.7725	14.4269
1193.85	20.0463	15.8432	14.482
1197	20.0585	15.916	14.5072
1200.15	20.1161	15.9381	14.5292
1203.3	20.0709	16.0034	14.5352
1206.45	20.1037	16.037	14.6203
1209.6	20.0558	16.0674	14.6508
1212.75	20.0762	16.1051	14.6892
1215.9	20.1378	16.127	14.7158
1219.05	20.2212	16.1337	14.7105
1222.2	20.2684	16.1606	14.7115
1225.35	20.278	16.1875	14.7278
1228.5	20.3501	16.2059	14.7372
1231.65	20.3657	16.2629	14.7671
1234.8	20.3933	16.2944	14.7842
1237.95	20.3245	16.3313	14.7367
1241.1	20.2729	16.3739	14.7411
1244.25	20.2489	16.3993	14.7791
1247.4	20.216	16.4308	14.822
1250.55	20.2163	16.4705	14.8628
1253.7	20.2653	16.5085	14.8929
1256.85	20.2805	16.5124	14.9446
1260	20.3108	16.5293	15.0136
1263.15	20.3	16.5666	15.0397
1266.3	20.3781	16.6059	15.0305
1269.45	20.4355	16.6512	15.0542
1272.6	20.5464	16.6676	15.0837
1275.75	20.6051	16.6789	15.0523
1278.9	20.5925	16.7131	15.0676
1282.05	20.6691	16.7182	15.058
1285.2	20.7866	16.7642	15.0739
1288.35	20.8107	16.7862	15.1214
1291.5	20.7955	16.7927	15.1562
1294.65	20.74	16.8156	15.2094
1297.8	20.6745	16.8461	15.292
1300.95	20.5876	16.8793	15.3005
1304.1	20.527	16.9043	15.3378
1307.25	20.4613	16.913	15.3699
1310.4	20.4927	16.9398	15.3909
1313.55	20.4513	16.9472	15.4179
1316.7	20.4782	16.9553	15.4176
1319.85	20.523	16.9707	15.4183
1323	20.5796	16.995	15.4219
1326.15	20.6021	17.0133	15.4133
1329.3	20.6262	16.9961	15.3974
1332.45	20.6953	17.0177	15.3922
1335.6	20.7744	17.0505	15.398
1338.75	20.7647	17.1125	15.3813
1341.9	20.7758	17.158	15.3895
1345.05	20.882	17.1491	15.4496
1348.2	20.9135	17.1684	15.5282
1351.35	20.8981	17.2011	15.5675
1354.5	20.764	17.2207	15.6097
1357.65	20.8016	17.2433	15.6623
1360.8	20.8076	17.2787	15.6554
1363.95	20.799	17.2918	15.6767
1367.1	20.8218	17.3011	15.7023
1370.25	20.7273	17.3093	15.7185
1373.4	20.748	17.3181	15.7323
1376.55	20.8043	17.3454	15.7631
1379.7	20.8998	17.3215	15.793
1382.85	20.8271	17.3788	15.815
1386	20.8402	17.4095	15.8277
1389.15	20.8119	17.4307	15.8168
1392.3	20.8302	17.4613	15.8055
1395.45	20.8512	17.4999	15.8328
1398.6	20.7934	17.523	15.8765
1401.75	20.7516	17.5505	15.9091
1404.9	20.7216	17.6011	15.9621
1408.05	20.8572	17.647	16.016
1411.2	20.9016	17.6822	16.0725
1414.35	21.0113	17.7208	16.0841
1417.5	21.0367	17.705	16.1058
1420.65	21.0893	17.7194	16.1063
1423.8	21.0477	17.7141	16.1582
1426.95	21.0105	17.7085	16.1759
1430.1	20.9097	17.7274	16.1939
1433.25	20.8116	17.7506	16.2062
1436.4	20.7427	17.7644	16.2304
1439.55	20.562	17.7546	16.279
1442.7	20.5523	17.7445	16.2923
1445.85	20.4855	17.7585	16.2707
1449	20.4866	17.768	16.2922
1452.15	20.4734	17.795	16.3327
1455.3	20.4687	17.8475	16.4246
1458.45	20.5664	17.8816	16.4683
1461.6	20.6673	17.8809	16.4801
1464.75	20.7827	17.8938	16.4561
1467.9	20.9434	17.9234	16.4766
1471.05	20.9496	17.9472	16.4851
1474.2	21.0031	17.9673	16.5159
1477.35	21.0499	17.9855	16.5171
1480.5	21.124	18.0037	16.524
1483.65	21.1271	18.0114	16.5323
1486.8	21.1364	18.0097	16.5981
1489.95	20.996	18.0151	16.6091
1493.1	20.8321	18.0176	16.6033
1496.25	20.7977	18.0205	16.6279
1499.4	20.8475	18.0402	16.6475
1502.55	20.8226	18.0459	16.6817
1505.7	20.8417	18.0988	16.691
1508.85	20.8449	18.1145	16.7184
1512	20.8825	18.1462	16.7575
1515.15	21.0126	18.194	16.7629
1518.3	21.182	18.2827	16.7613
1521.45	21.1929	18.3431	16.7703
1524.6	21.2179	18.3565	16.7897
1527.75	21.1992	18.3746	16.8341
1530.9	21.1217	18.3496	16.852
1534.05	21.1613	18.3345	16.8513
1537.2	21.1766	18.3241	16.8571
1540.35	21.2272	18.3346	16.839
1543.5	21.196	18.3342	16.8124
1546.65	21.194	18.3321	16.8481
1549.8	21.21	18.3315	16.845
1552.95	21.1451	18.3534	16.8415
1556.1	21.1756	18.3734	16.8449
1559.25	21.1341	18.4245	16.8812
1562.4	21.0511	18.4518	16.9557
1565.55	20.9433	18.4644	17.0145
1568.7	20.9163	18.4678	17.0256
1571.85	20.9153	18.4962	17.0517
1575	20.9434	18.4935	17.0896
1578.15	20.9678	18.5082	17.1315
1581.3	20.9552	18.5272	17.1563
1584.45	21.0041	18.541	17.1651
1587.6	21.0737	18.5694	17.1692
1590.75	21.1656	18.595	17.1784
1593.9	21.1974	18.605	17.1614
1597.05	21.1575	18.6284	17.1623
1600.2	21.2651	18.6514	17.2001
1603.35	21.2831	18.6412	17.202
1606.5	21.3152	18.6358	17.2429
1609.65	21.3623	18.6647	17.2194
1612.8	21.3321	18.6847	17.2127
1615.95	21.3137	18.7128	17.2624
1619.1	21.2293	18.7317	17.3348
1622.25	21.3012	18.7318	17.3382
1625.4	21.3109	18.7825	17.3734
1628.55	21.2819	18.7902	17.3981
1631.7	21.2325	18.7926	17.4186
1634.85	21.2523	18.7706	17.4687
1638	21.2739	18.7514	17.4699
1641.15	21.2378	18.7378	17.4554
1644.3	21.3106	18.7263	17.3936
1647.45	21.3408	18.7272	17.4046
1650.6	21.3413	18.7342	17.3844
1653.75	21.3172	18.726	17.3758
1656.9	21.287	18.7213	17.3842
1660.05	21.2197	18.7243	17.3843
1663.2	21.0629	18.742	17.4058
1666.35	21.0713	18.77	17.4971
1669.5	21.105	18.8149	17.5026
1672.65	21.1304	18.8299	17.547
1675.8	21.1143	18.8322	17.5566
1678.95	21.099	18.8446	17.5501
1682.1	21.0571	18.8608	17.5148
1685.25	21.2109	18.8839	17.54
1688.4	21.2485	18.8836	17.5227
1691.55	21.3714	18.8811	17.4946
1694.7	21.4677	18.9022	17.4892
1697.85	21.5279	18.9011	17.548
1701	21.5204	18.9094	17.5814
1704.15	21.5518	18.9236	17.5839
1707.3	21.51	18.9307	17.5783
1710.45	21.499	18.966	17.6191
1713.6	21.3362	18.952	17.687
1716.75	21.3205	18.942	17.7331
1719.9	21.2226	18.965	17.7811
1723.05	21.2534	18.9844	17.7463
1726.2	21.2269	18.9649	17.752
1729.35	21.2349	18.9764	17.7781
1732.5	21.1216	18.9861	17.8028
1735.65	21.2507	19.0023	17.8502
1738.8	21.2759	19.045	17.8484
1741.95	21.321	19.0768	17.7855
1745.1	21.3698	19.1102	17.7918
1748.25	21.4384	19.1414	17.8319
1751.4	21.5857	19.1583	17.8562
1754.55	21.6338	19.2156	17.8664
1757.7	21.7346	19.248	17.9004
1760.85	21.6398	19.2424	17.9268
1764	21.6813	19.2249	17.8889
1767.15	21.7022	19.2052	17.9017
1770.3	21.702	19.192	17.9607
1773.45	21.5721	19.1849	18.0379
1776.6	21.6002	19.1796	18.0849
1779.75	21.5676	19.1738	18.1431
1782.9	21.607	19.1591	18.1698
1786.05	21.5507	19.1903	18.1696
1789.2	21.6533	19.1821	18.163
1792.35	21.6733	19.1862	18.2349
1795.5	21.6154	19.2051	18.2468
1798.65	21.6818	19.2223	18.2676
1801.8	21.5913	19.2402	18.2133
1804.95	21.4033	19.2579	18.1932
1808.1	21.3656	19.2802	18.228
1811.25	21.3047	19.3061	18.262
1814.4	21.3144	19.3146	18.2869
1817.55	21.341	19.3212	18.3196
1820.7	21.2611	19.3301	18.3302
1823.85	21.1205	19.3263	18.3908
1827	20.834	19.3178	18.3915
1830.15	20.7618	19.3023	18.467
1833.3	20.7486	19.3492	18.519
1836.45	20.7542	19.3776	18.589
1839.6	20.9026	19.3889	18.6226
1842.75	20.8914	19.3872	18.6385
1845.9	21.0114	19.3851	18.7004
1849.05	21.168	19.4221	18.7017
1852.2	21.3166	19.4533	18.6974
1855.35	21.5518	19.4782	18.6738
1858.5	21.6643	19.4465	18.649
1861.65	21.7101	19.4191	18.6682
1864.8	21.6555	19.4261	18.6209
1867.95	21.6517	19.4362	18.5841
1871.1	21.6582	19.4195	18.5204
1874.25	21.5345	19.44	18.5511
1877.4	21.475	19.4627	18.5902
1880.55	21.3874	19.4854	18.6184
1883.7	21.3628	19.4962	18.6678
1886.85	21.3377	19.5049	18.6704
1890	21.3709	19.5111	18.7317
1893.15	21.3534	19.5214	18.7259
1896.3	21.3654	19.5393	18.7672
1899.45	21.4191	19.562	18.8134
1902.6	21.4147	19.5816	18.8814
1905.75	21.4791	19.6194	18.9256
1908.9	21.481	19.6212	18.9856
1912.05	21.3317	19.6312	18.9791
1915.2	21.3	19.6618	18.9607
1918.35	21.2196	19.6661	18.9807
1921.5	21.2049	19.7109	18.9883
1924.65	21.2209	19.7325	18.975
1927.8	21.2488	19.7462	19.0021
1930.95	21.2275	19.7443	19.0174
1934.1	21.268	19.7517	19.0631
1937.25	21.2363	19.7439	19.0888
1940.4	21.36	19.7589	19.0909
1943.55	21.3082	19.7656	19.1103
1946.7	21.2807	19.7813	19.0962
1949.85	21.334	19.8247	19.1034
1953	21.3665	19.8464	19.1435
1956.15	21.4083	19.8467	19.1675
1959.3	21.3679	19.8359	19.169
1962.45	21.3548	19.8138	19.1406
1965.6	21.4198	19.8028	19.1461
1968.75	21.4475	19.7931	19.1397
1971.9	21.5044	19.8063	19.191
1975.05	21.5806	19.8299	19.2226
1978.2	21.6412	19.8106	19.2132
1981.35	21.5625	19.7818	19.2016
1984.5	21.5852	19.7233	19.183
1987.65	21.5473	19.7092	19.2078
1990.8	21.5083	19.7486	19.2647
1993.95	21.3708	19.7807	19.2779
1997.1	21.358	19.8232	19.2705
