# Supplementary material for: Hypoxia triggers collective aerotactic migration in Dictyostelium discoideum
Source: eLife. 2021 Aug 20;10:e64731. doi: 10.7554/eLife.64731 (PMC8378850; doi:10.7554/eLife.64731)
Supplement: Figure 2—figure supplement 6—source data 1. [file elife-64731-fig2-figsupp6-data1.xlsx]

## Sheet: Figure 2 figure supplement 6 
Figure 2 figure supplement 6
Podition relative to median axis (µm)	O2 (%) (t=5) %	O2 (%) (t=10) %	O2 (%) (t=15) %	O2 (%) (t=20) %	O2 (%) (t=25) %	O2 (%) (t=30) %
-3503.5	13.2539	8.2109	6.414	5.4089	4.8908	4.6991
-3500.25	13.151	8.1393	6.36	5.3674	4.8539	4.6627
-3497	13.1421	8.1077	6.3414	5.3497	4.8356	4.6407
-3493.75	13.101	8.0815	6.3106	5.3392	4.8239	4.6258
-3490.5	13.0758	8.0764	6.284	5.3281	4.8011	4.6072
-3487.25	13.0364	8.0562	6.2669	5.303	4.7797	4.5872
-3484	13.0226	8.0271	6.2472	5.2812	4.7615	4.5682
-3480.75	12.963	7.9678	6.2028	5.2429	4.7264	4.5341
-3477.5	12.9178	7.9328	6.1566	5.2125	4.6902	4.5035
-3474.25	12.8298	7.8977	6.1217	5.1965	4.6616	4.4803
-3471	12.8043	7.8935	6.1245	5.1941	4.6589	4.4746
-3467.75	12.7796	7.864	6.1017	5.1617	4.6365	4.4544
-3464.5	12.724	7.8057	6.0617	5.1214	4.6104	4.4293
-3461.25	12.7362	7.7655	6.0485	5.1055	4.5913	4.414
-3458	12.6895	7.7399	6.0185	5.085	4.5745	4.3913
-3454.75	12.6807	7.7347	6.0004	5.0646	4.5611	4.3803
-3451.5	12.6756	7.7062	5.9944	5.0565	4.559	4.3771
-3448.25	12.6763	7.6702	5.9834	5.0478	4.5525	4.3645
-3445	12.6091	7.6532	5.9666	5.0283	4.5318	4.343
-3441.75	12.5665	7.6398	5.9362	4.9992	4.5103	4.3255
-3438.5	12.4926	7.5889	5.8739	4.9468	4.4744	4.289
-3435.25	12.4572	7.5434	5.8389	4.9254	4.4497	4.2639
-3432	12.449	7.5294	5.8276	4.9113	4.4291	4.2552
-3428.75	12.4632	7.5298	5.8159	4.8991	4.4228	4.2515
-3425.5	12.4381	7.4926	5.7882	4.8795	4.4009	4.2273
-3422.25	12.373	7.4448	5.7482	4.8499	4.3777	4.2044
-3419	12.3057	7.3928	5.6997	4.8125	4.3431	4.1775
-3415.75	12.2921	7.3764	5.6932	4.7993	4.3332	4.1678
-3412.5	12.2876	7.3617	5.6812	4.7875	4.3195	4.1575
-3409.25	12.2247	7.3072	5.6501	4.757	4.2962	4.1307
-3406	12.21	7.2785	5.6286	4.7421	4.2787	4.1122
-3402.75	12.1864	7.2512	5.6009	4.7323	4.2637	4.0963
-3399.5	12.0533	7.1963	5.5493	4.6911	4.2189	4.0531
-3396.25	12.0096	7.177	5.5263	4.6738	4.2097	4.0408
-3393	12.0326	7.189	5.5401	4.6817	4.2143	4.0459
-3389.75	12.0369	7.1816	5.533	4.6766	4.2084	4.0415
-3386.5	12.1225	7.2186	5.5418	4.6962	4.2286	4.0537
-3383.25	12.0778	7.1811	5.525	4.672	4.212	4.0404
-3380	12.0759	7.1741	5.5187	4.6643	4.2008	4.0341
-3376.75	12.0582	7.1705	5.5115	4.6466	4.1877	4.022
-3373.5	12.0284	7.1194	5.4941	4.6293	4.1747	4.0073
-3370.25	11.9863	7.0732	5.4642	4.5953	4.1478	3.9842
-3367	11.9043	7.0205	5.4231	4.5582	4.1185	3.9499
-3363.75	11.7924	6.9415	5.3584	4.5033	4.0698	3.9076
-3360.5	11.803	6.934	5.3522	4.4977	4.0652	3.8956
-3357.25	11.7807	6.9259	5.3472	4.4894	4.0628	3.8947
-3354	11.7602	6.8992	5.327	4.4822	4.0493	3.8854
-3350.75	11.7782	6.9076	5.3391	4.486	4.0618	3.8927
-3347.5	11.8079	6.9293	5.36	4.5054	4.0796	3.9089
-3344.25	11.8906	6.9797	5.3976	4.5329	4.1107	3.9413
-3341	11.8605	6.9532	5.3783	4.5197	4.0954	3.9285
-3337.75	11.8842	6.9526	5.3761	4.525	4.1017	3.9362
-3334.5	11.892	6.9442	5.3603	4.5162	4.0935	3.9377
-3331.25	11.8752	6.9231	5.3327	4.496	4.0735	3.916
-3328	11.7629	6.8489	5.2754	4.4468	4.0249	3.8793
-3324.75	11.7051	6.8135	5.2384	4.4201	3.9952	3.8569
-3321.5	11.6741	6.7708	5.198	4.3853	3.9707	3.8294
-3318.25	11.5485	6.6845	5.1246	4.3313	3.9146	3.7765
-3315	11.4653	6.6182	5.0678	4.2804	3.8644	3.7324
-3311.75	11.3771	6.579	5.0304	4.2434	3.834	3.7
-3308.5	11.2798	6.5307	4.9937	4.2094	3.8039	3.6673
-3305.25	11.2518	6.4932	4.9628	4.1813	3.7806	3.6419
-3302	11.2491	6.4653	4.9439	4.1586	3.762	3.6186
-3298.75	11.1621	6.4121	4.8989	4.1151	3.7222	3.5841
-3295.5	11.1329	6.3813	4.8659	4.087	3.6997	3.5579
-3292.25	11.1315	6.3564	4.8451	4.069	3.6846	3.5415
-3289	11.1614	6.3536	4.8522	4.0721	3.6851	3.5413
-3285.75	11.151	6.3492	4.8484	4.0695	3.6812	3.5403
-3282.5	11.1372	6.3224	4.8285	4.051	3.6687	3.5264
-3279.25	11.0955	6.2884	4.8015	4.0293	3.6476	3.5038
-3276	11.0795	6.2708	4.7916	4.0192	3.6413	3.4961
-3272.75	11.0752	6.2662	4.7838	4.0146	3.6389	3.4983
-3269.5	11.0441	6.2485	4.7718	4.0023	3.6249	3.4853
-3266.25	11.0458	6.2309	4.7611	3.9917	3.618	3.4782
-3263	10.9901	6.1857	4.7356	3.9637	3.5945	3.4507
-3259.75	11.0007	6.1591	4.71	3.9476	3.5789	3.4339
-3256.5	10.9632	6.1206	4.6693	3.9126	3.548	3.4072
-3253.25	10.9143	6.0692	4.6331	3.8829	3.5153	3.3725
-3250	10.8907	6.0247	4.5887	3.8458	3.4867	3.3474
-3246.75	10.8251	5.9782	4.5471	3.8076	3.4499	3.3098
-3243.5	10.7404	5.9203	4.4978	3.7702	3.4116	3.2708
-3240.25	10.6603	5.8827	4.4668	3.7402	3.3842	3.247
-3237	10.6455	5.8678	4.4439	3.7241	3.3706	3.2265
-3233.75	10.5976	5.8275	4.4144	3.7022	3.3449	3.2089
-3230.5	10.5621	5.7954	4.3873	3.6793	3.3225	3.1874
-3227.25	10.5701	5.7953	4.384	3.6772	3.3201	3.1838
-3224	10.544	5.7682	4.365	3.6644	3.3052	3.1721
-3220.75	10.5111	5.7485	4.3516	3.6569	3.299	3.1601
-3217.5	10.453	5.7229	4.3214	3.6318	3.2746	3.1407
-3214.25	10.4905	5.7129	4.3179	3.6269	3.2716	3.1391
-3211	10.4537	5.6747	4.2868	3.6038	3.2552	3.1186
-3207.75	10.4739	5.6642	4.2786	3.5927	3.2404	3.1128
-3204.5	10.4284	5.621	4.2452	3.5669	3.2222	3.09
-3201.25	10.4147	5.5888	4.2271	3.5457	3.206	3.0757
-3198	10.3268	5.5455	4.1907	3.5147	3.1771	3.0468
-3194.75	10.2572	5.5169	4.1666	3.4974	3.1617	3.0359
-3191.5	10.2136	5.4924	4.1518	3.4788	3.1464	3.0207
-3188.25	10.1918	5.4619	4.1239	3.4617	3.1311	3.0086
-3185	10.1788	5.4229	4.0987	3.4399	3.1109	2.9859
-3181.75	10.1092	5.3848	4.0657	3.4119	3.0844	2.9658
-3178.5	10.0032	5.3358	4.0297	3.386	3.0566	2.941
-3175.25	9.9504	5.3153	4.0134	3.3689	3.0422	2.9277
-3172	9.9428	5.2963	3.9982	3.3566	3.0303	2.9221
-3168.75	9.9262	5.2687	3.9758	3.3376	3.0164	2.9046
-3165.5	9.9344	5.2533	3.9655	3.327	3.004	2.8989
-3162.25	9.8936	5.2357	3.9402	3.3057	2.9888	2.8779
-3159	9.8843	5.2259	3.9326	3.2988	2.9792	2.874
-3155.75	9.8228	5.2043	3.9162	3.2856	2.9702	2.8595
-3152.5	9.777	5.1824	3.9024	3.2678	2.9526	2.8471
-3149.25	9.7331	5.1544	3.8799	3.2504	2.9389	2.8292
-3146	9.6929	5.1303	3.8557	3.2301	2.9211	2.8113
-3142.75	9.6955	5.1154	3.8463	3.2248	2.9116	2.8004
-3139.5	9.692	5.0851	3.831	3.207	2.8977	2.7887
-3136.25	9.6817	5.0764	3.8206	3.2002	2.8907	2.7794
-3133	9.6582	5.0607	3.8013	3.1865	2.8756	2.7637
-3129.75	9.5751	5.0018	3.7701	3.1549	2.8466	2.7403
-3126.5	9.5558	4.9896	3.7567	3.1463	2.8404	2.7292
-3123.25	9.5978	4.9935	3.7545	3.1441	2.8378	2.7288
-3120	9.5797	4.9758	3.7485	3.1391	2.8352	2.7236
-3116.75	9.5448	4.974	3.7393	3.1277	2.8264	2.7166
-3113.5	9.5576	4.975	3.7357	3.1286	2.8267	2.7167
-3110.25	9.558	4.9657	3.7322	3.124	2.8244	2.7145
-3107	9.5785	4.9752	3.7364	3.1254	2.827	2.7134
-3103.75	9.6057	4.9833	3.7427	3.1287	2.832	2.7203
-3100.5	9.5935	4.9767	3.7328	3.1229	2.828	2.7153
-3097.25	9.5808	4.955	3.7221	3.1126	2.8197	2.7074
-3094	9.5771	4.937	3.7053	3.1008	2.8075	2.697
-3090.75	9.5251	4.9192	3.6871	3.0833	2.7963	2.684
-3087.5	9.4877	4.8884	3.6647	3.0633	2.7769	2.665
-3084.25	9.4555	4.8604	3.6416	3.0474	2.7601	2.6504
-3081	9.4083	4.8297	3.6165	3.0261	2.7389	2.6314
-3077.75	9.346	4.8003	3.5949	3.0046	2.7207	2.6161
-3074.5	9.2847	4.7629	3.5639	2.9811	2.6981	2.5927
-3071.25	9.2467	4.7257	3.5335	2.9568	2.673	2.573
-3068	9.2093	4.6981	3.5144	2.9371	2.6574	2.5579
-3064.75	9.1674	4.6733	3.4965	2.9224	2.6431	2.5433
-3061.5	9.1027	4.6433	3.4652	2.8987	2.621	2.5222
-3058.25	9.1047	4.63	3.4586	2.8943	2.6147	2.5183
-3055	9.1154	4.6202	3.4491	2.8859	2.608	2.5098
-3051.75	9.0945	4.5978	3.4321	2.8719	2.5955	2.4976
-3048.5	9.1163	4.5919	3.4306	2.8705	2.5949	2.4953
-3045.25	9.0724	4.571	3.4098	2.8552	2.5802	2.4812
-3042	9.0603	4.5547	3.3974	2.84	2.567	2.4685
-3038.75	9.0012	4.5257	3.3738	2.8218	2.5519	2.4531
-3035.5	9.0135	4.5281	3.3693	2.8207	2.5505	2.4523
-3032.25	8.9954	4.5156	3.3616	2.8104	2.5414	2.4453
-3029	8.9576	4.4972	3.3453	2.7983	2.5316	2.4368
-3025.75	8.9514	4.4823	3.3312	2.7837	2.5235	2.4298
-3022.5	8.9532	4.4717	3.3182	2.7756	2.5159	2.4239
-3019.25	8.9072	4.44	3.2935	2.7551	2.4961	2.4076
-3016	8.874	4.4071	3.2698	2.7341	2.4787	2.3909
-3012.75	8.8538	4.37	3.2465	2.7152	2.4628	2.373
-3009.5	8.7923	4.3465	3.2213	2.6938	2.4444	2.3561
-3006.25	8.767	4.3137	3.2022	2.6763	2.4291	2.339
-3003	8.7346	4.2884	3.1829	2.6615	2.4138	2.3248
-2999.75	8.6955	4.259	3.1578	2.64	2.3942	2.3031
-2996.5	8.6613	4.2384	3.1405	2.6273	2.3807	2.2913
-2993.25	8.6775	4.2334	3.1417	2.6246	2.3783	2.2858
-2990	8.7173	4.2443	3.1417	2.6266	2.3816	2.2899
-2986.75	8.727	4.2408	3.1407	2.6232	2.3772	2.2869
-2983.5	8.7138	4.2301	3.1279	2.613	2.3685	2.2788
-2980.25	8.6785	4.2133	3.1134	2.6007	2.3582	2.2678
-2977	8.6873	4.2125	3.1085	2.5982	2.3536	2.2667
-2973.75	8.6983	4.2113	3.1046	2.5949	2.3492	2.2626
-2970.5	8.6724	4.2009	3.0955	2.5864	2.3422	2.2553
-2967.25	8.6507	4.1824	3.0755	2.5707	2.3268	2.2415
-2964	8.612	4.1589	3.0601	2.5529	2.3116	2.2288
-2960.75	8.5672	4.1259	3.031	2.5323	2.293	2.2096
-2957.5	8.5137	4.0903	3.0033	2.5081	2.2706	2.1883
-2954.25	8.4673	4.0663	2.9811	2.4901	2.2547	2.173
-2951	8.4346	4.044	2.9623	2.4753	2.2414	2.1608
-2947.75	8.3924	4.0233	2.9426	2.4585	2.2268	2.1484
-2944.5	8.3508	4.0011	2.9247	2.4453	2.2149	2.1367
-2941.25	8.3219	3.9856	2.9114	2.4303	2.2039	2.1258
-2938	8.3103	3.9685	2.8994	2.4217	2.1947	2.1176
-2934.75	8.2803	3.9506	2.8837	2.4084	2.1827	2.1053
-2931.5	8.2697	3.9335	2.8715	2.3991	2.1731	2.0952
-2928.25	8.2853	3.9348	2.8696	2.3961	2.1695	2.0922
-2925	8.2616	3.9175	2.8601	2.3865	2.1622	2.0846
-2921.75	8.2315	3.8981	2.8444	2.3759	2.1498	2.0736
-2918.5	8.226	3.8847	2.833	2.367	2.1424	2.0672
-2915.25	8.1838	3.8519	2.8111	2.3474	2.1251	2.0499
-2912	8.1375	3.8157	2.7835	2.3262	2.1036	2.0308
-2908.75	8.0991	3.7884	2.7638	2.3072	2.0883	2.0145
-2905.5	8.0457	3.7463	2.7359	2.2841	2.0674	1.9944
-2902.25	8	3.7217	2.7154	2.267	2.0533	1.9794
-2899	7.979	3.7071	2.7038	2.255	2.0427	1.9688
-2895.75	7.9753	3.7064	2.6991	2.2525	2.0401	1.966
-2892.5	7.9497	3.689	2.6884	2.2396	2.0293	1.955
-2889.25	7.9478	3.6771	2.6799	2.2321	2.0231	1.9484
-2886	7.9667	3.6767	2.6746	2.2263	2.0189	1.9459
-2882.75	7.9551	3.6648	2.6632	2.2166	2.0099	1.9364
-2879.5	7.9423	3.6485	2.652	2.2059	2.0014	1.9297
-2876.25	7.9223	3.6342	2.6391	2.1955	1.9926	1.9194
-2873	7.9028	3.6198	2.6293	2.1852	1.9826	1.9122
-2869.75	7.909	3.6139	2.6221	2.1784	1.9765	1.9069
-2866.5	7.9236	3.603	2.6149	2.1732	1.9708	1.902
-2863.25	7.8989	3.5857	2.6013	2.1606	1.9594	1.8912
-2860	7.8822	3.565	2.5848	2.1477	1.9473	1.8801
-2856.75	7.8613	3.5482	2.5705	2.1383	1.938	1.8703
-2853.5	7.8197	3.5226	2.5503	2.1222	1.9226	1.8556
-2850.25	7.8333	3.5165	2.5436	2.1169	1.9174	1.8509
-2847	7.8036	3.4968	2.529	2.1036	1.9065	1.8395
-2843.75	7.7627	3.4778	2.5104	2.0889	1.8937	1.8268
-2840.5	7.7237	3.4542	2.493	2.0738	1.8796	1.8129
-2837.25	7.6857	3.4301	2.4777	2.0592	1.8674	1.8003
-2834	7.663	3.4179	2.4675	2.0505	1.8595	1.7923
-2830.75	7.628	3.4	2.4538	2.0382	1.8488	1.7817
-2827.5	7.6031	3.3885	2.4439	2.0278	1.8409	1.7726
-2824.25	7.6035	3.3822	2.4406	2.0236	1.8364	1.7688
-2821	7.5983	3.3752	2.4318	2.0188	1.8303	1.7646
-2817.75	7.5432	3.3498	2.4137	2.0034	1.8169	1.7514
-2814.5	7.5098	3.3314	2.399	1.9916	1.8044	1.7395
-2811.25	7.5121	3.3237	2.3914	1.9856	1.7993	1.735
-2808	7.5063	3.3209	2.3866	1.9817	1.7959	1.7325
-2804.75	7.4998	3.3064	2.3755	1.9738	1.7877	1.725
-2801.5	7.4905	3.2919	2.3633	1.9625	1.7785	1.7158
-2798.25	7.487	3.2757	2.3519	1.9546	1.7718	1.7089
-2795	7.4678	3.2608	2.3399	1.9446	1.763	1.7012
-2791.75	7.4319	3.2408	2.3253	1.9332	1.752	1.6904
-2788.5	7.4106	3.2158	2.3063	1.9173	1.7381	1.676
-2785.25	7.398	3.1987	2.2954	1.9073	1.7288	1.6665
-2782	7.3632	3.1777	2.2764	1.8915	1.7149	1.6536
-2778.75	7.3657	3.1687	2.2693	1.8836	1.7079	1.6468
-2775.5	7.3505	3.1554	2.2566	1.8728	1.6967	1.6372
-2772.25	7.3255	3.1431	2.2462	1.8635	1.6871	1.6289
-2769	7.3067	3.1325	2.2371	1.8558	1.6791	1.6222
-2765.75	7.2925	3.1221	2.2252	1.8449	1.6702	1.614
-2762.5	7.279	3.1099	2.2149	1.8352	1.6614	1.6063
-2759.25	7.2674	3.1043	2.2087	1.8307	1.6581	1.602
-2756	7.2487	3.093	2.1981	1.8217	1.65	1.5945
-2752.75	7.2427	3.0812	2.1899	1.8137	1.6434	1.5871
-2749.5	7.1885	3.0495	2.1659	1.7932	1.6262	1.5703
-2746.25	7.1422	3.028	2.1482	1.7795	1.6139	1.5581
-2743	7.1306	3.0161	2.1381	1.7697	1.606	1.5495
-2739.75	7.0838	2.9901	2.1192	1.7546	1.5924	1.5361
-2736.5	7.0583	2.9701	2.1049	1.7424	1.5821	1.5253
-2733.25	7.0258	2.9506	2.0895	1.7304	1.5707	1.514
-2730	6.9918	2.9337	2.0774	1.7205	1.5616	1.505
-2726.75	6.9771	2.9214	2.0666	1.7126	1.553	1.4978
-2723.5	6.9707	2.908	2.0585	1.7058	1.5465	1.4922
-2720.25	6.9685	2.9023	2.052	1.7008	1.5405	1.4872
-2717	6.9643	2.8927	2.0447	1.6952	1.5353	1.483
-2713.75	6.9359	2.8715	2.0296	1.6819	1.523	1.4718
-2710.5	6.9107	2.8597	2.0222	1.6762	1.5166	1.4665
-2707.25	6.8974	2.8511	2.0149	1.6693	1.51	1.4611
-2704	6.8863	2.8368	2.0031	1.6587	1.5005	1.4525
-2700.75	6.8893	2.8346	2.0014	1.6568	1.4993	1.4516
-2697.5	6.9109	2.8396	2.0023	1.6578	1.5007	1.4527
-2694.25	6.9074	2.8364	1.9995	1.6538	1.4982	1.4503
-2691	6.8782	2.826	1.9902	1.6461	1.4914	1.4438
-2687.75	6.8972	2.8267	1.9895	1.6462	1.4925	1.4443
-2684.5	6.9021	2.8252	1.9878	1.6427	1.4922	1.4423
-2681.25	6.914	2.8189	1.9829	1.6399	1.489	1.4391
-2678	6.9036	2.8137	1.9764	1.6336	1.4842	1.4343
-2674.75	6.901	2.8101	1.9724	1.6292	1.4819	1.4317
-2671.5	6.8712	2.7922	1.9592	1.6185	1.4723	1.4227
-2668.25	6.8302	2.7702	1.9421	1.6038	1.4595	1.4095
-2665	6.8065	2.7506	1.9292	1.5923	1.4499	1.3997
-2661.75	6.7754	2.731	1.9137	1.5802	1.4379	1.388
-2658.5	6.7582	2.7149	1.9021	1.5701	1.4292	1.3793
-2655.25	6.7315	2.6959	1.886	1.5572	1.4166	1.3672
-2652	6.6969	2.6737	1.8709	1.5448	1.4046	1.356
-2648.75	6.677	2.6533	1.8562	1.5327	1.393	1.345
-2645.5	6.6701	2.6437	1.8491	1.5263	1.3858	1.3388
-2642.25	6.6539	2.6313	1.838	1.517	1.3774	1.3307
-2639	6.6441	2.6143	1.8263	1.5074	1.368	1.3222
-2635.75	6.6351	2.6018	1.8152	1.4985	1.3598	1.3148
-2632.5	6.6388	2.6002	1.8127	1.4959	1.3572	1.3127
-2629.25	6.6275	2.592	1.8051	1.4901	1.3521	1.3078
-2626	6.6198	2.5847	1.7971	1.4832	1.3465	1.3022
-2622.75	6.6077	2.5741	1.7871	1.4753	1.3391	1.2953
-2619.5	6.5789	2.5588	1.7766	1.4666	1.3316	1.2879
-2616.25	6.5477	2.5484	1.7669	1.4593	1.3246	1.2816
-2613	6.5472	2.5443	1.7618	1.4558	1.3217	1.2783
-2609.75	6.5169	2.5255	1.7479	1.4446	1.312	1.269
-2606.5	6.4938	2.5141	1.7394	1.4379	1.3054	1.2629
-2603.25	6.4795	2.5	1.7295	1.4291	1.2976	1.2556
-2600	6.466	2.4877	1.7197	1.4204	1.2902	1.2487
-2596.75	6.4472	2.4754	1.7111	1.4128	1.2836	1.2424
-2593.5	6.4642	2.4747	1.7114	1.4125	1.2831	1.2419
-2590.25	6.4585	2.4666	1.7035	1.406	1.2776	1.2365
-2587	6.4506	2.4565	1.6952	1.3997	1.2713	1.2305
-2583.75	6.4532	2.4515	1.6915	1.3957	1.2681	1.2267
-2580.5	6.4336	2.4401	1.6827	1.3888	1.2613	1.2207
-2577.25	6.406	2.4255	1.6713	1.3796	1.2526	1.2122
-2574	6.3974	2.4163	1.6635	1.3734	1.247	1.2067
-2570.75	6.3869	2.4095	1.6575	1.368	1.2422	1.2014
-2567.5	6.384	2.4048	1.6533	1.3652	1.2393	1.1987
-2564.25	6.3684	2.3968	1.6475	1.3601	1.2345	1.194
-2561	6.3502	2.3865	1.6398	1.3531	1.228	1.1882
-2557.75	6.3456	2.3777	1.6338	1.3482	1.2237	1.1839
-2554.5	6.3425	2.3718	1.6298	1.3443	1.2199	1.1803
-2551.25	6.3407	2.3674	1.6258	1.3411	1.217	1.1775
-2548	6.3571	2.3669	1.6247	1.3398	1.2154	1.1766
-2544.75	6.3592	2.3659	1.6234	1.3389	1.2142	1.176
-2541.5	6.3574	2.3621	1.6175	1.3347	1.2109	1.1727
-2538.25	6.3328	2.351	1.6085	1.327	1.2038	1.166
-2535	6.3108	2.3391	1.5982	1.3192	1.1962	1.1583
-2531.75	6.29	2.326	1.5874	1.3098	1.1879	1.1505
-2528.5	6.2592	2.3094	1.574	1.2993	1.1783	1.1416
-2525.25	6.2366	2.2972	1.5639	1.2904	1.1706	1.1346
-2522	6.2333	2.291	1.558	1.2858	1.1664	1.1301
-2518.75	6.247	2.2896	1.5564	1.2838	1.1649	1.1289
-2515.5	6.2639	2.2886	1.5539	1.2819	1.1633	1.1271
-2512.25	6.258	2.2784	1.5469	1.2757	1.1574	1.1216
-2509	6.2575	2.2791	1.5462	1.2748	1.1565	1.1208
-2505.75	6.2479	2.2687	1.5384	1.2682	1.1512	1.1157
-2502.5	6.25	2.26	1.5317	1.2623	1.1466	1.1106
-2499.25	6.249	2.2521	1.5249	1.2575	1.1427	1.1063
-2496	6.2278	2.2391	1.5154	1.2495	1.1352	1.0991
-2492.75	6.1839	2.2216	1.5017	1.2373	1.1248	1.0888
-2489.5	6.1691	2.2095	1.493	1.2298	1.1185	1.0822
-2486.25	6.1475	2.1946	1.4824	1.2206	1.11	1.0739
-2483	6.1418	2.1851	1.4757	1.2142	1.1045	1.0688
-2479.75	6.134	2.1761	1.469	1.2083	1.0988	1.0635
-2476.5	6.1104	2.1633	1.4581	1.1998	1.091	1.0563
-2473.25	6.0824	2.1489	1.4486	1.192	1.0836	1.0492
-2470	6.0666	2.1404	1.4409	1.1856	1.0778	1.0437
-2466.75	6.0489	2.1295	1.4327	1.1785	1.0711	1.0378
-2463.5	6.0459	2.124	1.4291	1.1759	1.0687	1.0355
-2460.25	6.0358	2.1166	1.4231	1.1706	1.0642	1.0312
-2457	6.0137	2.1029	1.4138	1.1641	1.0579	1.0251
-2453.75	5.9981	2.094	1.4069	1.1579	1.0526	1.02
-2450.5	5.9774	2.0806	1.3981	1.1505	1.0461	1.0138
-2447.25	5.9648	2.0725	1.392	1.1452	1.0414	1.0094
-2444	5.9544	2.0644	1.3865	1.1412	1.0374	1.0058
-2440.75	5.9476	2.0577	1.3817	1.1374	1.0332	1.0022
-2437.5	5.9484	2.0527	1.3782	1.1349	1.0307	0.9998
-2434.25	5.9618	2.0514	1.3753	1.1332	1.0289	0.998
-2431	5.9538	2.0428	1.3694	1.1282	1.0239	0.9935
-2427.75	5.9688	2.0455	1.3695	1.1287	1.0242	0.9939
-2424.5	5.9692	2.0441	1.3674	1.1269	1.0222	0.9922
-2421.25	5.991	2.0482	1.369	1.1278	1.0235	0.9932
-2418	5.9813	2.0427	1.3649	1.1244	1.0207	0.9904
-2414.75	5.987	2.0422	1.3642	1.123	1.0199	0.9894
-2411.5	5.9887	2.0411	1.3622	1.121	1.019	0.988
-2408.25	5.9925	2.0372	1.3582	1.1178	1.0169	0.9853
-2405	5.9807	2.0313	1.3533	1.1136	1.0137	0.9822
-2401.75	5.9629	2.0251	1.3481	1.1095	1.01	0.9784
-2398.5	5.9707	2.0254	1.3468	1.1093	1.0097	0.978
-2395.25	5.9651	2.0196	1.3421	1.1054	1.0061	0.9747
-2392	5.9537	2.013	1.3368	1.1009	1.002	0.9711
-2388.75	5.9556	2.0112	1.3349	1.0995	1.0005	0.9697
-2385.5	5.9548	2.0073	1.3318	1.0977	0.9983	0.9677
-2382.25	5.9879	2.0143	1.3352	1.1007	1.0009	0.9707
-2379	6.0137	2.0207	1.3392	1.1041	1.0039	0.974
-2375.75	6.0326	2.0296	1.345	1.1089	1.0079	0.9782
-2372.5	6.0576	2.0417	1.3527	1.1157	1.0139	0.9844
-2369.25	6.0978	2.0629	1.3667	1.1282	1.0258	0.9959
-2366	6.1463	2.0859	1.384	1.143	1.0398	1.0101
-2362.75	6.1817	2.1074	1.3999	1.1571	1.0532	1.0235
-2359.5	6.2337	2.1316	1.4176	1.1729	1.0685	1.0388
-2356.25	6.2684	2.1478	1.4299	1.1839	1.0794	1.0501
-2353	6.2879	2.1523	1.4344	1.1879	1.0832	1.0543
-2349.75	6.2893	2.1496	1.4327	1.1863	1.0819	1.0533
-2346.5	6.2785	2.1383	1.4238	1.1785	1.0753	1.047
-2343.25	6.2693	2.1233	1.4112	1.1674	1.0651	1.0371
-2340	6.212	2.0896	1.3862	1.145	1.0449	1.0171
-2336.75	6.1467	2.05	1.3561	1.1193	1.0211	0.9933
-2333.5	6.0777	2.0086	1.325	1.0926	0.9961	0.9686
-2330.25	6.0312	1.9758	1.3005	1.0714	0.976	0.9488
-2327	5.9494	1.9389	1.2735	1.0486	0.9551	0.928
-2323.75	5.8934	1.9146	1.256	1.0334	0.9412	0.9144
-2320.5	5.8384	1.8916	1.2394	1.0199	0.9283	0.9019
-2317.25	5.8092	1.8761	1.2282	1.0111	0.9204	0.8939
-2314	5.7838	1.8622	1.2187	1.0036	0.9135	0.8872
-2310.75	5.7671	1.852	1.2117	0.9982	0.9081	0.8821
-2307.5	5.7732	1.8498	1.2087	0.9966	0.9066	0.8805
-2304.25	5.7631	1.8437	1.2045	0.993	0.9038	0.8777
-2301	5.765	1.8406	1.2017	0.9907	0.9023	0.876
-2297.75	5.7604	1.8339	1.1965	0.9868	0.8987	0.8722
-2294.5	5.7576	1.8291	1.193	0.9834	0.8962	0.8694
-2291.25	5.7735	1.8303	1.1928	0.9834	0.8964	0.8694
-2288	5.7501	1.8197	1.1848	0.9766	0.8904	0.8636
-2284.75	5.7626	1.8158	1.1817	0.9737	0.8877	0.8612
-2281.5	5.7614	1.8104	1.1773	0.9702	0.8846	0.8582
-2278.25	5.7514	1.8041	1.1727	0.9666	0.8808	0.8548
-2275	5.7424	1.797	1.1674	0.9621	0.8765	0.8508
-2271.75	5.7152	1.7853	1.1591	0.9552	0.8701	0.8449
-2268.5	5.7023	1.7771	1.1532	0.9505	0.8653	0.8407
-2265.25	5.7141	1.7796	1.1535	0.9508	0.8656	0.8414
-2262	5.7151	1.7783	1.1523	0.9499	0.8649	0.8407
-2258.75	5.7265	1.7762	1.15	0.9483	0.8633	0.8391
-2255.5	5.7148	1.7725	1.1464	0.9457	0.861	0.8366
-2252.25	5.7282	1.7758	1.1481	0.9475	0.8629	0.838
-2249	5.7229	1.7728	1.1452	0.9449	0.8609	0.8359
-2245.75	5.717	1.7693	1.1426	0.9432	0.8593	0.8341
-2242.5	5.7194	1.7706	1.1429	0.944	0.8601	0.8343
-2239.25	5.7101	1.7682	1.1411	0.9429	0.8588	0.833
-2236	5.7089	1.7645	1.1389	0.9413	0.8572	0.8316
-2232.75	5.6914	1.7565	1.1333	0.9366	0.8529	0.8276
-2229.5	5.6823	1.7501	1.129	0.933	0.8497	0.8245
-2226.25	5.6788	1.7466	1.1269	0.9311	0.848	0.823
-2223	5.6726	1.7393	1.122	0.927	0.8446	0.82
-2219.75	5.6882	1.7398	1.1213	0.9266	0.8445	0.8201
-2216.5	5.6791	1.732	1.1162	0.9221	0.841	0.817
-2213.25	5.6616	1.7228	1.1096	0.9166	0.8361	0.8129
-2210	5.683	1.7246	1.1103	0.917	0.8368	0.8135
-2206.75	5.6792	1.7221	1.1077	0.9151	0.8354	0.8123
-2203.5	5.6766	1.7192	1.1063	0.9139	0.8347	0.8112
-2200.25	5.6863	1.7205	1.1077	0.9148	0.8355	0.8119
-2197	5.6927	1.7206	1.1084	0.9152	0.8363	0.8124
-2193.75	5.683	1.7154	1.1049	0.9125	0.8339	0.8099
-2190.5	5.6897	1.7129	1.1034	0.911	0.8327	0.8084
-2187.25	5.6839	1.7076	1.1006	0.9086	0.8303	0.8059
-2184	5.6771	1.7029	1.0972	0.9059	0.8278	0.8034
-2180.75	5.6647	1.6931	1.0909	0.9008	0.8232	0.7989
-2177.5	5.6462	1.6844	1.0851	0.8957	0.8185	0.7943
-2174.25	5.6057	1.6707	1.0756	0.8881	0.8113	0.7875
-2171	5.5681	1.6563	1.0651	0.88	0.8035	0.7802
-2167.75	5.5543	1.6489	1.0588	0.8757	0.799	0.7759
-2164.5	5.553	1.6444	1.0549	0.8729	0.7965	0.7736
-2161.25	5.5496	1.6427	1.0531	0.8719	0.7953	0.7726
-2158	5.5474	1.6397	1.0504	0.8701	0.7938	0.771
-2154.75	5.5559	1.64	1.0502	0.8702	0.7939	0.771
-2151.5	5.5535	1.6401	1.05	0.8703	0.7939	0.7709
-2148.25	5.5773	1.6506	1.0568	0.8761	0.7993	0.7761
-2145	5.6152	1.6709	1.0704	0.8875	0.8101	0.786
-2141.75	5.6492	1.6932	1.0855	0.8997	0.8214	0.7962
-2138.5	5.6853	1.7293	1.1121	0.922	0.8418	0.816
-2135.25	5.7439	1.7867	1.1584	0.9629	0.8801	0.8536
-2132	5.8152	1.8539	1.2131	1.0124	0.927	0.8991
-2128.75	5.8801	1.9082	1.2569	1.0514	0.9633	0.9345
-2125.5	5.933	1.9545	1.2967	1.0885	0.999	0.9711
-2122.25	5.9926	2.0111	1.3461	1.1355	1.0449	1.0192
-2119	6.0652	2.0644	1.3907	1.1773	1.0852	1.0597
-2115.75	6.0912	2.0738	1.3978	1.1846	1.0914	1.0665
-2112.5	6.0736	2.0595	1.3856	1.1756	1.0826	1.0598
-2109.25	6.0476	2.0412	1.3718	1.1655	1.0736	1.0521
-2106	6.0426	2.0132	1.3447	1.1409	1.0496	1.0266
-2102.75	5.9789	1.9452	1.2847	1.0848	0.9947	0.9702
-2099.5	5.8936	1.8747	1.2271	1.0322	0.9448	0.9214
-2096.25	5.8445	1.8343	1.1938	1.0022	0.9166	0.8931
-2093	5.7817	1.7878	1.1579	0.9699	0.8855	0.8608
-2089.75	5.745	1.7516	1.1292	0.9445	0.8617	0.8363
-2086.5	5.75	1.7471	1.1262	0.9416	0.8594	0.8341
-2083.25	5.7806	1.7659	1.1409	0.9542	0.8717	0.8464
-2080	5.8218	1.7889	1.1587	0.9699	0.8865	0.8611
-2076.75	5.8523	1.8085	1.1736	0.9832	0.8994	0.8738
-2073.5	5.8854	1.826	1.1866	0.995	0.9107	0.8853
-2070.25	5.9015	1.8371	1.1949	1.0027	0.9181	0.8928
-2067	5.9233	1.8431	1.1997	1.007	0.9226	0.8971
-2063.75	5.9382	1.8439	1.1991	1.0074	0.9226	0.8974
-2060.5	5.9415	1.8377	1.1935	1.0028	0.9185	0.8934
-2057.25	5.9315	1.821	1.1802	0.9918	0.9079	0.8834
-2054	5.8978	1.7956	1.1604	0.9748	0.8921	0.8672
-2050.75	5.8593	1.766	1.138	0.9556	0.8739	0.8494
-2047.5	5.8057	1.7331	1.1144	0.9353	0.8552	0.8306
-2044.25	5.7335	1.6925	1.0856	0.9105	0.8321	0.8081
-2041	5.6716	1.6559	1.0601	0.8886	0.812	0.7882
-2037.75	5.5807	1.6162	1.0331	0.8658	0.7908	0.7672
-2034.5	5.5049	1.5833	1.0107	0.8469	0.7736	0.7502
-2031.25	5.4542	1.5613	0.9959	0.8347	0.7622	0.7389
-2028	5.4257	1.5539	0.9918	0.8317	0.7589	0.7356
-2024.75	5.4535	1.5737	1.007	0.8458	0.7716	0.7477
-2021.5	5.5081	1.6124	1.0389	0.8742	0.7978	0.7732
-2018.25	5.5718	1.6608	1.078	0.9098	0.8309	0.8057
-2015	5.6186	1.709	1.1206	0.9495	0.8685	0.8432
-2011.75	5.6596	1.7613	1.1676	0.9947	0.9121	0.8871
-2008.5	5.6932	1.8065	1.2096	1.0357	0.9521	0.9283
-2005.25	5.733	1.8412	1.2414	1.0665	0.9824	0.9594
-2002	5.7349	1.8545	1.2563	1.0828	1.0005	0.9797
-1998.75	5.7562	1.869	1.2699	1.0971	1.0168	0.9975
-1995.5	5.746	1.8587	1.2612	1.0902	1.0118	0.9935
-1992.25	5.7222	1.8291	1.232	1.0629	0.9854	0.9663
-1989	5.6638	1.7736	1.1828	1.0162	0.9408	0.9213
-1985.75	5.5986	1.711	1.1293	0.9661	0.8922	0.872
-1982.5	5.5125	1.6356	1.0667	0.908	0.8359	0.8145
-1979.25	5.415	1.561	1.007	0.8527	0.782	0.7597
-1976	5.3202	1.4999	0.9604	0.8109	0.7418	0.7193
-1972.75	5.2117	1.4504	0.9252	0.78	0.713	0.6905
-1969.5	5.1342	1.42	0.9043	0.762	0.6959	0.6735
-1966.25	5.0962	1.4076	0.8958	0.7553	0.6892	0.6668
-1963	5.0953	1.4068	0.895	0.755	0.6887	0.6659
-1959.75	5.1083	1.4113	0.8987	0.7583	0.6918	0.6686
-1956.5	5.1244	1.4164	0.9024	0.7618	0.6951	0.6718
-1953.25	5.1516	1.4266	0.909	0.7682	0.701	0.6776
-1950	5.162	1.4312	0.9126	0.7719	0.7046	0.6813
-1946.75	5.1637	1.434	0.9151	0.7746	0.7075	0.6842
-1943.5	5.176	1.437	0.9173	0.7771	0.7102	0.6871
-1940.25	5.1782	1.4365	0.9169	0.7775	0.7108	0.6877
-1937	5.1964	1.4378	0.9181	0.7784	0.7123	0.6888
-1933.75	5.206	1.4385	0.9185	0.7787	0.7127	0.6894
-1930.5	5.1998	1.4323	0.9145	0.776	0.7102	0.6867
-1927.25	5.1778	1.4234	0.9084	0.7711	0.7054	0.6822
-1924	5.144	1.4118	0.9011	0.765	0.6995	0.6762
-1920.75	5.1102	1.402	0.8949	0.7596	0.6944	0.6713
-1917.5	5.0925	1.3962	0.8918	0.7567	0.692	0.669
-1914.25	5.0845	1.3931	0.89	0.7553	0.6905	0.6678
-1911	5.0773	1.3898	0.8883	0.7539	0.6892	0.6664
-1907.75	5.0609	1.3869	0.8866	0.7524	0.6878	0.6649
-1904.5	5.0643	1.3862	0.8864	0.7524	0.6877	0.665
-1901.25	5.065	1.3855	0.8863	0.7524	0.6879	0.665
-1898	5.0723	1.3868	0.8874	0.7536	0.6891	0.6663
-1894.75	5.09	1.3918	0.8903	0.7564	0.6919	0.6689
-1891.5	5.0948	1.3915	0.8901	0.7568	0.6925	0.6697
-1888.25	5.084	1.3899	0.8889	0.7566	0.6923	0.6695
-1885	5.0811	1.3895	0.8889	0.757	0.6929	0.6701
-1881.75	5.0853	1.3909	0.8898	0.7587	0.6943	0.6715
-1878.5	5.0773	1.3881	0.8886	0.7581	0.6936	0.671
-1875.25	5.0625	1.3846	0.8866	0.7569	0.6926	0.67
-1872	5.0667	1.3839	0.8867	0.7576	0.6932	0.6703
-1868.75	5.0567	1.3813	0.8856	0.757	0.6927	0.6697
-1865.5	5.0475	1.3766	0.883	0.7554	0.691	0.668
-1862.25	5.0437	1.3739	0.882	0.7546	0.6904	0.6674
-1859	5.0341	1.3688	0.8793	0.7528	0.6886	0.6657
-1855.75	5.0269	1.3659	0.8779	0.7519	0.6879	0.6651
-1852.5	5.0275	1.366	0.8782	0.7525	0.6886	0.6658
-1849.25	5.0337	1.3683	0.8802	0.7545	0.6908	0.6679
-1846	5.0277	1.3664	0.8794	0.7543	0.6908	0.6677
-1842.75	5.0317	1.3683	0.8812	0.7559	0.6924	0.6696
-1839.5	5.0406	1.3721	0.884	0.7584	0.6951	0.6724
-1836.25	5.0551	1.3766	0.8875	0.7618	0.6984	0.6756
-1833	5.0827	1.3847	0.8933	0.767	0.7032	0.6805
-1829.75	5.0889	1.3868	0.8956	0.769	0.7056	0.6825
-1826.5	5.0996	1.3902	0.8983	0.7712	0.7081	0.6849
-1823.25	5.0992	1.3894	0.8984	0.7713	0.7083	0.6853
-1820	5.1056	1.3911	0.8993	0.7727	0.7097	0.6868
-1816.75	5.1118	1.3921	0.9002	0.7736	0.7106	0.6878
-1813.5	5.1172	1.393	0.9011	0.7748	0.7118	0.689
-1810.25	5.1044	1.389	0.8987	0.7733	0.7106	0.6878
-1807	5.0877	1.3849	0.8962	0.7718	0.7094	0.6862
-1803.75	5.0763	1.3834	0.8951	0.7718	0.7091	0.6862
-1800.5	5.0704	1.3826	0.8951	0.7723	0.7095	0.6865
-1797.25	5.0777	1.3861	0.8974	0.7747	0.7117	0.6886
-1794	5.0635	1.3833	0.896	0.774	0.711	0.6881
-1790.75	5.039	1.3771	0.8928	0.7718	0.7092	0.6861
-1787.5	5.036	1.3786	0.8943	0.7732	0.7104	0.6877
-1784.25	5.0358	1.3793	0.8959	0.7749	0.712	0.6891
-1781	5.0447	1.3832	0.8991	0.7779	0.7149	0.692
-1777.75	5.0452	1.3836	0.9001	0.7786	0.7157	0.6929
-1774.5	5.0378	1.3817	0.8996	0.7785	0.7157	0.6927
-1771.25	5.0244	1.3786	0.8988	0.7779	0.7154	0.6925
-1768	5.0035	1.3742	0.8969	0.7765	0.7141	0.6912
-1764.75	4.9968	1.3722	0.8965	0.7768	0.7145	0.6914
-1761.5	4.993	1.3713	0.8964	0.7772	0.715	0.6918
-1758.25	4.9904	1.3719	0.8973	0.7783	0.716	0.6928
-1755	4.9886	1.372	0.898	0.7792	0.7171	0.694
-1751.75	5.0072	1.3786	0.9033	0.7841	0.7216	0.6986
-1748.5	5.0136	1.3822	0.9066	0.7872	0.7247	0.7016
-1745.25	5.0365	1.389	0.9119	0.792	0.7293	0.7065
-1742	5.0584	1.3956	0.9171	0.7968	0.7338	0.7111
-1738.75	5.0746	1.4015	0.9216	0.8009	0.7378	0.7152
-1735.5	5.0849	1.4052	0.9246	0.8041	0.7409	0.718
-1732.25	5.1024	1.4109	0.9292	0.8085	0.7453	0.722
-1729	5.1123	1.4141	0.9324	0.8113	0.7483	0.7247
-1725.75	5.1153	1.4159	0.9344	0.8135	0.7508	0.7266
-1722.5	5.1232	1.4186	0.9371	0.8163	0.7535	0.7287
-1719.25	5.1062	1.4154	0.936	0.8156	0.7533	0.728
-1716	5.0924	1.411	0.934	0.8143	0.752	0.7267
-1712.75	5.0655	1.4031	0.9295	0.8112	0.7489	0.7236
-1709.5	5.0429	1.3955	0.925	0.808	0.7458	0.7205
-1706.25	5.0404	1.3954	0.9255	0.809	0.7467	0.7213
-1703	5.0352	1.3944	0.9256	0.8094	0.7469	0.722
-1699.75	5.0232	1.391	0.9241	0.8086	0.7459	0.7216
-1696.5	5.0031	1.3861	0.9216	0.8072	0.7445	0.7204
-1693.25	4.996	1.3855	0.9217	0.8076	0.745	0.7211
-1690	4.9858	1.3837	0.9207	0.8071	0.745	0.7212
-1686.75	4.9902	1.3858	0.9229	0.8095	0.7471	0.7233
-1683.5	4.9851	1.3859	0.9241	0.8106	0.7486	0.7244
-1680.25	4.9939	1.39	0.9275	0.814	0.7523	0.7276
-1677	4.9912	1.3919	0.93	0.8167	0.7547	0.73
-1673.75	4.9911	1.393	0.9318	0.8188	0.7567	0.7321
-1670.5	4.9989	1.396	0.9351	0.8221	0.7599	0.735
-1667.25	5.0114	1.4013	0.9393	0.8265	0.7641	0.7391
-1664	5.008	1.4035	0.9414	0.8289	0.7662	0.7418
-1660.75	4.9949	1.402	0.941	0.8292	0.7666	0.7424
-1657.5	4.9983	1.4032	0.9427	0.8312	0.7686	0.7445
-1654.25	5.0096	1.4059	0.9455	0.834	0.7713	0.7474
-1651	5.003	1.4056	0.9466	0.8354	0.7729	0.7489
-1647.75	4.9904	1.405	0.9472	0.8362	0.774	0.7499
-1644.5	5.0106	1.412	0.9528	0.8418	0.7792	0.7548
-1641.25	5.0249	1.4174	0.9577	0.8467	0.7838	0.7588
-1638	5.0434	1.4238	0.9629	0.8519	0.7887	0.7634
-1634.75	5.0605	1.4308	0.9684	0.8577	0.7942	0.7683
-1631.5	5.0608	1.4333	0.9708	0.8601	0.7968	0.7709
-1628.25	5.0625	1.4367	0.9742	0.8638	0.8005	0.7745
-1625	5.069	1.4401	0.9774	0.8671	0.8036	0.7778
-1621.75	5.0756	1.4434	0.9804	0.8705	0.8066	0.7808
-1618.5	5.0784	1.4461	0.9828	0.8731	0.8088	0.7834
-1615.25	5.0831	1.4489	0.9856	0.8762	0.8117	0.7863
-1612	5.0786	1.4499	0.9879	0.8785	0.8139	0.7884
-1608.75	5.0777	1.4506	0.9897	0.8807	0.816	0.7905
-1605.5	5.0713	1.4518	0.9917	0.8827	0.8179	0.7925
-1602.25	5.0675	1.4539	0.9942	0.8856	0.8203	0.795
-1599	5.0592	1.4527	0.9948	0.8863	0.8212	0.7957
-1595.75	5.0637	1.4545	0.9976	0.8891	0.824	0.7983
-1592.5	5.0679	1.4577	1.0009	0.8923	0.8271	0.8013
-1589.25	5.0645	1.4593	1.0028	0.8942	0.8291	0.8032
-1586	5.0588	1.4589	1.0037	0.8953	0.8304	0.8046
-1582.75	5.0489	1.4577	1.0036	0.8952	0.8309	0.8051
-1579.5	5.0509	1.4598	1.006	0.8981	0.8336	0.8077
-1576.25	5.0581	1.4642	1.0096	0.9017	0.8374	0.8113
-1573	5.0566	1.4659	1.0118	0.9043	0.8399	0.8136
-1569.75	5.0575	1.4682	1.0144	0.9075	0.8429	0.8163
-1566.5	5.0585	1.47	1.0163	0.9107	0.8457	0.8191
-1563.25	5.0754	1.4764	1.0219	0.9161	0.8511	0.8242
-1560	5.0763	1.4782	1.0244	0.9192	0.8539	0.8269
-1556.75	5.0773	1.4799	1.0266	0.9222	0.8566	0.8293
-1553.5	5.0732	1.4812	1.0285	0.9245	0.8588	0.8315
-1550.25	5.0774	1.4844	1.0323	0.9283	0.8625	0.8349
-1547	5.078	1.4861	1.0349	0.931	0.8647	0.8375
-1543.75	5.0902	1.4913	1.0399	0.9354	0.8691	0.842
-1540.5	5.0915	1.4941	1.0433	0.9387	0.8722	0.8452
-1537.25	5.0953	1.4989	1.0478	0.9423	0.8762	0.8494
-1534	5.1072	1.5064	1.0542	0.948	0.8815	0.8552
-1530.75	5.1084	1.5089	1.0577	0.9509	0.8844	0.8581
-1527.5	5.0996	1.5102	1.06	0.9531	0.8869	0.8607
-1524.25	5.0974	1.5109	1.062	0.955	0.8891	0.863
-1521	5.1107	1.5179	1.0679	0.9606	0.8945	0.8682
-1517.75	5.1222	1.5238	1.0732	0.9657	0.8998	0.8731
-1514.5	5.134	1.5289	1.0777	0.9702	0.9042	0.8774
-1511.25	5.1243	1.5292	1.0792	0.9719	0.9063	0.8793
-1508	5.1295	1.5316	1.0825	0.975	0.9094	0.8825
-1504.75	5.1278	1.5335	1.0858	0.9778	0.9125	0.8854
-1501.5	5.1188	1.5329	1.0863	0.9794	0.9138	0.8865
-1498.25	5.1138	1.5351	1.0891	0.9827	0.9167	0.8894
-1495	5.1132	1.5393	1.0932	0.9864	0.9201	0.893
-1491.75	5.104	1.5388	1.094	0.988	0.9215	0.8944
-1488.5	5.0853	1.5374	1.0945	0.9891	0.9228	0.8954
-1485.25	5.0964	1.5444	1.1008	0.9954	0.9287	0.9013
-1482	5.1016	1.5471	1.1047	1.0001	0.9326	0.9048
-1478.75	5.0973	1.5475	1.1064	1.0025	0.9348	0.9068
-1475.5	5.1022	1.552	1.1112	1.0079	0.9397	0.9112
-1472.25	5.1061	1.5549	1.1149	1.0117	0.9435	0.9149
-1469	5.123	1.5628	1.1227	1.019	0.9504	0.9215
-1465.75	5.1463	1.5719	1.1315	1.0271	0.9582	0.9289
-1462.5	5.1605	1.5792	1.1379	1.033	0.9641	0.9349
-1459.25	5.1763	1.5884	1.1457	1.0407	0.9713	0.9418
-1456	5.185	1.5935	1.1503	1.0456	0.9758	0.9465
-1452.75	5.1761	1.5927	1.151	1.0466	0.9768	0.9476
-1449.5	5.1724	1.5955	1.1536	1.0491	0.9793	0.9502
-1446.25	5.181	1.6027	1.1599	1.0557	0.9854	0.9564
-1443	5.1703	1.6029	1.1617	1.0575	0.9874	0.9584
-1439.75	5.1595	1.6033	1.1632	1.0599	0.9892	0.9604
-1436.5	5.1453	1.6025	1.1641	1.0614	0.9908	0.9618
-1433.25	5.1378	1.6033	1.1661	1.064	0.9932	0.9639
-1430	5.158	1.6135	1.1751	1.0729	1.0014	0.9719
-1426.75	5.154	1.6134	1.177	1.0752	1.0036	0.9741
-1423.5	5.1777	1.6237	1.1867	1.0844	1.0124	0.9824
-1420.25	5.1923	1.6317	1.194	1.0915	1.0193	0.9892
-1417	5.2034	1.6396	1.202	1.0992	1.0267	0.9967
-1413.75	5.2257	1.6504	1.2117	1.1083	1.0354	1.0052
-1410.5	5.2662	1.6679	1.226	1.1221	1.0487	1.0183
-1407.25	5.2985	1.6834	1.2379	1.1338	1.06	1.0295
-1404	5.3111	1.6938	1.2475	1.1434	1.0688	1.0387
-1400.75	5.3192	1.7006	1.2532	1.1494	1.0747	1.0446
-1397.5	5.3317	1.7074	1.2599	1.1555	1.0809	1.0509
-1394.25	5.3514	1.717	1.2683	1.164	1.0889	1.0586
-1391	5.3712	1.7319	1.2818	1.1768	1.101	1.0701
-1387.75	5.3931	1.7533	1.2998	1.1942	1.1183	1.0867
-1384.5	5.4379	1.7869	1.3274	1.2213	1.1441	1.1122
-1381.25	5.4637	1.8134	1.3502	1.2435	1.165	1.1336
-1378	5.4894	1.8352	1.37	1.2622	1.1835	1.1519
-1374.75	5.5125	1.8534	1.3863	1.2777	1.1989	1.1667
-1371.5	5.5307	1.8667	1.3978	1.289	1.2102	1.1783
-1368.25	5.5376	1.8732	1.4033	1.2947	1.2158	1.1841
-1365	5.5484	1.876	1.4065	1.2981	1.2193	1.1876
-1361.75	5.5559	1.875	1.406	1.2973	1.2192	1.1876
-1358.5	5.5353	1.8582	1.3943	1.2854	1.2075	1.1755
-1355.25	5.4711	1.8219	1.3659	1.2589	1.1814	1.1492
-1352	5.4179	1.7915	1.3443	1.2383	1.1614	1.1285
-1348.75	5.3743	1.7749	1.3328	1.2274	1.1506	1.1179
-1345.5	5.3557	1.7703	1.331	1.2268	1.1496	1.1171
-1342.25	5.3586	1.7752	1.3361	1.2322	1.1553	1.1224
-1339	5.3419	1.7741	1.3372	1.234	1.1564	1.1241
-1335.75	5.3253	1.7722	1.3374	1.2347	1.1573	1.1252
-1332.5	5.3088	1.7703	1.3372	1.2354	1.1582	1.1264
-1329.25	5.3012	1.7718	1.3405	1.2387	1.1618	1.1302
-1326	5.2906	1.7728	1.3434	1.2424	1.1648	1.1338
-1322.75	5.2736	1.7729	1.3448	1.244	1.1667	1.1358
-1319.5	5.2858	1.7794	1.3517	1.2515	1.1739	1.1424
-1316.25	5.3027	1.7877	1.3601	1.2595	1.1817	1.1497
-1313	5.3225	1.7983	1.3694	1.2687	1.1903	1.1574
-1309.75	5.3272	1.804	1.3755	1.2743	1.1961	1.1631
-1306.5	5.3289	1.8087	1.3805	1.2792	1.2013	1.1675
-1303.25	5.3325	1.8135	1.3861	1.2847	1.2064	1.1724
-1300	5.3401	1.8208	1.3944	1.2928	1.214	1.1795
-1296.75	5.3481	1.8294	1.4026	1.3006	1.2212	1.187
-1293.5	5.3624	1.8397	1.4122	1.3102	1.2302	1.1956
-1290.25	5.3749	1.8481	1.42	1.3176	1.2373	1.2025
-1287	5.3741	1.8518	1.4248	1.3218	1.2415	1.2071
-1283.75	5.373	1.8562	1.4294	1.3269	1.2467	1.212
-1280.5	5.3785	1.8638	1.4353	1.3335	1.2535	1.2192
-1277.25	5.3803	1.8684	1.44	1.3388	1.2583	1.224
-1274	5.3879	1.875	1.4469	1.346	1.2649	1.2309
-1270.75	5.4	1.8848	1.4561	1.3553	1.2743	1.2401
-1267.5	5.3861	1.8886	1.4593	1.3598	1.278	1.244
-1264.25	5.3894	1.8947	1.4655	1.3665	1.2842	1.2509
-1261	5.3868	1.8986	1.4704	1.3718	1.2891	1.2555
-1257.75	5.3968	1.9074	1.479	1.3803	1.2971	1.2635
-1254.5	5.3861	1.9096	1.4832	1.3843	1.3013	1.2675
-1251.25	5.398	1.9173	1.4904	1.3912	1.308	1.274
-1248	5.3912	1.9198	1.4949	1.3954	1.3126	1.2776
-1244.75	5.4103	1.9321	1.5061	1.4057	1.3223	1.2873
-1241.5	5.4156	1.9375	1.5129	1.4126	1.3284	1.293
-1238.25	5.419	1.9466	1.5199	1.4202	1.3356	1.2993
-1235	5.4227	1.9543	1.5277	1.4274	1.3431	1.3058
-1231.75	5.4301	1.9613	1.5366	1.435	1.351	1.3131
-1228.5	5.4396	1.9691	1.5438	1.4422	1.3573	1.3196
-1225.25	5.4524	1.9773	1.5523	1.4509	1.3654	1.3274
-1222	5.4697	1.9885	1.5625	1.4616	1.3751	1.3369
-1218.75	5.476	1.9953	1.5703	1.4696	1.3824	1.3441
-1215.5	5.4975	2.0119	1.584	1.4833	1.3951	1.3567
-1212.25	5.5203	2.0258	1.5971	1.4958	1.4077	1.3692
-1209	5.5223	2.0319	1.6035	1.5018	1.4142	1.3756
-1205.75	5.5406	2.0445	1.6146	1.5126	1.4257	1.3869
-1202.5	5.5358	2.0457	1.6181	1.5153	1.4289	1.3911
-1199.25	5.5412	2.0528	1.6255	1.5229	1.4361	1.3989
-1196	5.5391	2.0591	1.6317	1.5292	1.4417	1.4061
-1192.75	5.5511	2.0718	1.6438	1.5396	1.4517	1.4168
-1189.5	5.5633	2.0781	1.6515	1.5469	1.4584	1.4246
-1186.25	5.5782	2.0899	1.6626	1.5577	1.4689	1.4347
-1183	5.6024	2.1032	1.675	1.5699	1.4805	1.4453
-1179.75	5.6153	2.1116	1.6834	1.5781	1.4883	1.4517
-1176.5	5.6235	2.121	1.6935	1.5874	1.4966	1.4594
-1173.25	5.6316	2.1274	1.7014	1.5957	1.5047	1.466
-1170	5.6471	2.1395	1.7131	1.6065	1.5155	1.4752
-1166.75	5.6402	2.1426	1.7177	1.612	1.5206	1.4796
-1163.5	5.6358	2.148	1.7238	1.6188	1.5267	1.4847
-1160.25	5.6399	2.1552	1.7321	1.6269	1.5337	1.4918
-1157	5.6599	2.1676	1.7433	1.6399	1.545	1.5029
-1153.75	5.652	2.169	1.7484	1.6439	1.5496	1.5079
-1150.5	5.649	2.1756	1.7554	1.6502	1.556	1.5144
-1147.25	5.6492	2.184	1.764	1.6587	1.5645	1.523
-1144	5.6602	2.1982	1.7763	1.6708	1.5763	1.5347
-1140.75	5.6857	2.2122	1.7899	1.6842	1.5894	1.5476
-1137.5	5.7036	2.2236	1.8017	1.695	1.6008	1.5585
-1134.25	5.7259	2.2422	1.8175	1.7103	1.6154	1.573
-1131	5.7215	2.2497	1.8244	1.7177	1.6225	1.5798
-1127.75	5.7454	2.2646	1.8379	1.7314	1.636	1.5937
-1124.5	5.7794	2.2843	1.8546	1.7471	1.6514	1.6096
-1121.25	5.7851	2.2927	1.8629	1.756	1.6591	1.6174
-1118	5.8059	2.3055	1.8762	1.7685	1.6715	1.6294
-1114.75	5.8195	2.3187	1.8883	1.7811	1.6823	1.6414
-1111.5	5.8295	2.3293	1.897	1.79	1.691	1.6502
-1108.25	5.8367	2.3367	1.905	1.7982	1.699	1.658
-1105	5.8371	2.3415	1.9107	1.8032	1.7051	1.6634
-1101.75	5.8487	2.3485	1.9194	1.8114	1.7132	1.6708
-1098.5	5.8583	2.3598	1.9309	1.8226	1.7238	1.6812
-1095.25	5.8703	2.3674	1.9387	1.8306	1.7322	1.6892
-1092	5.853	2.3681	1.9407	1.833	1.7352	1.6915
-1088.75	5.8604	2.3764	1.9489	1.8414	1.7441	1.6993
-1085.5	5.8833	2.3935	1.9662	1.8577	1.7606	1.7153
-1082.25	5.8794	2.4028	1.974	1.8658	1.7687	1.7218
-1079	5.8685	2.4074	1.9814	1.8721	1.7752	1.7283
-1075.75	5.861	2.414	1.9879	1.8791	1.782	1.7348
-1072.5	5.8725	2.4307	2.0013	1.8933	1.7955	1.7473
-1069.25	5.8768	2.4395	2.0105	1.9035	1.8046	1.7562
-1066	5.8711	2.443	2.0153	1.9094	1.8099	1.7615
-1062.75	5.8918	2.4579	2.0285	1.9227	1.8226	1.7744
-1059.5	5.9183	2.4749	2.0449	1.9382	1.8369	1.79
-1056.25	5.9461	2.4934	2.0622	1.9553	1.8526	1.8059
-1053	5.9947	2.5183	2.0873	1.9778	1.8725	1.8275
-1049.75	6.0233	2.5418	2.1103	1.9995	1.8923	1.8473
-1046.5	6.0627	2.5651	2.1324	2.0218	1.9122	1.8666
-1043.25	6.1223	2.5999	2.1667	2.0536	1.9421	1.8959
-1040	6.177	2.644	2.2064	2.0919	1.9782	1.9313
-1036.75	6.234	2.6835	2.2416	2.1261	2.0113	1.9627
-1033.5	6.2556	2.7077	2.2657	2.1474	2.0333	1.9853
-1030.25	6.2603	2.7225	2.2803	2.1631	2.0491	2.0016
-1027	6.2975	2.7537	2.3089	2.1904	2.0766	2.0289
-1023.75	6.303	2.7663	2.323	2.2052	2.0913	2.0438
-1020.5	6.3061	2.7785	2.3328	2.2144	2.1028	2.0548
-1017.25	6.3166	2.7826	2.3376	2.2204	2.109	2.0619
-1014	6.2932	2.7752	2.333	2.2168	2.1039	2.0589
-1010.75	6.2818	2.7749	2.3337	2.2187	2.104	2.0601
-1007.5	6.2773	2.7757	2.3363	2.2212	2.105	2.0599
-1004.25	6.2933	2.7864	2.3471	2.2307	2.1128	2.0683
-1001	6.3005	2.7991	2.359	2.2443	2.1236	2.0792
-997.75	6.3235	2.8246	2.3813	2.269	2.1457	2.1015
-994.5	6.399	2.8656	2.4178	2.3035	2.1803	2.1354
-991.25	6.4492	2.9046	2.4531	2.3356	2.212	2.1658
-988	6.4796	2.9341	2.4803	2.3626	2.2365	2.1923
-984.75	6.533	2.9742	2.5164	2.3958	2.2723	2.2281
-981.5	6.5597	3.0015	2.5431	2.42	2.2972	2.2513
-978.25	6.5869	3.0262	2.5663	2.4405	2.3187	2.274
-975	6.6044	3.0487	2.587	2.4634	2.343	2.2988
-971.75	6.6328	3.0753	2.6138	2.4907	2.3721	2.3286
-968.5	6.6744	3.1005	2.6408	2.5165	2.3976	2.354
-965.25	6.6673	3.1067	2.6445	2.5226	2.4023	2.3586
-962	6.682	3.1121	2.6542	2.533	2.4134	2.3689
-958.75	6.6716	3.1064	2.6496	2.5309	2.4109	2.3657
-955.5	6.6285	3.0872	2.6324	2.5164	2.394	2.3496
-952.25	6.5709	3.053	2.6061	2.4927	2.3689	2.3261
-949	6.5548	3.0368	2.5925	2.4795	2.3573	2.3143
-945.75	6.5082	3.0088	2.5681	2.4564	2.3351	2.2901
-942.5	6.4555	2.9858	2.547	2.4346	2.3118	2.2661
-939.25	6.4414	2.9688	2.5328	2.4194	2.2972	2.2504
-936	6.3918	2.946	2.5151	2.402	2.2792	2.2342
-932.75	6.3677	2.9405	2.5129	2.3982	2.2785	2.232
-929.5	6.3674	2.9468	2.5207	2.4056	2.2856	2.2397
-926.25	6.3654	2.9568	2.5315	2.4172	2.2972	2.2509
-923	6.3709	2.9681	2.5429	2.4309	2.3104	2.263
-919.75	6.3974	2.9952	2.5689	2.4545	2.3347	2.2862
-916.5	6.4095	3.0135	2.5861	2.474	2.3519	2.3031
-913.25	6.4114	3.0216	2.5966	2.4833	2.3618	2.315
-910	6.4121	3.0334	2.6096	2.4966	2.3739	2.3231
-906.75	6.4142	3.0442	2.6179	2.5036	2.383	2.3343
-903.5	6.4328	3.0618	2.6345	2.5206	2.3984	2.3486
-900.25	6.4584	3.0821	2.6524	2.5408	2.417	2.3663
-897	6.4781	3.0956	2.6674	2.5519	2.4294	2.3775
-893.75	6.4815	3.1026	2.6735	2.5604	2.4366	2.3861
-890.5	6.5014	3.1105	2.6815	2.5713	2.4448	2.3953
-887.25	6.5203	3.1269	2.6981	2.5855	2.46	2.4069
-884	6.5596	3.1524	2.721	2.6083	2.4814	2.4283
-880.75	6.5899	3.176	2.7459	2.6317	2.5045	2.4498
-877.5	6.6319	3.2028	2.7692	2.6567	2.5276	2.4734
-874.25	6.6385	3.2166	2.7834	2.6709	2.5403	2.4862
-871	6.6533	3.238	2.803	2.6882	2.5573	2.5028
-867.75	6.656	3.2523	2.8177	2.7028	2.5729	2.5171
-864.5	6.671	3.2697	2.8348	2.7202	2.5873	2.534
-861.25	6.6994	3.2884	2.8534	2.7374	2.6018	2.548
-858	6.6909	3.2937	2.8608	2.745	2.6111	2.556
-854.75	6.718	3.3139	2.8795	2.7647	2.6287	2.5739
-851.5	6.737	3.3262	2.8943	2.7791	2.6422	2.5875
-848.25	6.7413	3.3317	2.9025	2.7874	2.6505	2.5957
-845	6.7517	3.3456	2.913	2.7982	2.6605	2.6067
-841.75	6.7747	3.3637	2.9301	2.813	2.6791	2.6258
-838.5	6.8038	3.3957	2.9584	2.8426	2.7052	2.6492
-835.25	6.8182	3.4086	2.9742	2.8567	2.7198	2.6644
-832	6.8412	3.4309	2.9947	2.8749	2.7408	2.6857
-828.75	6.8522	3.4506	3.0122	2.8944	2.7575	2.7019
-825.5	6.8496	3.4643	3.0261	2.9053	2.772	2.7167
-822.25	6.8774	3.4887	3.0502	2.9296	2.7904	2.7359
-819	6.8922	3.5077	3.069	2.9482	2.8097	2.7539
-815.75	6.89	3.5222	3.084	2.9635	2.8207	2.7684
-812.5	6.8974	3.538	3.1008	2.9779	2.8371	2.7836
-809.25	6.923	3.5569	3.1218	3.0016	2.8546	2.8023
-806	6.9451	3.5736	3.1375	3.0184	2.8715	2.8215
-802.75	6.9801	3.6054	3.1642	3.0438	2.8954	2.8455
-799.5	7.0096	3.6163	3.1799	3.0564	2.9064	2.8579
-796.25	7.0675	3.6488	3.2086	3.0875	2.9342	2.8888
-793	7.0692	3.6596	3.2219	3.0947	2.9446	2.8955
-789.75	7.0996	3.6846	3.2422	3.1161	2.9647	2.9156
-786.5	7.1089	3.6995	3.26	3.1327	2.9811	2.9294
-783.25	7.1156	3.7118	3.2749	3.1472	2.9944	2.9419
-780	7.1417	3.7406	3.3017	3.1693	3.0173	2.9615
-776.75	7.1796	3.7756	3.3291	3.1981	3.0437	2.99
-773.5	7.2263	3.8216	3.3714	3.2358	3.0815	3.0252
-770.25	7.2723	3.8568	3.4053	3.2724	3.1132	3.058
-767	7.3131	3.899	3.447	3.3099	3.1483	3.0945
-763.75	7.3452	3.9367	3.4855	3.3501	3.1862	3.1362
-760.5	7.4207	4.0003	3.5422	3.4047	3.2411	3.1915
-757.25	7.4721	4.0392	3.5837	3.4447	3.2768	3.2336
-754	7.4975	4.0724	3.6147	3.4756	3.3096	3.2656
-750.75	7.5642	4.1153	3.6636	3.5216	3.3549	3.3178
-747.5	7.591	4.1448	3.6883	3.5481	3.3856	3.3442
-744.25	7.609	4.1614	3.7086	3.5655	3.4053	3.3623
-741	7.6275	4.1738	3.7215	3.5771	3.4178	3.3733
-737.75	7.6571	4.1871	3.733	3.5901	3.4333	3.3856
-734.5	7.6546	4.1901	3.7294	3.588	3.4348	3.3808
-731.25	7.6496	4.1932	3.7322	3.5924	3.4367	3.3844
-728	7.6319	4.1857	3.7279	3.5867	3.4371	3.3775
-724.75	7.6484	4.1912	3.7402	3.598	3.4403	3.3845
-721.5	7.6613	4.1958	3.7479	3.6059	3.4494	3.3887
-718.25	7.634	4.1802	3.7392	3.5982	3.4403	3.3801
-715	7.6106	4.1756	3.7386	3.5962	3.4363	3.3755
-711.75	7.6384	4.1986	3.7619	3.6181	3.4568	3.3971
-708.5	7.6548	4.2187	3.789	3.6417	3.4741	3.4157
-705.25	7.667	4.2319	3.8063	3.657	3.4891	3.4309
-702	7.6617	4.2484	3.8182	3.6665	3.4972	3.4411
-698.75	7.6848	4.2593	3.8387	3.6837	3.5136	3.4598
-695.5	7.6763	4.2812	3.8501	3.6995	3.5285	3.4771
-692.25	7.6801	4.2973	3.8651	3.709	3.5463	3.4913
-689	7.6946	4.3216	3.8793	3.7339	3.5642	3.511
-685.75	7.6969	4.3462	3.8981	3.7518	3.5834	3.5306
-682.5	7.6944	4.359	3.9113	3.7674	3.6003	3.5459
-679.25	7.7074	4.3683	3.9207	3.7775	3.612	3.5546
-676	7.7373	4.3893	3.9363	3.7928	3.6303	3.5729
-672.75	7.7556	4.3995	3.9469	3.8034	3.6421	3.5824
-669.5	7.7598	4.4071	3.9597	3.8176	3.6494	3.5927
-666.25	7.8129	4.4412	3.9913	3.8484	3.681	3.6216
-663	7.8	4.4537	4.0028	3.8588	3.6803	3.6264
-659.75	7.8104	4.4647	4.0131	3.8689	3.6963	3.6359
-656.5	7.8471	4.4874	4.0427	3.8931	3.7123	3.6618
-653.25	7.861	4.5023	4.0582	3.9071	3.7283	3.6733
-650	7.9103	4.5315	4.0917	3.9361	3.7526	3.7002
-646.75	7.8903	4.5338	4.0924	3.9433	3.7578	3.7076
-643.5	7.8906	4.5432	4.1099	3.9531	3.7727	3.7201
-640.25	7.9141	4.5659	4.1391	3.9846	3.8005	3.7457
-637	7.9213	4.5786	4.1528	3.9999	3.8158	3.7631
-633.75	7.946	4.6082	4.1847	4.0286	3.8503	3.7963
-630.5	7.9751	4.6468	4.2195	4.0611	3.8791	3.8301
-627.25	8.002	4.68	4.2444	4.0896	3.9131	3.8574
-624	8.0613	4.7144	4.2816	4.122	3.9468	3.8955
-620.75	8.0878	4.7367	4.3022	4.1446	3.9644	3.9147
-617.5	8.0926	4.7613	4.3165	4.1589	3.9804	3.928
-614.25	8.0587	4.758	4.3203	4.1623	3.9785	3.9361
-611	8.0876	4.7852	4.341	4.1812	3.9955	3.9543
-607.75	8.1116	4.8012	4.3492	4.1936	4.0064	3.9642
-604.5	8.1415	4.8162	4.3642	4.2063	4.0158	3.9796
-601.25	8.136	4.8329	4.3796	4.2141	4.0309	3.9904
-598	8.1489	4.8451	4.3893	4.2234	4.0367	3.9983
-594.75	8.1751	4.8642	4.4051	4.2402	4.0537	4.0153
-591.5	8.1911	4.8956	4.4317	4.262	4.0836	4.0392
-588.25	8.2144	4.9236	4.4603	4.2852	4.1114	4.0645
-585	8.224	4.9396	4.4707	4.3024	4.1229	4.0785
-581.75	8.2397	4.9498	4.4873	4.3213	4.1424	4.0956
-578.5	8.2375	4.9518	4.495	4.3352	4.1559	4.108
-575.25	8.266	4.9767	4.5168	4.364	4.1792	4.1261
-572	8.2373	4.9786	4.5231	4.3719	4.1901	4.1385
-568.75	8.2618	4.9972	4.5489	4.3922	4.2123	4.1557
-565.5	8.2719	5.0064	4.5538	4.4066	4.2219	4.173
-562.25	8.2837	5.0324	4.5834	4.4413	4.2456	4.1993
-559	8.3109	5.0572	4.6108	4.4597	4.2822	4.2228
-555.75	8.3389	5.1028	4.6446	4.4948	4.3108	4.2579
-552.5	8.3665	5.1247	4.6774	4.5274	4.344	4.2902
-549.25	8.408	5.1671	4.7142	4.5589	4.3775	4.3227
-546	8.4462	5.2058	4.7442	4.5825	4.4049	4.346
-542.75	8.4778	5.2375	4.7649	4.6086	4.4265	4.3684
-539.5	8.504	5.2467	4.7861	4.6218	4.4408	4.3781
-536.25	8.5485	5.2857	4.815	4.6602	4.4794	4.4151
-533	8.6072	5.336	4.8562	4.7047	4.5326	4.4609
-529.75	8.6404	5.3582	4.8817	4.732	4.5494	4.4862
-526.5	8.672	5.3848	4.9001	4.7492	4.5624	4.5023
-523.25	8.6906	5.4044	4.9264	4.779	4.5834	4.5244
-520	8.7543	5.4386	4.9718	4.8134	4.6143	4.5664
-516.75	8.7933	5.4795	4.9943	4.8351	4.6307	4.5842
-513.5	8.8535	5.5134	5.0414	4.8701	4.6636	4.6172
-510.25	8.8544	5.5204	5.054	4.8835	4.6696	4.6251
-507	8.8603	5.5427	5.0729	4.8992	4.6752	4.6309
-503.75	8.8743	5.5794	5.1101	4.9186	4.7007	4.6578
-500.5	8.9257	5.617	5.1455	4.9573	4.7384	4.6946
-497.25	8.9786	5.6597	5.1924	5.0027	4.7864	4.7364
-494	9.037	5.7251	5.2563	5.0611	4.8517	4.8072
-490.75	9.0821	5.7765	5.312	5.1217	4.9086	4.8593
-487.5	9.1093	5.8205	5.3559	5.1691	4.954	4.913
-484.25	9.1503	5.8606	5.4062	5.2214	5.0006	4.9604
-481	9.2113	5.8958	5.446	5.2688	5.0575	5.0143
-477.75	9.2122	5.9255	5.4786	5.2961	5.0877	5.0474
-474.5	9.2249	5.944	5.5078	5.3296	5.1107	5.0655
-471.25	9.2527	5.9762	5.5372	5.3567	5.1369	5.0927
-468	9.2792	6.0191	5.563	5.3873	5.1686	5.1144
-464.75	9.2931	6.032	5.5872	5.3994	5.1932	5.1259
-461.5	9.3139	6.0505	5.6092	5.4126	5.2133	5.1512
-458.25	9.298	6.0459	5.607	5.4118	5.2048	5.1447
-455	9.3445	6.0897	5.636	5.4432	5.2431	5.184
-451.75	9.3598	6.1016	5.6486	5.4605	5.2696	5.2201
-448.5	9.4334	6.1572	5.6942	5.5144	5.3162	5.2612
-445.25	9.444	6.1778	5.7141	5.5264	5.335	5.2883
-442	9.5049	6.2342	5.7534	5.5686	5.3768	5.3386
-438.75	9.488	6.2313	5.7448	5.5753	5.3747	5.3392
-435.5	9.4998	6.2304	5.7461	5.5745	5.3655	5.3533
-432.25	9.4883	6.2275	5.7482	5.5812	5.365	5.3387
-429	9.4963	6.2469	5.7459	5.5943	5.37	5.3428
-425.75	9.4787	6.2388	5.7485	5.5732	5.3536	5.3382
-422.5	9.444	6.2376	5.7454	5.5639	5.3371	5.316
-419.25	9.4313	6.2303	5.7449	5.5622	5.34	5.3119
-416	9.4489	6.2461	5.7584	5.5886	5.3685	5.3269
-412.75	9.4751	6.274	5.8005	5.6162	5.3928	5.3543
-409.5	9.4607	6.2916	5.8168	5.6329	5.4037	5.3591
-406.25	9.4379	6.2775	5.807	5.622	5.3958	5.3467
-403	9.3953	6.256	5.7874	5.6072	5.3744	5.3268
-399.75	9.4169	6.2742	5.8134	5.6327	5.3902	5.3431
-396.5	9.4261	6.2906	5.8172	5.6365	5.4009	5.3485
-393.25	9.4372	6.3025	5.8403	5.6547	5.4157	5.3661
-390	9.4317	6.2965	5.8394	5.6567	5.4129	5.3686
-386.75	9.495	6.338	5.8777	5.6928	5.4492	5.4065
-383.5	9.5151	6.369	5.9147	5.7085	5.4894	5.4378
-380.25	9.5689	6.4209	5.9588	5.7499	5.5372	5.4968
-377	9.6133	6.4517	5.9941	5.7909	5.5639	5.5294
-373.75	9.6827	6.5091	6.0496	5.834	5.6088	5.5775
-370.5	9.7363	6.5373	6.0723	5.8691	5.6465	5.6062
-367.25	9.7242	6.5375	6.0715	5.8733	5.6394	5.6036
-364	9.7139	6.5321	6.0902	5.8748	5.6459	5.6164
-360.75	9.7598	6.5645	6.1217	5.9071	5.6709	5.6479
-357.5	9.7881	6.6111	6.1453	5.935	5.6953	5.6706
-354.25	9.7737	6.6121	6.1492	5.9518	5.7015	5.6804
-351	9.7344	6.5665	6.1227	5.9356	5.6783	5.6646
-347.75	9.7544	6.585	6.1345	5.9422	5.6942	5.6822
-344.5	9.7921	6.6144	6.1604	5.9668	5.7172	5.7087
-341.25	9.8054	6.6234	6.1792	5.9898	5.7455	5.7316
-338	9.89	6.6822	6.2398	6.0446	5.7985	5.7855
-334.75	9.9548	6.7552	6.2827	6.1033	5.8527	5.8358
-331.5	9.9526	6.7893	6.3021	6.1293	5.8796	5.8618
-328.25	9.9675	6.8226	6.3439	6.177	5.9288	5.9001
-325	10.022	6.8814	6.4031	6.2281	5.968	5.9442
-321.75	10.1273	6.9757	6.4867	6.3009	6.0372	6.0095
-318.5	10.1529	7.0127	6.5118	6.3295	6.0619	6.0462
-315.25	10.1779	7.0233	6.5396	6.343	6.0815	6.0605
-312	10.2544	7.0882	6.5965	6.4009	6.1396	6.1153
-308.75	10.3322	7.1598	6.6659	6.4726	6.2095	6.1728
-305.5	10.3302	7.1777	6.6832	6.4863	6.2111	6.2082
-302.25	10.3478	7.2151	6.7152	6.5225	6.245	6.2417
-299	10.3942	7.2371	6.7398	6.5534	6.302	6.2707
-295.75	10.4151	7.2612	6.7717	6.5778	6.335	6.3097
-292.5	10.4081	7.2925	6.7814	6.6002	6.3583	6.3372
-289.25	10.4167	7.3228	6.8124	6.629	6.3726	6.3515
-286	10.4839	7.3673	6.8538	6.668	6.423	6.4027
-282.75	10.5202	7.3781	6.876	6.6664	6.4378	6.4156
-279.5	10.5023	7.4003	6.9084	6.6809	6.4467	6.4207
-276.25	10.5657	7.4502	6.9489	6.7533	6.5132	6.4758
-273	10.5608	7.4491	6.9792	6.7489	6.5179	6.4822
-269.75	10.6062	7.4861	7.0133	6.7776	6.5204	6.5157
-266.5	10.7003	7.5556	7.0644	6.8243	6.5701	6.5613
-263.25	10.7187	7.5713	7.0856	6.8722	6.5966	6.5899
-260	10.6974	7.5781	7.111	6.8913	6.5929	6.604
-256.75	10.651	7.5788	7.1071	6.8913	6.5831	6.5994
-253.5	10.6481	7.5972	7.1015	6.8697	6.6083	6.6006
-250.25	10.6471	7.5821	7.0968	6.8834	6.5975	6.5878
-247	10.6625	7.6087	7.1209	6.8978	6.6174	6.6373
-243.75	10.6459	7.602	7.1135	6.8667	6.6241	6.6218
-240.5	10.6581	7.6074	7.0945	6.8658	6.6238	6.6094
-237.25	10.6951	7.6183	7.1022	6.8695	6.6523	6.6319
-234	10.6879	7.6393	7.1067	6.8977	6.6908	6.6442
-230.75	10.7016	7.6738	7.1282	6.9217	6.7077	6.6821
-227.5	10.7878	7.7445	7.1893	6.9726	6.7597	6.7454
-224.25	10.8496	7.8298	7.2563	7.0439	6.8376	6.7938
-221	10.8831	7.8822	7.3242	7.1096	6.8751	6.8445
-217.75	10.917	7.9225	7.3506	7.1392	6.9149	6.8754
-214.5	10.9842	7.9935	7.3854	7.2069	6.9663	6.9445
-211.25	10.9992	8.0418	7.433	7.2565	7.0051	6.9808
-208	11.0692	8.0576	7.5041	7.3087	7.0263	7.0064
-204.75	11.1015	8.1118	7.5479	7.3523	7.0655	7.0534
-201.5	11.08	8.118	7.5572	7.3674	7.0832	7.064
-198.25	11.0901	8.1453	7.6069	7.4114	7.1279	7.1043
-195	11.1357	8.206	7.6532	7.4644	7.1575	7.1339
-191.75	11.1889	8.2643	7.6996	7.5189	7.1907	7.1643
-188.5	11.194	8.2694	7.7139	7.5233	7.2002	7.1911
-185.25	11.2485	8.3083	7.771	7.5703	7.2556	7.2473
-182	11.2528	8.3544	7.8194	7.6077	7.284	7.2901
-178.75	11.299	8.405	7.862	7.6303	7.319	7.3448
-175.5	11.3261	8.4318	7.8968	7.6448	7.3282	7.3828
-172.25	11.4223	8.4738	7.9473	7.7013	7.401	7.4535
-169	11.5777	8.576	8.0678	7.8142	7.5084	7.5763
-165.75	11.6116	8.6283	8.1353	7.8529	7.5812	7.6332
-162.5	11.5738	8.6152	8.1188	7.8272	7.5819	7.6585
-159.25	11.6123	8.6465	8.142	7.8653	7.6112	7.6909
-156	11.705	8.7327	8.2148	7.9455	7.6861	7.745
-152.75	11.739	8.7604	8.2614	7.98	7.7334	7.7698
-149.5	11.7579	8.7728	8.2797	8.0026	7.758	7.7939
-146.25	11.7917	8.795	8.2723	8.0103	7.7726	7.7901
-143	11.8598	8.8691	8.3324	8.0752	7.8239	7.8541
-139.75	11.8901	8.8726	8.3137	8.1136	7.8	7.8539
-136.5	11.9315	8.889	8.3488	8.1394	7.8335	7.8625
-133.25	11.8773	8.8385	8.3241	8.123	7.8102	7.8415
-130	11.8169	8.8391	8.3219	8.1336	7.8485	7.8506
-126.75	11.858	8.8727	8.3489	8.1671	7.8756	7.9043
-123.5	11.9365	8.904	8.3849	8.2008	7.8987	7.9213
-120.25	11.9502	8.9305	8.3935	8.2209	7.9044	7.9329
-117	12.0605	9.0032	8.4515	8.2565	7.9548	7.9981
-113.75	12.1483	9.0508	8.5426	8.3378	7.999	8.0817
-110.5	12.214	9.127	8.6179	8.4048	8.0606	8.1252
-107.25	12.1894	9.125	8.6551	8.4056	8.0785	8.1077
-104	12.2182	9.1321	8.6747	8.4255	8.0874	8.1237
-100.75	12.2449	9.1532	8.6724	8.446	8.0919	8.151
-97.5	12.2248	9.2054	8.6602	8.4504	8.0916	8.1716
-94.25	12.27	9.286	8.712	8.495	8.1409	8.2053
-91	12.2857	9.3202	8.7461	8.5085	8.1779	8.2315
-87.75	12.3174	9.3544	8.7805	8.5468	8.2155	8.2528
-84.5	12.325	9.3894	8.7863	8.5724	8.2347	8.3014
-81.25	12.3373	9.4003	8.7654	8.5319	8.2295	8.3114
-78	12.4	9.4122	8.7889	8.5308	8.2232	8.2984
-74.75	12.3995	9.441	8.8118	8.5408	8.2428	8.2938
-71.5	12.4679	9.4625	8.8493	8.5616	8.28	8.3379
-68.25	12.4761	9.4937	8.9049	8.6066	8.3506	8.4075
-65	12.5068	9.5139	8.9104	8.6203	8.3638	8.4222
-61.75	12.5959	9.52	8.9949	8.6586	8.4167	8.4725
-58.5	12.6732	9.5958	9.0633	8.7658	8.4625	8.5141
-55.25	12.6839	9.6373	9.0968	8.8057	8.4593	8.5791
-52	12.6635	9.6445	9.0957	8.803	8.4438	8.565
-48.75	12.6611	9.6608	9.1378	8.865	8.4987	8.5959
-45.5	12.7231	9.6945	9.1536	8.8983	8.5194	8.6055
-42.25	12.7499	9.7378	9.234	8.9553	8.5721	8.6917
-39	12.8348	9.8551	9.3062	9.0473	8.666	8.7931
-35.75	12.7996	9.8424	9.3122	9.0829	8.6914	8.81
-32.5	12.6932	9.8035	9.2863	9.0636	8.6597	8.785
-29.25	12.6465	9.8265	9.2933	9.1161	8.6959	8.819
-26	12.698	9.9241	9.3652	9.1745	8.7998	8.9055
-22.75	12.7658	10.0143	9.3992	9.215	8.8602	8.9666
-19.5	12.8478	10.082	9.4493	9.2533	8.8879	8.9998
-16.25	12.8925	10.0739	9.46	9.2381	8.9043	8.9958
-13	12.972	10.1263	9.5311	9.3074	8.9654	9.0622
-9.75	13.0187	10.2128	9.6564	9.3759	9.0392	9.1647
-6.5	13.0008	10.221	9.6911	9.3795	9.0743	9.2019
-3.25	12.9563	10.2329	9.6831	9.3992	9.0992	9.2177
0	12.9641	10.2334	9.7075	9.4582	9.1145	9.2421
3.25	12.9298	10.2376	9.7459	9.4786	9.1189	9.2675
6.5	12.9346	10.2729	9.7677	9.4902	9.1609	9.287
9.75	12.9486	10.2835	9.8453	9.5468	9.2341	9.3418
13	12.9696	10.3724	9.9172	9.5986	9.3096	9.4112
16.25	13.0242	10.4899	9.9846	9.6903	9.408	9.4955
19.5	13.0774	10.5624	10.0289	9.7548	9.4696	9.5598
22.75	13.1605	10.6274	10.0992	9.8231	9.5295	9.6164
26	13.163	10.5882	10.1096	9.8101	9.52	9.6105
29.25	13.1041	10.6295	10.1232	9.8262	9.5291	9.5856
32.5	13.1302	10.6565	10.1622	9.8468	9.5584	9.604
35.75	13.1255	10.6444	10.1649	9.8824	9.5897	9.6092
39	13.1131	10.6437	10.1666	9.8764	9.5725	9.6271
42.25	13.134	10.6647	10.2026	9.9233	9.5911	9.6967
45.5	13.161	10.6837	10.2546	9.9523	9.6445	9.7759
48.75	13.2245	10.7484	10.2953	9.9785	9.7005	9.8323
52	13.2909	10.7952	10.3161	10.0339	9.7539	9.8924
55.25	13.3572	10.9006	10.3775	10.1204	9.8088	9.96
58.5	13.4114	10.9565	10.4089	10.1543	9.8778	10.0146
61.75	13.5207	11.0145	10.4775	10.208	9.9491	10.1388
65	13.573	11.0147	10.5231	10.2363	10.0045	10.1808
68.25	13.679	11.0907	10.6181	10.3294	10.11	10.2879
71.5	13.7292	11.1131	10.6539	10.3471	10.1616	10.328
74.75	13.71	11.0961	10.6957	10.3298	10.1563	10.3164
78	13.7359	11.1391	10.7258	10.422	10.1997	10.3674
81.25	13.7087	11.1524	10.7534	10.4711	10.2234	10.3763
84.5	13.7805	11.2242	10.8236	10.5413	10.2658	10.4235
87.75	13.9061	11.3402	10.905	10.625	10.3518	10.5491
91	13.9502	11.4111	11.0162	10.6959	10.4249	10.6125
94.25	13.9504	11.4595	11.0929	10.7427	10.5459	10.7217
97.5	13.9662	11.4972	11.1429	10.7754	10.6261	10.7861
100.75	13.9965	11.5612	11.1835	10.8264	10.6769	10.852
104	14.1147	11.6776	11.3082	10.9702	10.8422	11.0085
107.25	14.0988	11.7244	11.3135	11.0072	10.873	11.0369
110.5	14.1519	11.7989	11.336	11.0619	10.9257	11.0812
113.75	14.0679	11.7692	11.3008	11.0452	10.8805	11.0461
117	13.9775	11.7731	11.3058	11.053	10.8983	11.0527
120.25	13.9607	11.8187	11.3079	11.0539	10.8769	11.0511
123.5	13.943	11.8518	11.2554	11.0972	10.8561	11.0413
126.75	14.0229	11.8927	11.336	11.1941	10.9038	11.0735
130	14.0898	11.8765	11.4002	11.2102	10.8858	11.0546
133.25	14.0826	11.8135	11.3566	11.1304	10.8414	10.9465
136.5	14.1147	11.7947	11.3566	11.1083	10.8569	10.9179
139.75	14.2114	11.8181	11.4172	11.1503	10.8882	10.9766
143	14.2291	11.8021	11.4552	11.1272	10.9051	10.9781
146.25	14.2249	11.7702	11.4314	11.1481	10.8957	10.9747
149.5	14.3604	11.7997	11.4896	11.1693	10.9529	11.0257
152.75	14.5003	11.8559	11.5753	11.2234	11.0148	11.0945
156	14.5914	11.896	11.6198	11.2531	11.0488	11.1685
159.25	14.6298	11.9518	11.6706	11.3098	11.0989	11.2591
162.5	14.6212	12.0144	11.7506	11.4184	11.1757	11.3962
165.75	14.6625	12.1209	11.8369	11.5332	11.2654	11.4976
169	14.7769	12.2778	11.9848	11.6768	11.4053	11.6889
172.25	14.9026	12.4795	12.1539	11.8629	11.6021	11.9034
175.5	14.9364	12.5763	12.2624	11.9859	11.7747	12.0643
178.75	15.027	12.7423	12.4193	12.1431	11.9955	12.2494
182	15.094	12.8431	12.5597	12.2697	12.1267	12.4093
185.25	15.2098	12.9422	12.679	12.4028	12.2262	12.564
188.5	15.2577	13.0496	12.7651	12.4788	12.3357	12.7035
191.75	15.3408	13.1464	12.8841	12.5077	12.3559	12.744
195	15.3451	13.1775	12.918	12.5135	12.3463	12.7428
198.25	15.3332	13.1868	12.9184	12.4725	12.2947	12.685
201.5	15.2918	13.1458	12.8577	12.4587	12.2594	12.6343
204.75	15.359	13.2044	12.8266	12.4459	12.2003	12.6216
208	15.3467	13.1611	12.7612	12.3721	12.1172	12.5308
211.25	15.3132	13.0871	12.6767	12.2942	12.0448	12.4014
214.5	15.2284	13.1033	12.6805	12.2954	12.0285	12.368
217.75	15.2158	13.1498	12.7269	12.394	12.1369	12.4012
221	15.1898	13.1265	12.7538	12.3891	12.1724	12.4067
224.25	15.0862	13.1091	12.7497	12.3888	12.2103	12.4494
227.5	15.1017	13.105	12.7867	12.4469	12.2613	12.4833
230.75	15.1566	13.1667	12.8723	12.5692	12.3429	12.5781
234	15.1867	13.2383	12.9351	12.6858	12.4231	12.5871
237.25	15.1889	13.3086	12.962	12.7218	12.4669	12.6393
240.5	15.2434	13.3391	12.975	12.7746	12.4797	12.7009
243.75	15.3124	13.3804	13.0579	12.7993	12.5352	12.7606
247	15.2991	13.4137	13.1179	12.8229	12.5482	12.8006
250.25	15.2823	13.3864	13.1018	12.7928	12.5576	12.8055
253.5	15.3596	13.4294	13.1073	12.8096	12.6179	12.7873
256.75	15.4981	13.5279	13.1933	12.8679	12.7016	12.9013
260	15.5559	13.552	13.2423	12.8981	12.7566	12.9212
263.25	15.7162	13.6336	13.2599	12.939	12.81	12.9826
266.5	15.7387	13.6195	13.2417	12.9671	12.8777	13.0502
269.75	15.8163	13.6774	13.3352	13.0789	12.9887	13.147
273	15.946	13.7635	13.4108	13.1181	13.0493	13.1699
276.25	15.9336	13.7565	13.3973	13.0924	13.0327	13.1753
279.5	16.0487	13.9233	13.5707	13.2322	13.1382	13.3304
282.75	16.184	14.0612	13.7261	13.3069	13.1522	13.4585
286	16.1394	14.1185	13.7594	13.3039	13.1678	13.5206
289.25	16.1656	14.1869	13.7671	13.3716	13.1946	13.5644
292.5	16.1518	14.1817	13.7698	13.3863	13.2232	13.5189
295.75	16.0867	14.2144	13.7833	13.4065	13.2794	13.4934
299	16.0005	14.1778	13.7198	13.3928	13.2468	13.4705
302.25	15.9402	14.1429	13.6883	13.3981	13.2347	13.448
305.5	15.9141	14.0652	13.6589	13.4403	13.2197	13.4315
308.75	15.9346	14.1477	13.6675	13.4552	13.2486	13.4472
312	15.9544	14.1642	13.681	13.443	13.2971	13.4506
315.25	16.0437	14.2191	13.7837	13.5317	13.4114	13.5318
318.5	16.1535	14.2882	13.8622	13.5657	13.528	13.6433
321.75	16.2869	14.3273	13.9676	13.6344	13.6133	13.7541
325	16.3212	14.3554	13.9596	13.6257	13.5993	13.794
328.25	16.406	14.4245	14.0194	13.6545	13.6574	13.8766
331.5	16.4931	14.4993	14.1231	13.7423	13.7671	13.9438
334.75	16.5322	14.5956	14.1918	13.7803	13.8345	13.9886
338	16.557	14.6439	14.2219	13.8286	13.9052	14.0459
341.25	16.5499	14.6767	14.249	13.892	13.9035	14.0578
344.5	16.5632	14.7295	14.3036	13.9704	13.9589	14.1129
347.75	16.558	14.7367	14.3404	14.0043	13.9519	14.152
351	16.5333	14.7452	14.3862	14.0705	13.9008	14.1964
354.25	16.4933	14.7416	14.4273	14.0832	13.8957	14.2175
357.5	16.4162	14.7134	14.4062	14.0624	13.8808	14.1975
360.75	16.4275	14.6641	14.4056	14.0422	13.871	14.2233
364	16.4665	14.6936	14.4035	14.0769	13.9572	14.2631
367.25	16.4545	14.7005	14.5001	14.0815	13.9944	14.2891
370.5	16.4544	14.7404	14.5016	14.0925	14.0223	14.3203
373.75	16.5156	14.773	14.522	14.1072	14.0159	14.3681
377	16.5285	14.7556	14.5285	14.0947	14.0197	14.3547
380.25	16.5058	14.7223	14.4215	14.107	14.0153	14.3014
383.5	16.5572	14.815	14.5	14.1773	14.1499	14.3169
386.75	16.6173	14.8783	14.5551	14.225	14.1844	14.3132
390	16.7361	14.9256	14.641	14.2945	14.2467	14.3186
393.25	16.799	14.9887	14.7791	14.4357	14.3481	14.4532
396.5	16.8043	15.0181	14.7804	14.4693	14.3574	14.4846
399.75	16.9461	15.1426	14.9111	14.5454	14.4439	14.5952
403	16.9896	15.1719	14.9555	14.6317	14.4805	14.6949
406.25	17.018	15.185	14.9428	14.6371	14.5098	14.7216
409.5	17.0448	15.2221	14.9512	14.6365	14.5037	14.7463
412.75	16.9353	15.2929	14.9595	14.6077	14.4664	14.7415
416	16.9054	15.2457	14.932	14.5401	14.4506	14.7616
419.25	16.8804	15.2144	14.8986	14.5139	14.4439	14.7478
422.5	16.7626	15.1757	14.856	14.4283	14.4167	14.6424
425.75	16.8684	15.1828	14.9415	14.5371	14.4868	14.7404
429	17.0223	15.2655	15.0561	14.6945	14.5429	14.8674
432.25	17.1365	15.411	15.16	14.7972	14.6744	14.9767
435.5	17.235	15.51	15.3231	14.8654	14.7888	15.0661
438.75	17.2577	15.5243	15.3283	14.9169	14.7975	15.0936
442	17.2363	15.5029	15.3549	14.9322	14.83	15.1264
445.25	17.341	15.5674	15.395	14.987	14.8667	15.1753
448.5	17.3802	15.6615	15.3594	14.9887	14.8714	15.2206
451.75	17.4404	15.7594	15.3998	15.0557	14.918	15.2832
455	17.5003	15.8422	15.4598	15.1988	14.9736	15.3436
458.25	17.494	15.8251	15.4411	15.1946	14.9864	15.3286
461.5	17.5047	15.8614	15.4732	15.2042	15.0322	15.3303
464.75	17.4727	15.8478	15.5186	15.1745	15.0528	15.3362
468	17.4248	15.8109	15.5549	15.2031	15.0677	15.3228
471.25	17.4686	15.7543	15.5435	15.1623	15.1361	15.2973
474.5	17.6147	15.8884	15.6234	15.2571	15.2181	15.3786
477.75	17.8447	16.0009	15.7071	15.3385	15.3137	15.4915
481	17.8356	16.0116	15.7789	15.3444	15.3831	15.4758
484.25	17.9157	16.0783	15.8294	15.3965	15.481	15.6216
487.5	17.9474	16.1107	15.849	15.4681	15.4997	15.6535
490.75	17.9858	16.1848	15.9311	15.5327	15.5431	15.7171
494	17.987	16.232	15.9628	15.597	15.5606	15.7312
497.25	18.0595	16.2663	16.0087	15.6231	15.5738	15.8153
500.5	18.2104	16.4196	16.1361	15.7609	15.6762	16.0258
503.75	18.2855	16.5185	16.2095	15.8396	15.7423	16.1788
507	18.2354	16.5163	16.2295	15.8817	15.7397	16.2383
510.25	18.1295	16.5002	16.2715	15.8637	15.729	16.2587
513.5	18.0316	16.5309	16.2568	15.8987	15.7172	16.2878
516.75	18.0298	16.4997	16.3026	15.8609	15.7154	16.2668
520	17.9594	16.4792	16.2225	15.7973	15.6731	16.1919
523.25	17.9335	16.5031	16.1371	15.7582	15.6356	16.1101
526.5	17.8959	16.3929	16.1014	15.7682	15.6307	16.0972
529.75	17.9032	16.3737	16.1052	15.7661	15.6792	16.0786
533	17.9489	16.4098	16.0848	15.7513	15.738	16.0375
536.25	17.9861	16.3576	16.0779	15.7687	15.719	16.0608
539.5	18.0461	16.4675	16.131	15.8149	15.7755	16.1638
542.75	18.1478	16.5589	16.2336	15.8863	15.8769	16.2733
546	18.1405	16.5889	16.3427	15.978	16.0368	16.4588
549.25	18.1672	16.6809	16.4306	16.0088	16.1313	16.5673
552.5	18.1754	16.7985	16.4664	16.0022	16.209	16.5891
555.75	18.1685	16.8611	16.5607	16.1049	16.3095	16.687
559	18.2284	16.9497	16.6732	16.154	16.3861	16.7874
562.25	18.1962	16.9468	16.6998	16.1388	16.3558	16.8024
565.5	18.1226	16.8464	16.6306	16.1364	16.2828	16.7405
568.75	18.1472	16.9273	16.6096	16.1956	16.2754	16.7475
572	18.1584	16.8917	16.5833	16.2204	16.2776	16.7467
575.25	18.0878	16.8349	16.4828	16.1463	16.2017	16.6365
578.5	18.1767	16.7895	16.4638	16.1716	16.1603	16.5977
581.75	18.273	16.9382	16.5304	16.2529	16.1672	16.624
585	18.3956	17.0018	16.5644	16.2927	16.2359	16.6935
588.25	18.3862	16.9368	16.5552	16.2592	16.2296	16.6544
591.5	18.4169	16.9404	16.6005	16.3269	16.251	16.6599
594.75	18.472	16.921	16.6262	16.3111	16.1913	16.6297
598	18.5439	16.963	16.7122	16.3802	16.325	16.6571
601.25	18.5345	16.9036	16.6859	16.3377	16.2353	16.6683
604.5	18.4775	16.85	16.6655	16.3333	16.198	16.6446
607.75	18.5436	16.8931	16.7311	16.4203	16.1932	16.7023
611	18.5259	16.9694	16.7439	16.4149	16.1677	16.7202
614.25	18.4088	17.0157	16.763	16.3949	16.1603	16.6921
617.5	18.3817	17.121	16.7946	16.4381	16.2093	16.7238
620.75	18.3502	17.1621	16.7874	16.4325	16.2643	16.7766
624	18.3277	17.1962	16.8434	16.464	16.3351	16.8936
627.25	18.3029	17.2524	16.8731	16.4999	16.3826	16.9539
630.5	18.3853	17.3663	16.9325	16.6125	16.4322	17.0689
633.75	18.4396	17.4369	16.9272	16.6438	16.4776	17.0871
637	18.4684	17.4557	17.0049	16.6335	16.5393	17.052
640.25	18.5211	17.5515	17.0958	16.6833	16.659	17.109
643.5	18.5516	17.5921	17.1614	16.6887	16.706	17.174
646.75	18.6002	17.5558	17.1883	16.7138	16.7595	17.1626
650	18.5628	17.5424	17.2245	16.676	16.7462	17.116
653.25	18.6315	17.5385	17.2781	16.7421	16.8012	17.1031
656.5	18.6389	17.5061	17.153	16.7336	16.7886	17.0244
659.75	18.6737	17.4501	17.1444	16.6879	16.7423	16.9336
663	18.738	17.48	17.1793	16.6902	16.7562	16.8874
666.25	18.7378	17.4459	17.2528	16.7392	16.7469	16.9346
669.5	18.8923	17.5034	17.2461	16.7555	16.7728	17.0007
672.75	18.9355	17.4814	17.308	16.7729	16.8294	17.0493
676	18.9644	17.5749	17.3281	16.7827	16.8925	17.161
679.25	19.1115	17.6551	17.3878	16.8486	16.9644	17.3241
682.5	19.1475	17.7317	17.3915	16.8323	16.9061	17.4177
685.75	19.1617	17.765	17.4044	16.9082	16.9118	17.4797
689	19.2115	17.7946	17.5016	16.9727	16.9659	17.5434
692.25	19.1681	17.7949	17.5	16.996	17.0479	17.5753
695.5	19.2048	17.8034	17.5496	17.0715	17.0781	17.648
698.75	19.1812	17.8267	17.6164	17.1314	17.1083	17.6864
702	19.1202	17.8153	17.6595	17.1336	17.1489	17.6789
705.25	19.1184	17.8605	17.7295	17.2169	17.2073	17.6625
708.5	19.1333	17.9155	17.7584	17.3306	17.193	17.7514
711.75	19.1353	17.9098	17.8423	17.4109	17.2096	17.7568
715	19.1352	17.8648	17.8277	17.4168	17.2248	17.754
718.25	19.1195	17.8919	17.8088	17.4371	17.2549	17.7628
721.5	19.1039	17.8396	17.7081	17.3927	17.244	17.6531
724.75	18.9892	17.8084	17.6438	17.3368	17.1172	17.6169
728	18.9624	17.8218	17.6485	17.2944	17.1006	17.6483
731.25	18.9401	17.7933	17.67	17.2563	17.0471	17.611
734.5	18.9372	17.7662	17.6567	17.1889	16.9705	17.5821
737.75	18.9756	17.8231	17.641	17.1736	16.9852	17.6699
741	19.0639	17.8285	17.5575	17.1311	16.9402	17.6583
744.25	19.043	17.8256	17.5987	17.1588	16.9936	17.6264
747.5	18.9539	17.7799	17.5847	17.1606	16.9983	17.5883
750.75	18.9474	17.7324	17.5914	17.1512	16.9395	17.5762
754	18.9927	17.7189	17.5769	17.1138	16.9467	17.6103
757.25	19.0581	17.6971	17.6033	17.0626	16.9801	17.5834
760.5	19.0707	17.7088	17.5403	17.068	17.0364	17.5025
763.75	19.129	17.6818	17.5398	17.1247	17.0569	17.4836
767	19.1386	17.7507	17.5871	17.1967	17.1414	17.5858
770.25	19.1279	17.8136	17.6964	17.2406	17.1607	17.6778
773.5	19.0579	17.8868	17.7566	17.3078	17.2407	17.7598
776.75	19.1085	18.0073	17.8114	17.3813	17.3166	17.8773
780	19.1752	18.1306	17.8823	17.4471	17.4353	17.9436
783.25	19.2256	18.2847	17.9836	17.5839	17.5125	18.066
786.5	19.2318	18.2572	17.9753	17.5671	17.4887	18.0528
789.75	19.2348	18.1624	17.9405	17.6194	17.4216	17.9859
793	19.2352	18.1534	17.9647	17.6207	17.42	18.0024
796.25	19.266	18.1418	17.9964	17.6714	17.4652	18.0737
799.5	19.2644	18.2027	17.9914	17.7176	17.5182	18.0755
802.75	19.2971	18.2113	17.9652	17.7542	17.5745	18.0961
806	19.2513	18.1939	17.9584	17.757	17.5755	18.0824
809.25	19.2931	18.2396	18.0494	17.7961	17.6232	18.151
812.5	19.3428	18.2643	18.0795	17.8727	17.6947	18.2302
815.75	19.4227	18.4485	18.2366	17.9341	17.8272	18.3859
819	19.405	18.4563	18.2918	17.9305	17.875	18.3816
822.25	19.4376	18.5046	18.3536	17.9379	17.8362	18.4474
825.5	19.4303	18.4981	18.3225	17.8852	17.8587	18.4658
828.75	19.4008	18.4722	18.3213	17.8113	17.838	18.4309
832	19.3934	18.4472	18.3586	17.7711	17.7906	18.37
835.25	19.3346	18.3845	18.2776	17.7652	17.6961	18.3201
838.5	19.4312	18.4387	18.3017	17.849	17.6774	18.3305
841.75	19.4254	18.5185	18.3351	17.9103	17.7674	18.4353
845	19.3698	18.4765	18.2417	17.8933	17.6998	18.403
848.25	19.3732	18.4809	18.3062	17.9223	17.6981	18.4606
851.5	19.3545	18.4211	18.3356	17.9392	17.6923	18.3864
854.75	19.3673	18.4708	18.4246	17.898	17.7347	18.4263
858	19.4711	18.5255	18.4762	17.8231	17.7506	18.4209
861.25	19.5174	18.5592	18.5428	17.8878	17.8478	18.4268
864.5	19.6271	18.6581	18.6641	17.9239	17.9251	18.5071
867.75	19.698	18.6389	18.7182	17.9997	17.9809	18.6053
871	19.6621	18.5483	18.6604	17.9834	17.9349	18.6199
874.25	19.7513	18.5647	18.7202	18.099	18.0366	18.7073
877.5	19.7643	18.6698	18.6943	18.2068	18.1004	18.7333
880.75	19.7792	18.7713	18.717	18.3194	18.1541	18.7441
884	19.6276	18.6348	18.5727	18.2591	18.0517	18.6531
887.25	19.6471	18.671	18.5496	18.3299	18.1024	18.6634
890.5	19.5707	18.7108	18.5448	18.3217	18.0818	18.6379
893.75	19.5039	18.7056	18.5462	18.3132	18.0947	18.636
897	19.4424	18.7245	18.5525	18.2887	18.1144	18.5589
900.25	19.4952	18.7939	18.5435	18.2937	18.1894	18.6282
903.5	19.5007	18.7521	18.5347	18.2428	18.1406	18.6491
906.75	19.4947	18.7604	18.5309	18.2222	18.0789	18.5982
910	19.4784	18.7191	18.548	18.1944	18.0235	18.5926
913.25	19.5156	18.7533	18.6489	18.1928	18.0111	18.6252
916.5	19.555	18.7206	18.6465	18.1851	18.0501	18.7165
919.75	19.5131	18.7323	18.5974	18.2294	18.0251	18.7521
923	19.562	18.7534	18.6489	18.2507	18.047	18.7681
926.25	19.6126	18.7416	18.6718	18.1384	18.0934	18.7439
929.5	19.638	18.738	18.6951	18.2337	18.0809	18.7526
932.75	19.6758	18.7643	18.7282	18.2275	18.1451	18.774
936	19.777	18.7876	18.8191	18.3006	18.1959	18.8413
939.25	19.8033	18.8115	18.8953	18.3341	18.2992	18.9988
942.5	19.8234	18.8477	18.8192	18.3391	18.3708	18.9908
945.75	19.7655	18.8482	18.7506	18.277	18.3283	18.9422
949	19.7061	18.8642	18.736	18.2051	18.2486	18.9117
952.25	19.6761	18.9424	18.773	18.2615	18.246	19.0098
955.5	19.7863	19.0413	18.7569	18.3306	18.3231	19.1163
958.75	19.8044	19.0616	18.7654	18.3631	18.3133	19.1756
962	19.868	19.0796	18.8171	18.4244	18.3158	19.1902
965.25	19.8588	19.0495	18.7931	18.3201	18.2601	19.1002
968.5	19.9011	19.0623	18.8359	18.3082	18.1996	18.9774
971.75	19.9996	19.0843	18.7738	18.3191	18.2445	19.0172
975	20.0443	19.141	18.8076	18.4004	18.3502	19.1479
978.25	20.1338	19.1296	18.8811	18.4592	18.4043	19.2912
981.5	20.1181	19.0748	18.9266	18.4964	18.3932	19.2507
984.75	20.1511	19.1097	18.8998	18.5599	18.4036	19.2671
988	20.1948	19.1711	18.9299	18.5692	18.4346	19.333
991.25	20.1125	19.11	18.8683	18.555	18.4492	19.2195
994.5	20.0021	19.0595	18.8516	18.5572	18.5028	19.1326
997.75	20.0196	19.0168	18.911	18.5942	18.508	19.1882
1001	20.0202	19.0362	18.9813	18.6638	18.4576	19.2048
1004.25	20.0482	19.0567	19.0068	18.6945	18.4283	19.1811
1007.5	20.0131	19.0223	18.9187	18.6465	18.4065	19.0203
1010.75	19.8934	18.901	18.8051	18.556	18.3329	18.9287
1014	19.9151	18.9164	18.7778	18.4793	18.3157	18.95
1017.25	19.9004	18.9268	18.7091	18.4389	18.3015	18.9295
1020.5	19.9014	18.8923	18.5736	18.4376	18.2104	18.8814
1023.75	19.9934	18.9873	18.5826	18.5042	18.2463	18.9319
1027	19.9798	18.9786	18.5956	18.4956	18.303	18.9445
1030.25	20.0325	18.9496	18.6924	18.5045	18.3606	18.9969
1033.5	20.0262	18.9482	18.7719	18.537	18.4832	19.0811
1036.75	19.882	18.9161	18.7269	18.4909	18.4556	19.0569
1040	19.981	19.0282	18.8602	18.5301	18.575	19.1458
1043.25	20.1267	19.0559	18.9165	18.5559	18.6947	19.2178
1046.5	20.0968	19.0343	18.8851	18.4877	18.6159	19.1657
1049.75	20.0367	19.0852	18.9193	18.4841	18.5968	19.2015
1053	20.0959	19.1511	18.9944	18.5341	18.6121	19.2294
1056.25	20.1029	19.2274	18.9859	18.5594	18.5751	19.1931
1059.5	20.1334	19.2574	19.0093	18.5992	18.5505	19.2621
1062.75	20.2354	19.3444	18.9847	18.5774	18.5813	19.2147
1066	20.2822	19.413	19.0744	18.6837	18.6987	19.3019
1069.25	20.2502	19.459	19.0783	18.8046	18.7917	19.3248
1072.5	20.2247	19.4601	19.1092	18.8469	18.8638	19.3628
1075.75	20.0829	19.3439	19.0189	18.8014	18.7583	19.3645
1079	20.0695	19.396	19.0915	18.8802	18.7776	19.4137
1082.25	20.1191	19.4071	19.2176	18.9214	18.8736	19.4943
1085.5	20.1465	19.5082	19.2858	19.0329	19.0535	19.6939
1088.75	20.2211	19.6113	19.3752	19.158	19.1701	19.8995
1092	20.1988	19.5585	19.3759	19.2069	19.2223	19.9317
1095.25	20.1926	19.6074	19.3386	19.1855	19.2143	19.9899
1098.5	20.2227	19.6186	19.3974	19.2392	19.2368	19.9723
1101.75	20.2449	19.6621	19.4604	19.2186	19.2079	19.9688
1105	20.2495	19.6616	19.5122	19.2127	19.1825	19.8664
1108.25	20.2379	19.6863	19.5188	19.1964	19.1221	19.8683
1111.5	20.2219	19.7666	19.526	19.1822	19.069	19.8271
1114.75	20.3199	19.7882	19.4874	19.1627	19.0574	19.8542
1118	20.3799	19.7921	19.5691	19.2003	19.0823	19.9071
1121.25	20.3441	19.7874	19.5106	19.194	19.0361	19.8
1124.5	20.3467	19.813	19.5686	19.1859	19.0368	19.8122
1127.75	20.3771	19.8191	19.5613	19.1891	19.1266	19.7802
1131	20.2836	19.7614	19.4847	19.1452	19.0952	19.7625
1134.25	20.4025	19.8417	19.5522	19.1559	19.1661	19.8742
1137.5	20.491	19.8701	19.6318	19.1865	19.2597	19.9372
1140.75	20.5313	19.8648	19.6198	19.1733	19.2851	20.0197
1144	20.594	19.8473	19.6275	19.142	19.3288	20.0275
1147.25	20.6178	19.8335	19.665	19.1115	19.3293	20.0866
1150.5	20.7394	19.8884	19.7688	19.1703	19.3423	20.2117
1153.75	20.7519	19.8674	19.798	19.1836	19.3438	20.1973
1157	20.777	19.8618	19.8427	19.1855	19.3622	20.2091
1160.25	20.7537	19.8513	19.8965	19.1761	19.3259	20.214
1163.5	20.6979	19.8622	19.8818	19.1538	19.2765	20.1019
1166.75	20.5739	19.8302	19.7779	19.1195	19.2135	20.0431
1170	20.5995	19.8014	19.756	19.1726	19.2709	20.0414
1173.25	20.6868	19.8766	19.7275	19.3041	19.3271	20.1013
1176.5	20.726	19.9315	19.7349	19.4114	19.3696	20.1791
1179.75	20.5961	19.7868	19.6005	19.3669	19.259	20.1443
1183	20.6177	19.7959	19.6315	19.3927	19.3301	20.1504
1186.25	20.5344	19.7405	19.5144	19.2993	19.3516	20.0713
1189.5	20.5039	19.8118	19.4691	19.3195	19.3551	20.0397
1192.75	20.4376	19.7979	19.4867	19.302	19.3425	20.0243
1196	20.3756	19.7652	19.5015	19.2842	19.2975	19.9721
1199.25	20.3377	19.6649	19.4555	19.2951	19.3158	19.9133
1202.5	20.3412	19.718	19.5388	19.2948	19.3472	19.9124
1205.75	20.329	19.7486	19.5556	19.3224	19.3982	19.9331
1209	20.2684	19.8314	19.5696	19.332	19.3673	19.9328
1212.25	20.2052	19.8374	19.6084	19.3398	19.3158	19.9832
1215.5	20.2404	19.8161	19.6061	19.3267	19.3173	20.0187
1218.75	20.2998	19.8453	19.6577	19.3402	19.3423	19.9769
1222	20.2729	19.855	19.6492	19.2966	19.3058	19.9578
1225.25	20.2952	19.8436	19.638	19.2944	19.2677	19.9486
1228.5	20.4141	19.9684	19.7826	19.4346	19.41	20.0425
1231.75	20.361	20.0105	19.8099	19.4771	19.362	20.1262
1235	20.3352	19.9357	19.8418	19.4763	19.32	20.1163
1238.25	20.3162	19.9152	19.8342	19.4675	19.3803	20.116
1241.5	20.3237	19.9125	19.8541	19.474	19.3935	20.0816
1244.75	20.4245	19.9815	19.8215	19.5109	19.4126	20.0633
1248	20.4686	19.9503	19.8148	19.5586	19.4844	20.0868
1251.25	20.5557	19.9883	19.901	19.6378	19.6043	20.093
1254.5	20.5633	20.0207	19.9376	19.6313	19.6655	20.1427
1257.75	20.6605	20.1502	20.001	19.7306	19.7708	20.2213
1261	20.8345	20.2919	20.1069	19.8079	19.8788	20.3345
1264.25	20.9188	20.3296	20.1513	19.8794	19.9233	20.4392
1267.5	20.9809	20.3069	20.1836	19.9201	19.9274	20.522
1270.75	20.9112	20.2407	20.1437	19.7939	19.8503	20.4637
1274	20.8821	20.1581	20.1229	19.7084	19.8497	20.4205
1277.25	20.9023	20.1849	20.1333	19.7472	19.8479	20.4484
1280.5	20.8711	20.2027	20.0217	19.7367	19.8118	20.4753
1283.75	20.8743	20.286	20.0784	19.7692	19.814	20.4898
1287	20.9456	20.2956	20.1043	19.8969	19.7757	20.5214
1290.25	20.961	20.256	20.1821	19.9705	19.7328	20.5449
1293.5	20.879	20.284	20.1667	19.9207	19.6248	20.4621
1296.75	20.8161	20.3121	20.1535	19.9495	19.6728	20.5209
1300	20.7215	20.3674	20.1167	19.8698	19.6954	20.5401
1303.25	20.691	20.4312	20.1359	19.883	19.7451	20.622
1306.5	20.6597	20.4413	20.153	19.9435	19.8363	20.756
1309.75	20.7482	20.4498	20.2319	19.9904	19.9894	20.8453
1313	20.7543	20.4598	20.2956	20.0696	20.0725	20.9161
1316.25	20.7852	20.4839	20.3948	20.1652	20.1483	21.0317
1319.5	20.7796	20.5127	20.4743	20.2285	20.211	21.1424
1322.75	20.6849	20.505	20.4468	20.218	20.2024	21.0958
1326	20.6137	20.4528	20.3953	20.12	20.1549	21.0321
1329.25	20.6082	20.374	20.2672	19.9872	20.1124	20.9645
1332.5	20.6995	20.4135	20.2631	19.9551	20.1218	20.9196
1335.75	20.732	20.4007	20.263	19.9302	20.059	20.9319
1339	20.7142	20.3561	20.1982	19.8788	19.9372	20.8544
1342.25	20.7308	20.3526	20.1538	19.8177	19.9073	20.8464
1345.5	20.753	20.4072	20.1755	19.8687	19.9854	20.77
1348.75	20.7335	20.3661	20.1651	19.868	19.9815	20.6674
1352	20.7308	20.3437	20.2007	19.8383	19.8958	20.7023
1355.25	20.7134	20.2882	20.2276	19.8023	19.918	20.6701
1358.5	20.7294	20.3017	20.2491	19.9708	19.9213	20.7547
1361.75	20.8081	20.3481	20.2537	19.964	19.9952	20.8088
1365	20.7153	20.2911	20.223	19.9367	19.958	20.7478
1368.25	20.6934	20.2359	20.2977	19.8969	19.9565	20.7626
1371.5	20.8078	20.3076	20.3679	19.9517	20.0283	20.8473
1374.75	20.8032	20.2696	20.3587	19.8789	20.0176	20.8558
1378	20.8406	20.2205	20.3791	19.8919	19.9377	20.7789
1381.25	20.8297	20.2673	20.4044	19.8937	19.9838	20.8032
1384.5	20.8269	20.285	20.4143	19.9144	20.0934	20.8164
1387.75	20.8261	20.3427	20.394	19.9026	20.0523	20.7243
1391	20.7397	20.2819	20.3512	19.8328	19.986	20.7394
1394.25	20.741	20.2247	20.3838	19.9121	19.9939	20.7142
1397.5	20.8202	20.2189	20.3513	19.8984	19.9218	20.7049
1400.75	20.8317	20.2986	20.3622	19.9165	19.9893	20.656
1404	20.839	20.3666	20.3477	19.9134	20.0616	20.6826
1407.25	20.8201	20.3592	20.3616	19.9167	20.0402	20.6243
1410.5	20.7925	20.237	20.3498	19.8583	20.0091	20.5873
1413.75	20.6824	20.1776	20.2667	19.7507	19.9308	20.4954
1417	20.6499	20.2131	20.2997	19.7772	19.9694	20.5982
1420.25	20.6949	20.1516	20.3319	19.8523	20.0222	20.7039
1423.5	20.743	20.1995	20.2944	19.9526	20.1093	20.7456
1426.75	20.6311	20.2276	20.242	19.9276	20.0865	20.6847
1430	20.7056	20.2436	20.3087	19.9799	20.1313	20.7541
1433.25	20.7109	20.1346	20.2784	19.9615	20.0461	20.8038
1436.5	20.7446	20.1106	20.2176	19.9585	20.0155	20.7832
1439.75	20.7762	20.0902	20.1787	19.9311	20.0596	20.8395
1443	20.7591	20.0917	20.1332	19.8939	19.9587	20.8545
1446.25	20.774	20.1916	20.1927	19.9161	19.935	20.8393
1449.5	20.8325	20.3002	20.1971	19.9574	19.9376	20.9003
1452.75	20.7453	20.3382	20.2071	19.9556	19.9111	20.924
1456	20.7063	20.4042	20.3201	19.9932	19.9362	20.9049
1459.25	20.7249	20.5145	20.3739	19.9736	19.9953	20.8619
1462.5	20.7411	20.4897	20.4543	20.0807	19.9827	20.8703
1465.75	20.6761	20.4969	20.4248	20.0318	19.9428	20.7754
1469	20.6062	20.4773	20.381	20.0811	19.8509	20.7423
1472.25	20.7441	20.5186	20.4927	20.1452	19.9732	20.8319
1475.5	20.7751	20.5265	20.4856	20.1411	19.9851	20.8348
1478.75	20.762	20.6166	20.4879	20.0276	19.9633	20.8088
1482	20.7097	20.6106	20.4138	19.9344	19.9749	20.709
1485.25	20.7924	20.5125	20.3854	19.9027	20.0319	20.7036
1488.5	20.8986	20.5136	20.3725	19.9086	20.057	20.6987
1491.75	20.9848	20.4179	20.3292	19.9289	20.0862	20.6564
1495	20.9766	20.3695	20.2459	19.9504	20.1544	20.6397
1498.25	20.9709	20.3712	20.2415	19.91	20.109	20.6307
1501.5	20.9714	20.404	20.2508	19.9543	20.1281	20.6924
1504.75	21.0188	20.4597	20.2427	20.0673	20.185	20.6987
1508	21.1291	20.5262	20.3518	20.1604	20.3043	20.8567
1511.25	21.1363	20.5486	20.4465	20.2393	20.2944	20.8819
1514.5	21.159	20.671	20.565	20.3481	20.4046	20.9724
1517.75	21.1486	20.7933	20.6132	20.3955	20.4271	21.0717
1521	21.1325	20.7855	20.5443	20.3329	20.3987	21.0111
1524.25	21.1662	20.7556	20.5102	20.3073	20.4411	20.9589
1527.5	21.1345	20.6286	20.5399	20.3006	20.4673	20.9634
1530.75	20.9297	20.5513	20.4996	20.2181	20.4174	20.9429
1534	20.7579	20.5031	20.4256	20.1099	20.4022	20.8592
1537.25	20.723	20.4719	20.4554	20.0802	20.4402	20.9227
1540.5	20.7372	20.3845	20.3852	20.037	20.3865	20.8645
1543.75	20.7332	20.3559	20.295	20.0703	20.3903	20.8717
1547	20.7244	20.4061	20.3455	20.0898	20.3218	20.8972
1550.25	20.8094	20.4478	20.4047	20.2129	20.3591	20.9841
1553.5	20.7584	20.3853	20.3863	20.2364	20.2324	20.9914
1556.75	20.7459	20.4442	20.4259	20.2419	20.2407	20.9888
1560	20.7334	20.4179	20.4605	20.1775	20.1755	21.0168
1563.25	20.7765	20.4669	20.4502	20.1685	20.1863	21.0705
1566.5	20.7356	20.453	20.4426	20.1006	20.1024	20.9775
1569.75	20.7356	20.5619	20.498	20.0482	20.1661	20.9716
1573	20.7653	20.6886	20.5586	20.0492	20.2738	21.0039
1576.25	20.7639	20.7647	20.5852	20.1015	20.3272	21.0702
1579.5	20.8062	20.7903	20.5483	20.0456	20.385	21.0232
1582.75	20.8835	20.8977	20.5542	19.9936	20.3955	21.0268
1586	20.9114	20.9256	20.511	19.9492	20.4042	21.0367
1589.25	20.9754	20.9362	20.5087	19.9282	20.4651	21.0902
1592.5	20.9342	20.869	20.41	19.8847	20.3508	21.095
1595.75	20.8324	20.8034	20.37	19.8743	20.2333	21.0447
1599	20.7958	20.7758	20.2944	19.9341	20.2215	21.0451
1602.25	20.8164	20.743	20.4246	20.0335	20.2411	21.1048
1605.5	20.7821	20.7374	20.4305	20.0939	20.2573	21.106
1608.75	20.784	20.699	20.455	20.072	20.3104	21.105
1612	20.8986	20.7485	20.4297	20.0795	20.3582	21.0957
1615.25	21.0828	20.7457	20.4926	20.1229	20.2757	21.0951
1618.5	21.0713	20.7423	20.526	20.1722	20.3012	21.0382
1621.75	21.0085	20.6869	20.5315	20.2216	20.3238	21.0075
1625	20.9754	20.6462	20.589	20.3412	20.4101	21.0081
1628.25	21.051	20.6592	20.6331	20.3243	20.3598	20.9263
1631.5	21.0904	20.6696	20.6168	20.4225	20.3669	20.9866
1634.75	21.0458	20.6761	20.6431	20.496	20.4506	20.9816
1638	21.0272	20.6864	20.7454	20.4982	20.4639	21.0572
1641.25	21.0296	20.7243	20.7529	20.514	20.4831	21.0979
1644.5	20.997	20.7673	20.7719	20.5105	20.5164	21.0783
1647.75	20.9911	20.7714	20.762	20.5657	20.5035	21.0973
1651	20.9858	20.7117	20.8236	20.6127	20.5448	21.1872
1654.25	21.0434	20.6913	20.8079	20.6667	20.5402	21.2411
1657.5	21.0492	20.7392	20.8171	20.6259	20.5692	21.2648
1660.75	21.0358	20.7352	20.8322	20.5701	20.5994	21.2567
1664	21.072	20.7261	20.7767	20.5722	20.5093	21.2516
1667.25	21.0394	20.7709	20.7488	20.5518	20.5174	21.2998
1670.5	20.875	20.7651	20.7552	20.4895	20.5593	21.2516
1673.75	20.8823	20.8121	20.7434	20.4831	20.5098	21.2358
1677	20.8492	20.7561	20.7225	20.4738	20.5551	21.2166
1680.25	20.8395	20.8146	20.6791	20.5233	20.4223	21.1563
1683.5	20.8373	20.8529	20.7124	20.6135	20.4042	21.1435
1686.75	20.8816	20.8781	20.6997	20.6296	20.4802	21.168
1690	20.9624	20.9705	20.6724	20.5834	20.5673	21.2047
1693.25	21.028	21.1427	20.6794	20.6464	20.5893	21.2808
1696.5	21.0667	21.2245	20.6881	20.6595	20.5444	21.3493
1699.75	21.0868	21.2865	20.7881	20.5933	20.5493	21.4176
1703	21.1524	21.4086	20.8794	20.589	20.5376	21.4627
1706.25	21.1914	21.3847	20.8684	20.6361	20.6013	21.5679
1709.5	21.1973	21.3899	20.9214	20.619	20.6917	21.539
1712.75	21.2079	21.3636	21.0545	20.6555	20.7895	21.5464
1716	21.1185	21.2424	21.025	20.5796	20.7728	21.4924
1719.25	20.9183	21.1021	20.8915	20.4385	20.5835	21.3911
1722.5	20.9096	21.0831	20.8543	20.5107	20.5707	21.458
1725.75	20.8016	21.0376	20.7964	20.4839	20.4897	21.417
1729	20.8365	21.0389	20.7534	20.4159	20.5024	21.4234
1732.25	20.9149	21.0881	20.8309	20.5169	20.5871	21.4759
1735.5	20.9268	21.0254	20.8212	20.4518	20.5621	21.4711
1738.75	20.9429	20.941	20.795	20.3733	20.5148	21.4862
1742	21.0593	21.0784	20.9313	20.4429	20.4869	21.4115
1745.25	21.1716	21.2047	20.9976	20.5279	20.4628	21.4516
1748.5	21.1702	21.241	21.0095	20.5355	20.4032	21.4798
1751.75	21.2567	21.1853	20.9637	20.6372	20.4046	21.533
1755	21.1846	21.0895	20.961	20.6086	20.3802	21.524
1758.25	21.1313	21.0495	20.9738	20.5472	20.4178	21.5249
1761.5	21.1214	20.9743	20.8973	20.4848	20.4086	21.4676
1764.75	21.1317	20.872	20.7996	20.3989	20.3394	21.4323
1768	21.1332	20.9422	20.8258	20.4418	20.3692	21.4679
1771.25	21.1119	20.9525	20.7841	20.3931	20.4226	21.3942
1774.5	21.0012	20.7265	20.7404	20.2759	20.4285	21.3502
1777.75	21.0248	20.6397	20.6844	20.2779	20.4608	21.3971
1781	21.0688	20.6832	20.7026	20.3444	20.4004	21.4209
1784.25	20.97	20.6613	20.718	20.3878	20.3506	21.3284
1787.5	20.8993	20.6456	20.6876	20.4776	20.3002	21.2988
1790.75	20.8849	20.7271	20.7394	20.5918	20.3371	21.3455
1794	20.7879	20.8464	20.7808	20.5899	20.4098	21.2897
1797.25	20.8713	20.9548	20.899	20.69	20.4641	21.4585
1800.5	20.9643	20.9567	20.984	20.7721	20.5046	21.5698
1803.75	21.0006	21.0258	21.0679	20.8083	20.6198	21.691
1807	21.0295	21.1073	21.1575	20.9011	20.7538	21.7655
1810.25	21.0077	21.0923	21.1705	20.8721	20.7384	21.8043
1813.5	21.0326	21.0683	21.1458	20.7591	20.665	21.8524
1816.75	21.0919	21.0889	21.134	20.6581	20.5715	21.8828
1820	21.129	21.0415	21.1619	20.5633	20.4783	21.9096
1823.25	21.1081	21.0429	21.1087	20.5403	20.4856	21.8379
1826.5	21.0042	21.0303	21.0342	20.4698	20.4954	21.7802
1829.75	21.0001	20.988	20.9787	20.5052	20.5224	21.7488
1833	21.0446	20.9381	20.9413	20.5352	20.566	21.7426
1836.25	21.0962	20.8722	20.9763	20.621	20.6934	21.6134
1839.5	21.1264	20.9264	20.91	20.6043	20.783	21.5064
1842.75	21.1297	20.9362	20.9341	20.66	20.8821	21.4944
1846	21.1872	21.0217	20.9326	20.7506	20.959	21.5318
1849.25	21.2606	21	20.9256	20.703	21.0136	21.5556
1852.5	21.2871	21.0955	20.9619	20.7078	21.0728	21.5597
1855.75	21.283	21.1963	21.0364	20.5657	21.0144	21.5593
1859	21.3366	21.2085	21.0223	20.5263	20.9435	21.5837
1862.25	21.298	21.1572	20.9656	20.4814	20.8761	21.5757
1865.5	21.2104	21.0399	21.0038	20.4258	20.8101	21.4591
1868.75	21.1924	20.8983	20.9188	20.3441	20.7555	21.439
1872	21.0993	20.7639	20.8727	20.3112	20.6895	21.4286
1875.25	21.0261	20.727	20.751	20.3764	20.5821	21.4563
1878.5	21.0294	20.7013	20.6978	20.3353	20.5161	21.3199
1881.75	20.9455	20.6025	20.6213	20.2063	20.3493	21.1048
1885	20.7174	20.3791	20.2858	19.9327	19.9339	20.6984
1888.25	20.7765	20.3053	20.2633	19.8974	19.8835	20.5965
1891.5	20.8953	20.3682	20.3065	19.7986	19.9739	20.5602
1894.75	20.9452	20.5025	20.3848	19.7829	20.0476	20.5641
1898	20.8592	20.527	20.3186	19.741	19.9915	20.5179
1901.25	20.8094	20.4671	20.3656	19.874	20.0665	20.5821
1904.5	20.8187	20.4948	20.367	19.9194	20.2009	20.6135
1907.75	20.8888	20.5957	20.427	19.9771	20.4008	20.7422
1911	20.9318	20.696	20.5185	20.1062	20.5587	21.0572
1914.25	20.9072	20.7365	20.6129	20.2596	20.7023	21.3729
1917.5	20.939	20.8211	20.7686	20.4445	20.9463	21.7689
1920.75	21.0201	20.9475	20.9138	20.5632	21.0096	21.9781
1924	21.1381	20.9242	20.9362	20.5665	20.9221	21.9256
1927.25	21.1577	20.898	20.8755	20.5661	20.7334	21.7847
1930.5	21.2358	21.0023	20.8566	20.5443	20.7011	21.6545
1933.75	21.1585	21.0107	20.747	20.4796	20.5539	21.5292
1937	21.1121	21.0219	20.7535	20.389	20.5175	21.4346
1940.25	21.0548	20.9304	20.7389	20.4372	20.4778	21.3967
1943.5	21.0712	20.8842	20.7842	20.3899	20.506	21.3225
1946.75	21.0193	20.8769	20.6846	20.4644	20.5417	21.2685
1950	21.062	20.8176	20.6485	20.4779	20.5506	21.1916
1953.25	21.104	20.7405	20.7445	20.4731	20.6147	21.2246
1956.5	21.0123	20.6729	20.7575	20.3765	20.5801	21.1267
1959.75	21.033	20.695	20.8211	20.3575	20.5803	21.1598
1963	21.0184	20.7306	20.879	20.4526	20.6148	21.2226
1966.25	20.928	20.6512	20.8172	20.3968	20.5925	21.2244
1969.5	20.9421	20.7385	20.7726	20.3942	20.5704	21.256
1972.75	21.0005	20.7747	20.8184	20.4167	20.5704	21.2888
1976	21.0329	20.7851	20.8654	20.3964	20.4743	21.2267
1979.25	20.9412	20.7775	20.7699	20.349	20.3631	21.1956
1982.5	20.8669	20.7317	20.7529	20.2739	20.2289	21.2272
1985.75	20.8545	20.801	20.8017	20.2916	20.2735	21.2756
1989	20.8373	20.8825	20.7898	20.3467	20.3092	21.2638
1992.25	20.8104	20.9629	20.7382	20.3655	20.3864	21.2351
1995.5	20.7327	20.9552	20.7137	20.359	20.3876	21.1655
1998.75	20.7277	20.9338	20.7392	20.372	20.4308	21.1484
2002	20.8169	21.0241	20.8494	20.4922	20.5684	21.2054
2005.25	20.8799	21.0414	20.9685	20.5385	20.6545	21.2755
2008.5	20.8774	20.9849	21.0367	20.5498	20.6965	21.341
2011.75	21.0399	21.0742	21.1805	20.6084	20.8391	21.4187
2015	21.0586	21.126	21.2026	20.6733	20.8279	21.493
2018.25	21.0554	21.0908	21.216	20.6809	20.7731	21.5201
2021.5	20.9733	21.0263	21.1464	20.5918	20.7366	21.4222
2024.75	20.9191	21.0382	21.0978	20.5664	20.6819	21.4615
2028	20.9372	21.0523	21.0284	20.5962	20.713	21.4089
2031.25	21.015	21.1525	21.1155	20.6386	20.7734	21.4986
2034.5	21.1934	21.2398	21.1413	20.6554	20.758	21.4837
2037.75	21.2671	21.2538	21.1463	20.6802	20.7035	21.4405
2041	21.3203	21.3089	21.1387	20.7576	20.6628	21.4612
2044.25	21.3337	21.3159	21.1155	20.8619	20.6847	21.504
2047.5	21.2709	21.2019	21.0065	20.7485	20.5863	21.4433
2050.75	21.2055	21.1959	20.9818	20.7402	20.6224	21.4326
2054	21.2889	21.2646	21.0403	20.8427	20.6846	21.5868
2057.25	21.2132	21.2257	20.9976	20.6995	20.5931	21.5343
2060.5	21.1712	21.1772	20.9375	20.6587	20.5571	21.4962
2063.75	21.1017	21.1167	20.9911	20.6288	20.5792	21.5665
2067	21.1413	21.1296	20.9849	20.7437	20.7223	21.6866
2070.25	21.1273	21.1063	21.1301	20.7274	20.8112	21.7955
2073.5	21.1252	21.0517	21.2366	20.7716	20.8434	21.9058
2076.75	21.1642	21.1127	21.2871	20.8651	20.951	21.9652
2080	21.1825	21.1045	21.2921	20.876	20.9484	22.0122
2083.25	21.1708	21.2393	21.2372	20.8958	20.9487	22.0124
2086.5	21.2408	21.3221	21.2409	20.9101	21.0062	22.0223
2089.75	21.196	21.3018	21.2126	20.8286	20.9685	21.9068
2093	21.2193	21.4278	21.2384	20.9041	21.002	21.8726
2096.25	21.2022	21.4769	21.324	20.8946	20.9563	21.9294
2099.5	21.268	21.4956	21.3384	20.8722	20.9389	21.9444
2102.75	21.3505	21.5881	21.4135	20.8603	20.999	21.9907
2106	21.3572	21.6323	21.3394	20.8638	20.9826	21.9261
2109.25	21.3815	21.6129	21.2966	20.8804	21.0196	21.9506
2112.5	21.4429	21.5809	21.4145	20.938	21.0381	21.9678
2115.75	21.428	21.5438	21.404	20.9656	21.0756	21.9441
2119	21.4259	21.5823	21.4236	21.1235	21.1457	21.9417
2122.25	21.4355	21.5127	21.3647	21.1183	21.0869	21.9113
2125.5	21.4268	21.4553	21.364	21.1697	21.0337	21.8404
2128.75	21.4665	21.4536	21.3348	21.157	20.9768	21.8147
2132	21.423	21.378	21.2292	21.115	21.0131	21.7721
2135.25	21.4596	21.4195	21.2781	21.1078	21.0854	21.8045
2138.5	21.541	21.4912	21.3198	21.1423	21.1423	21.869
2141.75	21.5988	21.4678	21.3432	21.1303	21.1066	21.8548
2145	21.6618	21.4886	21.3286	21.2049	21.1528	21.8611
2148.25	21.5228	21.4922	21.2884	21.1548	21.1203	21.8554
2151.5	21.5342	21.5009	21.2456	21.1426	21.1578	21.8941
2154.75	21.6216	21.5168	21.2986	21.1463	21.169	21.925
2158	21.5903	21.4003	21.3429	21.0603	21.1396	21.8847
2161.25	21.5957	21.3925	21.3802	21.0118	21.1418	21.987
2164.5	21.5749	21.3668	21.4583	20.9596	21.1291	22.0128
2167.75	21.5345	21.3495	21.5062	20.9469	21.1042	22.0211
2171	21.5793	21.3453	21.6147	20.9995	21.072	22.0548
2174.25	21.5175	21.3084	21.5989	20.9642	21.0346	21.9867
2177.5	21.3444	21.2071	21.6092	20.9481	20.9953	21.9692
2180.75	21.3277	21.2031	21.6086	21.0036	20.9826	21.9571
2184	21.3361	21.2821	21.5837	21.1215	20.9477	22.0201
2187.25	21.2459	21.2987	21.5474	21.0979	20.9416	21.9739
2190.5	21.2665	21.3514	21.5846	21.0989	20.9424	22.0576
2193.75	21.2509	21.3473	21.5526	21.147	20.9412	22.049
2197	21.3007	21.3868	21.4982	21.2167	20.9602	22.0321
2200.25	21.338	21.4333	21.4776	21.1929	21.0103	22.053
2203.5	21.296	21.4353	21.4742	21.1812	20.9767	22.0252
2206.75	21.3212	21.4459	21.5429	21.2424	21.0007	22.0946
2210	21.3174	21.4338	21.55	21.1986	20.983	22.1039
2213.25	21.36	21.4815	21.5739	21.2254	21.0043	22.1702
2216.5	21.3887	21.4971	21.5559	21.2754	21.0144	22.2024
2219.75	21.3335	21.5294	21.5301	21.3171	20.9416	22.1726
2223	21.3695	21.4931	21.4141	21.3092	20.9493	22.1379
2226.25	21.3599	21.546	21.3516	21.1704	20.9166	22.0273
2229.5	21.3382	21.556	21.3466	21.0373	20.8851	21.8707
2232.75	21.4087	21.6032	21.4558	21.0781	20.9396	21.8912
2236	21.3959	21.5189	21.3173	21.0934	20.9787	21.8229
2239.25	21.3399	21.4702	21.3177	21.0953	21.0295	21.8738
2242.5	21.3258	21.3473	21.3529	21.08	21.0694	21.9052
2245.75	21.4086	21.3695	21.4735	21.0804	21.0668	21.8984
2249	21.4705	21.4342	21.5321	21.1136	21.1346	21.9536
2252.25	21.4881	21.4969	21.5193	21.1569	21.0971	21.9467
2255.5	21.5303	21.5775	21.5074	21.2593	21.152	22.0118
2258.75	21.5374	21.5667	21.5717	21.2852	21.2592	21.9982
2262	21.6101	21.6364	21.6129	21.3274	21.3993	22.0874
2265.25	21.5681	21.6644	21.4703	21.1968	21.4362	22.0216
2268.5	21.4973	21.6541	21.3231	21.1643	21.3208	21.822
2271.75	21.5153	21.6308	21.2304	21.1261	21.3384	21.774
2275	21.5281	21.6111	21.2234	21.0461	21.2449	21.6953
2278.25	21.5664	21.5389	21.2204	21.0206	21.1846	21.8376
2281.5	21.4958	21.5031	21.2166	21.0563	21.0813	21.8464
2284.75	21.5337	21.6156	21.2979	21.0959	21.061	21.9182
2288	21.56	21.619	21.3518	21.057	21.0582	21.9557
2291.25	21.5098	21.6694	21.391	21.0435	20.9761	21.9468
2294.5	21.556	21.7169	21.4388	21.0941	20.9827	22.0273
2297.75	21.5226	21.7195	21.5576	21.1506	20.9964	22.1318
2301	21.4682	21.66	21.5745	21.1217	21.0058	22.0469
2304.25	21.472	21.6749	21.5434	21.0603	21.0773	22.0051
2307.5	21.3992	21.5922	21.6104	21.0888	21.078	21.9521
2310.75	21.3564	21.554	21.6605	21.1189	21.0797	21.9878
2314	21.3589	21.5491	21.5909	21.0436	21.0268	21.9101
2317.25	21.4428	21.5321	21.5525	21.0121	21.0301	21.9224
2320.5	21.4976	21.5137	21.601	21.0371	21.0762	21.9522
2323.75	21.4798	21.4003	21.5969	20.9567	21.054	21.8768
2327	21.5564	21.3529	21.5205	20.9951	21.0706	21.793
2330.25	21.6139	21.3585	21.4769	21.0072	20.976	21.8672
2333.5	21.5895	21.361	21.5582	21.1112	20.9925	21.9727
2336.75	21.5822	21.353	21.5137	21.1094	21.0561	21.989
2340	21.5882	21.3273	21.4162	21.071	21.0584	21.9819
2343.25	21.6292	21.4343	21.4106	21.1289	21.0876	22.0433
2346.5	21.5133	21.3672	21.4011	21.1157	21.085	22.0854
2349.75	21.5747	21.4438	21.4794	21.1916	21.072	22.1792
2353	21.6384	21.4493	21.6027	21.267	21.123	22.1903
2356.25	21.6277	21.4985	21.6739	21.2528	21.1393	22.1441
2359.5	21.7531	21.6036	21.7168	21.3665	21.2149	22.21
2362.75	21.7775	21.6861	21.822	21.5285	21.2561	22.2008
2366	21.7319	21.5854	21.7599	21.5394	21.2667	22.0867
2369.25	21.7172	21.6034	21.7747	21.5841	21.3262	22.0949
2372.5	21.6634	21.5224	21.6127	21.4598	21.1913	21.9751
2375.75	21.6312	21.5303	21.5751	21.353	21.1399	21.8824
2379	21.6075	21.5658	21.4719	21.2221	21.1047	21.8352
2382.25	21.6034	21.567	21.4164	21.1974	21.184	21.8762
2385.5	21.514	21.4505	21.3692	21.1365	21.1724	21.8191
2388.75	21.5353	21.3822	21.2448	20.9749	21.094	21.7633
2392	21.4566	21.4338	21.2146	20.8828	21.0539	21.6639
2395.25	21.3993	21.4104	21.2066	20.8592	21.0607	21.6341
2398.5	21.4025	21.4828	21.2562	20.7877	21.0975	21.6907
2401.75	21.3773	21.4077	21.2603	20.7596	21.0475	21.6873
2405	21.4225	21.4188	21.331	20.8136	21.1283	21.77
2408.25	21.4433	21.39	21.3297	20.8557	21.1383	21.774
2411.5	21.4596	21.3967	21.3433	20.9084	21.1543	21.8181
2414.75	21.438	21.478	21.4213	21.027	21.2019	21.8592
2418	21.4562	21.578	21.3676	21.2036	21.1934	21.9103
2421.25	21.4523	21.6565	21.4998	21.3304	21.2807	21.9889
2424.5	21.5278	21.7117	21.6236	21.3843	21.2906	22.036
2427.75	21.4824	21.5478	21.5946	21.3701	21.2702	21.9966
2431	21.5322	21.5281	21.6322	21.4281	21.2883	21.977
2434.25	21.5992	21.4116	21.5762	21.3443	21.3063	21.8452
2437.5	21.6726	21.4979	21.669	21.3745	21.4416	21.9568
2440.75	21.7417	21.631	21.778	21.4321	21.5298	22.0724
2444	21.7264	21.6316	21.7897	21.4168	21.5237	22.0549
2447.25	21.6911	21.6286	21.7452	21.3629	21.4956	22.0069
2450.5	21.6612	21.6533	21.7515	21.3162	21.4591	22.0323
2453.75	21.6179	21.6414	21.7212	21.3274	21.5425	22.1474
2457	21.6853	21.5849	21.6609	21.2929	21.5688	22.1551
2460.25	21.6288	21.4137	21.5999	21.2405	21.5549	22.1633
2463.5	21.6029	21.4788	21.6223	21.2277	21.5283	22.1883
2466.75	21.6922	21.4998	21.6163	21.2341	21.4231	22.1186
2470	21.8161	21.5327	21.6809	21.3926	21.4377	22.1458
2473.25	21.7863	21.4753	21.6218	21.3722	21.2463	22.0461
2476.5	21.8154	21.406	21.5698	21.3368	21.1463	22.0032
2479.75	21.7711	21.4034	21.5978	21.3307	21.04	21.9629
2483	21.7446	21.3315	21.5534	21.2897	20.9729	21.8601
2486.25	21.7371	21.428	21.5296	21.2847	21.0143	21.8553
2489.5	21.7142	21.5571	21.6334	21.2937	21.0583	21.9243
2492.75	21.8019	21.852	21.7189	21.4356	21.2451	22.0652
2496	21.7324	21.8717	21.6803	21.4887	21.256	22.1113
2499.25	21.6704	21.9188	21.6946	21.4286	21.3101	22.1117
2502.5	21.6131	22.0015	21.8012	21.4702	21.3818	22.1606
2505.75	21.495	21.8486	21.7688	21.4284	21.3386	22.1049
2509	21.4789	21.7017	21.6843	21.3893	21.2716	21.9836
2512.25	21.3957	21.6198	21.5316	21.2784	21.1198	21.8711
2515.5	21.2939	21.6174	21.4976	21.1827	21.1136	21.9172
2518.75	21.2468	21.5179	21.4551	21.2021	21.107	21.8314
2522	21.211	21.4518	21.3957	21.215	21.082	21.8165
2525.25	21.2015	21.3836	21.304	21.1957	20.9995	21.8406
2528.5	21.1767	21.3617	21.3105	21.185	20.9986	21.8428
2531.75	21.2276	21.2681	21.2791	21.2337	20.955	21.8487
2535	21.3095	21.2742	21.3224	21.3074	20.9738	21.8454
2538.25	21.2986	21.3421	21.3528	21.303	20.9696	21.9188
2541.5	21.3338	21.3988	21.4473	21.3563	21.1122	21.9894
2544.75	21.3357	21.399	21.485	21.2758	21.0729	21.9249
2548	21.3717	21.466	21.6245	21.315	21.0715	22.0708
2551.25	21.4385	21.5088	21.7174	21.3425	21.1026	22.2104
2554.5	21.4778	21.5173	21.8001	21.3167	21.0963	22.3519
2557.75	21.4971	21.5375	21.8404	21.2926	21.2063	22.4408
2561	21.4716	21.52	21.8662	21.3008	21.2921	22.4126
2564.25	21.5321	21.5319	21.8541	21.2887	21.2871	22.4734
2567.5	21.5934	21.6014	21.7732	21.2502	21.252	22.4794
2570.75	21.6245	21.535	21.7761	21.2636	21.2374	22.4013
2574	21.5691	21.4768	21.7176	21.202	21.1627	22.3664
2577.25	21.5217	21.3776	21.6865	21.2598	21.1399	22.2756
2580.5	21.5987	21.4538	21.6583	21.3058	21.1903	22.3221
2583.75	21.6039	21.4778	21.6105	21.3363	21.2873	22.2333
2587	21.609	21.4082	21.656	21.349	21.3469	22.2043
2590.25	21.5187	21.3138	21.6138	21.2885	21.3194	22.1752
2593.5	21.5987	21.3576	21.6793	21.2752	21.2812	22.1885
2596.75	21.7274	21.3883	21.7041	21.351	21.3399	22.2312
2600	21.6676	21.2967	21.7069	21.2889	21.2863	22.1226
2603.25	21.6665	21.3861	21.7007	21.3487	21.3299	22.1961
2606.5	21.5931	21.3294	21.5925	21.2976	21.2191	22.1045
2609.75	21.6396	21.3802	21.5755	21.338	21.2313	22.162
2613	21.5663	21.3751	21.4729	21.2663	21.2155	22.1117
2616.25	21.5444	21.454	21.4811	21.2179	21.2417	22.1318
2619.5	21.5038	21.3798	21.4155	21.2128	21.1911	22.104
2622.75	21.4544	21.3376	21.4432	21.161	21.1297	22.0167
2626	21.3597	21.3394	21.4273	21.1337	21.05	21.9835
2629.25	21.3207	21.3321	21.4559	21.1378	21.0483	21.887
2632.5	21.3194	21.3466	21.3938	21.063	20.9958	21.9092
2635.75	21.3412	21.2726	21.4503	21.1391	20.9291	21.9583
2639	21.4155	21.3195	21.5036	21.2144	20.9785	22.0432
2642.25	21.4867	21.2683	21.5368	21.2406	21.0692	22.037
2645.5	21.5606	21.2873	21.5718	21.2656	21.211	22.099
2648.75	21.6042	21.345	21.5921	21.2102	21.2662	22.063
2652	21.5318	21.3483	21.5635	21.127	21.2446	22.1016
2655.25	21.5614	21.3186	21.6706	21.2091	21.3444	22.1833
2658.5	21.6088	21.3392	21.6705	21.2514	21.4727	22.1692
2661.75	21.5993	21.336	21.6989	21.2937	21.4288	22.1234
2665	21.5267	21.3214	21.688	21.2543	21.3863	22.0728
2668.25	21.4492	21.3143	21.7098	21.2183	21.3506	21.9989
2671.5	21.4494	21.2723	21.7395	21.2129	21.3891	21.9641
2674.75	21.459	21.2337	21.7518	21.1978	21.4074	21.9601
2678	21.4071	21.3411	21.6843	21.2407	21.3386	21.9723
2681.25	21.5422	21.5126	21.722	21.3258	21.3959	22.124
2684.5	21.6152	21.5773	21.805	21.382	21.4467	22.2428
2687.75	21.6215	21.61	21.8225	21.4049	21.4062	22.3052
2691	21.6401	21.6204	21.7573	21.4444	21.3823	22.218
2694.25	21.612	21.6822	21.7438	21.4723	21.3696	22.1788
2697.5	21.6287	21.7828	21.7871	21.5503	21.3458	22.125
2700.75	21.5799	21.7724	21.8903	21.574	21.3967	22.1182
2704	21.6536	21.7955	21.882	21.6145	21.4606	22.1205
2707.25	21.7262	21.8293	21.915	21.6238	21.4219	22.2461
2710.5	21.7059	21.8683	21.9251	21.6924	21.3932	22.2337
2713.75	21.7864	21.901	21.9883	21.7803	21.406	22.3504
2717	21.8211	21.8546	21.9835	21.7725	21.3247	22.2634
2720.25	21.7984	21.924	21.9973	21.7967	21.3173	22.351
2723.5	21.7492	21.8983	21.9451	21.7432	21.3266	22.3962
2726.75	21.7212	21.9161	21.8987	21.7156	21.3933	22.4611
2730	21.6215	21.7886	21.8141	21.5738	21.3517	22.4457
2733.25	21.555	21.7142	21.6174	21.4487	21.2454	22.3958
2736.5	21.538	21.6	21.6556	21.4579	21.2164	22.3013
2739.75	21.5812	21.4854	21.5901	21.4178	21.2209	22.2313
2743	21.5394	21.4088	21.6343	21.3149	21.2044	22.1084
2746.25	21.5418	21.4488	21.7308	21.2405	21.3125	22.1753
2749.5	21.553	21.4959	21.7078	21.196	21.3358	22.1298
2752.75	21.5013	21.4593	21.6801	21.1966	21.3007	22.1656
2756	21.4949	21.4519	21.6722	21.2576	21.2214	22.1979
2759.25	21.5598	21.4459	21.7181	21.3033	21.2381	22.2226
2762.5	21.5641	21.4065	21.68	21.41	21.2632	22.2194
2765.75	21.6571	21.5346	21.7067	21.519	21.282	22.333
2769	21.6115	21.645	21.7184	21.5158	21.2663	22.4558
2772.25	21.8242	21.7408	21.7626	21.6196	21.3809	22.5286
2775.5	21.8965	21.7668	21.804	21.6922	21.4747	22.5938
2778.75	21.9274	21.7482	21.7719	21.6618	21.4648	22.6264
2782	21.9453	21.7586	21.7491	21.6702	21.5187	22.6038
2785.25	21.9567	21.7433	21.7582	21.7104	21.4975	22.6432
2788.5	22.0062	21.7831	21.7917	21.7731	21.5166	22.6087
2791.75	21.8756	21.7012	21.7513	21.6638	21.4049	22.4875
2795	21.8465	21.7154	21.7443	21.5948	21.344	22.3958
2798.25	21.7526	21.7165	21.6047	21.5665	21.3538	22.3492
2801.5	21.8084	21.8429	21.6543	21.5731	21.4465	22.3934
2804.75	21.7795	21.8798	21.713	21.566	21.4458	22.2992
2808	21.7211	21.9486	21.7272	21.5974	21.4292	22.2296
2811.25	21.6802	21.8801	21.741	21.6098	21.3203	22.1929
2814.5	21.6639	21.8682	21.7492	21.5717	21.2888	22.1472
2817.75	21.6612	21.868	21.8073	21.5313	21.3144	22.1154
2821	21.6768	21.8442	21.8887	21.5192	21.3243	22.0537
2824.25	21.7101	21.8442	21.9928	21.5446	21.3466	22.0677
2827.5	21.72	21.752	21.9312	21.5492	21.3166	21.9795
2830.75	21.8103	21.6179	21.9082	21.5108	21.3414	22.0197
2834	21.7905	21.6593	21.921	21.4588	21.3401	21.9877
2837.25	21.8198	21.6652	21.8797	21.5215	21.3825	22.0284
2840.5	21.8729	21.7228	21.7541	21.5502	21.444	22.1272
2843.75	21.8379	21.7973	21.7548	21.5796	21.471	22.2607
2847	21.7334	21.8556	21.7817	21.5452	21.4818	22.4468
2850.25	21.6798	21.9179	21.7074	21.5191	21.4894	22.5226
2853.5	21.5458	21.8645	21.5862	21.4401	21.374	22.454
2856.75	21.6117	21.8097	21.5587	21.4386	21.3153	22.5066
2860	21.614	21.7372	21.5904	21.3974	21.3283	22.4988
2863.25	21.5812	21.7477	21.6328	21.4375	21.3046	22.416
2866.5	21.5632	21.7007	21.5864	21.3668	21.0921	22.3326
2869.75	21.631	21.7334	21.5829	21.4282	21.1807	22.3965
2873	21.7075	21.6997	21.6626	21.3971	21.228	22.286
2876.25	21.7889	21.6898	21.7042	21.4238	21.3576	22.3249
2879.5	21.6927	21.6786	21.7047	21.3281	21.3619	22.2751
2882.75	21.6038	21.6406	21.6829	21.2246	21.4059	22.3661
2886	21.6449	21.6215	21.7367	21.159	21.3821	22.2766
2889.25	21.698	21.6671	21.8241	21.1841	21.399	22.2827
2892.5	21.6258	21.7227	21.9371	21.1759	21.4115	22.3157
2895.75	21.5375	21.6995	21.9139	21.1807	21.3399	22.3216
2899	21.5428	21.6343	21.9193	21.185	21.3319	22.262
2902.25	21.5111	21.617	21.8566	21.1889	21.2647	22.1872
2905.5	21.4415	21.6086	21.7838	21.1246	21.2154	22.0854
2908.75	21.3824	21.5004	21.7273	21.1321	21.1477	22.001
2912	21.3286	21.4217	21.6476	21.0634	21.1311	21.9796
2915.25	21.4894	21.4563	21.6991	21.1452	21.2288	21.9575
2918.5	21.4888	21.4587	21.6372	21.138	21.1844	21.9514
2921.75	21.4435	21.3945	21.5943	21.1113	21.1068	21.9861
2925	21.4804	21.4993	21.5324	21.1326	21.2048	22.1053
2928.25	21.5277	21.5792	21.5639	21.1668	21.1619	22.1334
2931.5	21.6192	21.6665	21.6839	21.3092	21.2539	22.2651
2934.75	21.6669	21.6943	21.6577	21.4591	21.2675	22.2497
2938	21.6435	21.6904	21.6823	21.509	21.3246	22.3472
2941.25	21.7027	21.7219	21.6919	21.5363	21.3606	22.3678
2944.5	21.6228	21.676	21.6273	21.5493	21.3028	22.319
2947.75	21.5569	21.6477	21.6497	21.5338	21.4487	22.3354
2951	21.4354	21.6746	21.644	21.5201	21.4507	22.2812
2954.25	21.4288	21.7523	21.6258	21.5943	21.4808	22.3264
2957.5	21.5333	21.7758	21.6246	21.5369	21.5387	22.3097
2960.75	21.4136	21.709	21.6112	21.3849	21.514	22.2629
2964	21.4362	21.7391	21.7219	21.4118	21.6236	22.352
2967.25	21.5517	21.7746	21.7707	21.494	21.6025	22.4531
2970.5	21.6333	21.7679	21.8088	21.5095	21.7147	22.491
2973.75	21.7848	21.8981	21.9361	21.6237	21.7714	22.5621
2977	21.802	21.8709	21.9532	21.6851	21.7904	22.536
2980.25	21.8563	21.9504	21.9891	21.7397	21.8804	22.5599
2983.5	21.8398	21.8516	21.9322	21.7246	21.8697	22.4466
2986.75	21.8765	21.8923	21.9242	21.7809	21.8892	22.4536
[truncated: 138 more rows]
