# Supplementary material for: Hypoxia triggers collective aerotactic migration in Dictyostelium discoideum
Source: eLife. 2021 Aug 20;10:e64731. doi: 10.7554/eLife.64731 (PMC8378850; doi:10.7554/eLife.64731)
Supplement: Figure 2—figure supplement 7—source data 1. [file elife-64731-fig2-figsupp7-data1.xlsx]

## Sheet: Figure 2 figure supplement 7
Figure 2 figure supplement 7
distance from the center [mm]	% O2 without cells	% O2 with cells	difference
5	20.9933	20.1571	0.836164
4.98	20.9933	20.16	0.833288
4.96	20.9933	20.1629	0.830411
4.94	20.9933	20.1667	0.826575
4.92	20.9933	20.1696	0.823699
4.9	20.9933	20.1725	0.820822
4.88	20.9942	20.1763	0.817945
4.86	20.9942	20.1792	0.815068
4.84	20.9942	20.183	0.811233
4.82	20.9942	20.1868	0.807397
4.8	20.9942	20.1907	0.803562
4.78	20.9942	20.1936	0.800685
4.76	20.9942	20.1974	0.796849
4.74	20.9942	20.2012	0.793014
4.72	20.9942	20.2051	0.789178
4.7	20.9942	20.2089	0.785342
4.68	20.9942	20.2127	0.781507
4.66	20.9952	20.2166	0.77863
4.64	20.9952	20.2204	0.774795
4.62	20.9952	20.2242	0.770959
4.6	20.9952	20.229	0.766164
4.58	20.9952	20.2329	0.762329
4.56	20.9952	20.2367	0.758493
4.54	20.9952	20.2405	0.754658
4.52	20.9952	20.2453	0.749863
4.5	20.9952	20.2492	0.746027
4.48	20.9952	20.254	0.741233
4.46	20.9952	20.2588	0.736438
4.44	20.9962	20.2626	0.733562
4.42	20.9962	20.2674	0.728767
4.4	20.9962	20.2722	0.723973
4.38	20.9962	20.277	0.719178
4.36	20.9962	20.2818	0.714384
4.34	20.9962	20.2856	0.710548
4.32	20.9962	20.2904	0.705753
4.3	20.9962	20.2962	0.7
4.28	20.9962	20.301	0.695205
4.26	20.9962	20.3058	0.690411
4.24	20.9962	20.3115	0.684658
4.22	20.9962	20.3163	0.679863
4.2	20.9971	20.3211	0.676027
4.18	20.9971	20.3268	0.670274
4.16	20.9971	20.3316	0.665479
4.14	20.9971	20.3364	0.660685
4.12	20.9971	20.3422	0.654932
4.1	20.9971	20.3479	0.649178
4.08	20.9971	20.3537	0.643425
4.06	20.9971	20.3585	0.63863
4.04	20.9971	20.3642	0.632877
4.02	20.9971	20.37	0.627123
4	20.9971	20.3748	0.622329
3.98	20.9971	20.3805	0.616575
3.96	20.9981	20.3863	0.611781
3.94	20.9981	20.3921	0.606027
3.92	20.9981	20.3978	0.600274
3.9	20.9981	20.4036	0.594521
3.88	20.9981	20.4093	0.588767
3.86	20.9981	20.4151	0.583014
3.84	20.9981	20.4208	0.57726
3.82	20.9981	20.4266	0.571507
3.8	20.9981	20.4323	0.565753
3.78	20.9981	20.4381	0.56
3.76	20.9981	20.4429	0.555205
3.74	20.9981	20.4486	0.549452
3.72	20.9981	20.4544	0.543699
3.7	20.999	20.4592	0.539863
3.68	20.999	20.4649	0.53411
3.66	20.999	20.4707	0.528356
3.64	20.999	20.4755	0.523562
3.62	20.999	20.4812	0.517808
3.6	20.999	20.486	0.513014
3.58	20.999	20.4899	0.509178
3.56	20.999	20.4947	0.504384
3.54	20.999	20.4985	0.500548
3.52	20.999	20.5033	0.495753
3.5	20.999	20.5081	0.490959
3.48	20.999	20.5119	0.487123
3.46	20.999	20.5167	0.482329
3.44	20.999	20.5205	0.478493
3.42	20.999	20.5234	0.475616
3.4	20.999	20.5263	0.47274
3.38	20.999	20.5292	0.469863
3.36	20.999	20.5321	0.466986
3.34	20.999	20.5349	0.46411
3.32	20.999	20.5378	0.461233
3.3	21	20.5407	0.459315
3.28	21	20.5426	0.457397
3.26	21	20.5455	0.454521
3.24	21	20.5474	0.452603
3.22	21	20.5493	0.450685
3.2	21	20.5503	0.449726
3.18	21	20.5522	0.447808
3.16	21	20.5532	0.446849
3.14	21	20.5551	0.444932
3.12	21	20.556	0.443973
3.1	21	20.5579	0.442055
3.08	21	20.5589	0.441096
3.06	21	20.5599	0.440137
3.04	21	20.5608	0.439178
3.02	21	20.5618	0.438219
3	21	20.5627	0.43726
2.98	21	20.5637	0.436301
2.96	21	20.5637	0.436301
2.94	21	20.5647	0.435342
2.92	21	20.5656	0.434384
2.9	21	20.5666	0.433425
2.88	21	20.5666	0.433425
2.86	21	20.5666	0.433425
2.84	21	20.5675	0.432466
2.82	21	20.5675	0.432466
2.8	21	20.5675	0.432466
2.78	21	20.5685	0.431507
2.76	20.999	20.5685	0.430548
2.74	20.999	20.5695	0.429589
2.72	20.999	20.5695	0.429589
2.7	20.999	20.5695	0.429589
2.68	20.999	20.5695	0.429589
2.66	20.999	20.5695	0.429589
2.64	20.999	20.5695	0.429589
2.62	20.999	20.5704	0.42863
2.6	20.999	20.5704	0.42863
2.58	20.999	20.5704	0.42863
2.56	20.999	20.5704	0.42863
2.54	20.999	20.5704	0.42863
2.52	20.999	20.5704	0.42863
2.5	20.999	20.5704	0.42863
2.48	20.999	20.5704	0.42863
2.46	20.999	20.5704	0.42863
2.44	20.9981	20.5704	0.427671
2.42	20.9981	20.5704	0.427671
2.4	20.9981	20.5704	0.427671
2.38	20.9981	20.5704	0.427671
2.36	20.9981	20.5704	0.427671
2.34	20.9981	20.5704	0.427671
2.32	20.9971	20.5695	0.427671
2.3	20.9971	20.5695	0.427671
2.28	20.9971	20.5695	0.427671
2.26	20.9971	20.5695	0.427671
2.24	20.9971	20.5695	0.427671
2.22	20.9962	20.5685	0.427671
2.2	20.9962	20.5685	0.427671
2.18	20.9962	20.5685	0.427671
2.16	20.9952	20.5685	0.426712
2.14	20.9952	20.5675	0.427671
2.12	20.9942	20.5675	0.426712
2.1	20.9942	20.5666	0.427671
2.08	20.9942	20.5666	0.427671
2.06	20.9933	20.5656	0.427671
2.04	20.9933	20.5656	0.427671
2.02	20.9923	20.5647	0.427671
2	20.9914	20.5647	0.426712
1.98	20.9904	20.5637	0.426712
1.96	20.9904	20.5627	0.427671
1.94	20.9895	20.5618	0.427671
1.92	20.9885	20.5608	0.427671
1.9	20.9875	20.5599	0.427671
1.88	20.9866	20.5589	0.427671
1.86	20.9856	20.5589	0.426712
1.84	20.9847	20.557	0.427671
1.82	20.9827	20.556	0.426712
1.8	20.9808	20.5541	0.426712
1.78	20.9799	20.5522	0.427671
1.76	20.9779	20.5503	0.427671
1.74	20.976	20.5484	0.427671
1.72	20.9741	20.5474	0.426712
1.7	20.9722	20.5455	0.426712
1.68	20.9712	20.5436	0.427671
1.66	20.9684	20.5407	0.427671
1.64	20.9645	20.5378	0.426712
1.62	20.9616	20.534	0.427671
1.6	20.9578	20.5301	0.427671
1.58	20.954	20.5273	0.426712
1.56	20.9511	20.5234	0.427671
1.54	20.9473	20.5196	0.427671
1.52	20.9434	20.5167	0.426712
1.5	20.9396	20.5129	0.426712
1.48	20.9338	20.5062	0.427671
1.46	20.9262	20.4985	0.427671
1.44	20.9195	20.4918	0.427671
1.42	20.9118	20.4841	0.427671
1.4	20.9041	20.4764	0.427671
1.38	20.8964	20.4697	0.426712
1.36	20.8897	20.4621	0.427671
1.34	20.8821	20.4544	0.427671
1.32	20.8734	20.4458	0.427671
1.3	20.86	20.4323	0.427671
1.28	20.8456	20.4179	0.427671
1.26	20.8312	20.4036	0.427671
1.24	20.8168	20.3892	0.427671
1.22	20.8025	20.3748	0.427671
1.2	20.7881	20.3604	0.427671
1.18	20.7737	20.346	0.427671
1.16	20.7584	20.3307	0.427671
1.14	20.7363	20.3077	0.42863
1.12	20.7056	20.2779	0.427671
1.1	20.6759	20.2473	0.42863
1.08	20.6452	20.2166	0.42863
1.06	20.6155	20.1868	0.42863
1.04	20.5848	20.1562	0.42863
1.02	20.5551	20.1255	0.429589
1	20.5244	20.0948	0.429589
0.98	20.4918	20.0632	0.42863
0.96	20.4448	20.0152	0.429589
0.94	20.3853	19.9558	0.429589
0.92	20.3259	19.8963	0.429589
0.9	20.2664	19.8368	0.429589
0.88	20.2079	19.7774	0.430548
0.86	20.1485	19.7179	0.430548
0.84	20.089	19.6585	0.430548
0.82	20.0305	19.599	0.431507
0.8	19.9625	19.531	0.431507
0.78	19.8656	19.4332	0.432466
0.76	19.7515	19.319	0.432466
0.74	19.6374	19.2049	0.432466
0.72	19.5233	19.0899	0.433425
0.7	19.4092	18.9758	0.433425
0.68	19.2951	18.8607	0.434384
0.66	19.181	18.7466	0.434384
0.64	19.0668	18.6325	0.434384
0.62	18.9345	18.4992	0.435342
0.6	18.7562	18.3199	0.436301
0.58	18.5634	18.1262	0.43726
0.56	18.3697	17.9325	0.43726
0.54	18.177	17.7388	0.438219
0.52	17.9842	17.5451	0.439178
0.5	17.7915	17.3514	0.440137
0.48	17.5978	17.1577	0.440137
0.46	17.4051	16.964	0.441096
0.44	17.1855	16.7434	0.442055
0.42	16.9256	16.4826	0.443014
0.4	16.66	16.217	0.443014
0.38	16.3953	15.9514	0.443973
0.36	16.1307	15.6848	0.44589
0.34	15.8651	15.4192	0.44589
0.32	15.6004	15.1536	0.446849
0.3	15.3348	14.8879	0.446849
0.28	15.0701	14.6223	0.447808
0.26	14.7777	14.3289	0.448767
0.24	14.467	14.0173	0.449726
0.22	14.1563	13.7056	0.450685
0.2	13.8447	13.3949	0.449726
0.18	13.534	13.0833	0.450685
0.16	13.2233	12.7726	0.450685
0.14	12.9126	12.461	0.451644
0.12	12.6019	12.1493	0.452603
0.1	12.2893	11.8367	0.452603
0.08	11.9662	11.5126	0.453562
0.06	11.6392	11.1866	0.452603
0.04	11.3132	10.8596	0.453562
0.02	10.9871	10.5336	0.453562
5.0822e-18	10.6601	10.2075	0.452603
-0.02	10.3341	9.88055	0.453562
-0.04	10.0081	9.55442	0.453658
-0.06	9.6811	9.22801	0.453082
-0.08	9.35564	8.90218	0.453466
-0.1	9.03441	8.58123	0.453178
-0.12	8.71797	8.26527	0.452699
-0.14	8.40153	7.94932	0.452219
-0.16	8.085	7.63345	0.451548
-0.18	7.76856	7.31749	0.451068
-0.2	7.45212	7.00153	0.450589
-0.22	7.13568	6.68558	0.45011
-0.24	6.81925	6.36962	0.44963
-0.26	6.5123	6.06325	0.449055
-0.28	6.23144	5.78315	0.448288
-0.3	5.96151	5.51399	0.447521
-0.32	5.69158	5.24492	0.446658
-0.34	5.42164	4.97575	0.44589
-0.36	5.15171	4.70659	0.445123
-0.38	4.88188	4.43752	0.444356
-0.4	4.61195	4.16836	0.443589
-0.42	4.34201	3.89919	0.442822
-0.44	4.09174	3.64978	0.441959
-0.46	3.88663	3.44544	0.441192
-0.48	3.69197	3.25145	0.440521
-0.5	3.49732	3.05756	0.439753
-0.52	3.30275	2.86367	0.439082
-0.54	3.1081	2.66978	0.438315
-0.56	2.91344	2.47589	0.437548
-0.58	2.71888	2.282	0.436877
-0.6	2.52422	2.08811	0.43611
-0.62	2.36744	1.9319	0.435534
-0.64	2.24825	1.81329	0.434959
-0.66	2.12934	1.69477	0.434575
-0.68	2.01044	1.57634	0.434096
-0.7	1.89153	1.45792	0.433616
-0.72	1.77253	1.33949	0.433041
-0.74	1.65363	1.22107	0.432562
-0.76	1.53473	1.10264	0.432082
-0.78	1.41774	0.986041	0.431699
-0.8	1.33556	0.904266	0.431296
-0.82	1.27688	0.84583	0.431047
-0.84	1.21819	0.787385	0.430807
-0.86	1.15951	0.728949	0.430558
-0.88	1.10082	0.670504	0.430318
-0.9	1.04214	0.612059	0.430078
-0.92	0.983452	0.553623	0.429829
-0.94	0.924767	0.495178	0.429589
-0.96	0.869275	0.439916	0.429359
-0.98	0.830574	0.401378	0.429196
-1	0.80034	0.371268	0.429071
-1.02	0.770105	0.341168	0.428937
-1.04	0.739881	0.311059	0.428822
-1.06	0.709647	0.280959	0.428688
-1.08	0.679412	0.250849	0.428563
-1.1	0.649188	0.220749	0.428438
-1.12	0.618953	0.19064	0.428314
-1.14	0.592219	0.164011	0.428208
-1.16	0.573233	0.145111	0.428122
-1.18	0.556932	0.128877	0.428055
-1.2	0.54063	0.112642	0.427988
-1.22	0.524338	0.0964082	0.42793
-1.24	0.508037	0.0801788	0.427858
-1.26	0.491736	0.0639455	0.42779
-1.28	0.475434	0.0477132	0.427721
-1.3	0.459133	0.0314799	0.427653
-1.32	0.446034	0.0184282	0.427606
-1.34	0.437625	0.0100541	0.427571
-1.36	0.430433	0.00289263	0.42754
-1.38	0.423241	-0.00426923	0.42751
-1.4	0.416049	-0.0114311	0.42748
-1.42	0.408858	-0.0185932	0.427451
-1.44	0.401666	-0.0257552	0.427421
-1.46	0.394474	-0.0329163	0.42739
-1.48	0.387292	-0.0400784	0.42737
-1.5	0.382037	-0.0453121	0.427349
-1.52	0.378403	-0.0489262	0.427329
-1.54	0.374874	-0.0524434	0.427317
-1.56	0.371345	-0.0559607	0.427306
-1.58	0.367816	-0.0594789	0.427295
-1.6	0.364288	-0.0629962	0.427284
-1.62	0.360759	-0.0665134	0.427272
-1.64	0.35723	-0.0700307	0.427261
-1.66	0.353711	-0.0735364	0.427247
-1.68	0.351141	-0.0761025	0.427244
-1.7	0.349434	-0.0778007	0.427235
-1.72	0.347737	-0.0794979	0.427235
-1.74	0.34604	-0.0811962	0.427236
-1.76	0.344342	-0.0828934	0.427236
-1.78	0.342645	-0.0845907	0.427236
-1.8	0.340948	-0.0862889	0.427237
-1.82	0.339241	-0.0879862	0.427227
-1.84	0.337611	-0.089624	0.427235
-1.86	0.336585	-0.0906471	0.427232
-1.88	0.335808	-0.0914344	0.427243
-1.9	0.335022	-0.0922226	0.427245
-1.92	0.334245	-0.0930108	0.427256
-1.94	0.333459	-0.093799	0.427258
-1.96	0.332682	-0.0945863	0.427268
-1.98	0.331896	-0.0953745	0.42727
-2	0.331119	-0.0961589	0.427278
-2.02	0.330448	-0.0968397	0.427288
-2.04	0.330045	-0.0972521	0.427297
-2.06	0.329796	-0.0975205	0.427316
-2.08	0.329547	-0.097789	0.427336
-2.1	0.329297	-0.0980575	0.427355
-2.12	0.329038	-0.098326	0.427364
-2.14	0.328789	-0.0985945	0.427384
-2.16	0.32854	-0.098863	0.427403
-2.18	0.32829	-0.0991315	0.427422
-2.2	0.328127	-0.0993137	0.427441
-2.22	0.328175	-0.0993041	0.427479
-2.24	0.32831	-0.0992178	0.427527
-2.26	0.328444	-0.0991219	0.427566
-2.28	0.328578	-0.099026	0.427604
-2.3	0.328712	-0.0989301	0.427642
-2.32	0.328856	-0.0988342	0.42769
-2.34	0.32899	-0.0987479	0.427738
-2.36	0.329125	-0.0986521	0.427777
-2.38	0.329364	-0.0984603	0.427825
-2.4	0.329873	-0.0980288	0.427901
-2.42	0.330467	-0.0975205	0.427988
-2.44	0.331062	-0.0970123	0.428074
-2.46	0.331656	-0.0965137	0.42817
-2.48	0.332251	-0.0960055	0.428256
-2.5	0.332845	-0.0954973	0.428342
-2.52	0.33343	-0.0949919	0.428422
-2.54	0.334025	-0.0944866	0.428511
-2.56	0.334916	-0.0937223	0.428639
-2.58	0.336221	-0.0925966	0.428817
-2.6	0.337525	-0.0914641	0.428989
-2.62	0.338838	-0.0903307	0.429169
-2.64	0.340152	-0.0891982	0.42935
-2.66	0.341456	-0.0880648	0.429521
-2.68	0.34277	-0.0869323	0.429702
-2.7	0.344084	-0.0857999	0.429883
-2.72	0.345464	-0.0846051	0.430069
-2.74	0.347325	-0.0830008	0.430325
-2.76	0.350182	-0.080523	0.430705
-2.78	0.353049	-0.0780452	0.431095
-2.8	0.355916	-0.0755674	0.431484
-2.82	0.358784	-0.0730896	0.431873
-2.84	0.361651	-0.0706118	0.432262
-2.86	0.364518	-0.068134	0.432652
-2.88	0.367385	-0.0656562	0.433041
-2.9	0.370511	-0.0629588	0.43347
-2.92	0.375123	-0.0589659	0.434089
-2.94	0.3808	-0.0540649	0.434865
-2.96	0.386467	-0.049164	0.435631
-2.98	0.392144	-0.044263	0.436407
-3	0.397811	-0.0393621	0.437173
-3.02	0.403488	-0.0344611	0.437949
-3.04	0.409164	-0.0295601	0.438725
-3.06	0.414832	-0.0246582	0.43949
-3.08	0.421477	-0.0189134	0.44039
-3.1	0.430558	-0.0110715	0.441629
-3.12	0.441642	-0.00150366	0.443146
-3.14	0.452718	0.00806429	0.444654
-3.16	0.463803	0.0176323	0.44617
-3.18	0.474878	0.0272003	0.447678
-3.2	0.485963	0.0367682	0.449195
-3.22	0.497038	0.0463362	0.450702
-3.24	0.508123	0.0559041	0.452219
-3.26	0.519918	0.0660858	0.453832
-3.28	0.538281	0.0819479	0.456333
-3.3	0.558351	0.0992945	0.459056
-3.32	0.57843	0.116641	0.461789
-3.34	0.59851	0.133997	0.464512
-3.36	0.618589	0.151344	0.467245
-3.38	0.638668	0.16869	0.469978
-3.4	0.658738	0.186037	0.472701
-3.42	0.678818	0.203384	0.475434
-3.44	0.701937	0.223367	0.47857
-3.46	0.731212	0.248711	0.482501
-3.48	0.763067	0.276308	0.486759
-3.5	0.794932	0.303905	0.491026
-3.52	0.826796	0.331503	0.495293
-3.54	0.858651	0.35911	0.499541
-3.56	0.890515	0.386707	0.503808
-3.58	0.922379	0.414304	0.508075
-3.6	0.954244	0.441901	0.512342
-3.62	0.991123	0.473881	0.517242
-3.64	1.03322	0.510645	0.522574
-3.66	1.07541	0.54741	0.528001
-3.68	1.1176	0.584174	0.533429
-3.7	1.1597	0.620938	0.53876
-3.72	1.20189	0.657712	0.544178
-3.74	1.24408	0.694477	0.549605
-3.76	1.28618	0.731241	0.554937
-3.78	1.32904	0.76861	0.560432
-3.8	1.37478	0.808749	0.566032
-3.82	1.42215	0.8505	0.571651
-3.84	1.46952	0.892251	0.57727
-3.86	1.51699	0.934001	0.582985
-3.88	1.56436	0.975781	0.588575
-3.9	1.61173	1.01749	0.594233
-3.92	1.6591	1.05921	0.59989
-3.94	1.70656	1.10101	0.605548
-3.96	1.75403	1.14292	0.61111
-3.98	1.80312	1.18645	0.616671
-4	1.85279	1.23066	0.622137
-4.02	1.90237	1.27486	0.627507
-4.04	1.95195	1.31907	0.632877
-4.06	2.00162	1.36327	0.638342
-4.08	2.05119	1.40748	0.643712
-4.1	2.10077	1.45159	0.649178
-4.12	2.15034	1.49579	0.654548
-4.14	2.20011	1.54019	0.659918
-4.16	2.25036	1.58536	0.665
-4.18	2.30079	1.63071	0.670082
-4.2	2.35114	1.67607	0.675068
-4.22	2.40158	1.72142	0.680151
-4.24	2.45201	1.76678	0.685233
-4.26	2.50236	1.81214	0.690219
-4.28	2.55279	1.85749	0.695301
-4.3	2.60314	1.90285	0.700288
-4.32	2.65348	1.94849	0.704986
-4.34	2.70401	1.99433	0.709685
-4.36	2.75455	2.04026	0.714288
-4.38	2.80508	2.08619	0.71889
-4.4	2.85562	2.13212	0.723493
-4.42	2.90615	2.17805	0.728096
-4.44	2.95659	2.22399	0.732603
-4.46	3.00712	2.27001	0.73711
-4.48	3.05756	2.31614	0.741425
-4.5	3.1081	2.36245	0.745644
-4.52	3.15863	2.40877	0.749863
-4.54	3.20916	2.45508	0.754082
-4.56	3.2597	2.50149	0.758205
-4.58	3.31023	2.54781	0.762425
-4.6	3.36067	2.59422	0.766452
-4.62	3.41101	2.64063	0.770384
-4.64	3.46136	2.68714	0.774219
-4.66	3.5117	2.73364	0.778055
-4.68	3.56204	2.78015	0.78189
-4.7	3.61238	2.82666	0.785726
-4.72	3.66273	2.87316	0.789562
-4.74	3.71316	2.91996	0.793205
-4.76	3.76341	2.96675	0.796658
-4.78	3.81366	3.01345	0.800205
-4.8	3.86381	3.06025	0.803562
-4.82	3.91405	3.10704	0.807014
-4.84	3.9643	3.15384	0.810466
-4.86	4.01455	3.20053	0.814014
-4.88	4.06479	3.24742	0.81737
-4.9	4.11504	3.29441	0.82063
-4.92	4.1651	3.3414	0.823699
-4.94	4.21515	3.38838	0.826767
-4.96	4.26521	3.43547	0.82974
-4.98	4.31516	3.48245	0.832712
-5	4.36522	3.52944	0.835781
