# Supplementary material for: Hypoxia triggers collective aerotactic migration in Dictyostelium discoideum
Source: eLife. 2021 Aug 20;10:e64731. doi: 10.7554/eLife.64731 (PMC8378850; doi:10.7554/eLife.64731)
Supplement: Figure 2—figure supplement 8—source data 1. [file elife-64731-fig2-figsupp8-data1.xlsx]

## Sheet: Feuil1
0.21	0.004
16.6	54.35
23.3	52.05
14.35	34.3
15.65	35.65
20.35	35.55
24.65	24.05
31.65	36.6
31.55	34.1
6.335	47.8
7.415	47.4
