# Supplementary material for: Hypoxia triggers collective aerotactic migration in Dictyostelium discoideum
Source: eLife. 2021 Aug 20;10:e64731. doi: 10.7554/eLife.64731 (PMC8378850; doi:10.7554/eLife.64731)
Supplement: Figure 2—source data 1. [file elife-64731-fig2-data1.xlsx]

## Sheet: Figure 2B
Position relative to median axis for Gap 1mm (µm)	Experimental O2 (%) Gap1mm	Error bar O2 Gap 1mm	Position relative to median axis for Gap 0.5mm (µm)	Experimental O2 (%) Gap 0.5mm	Error bar O2 Gap 0.5mm	Position relative to median axis for Gap 2mm (µm)	Experimental O2 (%) Gap2mm	Error bar O2 Gap 2mm
-2179.8	0.229894	0.0853427	-2177.5	0.351232	0.0776535	-2189.25	0.229018	0.0871506
-2154.6	0.229837	0.0854391	-2151.5	0.34024	0.0775391	-2164.05	0.236791	0.0877402
-2129.4	0.229774	0.0855122	-2125.5	0.333398	0.0776239	-2138.85	0.242963	0.0882698
-2104.2	0.22945	0.0855851	-2099.5	0.328679	0.0776477	-2113.65	0.260099	0.0893988
-2079	0.230262	0.0857365	-2073.5	0.324203	0.0777016	-2088.45	0.26611	0.0900025
-2053.8	0.233676	0.0863194	-2047.5	0.32029	0.0776912	-2063.25	0.273601	0.0907799
-2028.6	0.23822	0.0865893	-2021.5	0.317043	0.0775579	-2038.05	0.286268	0.0918469
-2003.4	0.244227	0.0871357	-1995.5	0.315662	0.0776516	-2012.85	0.296698	0.0926203
-1978.2	0.252094	0.0878231	-1969.5	0.3145	0.0776966	-1987.65	0.309836	0.09385
-1953	0.260138	0.0884692	-1943.5	0.313231	0.0775302	-1962.45	0.325171	0.0950535
-1927.8	0.27051	0.0893617	-1917.5	0.313701	0.0774094	-1937.25	0.340109	0.0963273
-1902.6	0.294051	0.0903611	-1891.5	0.316396	0.0773119	-1912.05	0.358456	0.0977913
-1877.4	0.333514	0.0921486	-1865.5	0.320241	0.0775597	-1886.85	0.376884	0.0992959
-1852.2	0.31976	0.09229	-1839.5	0.324546	0.0776877	-1861.65	0.406885	0.101229
-1827	0.315417	0.092785	-1813.5	0.327449	0.0774317	-1836.45	0.446129	0.103389
-1801.8	0.329084	0.0940056	-1787.5	0.333326	0.077455	-1811.25	0.451552	0.104771
-1776.6	0.344212	0.0952408	-1761.5	0.340437	0.0775632	-1786.05	0.499688	0.107244
-1751.4	0.355908	0.0961066	-1735.5	0.347978	0.0775647	-1760.85	0.556903	0.113041
-1726.2	0.371291	0.0972355	-1709.5	0.3566	0.0773979	-1735.65	0.564135	0.119116
-1701	0.389238	0.0983333	-1683.5	0.366803	0.0773826	-1710.45	0.557302	0.12483
-1675.8	0.409335	0.0997004	-1657.5	0.378777	0.0774099	-1685.25	0.576022	0.130821
-1650.6	0.427975	0.100803	-1631.5	0.390871	0.0773796	-1660.05	0.6015	0.136666
-1625.4	0.46341	0.102243	-1605.5	0.403509	0.0772193	-1634.85	0.634183	0.143036
-1600.2	0.528775	0.104639	-1579.5	0.417239	0.0769694	-1609.65	0.670166	0.14939
-1575	0.542927	0.105889	-1553.5	0.43497	0.0772089	-1584.45	0.706419	0.15554
-1549.8	0.534174	0.108196	-1527.5	0.451235	0.0769912	-1559.25	0.747833	0.161329
-1524.6	0.555577	0.113449	-1501.5	0.469451	0.0768077	-1534.05	0.797588	0.167502
-1499.4	0.58611	0.118983	-1475.5	0.490404	0.0777215	-1508.85	0.837605	0.175501
-1474.2	0.654249	0.125444	-1449.5	0.511969	0.0810662	-1483.65	0.877411	0.18429
-1449	0.760609	0.132214	-1423.5	0.530561	0.0841927	-1458.45	0.928941	0.194115
-1423.8	0.767483	0.138142	-1397.5	0.55071	0.08719	-1433.25	0.984384	0.20399
-1398.6	0.732563	0.144335	-1371.5	0.575574	0.0902383	-1408.05	1.03664	0.214143
-1373.4	0.755787	0.15157	-1345.5	0.603195	0.0935098	-1382.85	1.0939	0.224835
-1348.2	0.799653	0.159732	-1319.5	0.643618	0.0971282	-1357.65	1.16039	0.236257
-1323	0.843769	0.16829	-1293.5	0.70226	0.101069	-1332.45	1.22479	0.24853
-1297.8	0.891245	0.177466	-1267.5	0.759486	0.105224	-1307.25	1.29248	0.261785
-1272.6	0.946569	0.187238	-1241.5	0.783567	0.109336	-1282.05	1.36189	0.275411
-1247.4	0.994509	0.197491	-1215.5	0.794955	0.113886	-1256.85	1.45141	0.288822
-1222.2	1.05717	0.207962	-1189.5	0.815018	0.118934	-1231.65	1.54227	0.304407
-1197	1.1132	0.219147	-1163.5	0.858492	0.124664	-1206.45	1.63754	0.320299
-1171.8	1.17911	0.230625	-1137.5	0.905775	0.130685	-1181.25	1.70329	0.336304
-1146.6	1.24337	0.242836	-1111.5	0.948853	0.137025	-1156.05	1.78176	0.352718
-1121.4	1.31011	0.255537	-1085.5	0.996165	0.143808	-1130.85	1.88003	0.370331
-1096.2	1.38303	0.268505	-1059.5	1.04869	0.15105	-1105.65	1.97478	0.388434
-1071	1.45679	0.282021	-1033.5	1.10521	0.158857	-1080.45	2.07989	0.40804
-1045.8	1.53693	0.29679	-1007.5	1.16925	0.167138	-1055.25	2.19243	0.427971
-1020.6	1.62437	0.311328	-981.5	1.23397	0.175954	-1030.05	2.30627	0.448061
-995.4	1.7052	0.326584	-955.5	1.3033	0.185281	-1004.85	2.43437	0.469591
-970.2	1.79611	0.342522	-929.5	1.37546	0.195058	-979.65	2.55511	0.493196
-945	1.89017	0.359532	-903.5	1.45023	0.205269	-954.45	2.73487	0.513373
-919.8	1.99481	0.377209	-877.5	1.53117	0.216023	-929.25	3.01423	0.529844
-894.6	2.09991	0.39498	-851.5	1.61709	0.22743	-904.05	3.26547	0.558099
-869.4	2.212	0.413972	-825.5	1.73194	0.238731	-878.85	3.4352	0.600327
-844.2	2.32562	0.433409	-799.5	1.89409	0.249538	-853.65	3.53983	0.651394
-819	2.44407	0.453881	-773.5	2.06324	0.260449	-828.45	3.74878	0.692611
-793.8	2.57944	0.474853	-747.5	2.17963	0.273488	-803.25	3.98876	0.730511
-768.6	2.70993	0.496495	-721.5	2.22565	0.288778	-778.05	4.23235	0.761313
-743.4	2.86219	0.516434	-695.5	2.27444	0.304914	-752.85	4.44622	0.790472
-718.2	2.96794	0.539928	-669.5	2.35014	0.320702	-727.65	4.68686	0.818459
-693	3.11567	0.567164	-643.5	2.47677	0.335994	-702.45	4.90946	0.843919
-667.8	3.28223	0.591776	-617.5	2.60275	0.351613	-677.25	5.14138	0.875495
-642.6	3.4327	0.615977	-591.5	2.74216	0.367882	-652.05	5.36531	0.903018
-617.4	3.57793	0.640982	-565.5	2.88181	0.385256	-626.85	5.59028	0.931705
-592.2	3.76815	0.671323	-539.5	3.03284	0.403777	-601.65	5.83096	0.957481
-567	3.97207	0.705733	-513.5	3.18576	0.42262	-576.45	6.05665	0.983285
-541.8	4.24741	0.746614	-487.5	3.33416	0.442227	-551.25	6.31178	1.00706
-516.6	4.61482	0.788703	-461.5	3.49715	0.462091	-526.05	6.57447	1.02898
-491.4	4.97631	0.830543	-435.5	3.67584	0.482237	-500.85	6.80473	1.05217
-466.2	5.29875	0.867904	-409.5	3.87157	0.502719	-475.65	7.06953	1.07255
-441	5.62347	0.902219	-383.5	4.05865	0.524437	-450.45	7.31968	1.0938
-415.8	5.94441	0.930802	-357.5	4.24757	0.547066	-425.25	7.55739	1.11245
-390.6	6.25866	0.957949	-331.5	4.45949	0.569453	-400.05	7.84265	1.13312
-365.4	6.53928	0.985496	-305.5	4.68996	0.591997	-374.85	8.07595	1.15358
-340.2	6.83967	1.00948	-279.5	4.91813	0.61566	-349.65	8.36403	1.16697
-315	7.10287	1.03525	-253.5	5.13285	0.641171	-324.45	8.66737	1.15212
-289.8	7.35849	1.06363	-227.5	5.39291	0.664914	-299.25	9.0881	1.1259
-264.6	7.67724	1.08428	-201.5	5.65895	0.68827	-274.05	9.38347	1.16445
-239.4	7.95419	1.10626	-175.5	6.00677	0.714584	-248.85	9.5242	1.20906
-214.2	8.23078	1.12832	-149.5	6.3074	0.74773	-223.65	9.72851	1.22604
-189	8.48994	1.15913	-123.5	6.69993	0.784445	-198.45	10.0071	1.22911
-163.8	8.8663	1.17571	-97.5	7.05784	0.82108	-173.25	10.2616	1.24052
-138.6	9.24952	1.18382	-71.5	7.49759	0.84878	-148.05	10.538	1.24484
-113.4	9.60244	1.19239	-45.5	7.93447	0.870882	-122.85	10.7663	1.25626
-88.2	10.0026	1.18993	-19.5	8.36956	0.890485	-97.65	11.0736	1.25264
-63	10.3821	1.18108	6.5	8.81699	0.904867	-72.45	11.5033	1.22228
-37.8	10.7695	1.1661	32.5	9.19542	0.922038	-47.25	11.9189	1.19416
-12.6	11.1268	1.14898	58.5	9.58294	0.934182	-22.05	12.2757	1.17094
12.6	11.4673	1.14106	84.5	9.96763	0.942664	3.15	12.6633	1.13112
37.8	11.7216	1.13904	110.5	10.3075	0.954445	28.35	13.0596	1.08875
63	12.0731	1.12326	136.5	10.6679	0.961336	53.55	13.4111	1.04473
88.2	12.3719	1.10831	162.5	11.0909	0.960283	78.75	13.6929	1.02665
113.4	12.6931	1.08797	188.5	11.4782	0.958418	103.95	13.9695	1.00432
138.6	12.9835	1.06736	214.5	11.8328	0.960461	129.15	14.1709	0.981835
163.8	13.5434	0.962323	240.5	12.2601	0.949323	154.35	14.4135	0.959053
189	14.3559	0.766476	266.5	12.6108	0.926716	179.55	14.619	0.939424
214.2	14.2587	0.856386	292.5	12.7665	0.892541	204.75	14.9871	0.861043
239.4	14.1655	0.980053	318.5	13.0275	0.839889	229.95	15.4154	0.782178
264.6	14.3839	0.975247	344.5	13.373	0.789163	255.15	15.7359	0.767943
289.8	14.6478	0.947987	370.5	13.9111	0.770117	280.35	15.7453	0.801746
315	14.99	0.888352	396.5	14.502	0.79609	305.55	15.9121	0.785152
340.2	15.1197	0.884556	422.5	14.9722	0.831574	330.75	16.0656	0.767589
365.4	15.1067	0.908207	448.5	15.3516	0.870595	355.95	16.256	0.741431
390.6	14.8318	0.939717	474.5	15.6088	0.904222	381.15	16.565	0.69552
415.8	14.6904	0.950693	500.5	15.8163	0.92892	406.35	16.7709	0.666458
441	15.0913	0.908472	526.5	16.066	0.944897	431.55	16.9366	0.642884
466.2	15.9679	0.79571	552.5	16.2904	0.959755	456.75	17.1913	0.603255
491.4	16.3618	0.742954	578.5	16.5822	0.974606	481.95	17.3776	0.57336
516.6	16.6952	0.691389	604.5	16.7226	0.988306	507.15	17.568	0.540657
541.8	16.8738	0.668811	630.5	16.9719	1.00269	532.35	17.7717	0.50389
567	17.0195	0.649231	656.5	17.1449	1.01609	557.55	17.9175	0.472627
592.2	17.2505	0.613282	682.5	17.3553	1.03144	582.75	18.1346	0.430562
617.4	17.4531	0.578614	708.5	17.5141	1.04198	607.95	18.3264	0.390912
642.6	17.543	0.565973	734.5	17.7459	1.05727	633.15	18.477	0.357757
667.8	17.7054	0.539521	760.5	17.8712	1.06437	658.35	18.5889	0.334488
693	17.9206	0.499213	786.5	18.0299	1.07571	683.55	18.8249	0.286326
718.2	18.1448	0.459579	812.5	18.1419	1.08543	708.75	19.0397	0.241893
743.4	18.3669	0.414743	838.5	18.2999	1.09991	733.95	19.2318	0.231437
768.6	18.5269	0.38455	864.5	18.4731	1.10955	759.15	19.3667	0.225125
793.8	18.6074	0.371683	890.5	18.6461	1.11918	784.35	19.5358	0.217185
819	18.6742	0.359884	916.5	18.8155	1.13055	809.55	19.6351	0.212541
844.2	18.8104	0.333236	942.5	18.8637	1.13747	834.75	19.7419	0.207694
869.4	19.0087	0.291183	968.5	18.9675	1.14739	859.95	19.8885	0.200543
894.6	19.0428	0.28757	994.5	19.0947	1.15592	885.15	19.9861	0.195778
919.8	19.157	0.261507	1020.5	19.2276	1.1611	910.35	20.0811	0.190963
945	19.2843	0.237347	1046.5	19.2921	1.1683	935.55	19.9118	0.200223
970.2	19.4448	0.227863	1072.5	19.381	1.1787	960.75	19.716	0.21076
995.4	19.4797	0.222845	1098.5	19.5365	1.18606	985.95	19.5304	0.221192
1020.6	19.6299	0.214	1124.5	19.6121	1.19064	1011.15	19.5441	0.220717
1045.8	19.705	0.213075	1150.5	19.5998	1.19074	1036.35	19.9132	0.200829
1071	19.707	0.215115	1176.5	19.6006	1.18611	1061.55	20.3273	0.177375
1096.2	19.7879	0.209869	1202.5	19.5294	1.16518	1086.75	20.488	0.168195
1121.4	19.9516	0.201064	1228.5	19.4389	1.10686	1111.95	20.5172	0.166645
1146.6	19.9704	0.200742	1254.5	19.6848	1.06138	1137.15	20.5936	0.162241
1171.8	20.0447	0.196481	1280.5	20.0124	1.05522	1162.35	20.4981	0.167789
1197	20.1117	0.191734	1306.5	20.4667	1.11556	1187.55	20.6735	0.157348
1222.2	20.2812	0.180171	1332.5	20.3944	1.17586	1212.75	20.8465	0.162209
1247.4	20.3407	0.1766	1358.5	19.9828	1.18102	1237.95	20.8916	0.174499
1272.6	20.2958	0.180164	1384.5	19.7804	1.13236	1263.15	21.0916	0.228791
1297.8	20.417	0.173692	1410.5	19.9842	1.09844	1288.35	21.1953	0.257259
1323	20.5188	0.167089	1436.5	20.3825	1.11204	1313.55	21.2151	0.263092
1348.2	20.4609	0.170881	1462.5	20.5424	1.16499	1338.75	21.2925	0.284816
1373.4	20.5753	0.164291	1488.5	20.3587	1.18912	1363.95	21.1944	0.256193
1398.6	20.6506	0.159589	1514.5	20.1297	1.16177	1389.15	21.2829	0.276229
1423.8	20.6828	0.157494	1540.5	20.2793	1.14433	1414.35	21.3563	0.29237
1449	20.7564	0.152762	1566.5	20.5748	1.17546	1439.55	21.4166	0.309805
1474.2	20.8135	0.15385	1592.5	20.6541	1.22025	1464.75	21.6821	0.388699
1499.4	20.9513	0.192696	1618.5	20.6678	1.25876	1489.95	21.5466	0.355807
1524.6	21.0449	0.218368	1644.5	20.5287	1.27079	1515.15	21.5128	0.344547
1549.8	21.0094	0.207689	1670.5	20.6248	1.29135	1540.35	21.5632	0.357066
1575	21.0136	0.209076	1696.5	20.5828	1.3041	1565.55	21.5756	0.356425
1600.2	20.9988	0.204925	1722.5	20.613	1.31488	1590.75	21.3983	0.304787
1625.4	20.905	0.178848	1748.5	20.5587	1.31936	1615.95	21.5371	0.338315
1650.6	20.9583	0.193537	1774.5	20.6293	1.32491	1641.15	21.7506	0.396705
1675.8	21.0855	0.228908	1800.5	20.6227	1.3235	1666.35	21.6091	0.360021
1701	21.1373	0.243483	1826.5	20.6486	1.31769	1691.55	21.6473	0.370122
1726.2	21.1042	0.232123	1852.5	20.6691	1.31452	1716.75	21.7837	0.406649
1751.4	21.1332	0.238771	1878.5	20.7841	1.31541	1741.95	21.6205	0.362687
1776.6	21.2173	0.265526	1904.5	20.7989	1.3173	1767.15	21.6661	0.374338
1801.8	21.2317	0.272033	1930.5	20.8406	1.3025	1792.35	21.8346	0.420321
1827	21.2607	0.280409	1956.5	20.8458	1.28812	1817.55	21.6783	0.375412
1852.2	21.184	0.257863	1982.5	21.0049	1.28856	1842.75	21.6936	0.379868
1877.4	21.2468	0.274874	2008.5	21.0067	1.28816	1867.95	21.6527	0.370327
1902.6	21.2381	0.274518	2034.5	20.9897	1.28434	1893.15	21.7995	0.41012
1927.8	21.2464	0.277882	2060.5	20.8656	1.2717	1918.35	21.8116	0.414242
1953	21.2773	0.286631	2086.5	20.9151	1.26386	1943.55	21.6941	0.383203
1978.2	21.2265	0.272077	2112.5	20.8163	1.24546	1968.75	21.6626	0.373889

## Sheet: Figure 2C-E
File of tracked cell position of Fig 2C (dta also used to build Fig 2D-E)
scale 1.634µm/pix
cell centroid X (pix)	cell centroid Y (pix)	time (min)	cell index
1995	1884	1	1
1992,99225000000	1886,55438000000	2	1
1992,10148000000	1885,85547000000	3	1
1990,93239000000	1886,06175000000	4	1
1989,06098000000	1886,93903000000	5	1
1987,87805000000	1887,85366000000	6	1
1983,87926000000	1889,55917000000	7	1
1980,78049000000	1890	8	1
1978,86382000000	1890,74303000000	9	1
1978,66361000000	1890,26576000000	10	1
1978,87688000000	1889,10491000000	11	1
1977,75696000000	1890,27203000000	12	1
1975,93525000000	1891,92161000000	13	1
1975,70642000000	1892,11473000000	14	1
1975,70732000000	1894,30488000000	15	1
1976,79239000000	1890,87399000000	16	1
1977,01506000000	1890,81843000000	17	1
1976,76783000000	1892,16302000000	18	1
1975,40402000000	1893,46026000000	19	1
1976,69802000000	1893,62485000000	20	1
1976,97637000000	1893,43928000000	21	1
1974,92656000000	1892,26912000000	22	1
1973,82594000000	1892,54823000000	23	1
1975,16421000000	1892,02127000000	24	1
1974,85456000000	1890,75670000000	25	1
1975,87805000000	1890,90244000000	26	1
1975,42094000000	1895,14552000000	27	1
1974,72025000000	1895,90009000000	28	1
1975,59225000000	1895,84850000000	29	1
1976,56620000000	1896,96922000000	30	1
1975,67335000000	1896,17161000000	31	1
1975,82755000000	1896,42497000000	32	1
1974,68637000000	1896,73085000000	33	1
1975,37805000000	1896,73171000000	34	1
1975,50142000000	1896,97476000000	35	1
1975,63931000000	1896,93085000000	36	1
1975,38874000000	1898,30526000000	37	1
1976,30049000000	1898,35732000000	38	1
1889	171	1	2
1890,99225000000	166,554380000000	2	2
1893,10148000000	163,855470000000	3	2
1895,93239000000	161,061750000000	4	2
1898,06098000000	158,939030000000	5	2
1899,87805000000	158,853660000000	6	2
1901,87926000000	160,559170000000	7	2
1902,78049000000	160	8	2
1902,86382000000	158,743030000000	9	2
1903,66361000000	158,265760000000	10	2
1903,87688000000	157,104910000000	11	2
1904,75696000000	158,272030000000	12	2
1906,93525000000	157,921610000000	13	2
1909,70642000000	157,114730000000	14	2
1910,70732000000	159,304880000000	15	2
1911,79239000000	158,873990000000	16	2
1913,01506000000	157,818430000000	17	2
1914,76783000000	159,163020000000	18	2
1916,40402000000	159,460260000000	19	2
1920,69802000000	159,624850000000	20	2
1920,97637000000	158,439280000000	21	2
1919,92656000000	157,269120000000	22	2
1920,82594000000	157,548230000000	23	2
1921,16421000000	157,021270000000	24	2
1921,85456000000	156,756700000000	25	2
1920,87805000000	156,902440000000	26	2
1920,42094000000	158,145520000000	27	2
1921,72025000000	156,900090000000	28	2
1921,59225000000	156,848500000000	29	2
1924,56620000000	155,969220000000	30	2
478	1903	1	3
475,992250000000	1904,55438000000	2	3
476,101480000000	1903,85547000000	3	3
475,932390000000	1905,06175000000	4	3
475,060980000000	1903,93903000000	5	3
475,878050000000	1902,85366000000	6	3
473,879260000000	1901,55917000000	7	3
474,780490000000	1902	8	3
472,863820000000	1901,74303000000	9	3
473,663610000000	1902,26576000000	10	3
473,876880000000	1902,10491000000	11	3
472,756960000000	1903,27203000000	12	3
473,935250000000	1902,92161000000	13	3
472,706420000000	1905,11473000000	14	3
472,707320000000	1907,30488000000	15	3
475,792390000000	1907,87399000000	16	3
477,015060000000	1908,81843000000	17	3
478,767830000000	1908,16302000000	18	3
479,404020000000	1910,46026000000	19	3
482,698020000000	1911,62485000000	20	3
483,976370000000	1911,43928000000	21	3
483,926560000000	1911,26912000000	22	3
488,825940000000	1914,54823000000	23	3
490,164210000000	1914,02127000000	24	3
492,854560000000	1915,75670000000	25	3
493,878050000000	1921,90244000000	26	3
492,420940000000	1926,14552000000	27	3
489,720250000000	1929,90009000000	28	3
490,592250000000	1935,84850000000	29	3
498,673350000000	1946,17161000000	31	3
502,827550000000	1947,42497000000	32	3
323	622	1	4
322,992250000000	620,554380000000	2	4
320,101480000000	617,855470000000	3	4
319,932390000000	618,061750000000	4	4
320,060980000000	617,939030000000	5	4
313,878050000000	610,853660000000	6	4
311,879260000000	608,559170000000	7	4
310,780490000000	606	8	4
309,863820000000	603,743030000000	9	4
309,663610000000	600,265760000000	10	4
310,876880000000	595,104910000000	11	4
311,756960000000	594,272030000000	12	4
312,935250000000	598,921610000000	13	4
315,706420000000	603,114730000000	14	4
316,707320000000	605,304880000000	15	4
316,792390000000	609,873990000000	16	4
318,015060000000	611,818430000000	17	4
317,767830000000	615,163020000000	18	4
317,404020000000	618,460260000000	19	4
316,698020000000	620,624850000000	20	4
314,976370000000	620,439280000000	21	4
313,926560000000	616,269120000000	22	4
314,825940000000	614,548230000000	23	4
315,164210000000	615,021270000000	24	4
319,854560000000	616,756700000000	25	4
318,878050000000	615,902440000000	26	4
320,420940000000	615,145520000000	27	4
323,720250000000	613,900090000000	28	4
327,592250000000	610,848500000000	29	4
332,566200000000	606,969220000000	30	4
336,673350000000	603,171610000000	31	4
338,827550000000	599,424970000000	32	4
342,686370000000	592,730850000000	33	4
475	657	1	5
474,992250000000	657,554380000000	2	5
475,101480000000	656,855470000000	3	5
471,932390000000	657,061750000000	4	5
470,060980000000	656,939030000000	5	5
470,878050000000	656,853660000000	6	5
470,879260000000	657,559170000000	7	5
471,780490000000	657	8	5
470,863820000000	656,743030000000	9	5
470,663610000000	658,265760000000	10	5
471,876880000000	656,104910000000	11	5
472,756960000000	652,272030000000	12	5
471,935250000000	651,921610000000	13	5
471,706420000000	649,114730000000	14	5
471,707320000000	649,304880000000	15	5
471,792390000000	648,873990000000	16	5
475,015060000000	649,818430000000	17	5
474,767830000000	650,163020000000	18	5
475,404020000000	650,460260000000	19	5
477,698020000000	651,624850000000	20	5
477,976370000000	650,439280000000	21	5
476,926560000000	649,269120000000	22	5
480,825940000000	646,548230000000	23	5
482,164210000000	646,021270000000	24	5
482,854560000000	647,756700000000	25	5
483,878050000000	646,902440000000	26	5
488,420940000000	646,145520000000	27	5
490,720250000000	647,900090000000	28	5
497,592250000000	649,848500000000	29	5
504,566200000000	652,969220000000	30	5
510,673350000000	653,171610000000	31	5
513,827550000000	654,424970000000	32	5
629	475	1	6
628,992250000000	475,554380000000	2	6
630,101480000000	475,855470000000	3	6
630,932390000000	477,061750000000	4	6
633,060980000000	478,939030000000	5	6
633,878050000000	479,853660000000	6	6
635,879260000000	483,559170000000	7	6
635,780490000000	484	8	6
634,863820000000	490,743030000000	9	6
633,663610000000	494,265760000000	10	6
632,876880000000	496,104910000000	11	6
630,756960000000	498,272030000000	12	6
628,935250000000	501,921610000000	13	6
623,706420000000	503,114730000000	14	6
621,707320000000	504,304880000000	15	6
622,792390000000	503,873990000000	16	6
624,015060000000	501,818430000000	17	6
623,767830000000	503,163020000000	18	6
618,404020000000	502,460260000000	19	6
617,698020000000	500,624850000000	20	6
617,976370000000	498,439280000000	21	6
618,926560000000	492,269120000000	22	6
622,825940000000	491,548230000000	23	6
627,164210000000	483,021270000000	24	6
629,854560000000	478,756700000000	25	6
629,878050000000	474,902440000000	26	6
630,420940000000	470,145520000000	27	6
630,720250000000	464,900090000000	28	6
630,592250000000	458,848500000000	29	6
628,566200000000	452,969220000000	30	6
625,673350000000	447,171610000000	31	6
623,827550000000	441,424970000000	32	6
622,686370000000	438,730850000000	33	6
621,378050000000	432,731710000000	34	6
621,501420000000	428,974760000000	35	6
619,639310000000	420,930850000000	36	6
619,388740000000	415,305260000000	37	6
651	367	1	7
649,992250000000	367,554380000000	2	7
649,101480000000	365,855470000000	3	7
647,932390000000	365,061750000000	4	7
645,060980000000	362,939030000000	5	7
644,878050000000	361,853660000000	6	7
644,879260000000	362,559170000000	7	7
644,780490000000	361	8	7
643,863820000000	358,743030000000	9	7
642,663610000000	358,265760000000	10	7
642,876880000000	356,104910000000	11	7
643,756960000000	355,272030000000	12	7
642,935250000000	355,921610000000	13	7
642,706420000000	355,114730000000	14	7
642,707320000000	355,304880000000	15	7
642,792390000000	354,873990000000	16	7
642,015060000000	354,818430000000	17	7
643,404020000000	355,460260000000	19	7
644,698020000000	354,624850000000	20	7
647,976370000000	354,439280000000	21	7
649,926560000000	353,269120000000	22	7
651,825940000000	351,548230000000	23	7
649,164210000000	356,021270000000	24	7
648,854560000000	357,756700000000	25	7
654,878050000000	350,902440000000	26	7
658,420940000000	346,145520000000	27	7
662,720250000000	342,900090000000	28	7
668,592250000000	340,848500000000	29	7
669,566200000000	341,969220000000	30	7
669,673350000000	340,171610000000	31	7
674,827550000000	336,424970000000	32	7
678,686370000000	331,730850000000	33	7
682,378050000000	326,731710000000	34	7
688,501420000000	323,974760000000	35	7
692,639310000000	319,930850000000	36	7
694,388740000000	320,305260000000	37	7
701,300490000000	321,357320000000	38	7
2358	1822	1	8
2356,99225000000	1824,55438000000	2	8
2355,10148000000	1828,85547000000	3	8
2354,93239000000	1830,06175000000	4	8
2355,06098000000	1831,93903000000	5	8
2356,87805000000	1831,85366000000	6	8
2356,87926000000	1833,55917000000	7	8
2358,78049000000	1836	8	8
2357,86382000000	1835,74303000000	9	8
2358,66361000000	1839,26576000000	10	8
2360,87688000000	1840,10491000000	11	8
2365,75696000000	1840,27203000000	12	8
2365,93525000000	1838,92161000000	13	8
2364,70642000000	1837,11473000000	14	8
2362,70732000000	1838,30488000000	15	8
2361,79239000000	1837,87399000000	16	8
2363,01506000000	1837,81843000000	17	8
2363,76783000000	1838,16302000000	18	8
2368,40402000000	1842,46026000000	19	8
2373,69802000000	1845,62485000000	20	8
2374,97637000000	1844,43928000000	21	8
2375,92656000000	1844,26912000000	22	8
2374,82594000000	1843,54823000000	23	8
2375,85456000000	1842,75670000000	25	8
2374,87805000000	1842,90244000000	26	8
2374,42094000000	1844,14552000000	27	8
2374,72025000000	1843,90009000000	28	8
2375,56620000000	1843,96922000000	30	8
2375,67335000000	1843,17161000000	31	8
2375,82755000000	1846,42497000000	32	8
2373,68637000000	1846,73085000000	33	8
2375,37805000000	1849,73171000000	34	8
2378,50142000000	1853,97476000000	35	8
472	1764	1	9
471,992250000000	1764,55438000000	2	9
472,101480000000	1763,85547000000	3	9
473,932390000000	1765,06175000000	4	9
475,060980000000	1764,93903000000	5	9
473,878050000000	1763,85366000000	6	9
473,879260000000	1764,55917000000	7	9
473,780490000000	1764	8	9
474,863820000000	1763,74303000000	9	9
474,663610000000	1765,26576000000	10	9
475,876880000000	1764,10491000000	11	9
478,756960000000	1763,27203000000	12	9
479,935250000000	1762,92161000000	13	9
480,706420000000	1763,11473000000	14	9
479,707320000000	1758,30488000000	15	9
478,792390000000	1757,87399000000	16	9
480,015060000000	1752,81843000000	17	9
479,767830000000	1751,16302000000	18	9
479,404020000000	1751,46026000000	19	9
481,698020000000	1749,62485000000	20	9
481,976370000000	1744,43928000000	21	9
482,926560000000	1741,26912000000	22	9
481,825940000000	1741,54823000000	23	9
478,164210000000	1738,02127000000	24	9
478,854560000000	1736,75670000000	25	9
478,878050000000	1736,90244000000	26	9
477,420940000000	1736,14552000000	27	9
476,720250000000	1733,90009000000	28	9
474,592250000000	1728,84850000000	29	9
474,566200000000	1724,96922000000	30	9
473,673350000000	1722,17161000000	31	9
472,827550000000	1720,42497000000	32	9
470,686370000000	1714,73085000000	33	9
468,378050000000	1708,73171000000	34	9
783	1576	1	10
782,992250000000	1576,55438000000	2	10
782,101480000000	1575,85547000000	3	10
782,932390000000	1576,06175000000	4	10
783,060980000000	1574,93903000000	5	10
782,878050000000	1574,85366000000	6	10
782,879260000000	1575,55917000000	7	10
782,780490000000	1575	8	10
782,863820000000	1575,74303000000	9	10
783,663610000000	1576,26576000000	10	10
782,876880000000	1575,10491000000	11	10
783,756960000000	1575,27203000000	12	10
783,935250000000	1575,92161000000	13	10
783,706420000000	1576,11473000000	14	10
784,707320000000	1577,30488000000	15	10
785,792390000000	1576,87399000000	16	10
786,015060000000	1576,81843000000	17	10
786,767830000000	1578,16302000000	18	10
788,404020000000	1579,46026000000	19	10
790,698020000000	1581,62485000000	20	10
790,976370000000	1581,43928000000	21	10
792,926560000000	1578,26912000000	22	10
796,825940000000	1580,54823000000	23	10
794,854560000000	1578,75670000000	25	10
795,878050000000	1574,90244000000	26	10
793,420940000000	1577,14552000000	27	10
792,720250000000	1577,90009000000	28	10
791,592250000000	1576,84850000000	29	10
791,566200000000	1581,96922000000	30	10
793,673350000000	1582,17161000000	31	10
788,686370000000	1578,73085000000	33	10
787,378050000000	1574,73171000000	34	10
2112	539	1	11
2113,99225000000	538,554380000000	2	11
2115,10148000000	535,855470000000	3	11
2114,93239000000	535,061750000000	4	11
2115,06098000000	534,939030000000	5	11
2114,87805000000	533,853660000000	6	11
2114,87926000000	532,559170000000	7	11
2114,78049000000	533	8	11
2114,86382000000	532,743030000000	9	11
2115,66361000000	533,265760000000	10	11
2115,87688000000	533,104910000000	11	11
2115,75696000000	533,272030000000	12	11
2114,93525000000	532,921610000000	13	11
2113,70642000000	533,114730000000	14	11
2113,70732000000	534,304880000000	15	11
2114,79239000000	532,873990000000	16	11
2115,01506000000	532,818430000000	17	11
2114,76783000000	534,163020000000	18	11
2114,40402000000	534,460260000000	19	11
2115,69802000000	535,624850000000	20	11
2115,97637000000	534,439280000000	21	11
2114,92656000000	532,269120000000	22	11
2114,82594000000	532,548230000000	23	11
2114,16421000000	533,021270000000	24	11
2113,85456000000	532,756700000000	25	11
2113,87805000000	533,902440000000	26	11
2113,42094000000	535,145520000000	27	11
2112,72025000000	535,900090000000	28	11
2111,59225000000	535,848500000000	29	11
2110,56620000000	536,969220000000	30	11
2109,67335000000	537,171610000000	31	11
2106,82755000000	539,424970000000	32	11
2103,68637000000	537,730850000000	33	11
2100,37805000000	535,731710000000	34	11
2100,50142000000	531,974760000000	35	11
2100,63931000000	528,930850000000	36	11
2103,38874000000	525,305260000000	37	11
2106,30049000000	524,357320000000	38	11
2458	1468	1	12
2457,99225000000	1468,55438000000	2	12
2456,10148000000	1467,85547000000	3	12
2455,93239000000	1468,06175000000	4	12
2455,06098000000	1467,93903000000	5	12
2454,87805000000	1468,85366000000	6	12
2454,87926000000	1469,55917000000	7	12
2454,78049000000	1469	8	12
2454,86382000000	1468,74303000000	9	12
2454,66361000000	1469,26576000000	10	12
2452,87688000000	1469,10491000000	11	12
2452,75696000000	1469,27203000000	12	12
2452,93525000000	1469,92161000000	13	12
2449,70642000000	1469,11473000000	14	12
2448,70732000000	1470,30488000000	15	12
2447,79239000000	1468,87399000000	16	12
2447,01506000000	1467,81843000000	17	12
2444,76783000000	1469,16302000000	18	12
2442,40402000000	1469,46026000000	19	12
2441,69802000000	1471,62485000000	20	12
2440,97637000000	1470,43928000000	21	12
2439,92656000000	1468,26912000000	22	12
2438,82594000000	1468,54823000000	23	12
2439,16421000000	1469,02127000000	24	12
2437,85456000000	1470,75670000000	25	12
2437,87805000000	1470,90244000000	26	12
2438,42094000000	1471,14552000000	27	12
2436,72025000000	1472,90009000000	28	12
2435,59225000000	1472,84850000000	29	12
2434,56620000000	1471,96922000000	30	12
2432,67335000000	1472,17161000000	31	12
2432,82755000000	1471,42497000000	32	12
2430,68637000000	1472,73085000000	33	12
2428,37805000000	1474,73171000000	34	12
2428,50142000000	1478,97476000000	35	12
2427,63931000000	1479,93085000000	36	12
1965	535	1	13
1963,99225000000	538,554380000000	2	13
1964,10148000000	539,855470000000	3	13
1960,93239000000	542,061750000000	4	13
1959,06098000000	540,939030000000	5	13
1956,87805000000	542,853660000000	6	13
1955,87926000000	544,559170000000	7	13
1954,78049000000	547	8	13
1953,86382000000	548,743030000000	9	13
1954,66361000000	549,265760000000	10	13
1953,87688000000	546,104910000000	11	13
1952,75696000000	546,272030000000	12	13
1953,93525000000	548,921610000000	13	13
1953,70642000000	549,114730000000	14	13
1950,70732000000	551,304880000000	15	13
1948,79239000000	550,873990000000	16	13
1946,01506000000	548,818430000000	17	13
1942,76783000000	548,163020000000	18	13
1941,40402000000	548,460260000000	19	13
1942,69802000000	546,624850000000	20	13
1944,97637000000	542,439280000000	21	13
1943,92656000000	540,269120000000	22	13
1944,82594000000	539,548230000000	23	13
1945,16421000000	539,021270000000	24	13
1945,85456000000	539,756700000000	25	13
1950,87805000000	541,902440000000	26	13
1950,42094000000	543,145520000000	27	13
1950,72025000000	544,900090000000	28	13
1949,56620000000	546,969220000000	30	13
1949,67335000000	546,171610000000	31	13
1949,82755000000	546,424970000000	32	13
1950,68637000000	545,730850000000	33	13
2507	1582	1	14
2507,99225000000	1580,55438000000	2	14
2509,10148000000	1579,85547000000	3	14
2508,93239000000	1581,06175000000	4	14
2511,06098000000	1578,93903000000	5	14
2512,87805000000	1577,85366000000	6	14
2512,87926000000	1577,55917000000	7	14
2511,78049000000	1577	8	14
2510,86382000000	1577,74303000000	9	14
2510,66361000000	1578,26576000000	10	14
2510,87688000000	1577,10491000000	11	14
2510,75696000000	1577,27203000000	12	14
2510,93525000000	1576,92161000000	13	14
2509,70642000000	1577,11473000000	14	14
2509,70732000000	1578,30488000000	15	14
2510,79239000000	1576,87399000000	16	14
2511,01506000000	1575,81843000000	17	14
2510,76783000000	1577,16302000000	18	14
2510,40402000000	1577,46026000000	19	14
2511,69802000000	1576,62485000000	20	14
2511,97637000000	1575,43928000000	21	14
2510,92656000000	1572,26912000000	22	14
2511,82594000000	1572,54823000000	23	14
2512,16421000000	1571,02127000000	24	14
2509,85456000000	1568,75670000000	25	14
2509,87805000000	1565,90244000000	26	14
2506,42094000000	1564,14552000000	27	14
2503,72025000000	1565,90009000000	28	14
2500,59225000000	1563,84850000000	29	14
2501,56620000000	1564,96922000000	30	14
2501,67335000000	1565,17161000000	31	14
2501,82755000000	1565,42497000000	32	14
2501,68637000000	1565,73085000000	33	14
2504,37805000000	1565,73171000000	34	14
2505,50142000000	1564,97476000000	35	14
2504,63931000000	1564,93085000000	36	14
2505,38874000000	1566,30526000000	37	14
2507,30049000000	1568,35732000000	38	14
2515	562	1	15
2515,99225000000	561,554380000000	2	15
2518,10148000000	559,855470000000	3	15
2520,93239000000	558,061750000000	4	15
2523,06098000000	555,939030000000	5	15
2524,87805000000	553,853660000000	6	15
2524,87926000000	553,559170000000	7	15
2524,78049000000	551	8	15
2524,86382000000	548,743030000000	9	15
2524,66361000000	546,265760000000	10	15
2525,87688000000	544,104910000000	11	15
2526,75696000000	541,272030000000	12	15
2526,93525000000	540,921610000000	13	15
2529,70642000000	543,114730000000	14	15
2530,70732000000	543,304880000000	15	15
2534,79239000000	542,873990000000	16	15
2536,01506000000	541,818430000000	17	15
2537,76783000000	541,163020000000	18	15
2538,40402000000	539,460260000000	19	15
2539,69802000000	540,624850000000	20	15
2539,97637000000	539,439280000000	21	15
2537,92656000000	538,269120000000	22	15
2538,82594000000	538,548230000000	23	15
2539,16421000000	538,021270000000	24	15
2538,85456000000	538,756700000000	25	15
2538,87805000000	539,902440000000	26	15
2538,42094000000	540,145520000000	27	15
2536,72025000000	542,900090000000	28	15
2536,59225000000	544,848500000000	29	15
2536,56620000000	545,969220000000	30	15
2536,67335000000	547,171610000000	31	15
2536,82755000000	548,424970000000	32	15
2535,68637000000	549,730850000000	33	15
2533,37805000000	551,731710000000	34	15
2528,50142000000	552,974760000000	35	15
2523,63931000000	554,930850000000	36	15
2520,38874000000	555,305260000000	37	15
1825	442	1	16
1825,99225000000	440,554380000000	2	16
1827,10148000000	437,855470000000	3	16
1827,93239000000	436,061750000000	4	16
1830,06098000000	434,939030000000	5	16
1830,87805000000	435,853660000000	6	16
1832,87926000000	436,559170000000	7	16
1835,78049000000	436	8	16
1836,86382000000	436,743030000000	9	16
1838,66361000000	438,265760000000	10	16
1839,87688000000	439,104910000000	11	16
1840,75696000000	440,272030000000	12	16
1841,93525000000	441,921610000000	13	16
1843,70642000000	443,114730000000	14	16
1843,70732000000	443,304880000000	15	16
1844,79239000000	442,873990000000	16	16
1847,01506000000	441,818430000000	17	16
1849,76783000000	441,163020000000	18	16
1851,40402000000	440,460260000000	19	16
1853,69802000000	441,624850000000	20	16
1857,97637000000	442,439280000000	21	16
1856,92656000000	440,269120000000	22	16
1858,82594000000	437,548230000000	23	16
1862,16421000000	437,021270000000	24	16
1864,85456000000	438,756700000000	25	16
1866,87805000000	438,902440000000	26	16
1868,42094000000	439,145520000000	27	16
1867,72025000000	439,900090000000	28	16
1866,59225000000	443,848500000000	29	16
1866,56620000000	446,969220000000	30	16
1865,67335000000	448,171610000000	31	16
1866,82755000000	453,424970000000	32	16
1965	1533	1	17
1961,99225000000	1531,55438000000	2	17
1959,10148000000	1528,85547000000	3	17
1957,93239000000	1529,06175000000	4	17
1953,06098000000	1524,93903000000	5	17
1950,87805000000	1523,85366000000	6	17
1950,87926000000	1524,55917000000	7	17
1948,78049000000	1521	8	17
1946,86382000000	1522,74303000000	9	17
1944,66361000000	1521,26576000000	10	17
1943,87688000000	1519,10491000000	11	17
1943,75696000000	1518,27203000000	12	17
1942,93525000000	1517,92161000000	13	17
1942,70642000000	1518,11473000000	14	17
1942,70732000000	1519,30488000000	15	17
1942,79239000000	1518,87399000000	16	17
1943,01506000000	1517,81843000000	17	17
1942,76783000000	1519,16302000000	18	17
1942,40402000000	1521,46026000000	19	17
1943,69802000000	1525,62485000000	20	17
1942,97637000000	1528,43928000000	21	17
1940,92656000000	1528,26912000000	22	17
1939,82594000000	1529,54823000000	23	17
1939,16421000000	1530,02127000000	24	17
1938,85456000000	1531,75670000000	25	17
1938,87805000000	1531,90244000000	26	17
1936,42094000000	1534,14552000000	27	17
1935,72025000000	1535,90009000000	28	17
1935,56620000000	1535,96922000000	30	17
1934,67335000000	1537,17161000000	31	17
1932,82755000000	1538,42497000000	32	17
189	1416	1	18
188,992250000000	1416,55438000000	2	18
188,101480000000	1415,85547000000	3	18
186,932390000000	1418,06175000000	4	18
184,060980000000	1420,93903000000	5	18
183,878050000000	1421,85366000000	6	18
182,879260000000	1421,55917000000	7	18
182,780490000000	1420	8	18
178,863820000000	1426,74303000000	9	18
181,663610000000	1431,26576000000	10	18
185,876880000000	1433,10491000000	11	18
187,756960000000	1434,27203000000	12	18
189,935250000000	1437,92161000000	13	18
188,706420000000	1440,11473000000	14	18
186,707320000000	1444,30488000000	15	18
183,792390000000	1444,87399000000	16	18
181,015060000000	1442,81843000000	17	18
177,767830000000	1445,16302000000	18	18
173,404020000000	1447,46026000000	19	18
173,698020000000	1448,62485000000	20	18
171,976370000000	1447,43928000000	21	18
169,926560000000	1444,26912000000	22	18
169,825940000000	1443,54823000000	23	18
168,164210000000	1441,02127000000	24	18
170,854560000000	1439,75670000000	25	18
170,878050000000	1439,90244000000	26	18
171,420940000000	1441,14552000000	27	18
171,720250000000	1440,90009000000	28	18
172,592250000000	1440,84850000000	29	18
171,566200000000	1440,96922000000	30	18
172,673350000000	1440,17161000000	31	18
171,827550000000	1440,42497000000	32	18
171,686370000000	1440,73085000000	33	18
171,378050000000	1440,73171000000	34	18
170,501420000000	1439,97476000000	35	18
305	257	1	19
304,992250000000	254,554380000000	2	19
306,101480000000	250,855470000000	3	19
303,932390000000	248,061750000000	4	19
302,060980000000	246,939030000000	5	19
300,878050000000	245,853660000000	6	19
298,879260000000	245,559170000000	7	19
298,780490000000	244	8	19
296,863820000000	244,743030000000	9	19
292,663610000000	243,265760000000	10	19
288,876880000000	238,104910000000	11	19
291,756960000000	241,272030000000	12	19
294,935250000000	243,921610000000	13	19
300,706420000000	242,114730000000	14	19
300,707320000000	241,304880000000	15	19
305,792390000000	235,873990000000	16	19
310,015060000000	231,818430000000	17	19
308,767830000000	228,163020000000	18	19
308,404020000000	227,460260000000	19	19
308,698020000000	226,624850000000	20	19
308,976370000000	224,439280000000	21	19
307,926560000000	222,269120000000	22	19
308,825940000000	218,548230000000	23	19
310,164210000000	212,021270000000	24	19
308,854560000000	208,756700000000	25	19
308,878050000000	202,902440000000	26	19
309,420940000000	198,145520000000	27	19
307,720250000000	194,900090000000	28	19
303,592250000000	189,848500000000	29	19
302,566200000000	185,969220000000	30	19
302,673350000000	181,171610000000	31	19
301,827550000000	179,424970000000	32	19
298,686370000000	176,730850000000	33	19
297,378050000000	172,731710000000	34	19
298,501420000000	170,974760000000	35	19
299,639310000000	163,930850000000	36	19
298,388740000000	160,305260000000	37	19
2223	319	1	20
2222,99225000000	318,554380000000	2	20
2224,10148000000	315,855470000000	3	20
2229,93239000000	314,061750000000	4	20
2232,06098000000	312,939030000000	5	20
2232,87805000000	312,853660000000	6	20
2234,87926000000	312,559170000000	7	20
2236,78049000000	312	8	20
2236,86382000000	310,743030000000	9	20
2237,66361000000	311,265760000000	10	20
2237,87688000000	310,104910000000	11	20
2238,75696000000	310,272030000000	12	20
2238,93525000000	309,921610000000	13	20
2239,70642000000	309,114730000000	14	20
2239,70732000000	309,304880000000	15	20
2240,79239000000	308,873990000000	16	20
2241,01506000000	307,818430000000	17	20
2240,76783000000	309,163020000000	18	20
2240,40402000000	309,460260000000	19	20
2241,69802000000	310,624850000000	20	20
2241,97637000000	310,439280000000	21	20
2240,92656000000	308,269120000000	22	20
2240,82594000000	308,548230000000	23	20
2241,16421000000	308,021270000000	24	20
2240,85456000000	308,756700000000	25	20
2240,87805000000	308,902440000000	26	20
2241,42094000000	309,145520000000	27	20
2240,72025000000	309,900090000000	28	20
2240,59225000000	307,848500000000	29	20
2239,56620000000	307,969220000000	30	20
2238,67335000000	306,171610000000	31	20
2238,82755000000	305,424970000000	32	20
2237,68637000000	305,730850000000	33	20
2236,37805000000	304,731710000000	34	20
2234,50142000000	302,974760000000	35	20
2233,38874000000	299,305260000000	37	20
959	689	1	21
956,992250000000	688,554380000000	2	21
957,101480000000	686,855470000000	3	21
957,932390000000	688,061750000000	4	21
957,060980000000	686,939030000000	5	21
956,878050000000	687,853660000000	6	21
955,879260000000	688,559170000000	7	21
951,780490000000	687	8	21
948,863820000000	688,743030000000	9	21
948,663610000000	689,265760000000	10	21
947,876880000000	688,104910000000	11	21
947,756960000000	688,272030000000	12	21
946,935250000000	689,921610000000	13	21
947,706420000000	689,114730000000	14	21
946,707320000000	690,304880000000	15	21
945,792390000000	690,873990000000	16	21
946,015060000000	690,818430000000	17	21
945,767830000000	692,163020000000	18	21
946,404020000000	692,460260000000	19	21
949,698020000000	693,624850000000	20	21
947,976370000000	692,439280000000	21	21
951,926560000000	692,269120000000	22	21
952,825940000000	692,548230000000	23	21
953,164210000000	693,021270000000	24	21
954,854560000000	695,756700000000	25	21
956,878050000000	695,902440000000	26	21
958,420940000000	697,145520000000	27	21
958,720250000000	696,900090000000	28	21
960,592250000000	696,848500000000	29	21
963,566200000000	697,969220000000	30	21
967,673350000000	698,171610000000	31	21
971,827550000000	698,424970000000	32	21
972,686370000000	698,730850000000	33	21
974,378050000000	697,731710000000	34	21
977,501420000000	695,974760000000	35	21
980,639310000000	697,930850000000	36	21
985,388740000000	701,305260000000	37	21
1358	959	1	22
1356,99225000000	959,554380000000	2	22
1357,10148000000	953,855470000000	3	22
1356,93239000000	953,061750000000	4	22
1356,06098000000	952,939030000000	5	22
1355,87805000000	952,853660000000	6	22
1351,87926000000	954,559170000000	7	22
1350,78049000000	955	8	22
1349,86382000000	958,743030000000	9	22
1351,66361000000	961,265760000000	10	22
1352,87688000000	963,104910000000	11	22
1352,75696000000	964,272030000000	12	22
1352,93525000000	965,921610000000	13	22
1354,70642000000	970,114730000000	14	22
1352,70732000000	974,304880000000	15	22
1353,79239000000	973,873990000000	16	22
1353,01506000000	973,818430000000	17	22
1352,76783000000	975,163020000000	18	22
1352,40402000000	975,460260000000	19	22
1354,69802000000	981,624850000000	20	22
1353,97637000000	977,439280000000	21	22
1356,92656000000	974,269120000000	22	22
1355,82594000000	973,548230000000	23	22
1356,16421000000	974,021270000000	24	22
1363,85456000000	974,756700000000	25	22
1367,87805000000	980,902440000000	26	22
1368,42094000000	984,145520000000	27	22
1363,72025000000	986,900090000000	28	22
1362,59225000000	986,848500000000	29	22
1360,56620000000	988,969220000000	30	22
1358,67335000000	988,171610000000	31	22
1357,82755000000	991,424970000000	32	22
1359,68637000000	998,730850000000	33	22
409	1138	1	23
412,992250000000	1134,55438000000	2	23
413,101480000000	1132,85547000000	3	23
414,932390000000	1132,06175000000	4	23
417,060980000000	1130,93903000000	5	23
417,878050000000	1129,85366000000	6	23
419,879260000000	1130,55917000000	7	23
424,780490000000	1129	8	23
426,863820000000	1128,74303000000	9	23
429,663610000000	1128,26576000000	10	23
432,876880000000	1127,10491000000	11	23
435,756960000000	1125,27203000000	12	23
438,935250000000	1124,92161000000	13	23
439,706420000000	1124,11473000000	14	23
440,707320000000	1124,30488000000	15	23
441,792390000000	1125,87399000000	16	23
442,015060000000	1124,81843000000	17	23
444,767830000000	1128,16302000000	18	23
448,404020000000	1132,46026000000	19	23
455,698020000000	1135,62485000000	20	23
458,976370000000	1132,43928000000	21	23
463,926560000000	1131,26912000000	22	23
469,825940000000	1133,54823000000	23	23
475,164210000000	1132,02127000000	24	23
481,854560000000	1135,75670000000	25	23
487,878050000000	1134,90244000000	26	23
490,420940000000	1135,14552000000	27	23
496,720250000000	1132,90009000000	28	23
499,592250000000	1128,84850000000	29	23
503,566200000000	1126,96922000000	30	23
505,673350000000	1124,17161000000	31	23
510,827550000000	1121,42497000000	32	23
513,686370000000	1116,73085000000	33	23
516,378050000000	1109,73171000000	34	23
521,501420000000	1106,97476000000	35	23
2526	631	1	24
2524,99225000000	629,554380000000	2	24
2523,10148000000	625,855470000000	3	24
2523,93239000000	622,061750000000	4	24
2526,06098000000	618,939030000000	5	24
2524,87805000000	616,853660000000	6	24
2524,87926000000	616,559170000000	7	24
2524,78049000000	614	8	24
2522,86382000000	613,743030000000	9	24
2517,66361000000	614,265760000000	10	24
2513,87688000000	614,104910000000	11	24
2512,75696000000	614,272030000000	12	24
2509,93525000000	614,921610000000	13	24
2509,70642000000	615,114730000000	14	24
2510,70732000000	615,304880000000	15	24
2509,79239000000	614,873990000000	16	24
2507,01506000000	613,818430000000	17	24
2506,76783000000	615,163020000000	18	24
2506,40402000000	616,460260000000	19	24
2507,69802000000	619,624850000000	20	24
2508,97637000000	621,439280000000	21	24
2509,92656000000	622,269120000000	22	24
2509,82594000000	623,548230000000	23	24
2509,16421000000	624,021270000000	24	24
2510,85456000000	623,756700000000	25	24
2514,87805000000	621,902440000000	26	24
2516,42094000000	623,145520000000	27	24
2516,72025000000	624,900090000000	28	24
2516,59225000000	625,848500000000	29	24
2517,56620000000	628,969220000000	30	24
2513,67335000000	632,171610000000	31	24
2510,82755000000	635,424970000000	32	24
2512,68637000000	636,730850000000	33	24
2513,37805000000	637,731710000000	34	24
1345	1224	1	25
1344,99225000000	1222,55438000000	2	25
1345,10148000000	1220,85547000000	3	25
1345,93239000000	1221,06175000000	4	25
1347,06098000000	1219,93903000000	5	25
1347,87805000000	1217,85366000000	6	25
1348,87926000000	1218,55917000000	7	25
1351,78049000000	1220	8	25
1349,86382000000	1222,74303000000	9	25
1349,66361000000	1223,26576000000	10	25
1351,87688000000	1222,10491000000	11	25
1353,75696000000	1222,27203000000	12	25
1355,93525000000	1221,92161000000	13	25
1355,70642000000	1220,11473000000	14	25
1356,70732000000	1220,30488000000	15	25
1359,79239000000	1221,87399000000	16	25
1359,01506000000	1223,81843000000	17	25
1360,76783000000	1225,16302000000	18	25
1361,40402000000	1224,46026000000	19	25
1362,69802000000	1224,62485000000	20	25
1361,97637000000	1224,43928000000	21	25
1361,82594000000	1227,54823000000	23	25
1361,16421000000	1227,02127000000	24	25
1360,85456000000	1228,75670000000	25	25
1360,87805000000	1228,90244000000	26	25
1361,42094000000	1229,14552000000	27	25
1361,72025000000	1228,90009000000	28	25
1362,59225000000	1229,84850000000	29	25
1361,56620000000	1228,96922000000	30	25
1361,67335000000	1229,17161000000	31	25
1361,82755000000	1229,42497000000	32	25
1361,68637000000	1230,73085000000	33	25
1362,37805000000	1230,73171000000	34	25
1363,50142000000	1230,97476000000	35	25
1363,63931000000	1228,93085000000	36	25
2528	1417	1	26
2529,99225000000	1417,55438000000	2	26
2537,10148000000	1413,85547000000	3	26
2538,93239000000	1414,06175000000	4	26
2541,06098000000	1410,93903000000	5	26
2541,87805000000	1410,85366000000	6	26
2543,87926000000	1411,55917000000	7	26
2544,78049000000	1413	8	26
2544,86382000000	1412,74303000000	9	26
2545,66361000000	1413,26576000000	10	26
2544,87688000000	1410,10491000000	11	26
2544,75696000000	1410,27203000000	12	26
2544,93525000000	1412,92161000000	13	26
2545,70642000000	1412,11473000000	14	26
2546,70732000000	1413,30488000000	15	26
2549,79239000000	1411,87399000000	16	26
2551,01506000000	1409,81843000000	17	26
2549,76783000000	1409,16302000000	18	26
2548,40402000000	1408,46026000000	19	26
2549,69802000000	1408,62485000000	20	26
2550,97637000000	1407,43928000000	21	26
2548,92656000000	1405,26912000000	22	26
2549,82594000000	1405,54823000000	23	26
2550,16421000000	1406,02127000000	24	26
2547,85456000000	1407,75670000000	25	26
2547,87805000000	1409,90244000000	26	26
2547,42094000000	1412,14552000000	27	26
2547,72025000000	1413,90009000000	28	26
2548,59225000000	1413,84850000000	29	26
2548,56620000000	1413,96922000000	30	26
2548,67335000000	1413,17161000000	31	26
2550,82755000000	1417,42497000000	32	26
2549,68637000000	1416,73085000000	33	26
2553,37805000000	1420,73171000000	34	26
2552,50142000000	1418,97476000000	35	26
2551,63931000000	1417,93085000000	36	26
2556,38874000000	1422,30526000000	37	26
2558,30049000000	1424,35732000000	38	26
67	1314	1	27
64,9922500000000	1313,55438000000	2	27
63,1014800000000	1312,85547000000	3	27
61,9323900000000	1314,06175000000	4	27
61,0609800000000	1312,93903000000	5	27
60,8780500000000	1313,85366000000	6	27
58,8792600000000	1316,55917000000	7	27
58,7804900000000	1321	8	27
58,8638200000000	1321,74303000000	9	27
61,6636100000000	1320,26576000000	10	27
61,8768800000000	1318,10491000000	11	27
61,7569600000000	1318,27203000000	12	27
61,9352500000000	1319,92161000000	13	27
61,7064200000000	1319,11473000000	14	27
61,7073200000000	1319,30488000000	15	27
62,7923900000000	1317,87399000000	16	27
63,0150600000000	1317,81843000000	17	27
62,7678300000000	1318,16302000000	18	27
62,4040200000000	1318,46026000000	19	27
63,6980200000000	1319,62485000000	20	27
62,9763700000000	1318,43928000000	21	27
61,9265600000000	1317,26912000000	22	27
61,8259400000000	1317,54823000000	23	27
62,1642100000000	1318,02127000000	24	27
61,8545600000000	1318,75670000000	25	27
61,8780500000000	1317,90244000000	26	27
61,4209400000000	1318,14552000000	27	27
60,7202500000000	1317,90009000000	28	27
59,5922500000000	1316,84850000000	29	27
59,5662000000000	1316,96922000000	30	27
59,6733500000000	1314,17161000000	31	27
59,8275500000000	1313,42497000000	32	27
59,6863700000000	1312,73085000000	33	27
58,3780500000000	1311,73171000000	34	27
58,5014200000000	1311,97476000000	35	27
779	1321	1	28
780,992250000000	1318,55438000000	2	28
782,101480000000	1316,85547000000	3	28
784,932390000000	1315,06175000000	4	28
786,060980000000	1313,93903000000	5	28
788,878050000000	1310,85366000000	6	28
791,879260000000	1310,55917000000	7	28
792,780490000000	1310	8	28
794,863820000000	1309,74303000000	9	28
796,663610000000	1309,26576000000	10	28
797,876880000000	1308,10491000000	11	28
799,756960000000	1307,27203000000	12	28
800,935250000000	1306,92161000000	13	28
802,706420000000	1306,11473000000	14	28
805,707320000000	1304,30488000000	15	28
807,792390000000	1304,87399000000	16	28
811,015060000000	1303,81843000000	17	28
810,767830000000	1305,16302000000	18	28
810,404020000000	1305,46026000000	19	28
813,698020000000	1307,62485000000	20	28
812,976370000000	1306,43928000000	21	28
813,926560000000	1305,26912000000	22	28
814,825940000000	1304,54823000000	23	28
817,164210000000	1304,02127000000	24	28
819,854560000000	1305,75670000000	25	28
821,878050000000	1305,90244000000	26	28
823,420940000000	1307,14552000000	27	28
824,720250000000	1306,90009000000	28	28
824,592250000000	1306,84850000000	29	28
825,566200000000	1305,96922000000	30	28
824,673350000000	1306,17161000000	31	28
824,827550000000	1307,42497000000	32	28
824,686370000000	1306,73085000000	33	28
825,378050000000	1308,73171000000	34	28
825,501420000000	1309,97476000000	35	28
694	1916	1	29
693,992250000000	1918,55438000000	2	29
697,101480000000	1921,85547000000	3	29
698,932390000000	1926,06175000000	4	29
700,060980000000	1928,93903000000	5	29
699,878050000000	1929,85366000000	6	29
700,879260000000	1931,55917000000	7	29
699,780490000000	1933	8	29
700,863820000000	1933,74303000000	9	29
702,663610000000	1932,26576000000	10	29
701,876880000000	1933,10491000000	11	29
701,756960000000	1933,27203000000	12	29
700,935250000000	1934,92161000000	13	29
699,706420000000	1934,11473000000	14	29
699,707320000000	1933,30488000000	15	29
698,792390000000	1932,87399000000	16	29
700,015060000000	1934,81843000000	17	29
701,767830000000	1936,16302000000	18	29
704,404020000000	1937,46026000000	19	29
705,698020000000	1939,62485000000	20	29
704,976370000000	1940,43928000000	21	29
704,926560000000	1938,26912000000	22	29
705,825940000000	1938,54823000000	23	29
705,164210000000	1939,02127000000	24	29
704,854560000000	1940,75670000000	25	29
704,878050000000	1941,90244000000	26	29
707,720250000000	1939,90009000000	28	29
706,592250000000	1939,84850000000	29	29
706,566200000000	1939,96922000000	30	29
706,673350000000	1939,17161000000	31	29
707,827550000000	1939,42497000000	32	29
708,686370000000	1940,73085000000	33	29
519	1069	1	30
518,992250000000	1070,55438000000	2	30
518,101480000000	1069,85547000000	3	30
518,932390000000	1072,06175000000	4	30
519,060980000000	1071,93903000000	5	30
516,878050000000	1071,85366000000	6	30
513,879260000000	1071,55917000000	7	30
513,780490000000	1072	8	30
512,863820000000	1073,74303000000	9	30
512,663610000000	1073,26576000000	10	30
513,876880000000	1074,10491000000	11	30
512,756960000000	1076,27203000000	12	30
513,935250000000	1078,92161000000	13	30
513,706420000000	1080,11473000000	14	30
513,707320000000	1083,30488000000	15	30
512,792390000000	1084,87399000000	16	30
512,015060000000	1084,81843000000	17	30
510,767830000000	1085,16302000000	18	30
509,404020000000	1082,46026000000	19	30
510,698020000000	1080,62485000000	20	30
510,976370000000	1080,43928000000	21	30
512,926560000000	1081,26912000000	22	30
513,825940000000	1083,54823000000	23	30
515,164210000000	1084,02127000000	24	30
516,854560000000	1085,75670000000	25	30
521,878050000000	1086,90244000000	26	30
522,420940000000	1088,14552000000	27	30
523,720250000000	1087,90009000000	28	30
523,592250000000	1087,84850000000	29	30
525,566200000000	1088,96922000000	30	30
528,673350000000	1088,17161000000	31	30
895	224	1	31
897,992250000000	226,554380000000	2	31
900,101480000000	223,855470000000	3	31
888,932390000000	222,061750000000	4	31
889,060980000000	221,939030000000	5	31
883,878050000000	219,853660000000	6	31
880,879260000000	218,559170000000	7	31
878,780490000000	216	8	31
871,863820000000	218,743030000000	9	31
866,663610000000	223,265760000000	10	31
864,876880000000	222,104910000000	11	31
861,756960000000	220,272030000000	12	31
859,935250000000	219,921610000000	13	31
858,706420000000	219,114730000000	14	31
857,707320000000	219,304880000000	15	31
854,792390000000	217,873990000000	16	31
851,015060000000	210,818430000000	17	31
849,767830000000	207,163020000000	18	31
846,404020000000	203,460260000000	19	31
842,698020000000	199,624850000000	20	31
833,976370000000	191,439280000000	21	31
832,926560000000	191,269120000000	22	31
827,825940000000	187,548230000000	23	31
823,164210000000	184,021270000000	24	31
819,854560000000	178,756700000000	25	31
818,878050000000	175,902440000000	26	31
818,420940000000	173,145520000000	27	31
818,720250000000	166,900090000000	28	31
820,592250000000	156,848500000000	29	31
823,566200000000	150,969220000000	30	31
2378	1831	1	32
2378,99225000000	1834,55438000000	2	32
2380,10148000000	1837,85547000000	3	32
2379,93239000000	1840,06175000000	4	32
2379,06098000000	1841,93903000000	5	32
2378,87805000000	1842,85366000000	6	32
2377,87926000000	1843,55917000000	7	32
2378,78049000000	1843	8	32
2376,86382000000	1844,74303000000	9	32
2377,66361000000	1845,26576000000	10	32
2378,87688000000	1844,10491000000	11	32
2378,75696000000	1845,27203000000	12	32
2378,93525000000	1845,92161000000	13	32
2378,70642000000	1846,11473000000	14	32
2379,70732000000	1847,30488000000	15	32
2379,79239000000	1845,87399000000	16	32
2379,01506000000	1845,81843000000	17	32
2378,76783000000	1847,16302000000	18	32
2379,40402000000	1849,46026000000	19	32
2380,69802000000	1850,62485000000	20	32
2380,97637000000	1850,43928000000	21	32
2380,92656000000	1850,26912000000	22	32
2379,82594000000	1851,54823000000	23	32
2380,16421000000	1852,02127000000	24	32
2380,85456000000	1851,75670000000	25	32
2380,87805000000	1851,90244000000	26	32
2380,42094000000	1853,14552000000	27	32
2378,72025000000	1853,90009000000	28	32
2377,59225000000	1854,84850000000	29	32
2376,56620000000	1854,96922000000	30	32
2375,67335000000	1854,17161000000	31	32
2376,82755000000	1853,42497000000	32	32
596	1578	1	33
594,992250000000	1575,55438000000	2	33
594,101480000000	1575,85547000000	3	33
593,932390000000	1576,06175000000	4	33
592,060980000000	1575,93903000000	5	33
590,878050000000	1576,85366000000	6	33
590,879260000000	1582,55917000000	7	33
590,780490000000	1585	8	33
590,863820000000	1585,74303000000	9	33
591,663610000000	1587,26576000000	10	33
591,876880000000	1587,10491000000	11	33
593,756960000000	1590,27203000000	12	33
593,935250000000	1593,92161000000	13	33
593,706420000000	1595,11473000000	14	33
593,707320000000	1596,30488000000	15	33
595,792390000000	1598,87399000000	16	33
598,015060000000	1602,81843000000	17	33
598,767830000000	1605,16302000000	18	33
596,404020000000	1609,46026000000	19	33
598,698020000000	1616,62485000000	20	33
599,976370000000	1622,43928000000	21	33
598,926560000000	1622,26912000000	22	33
598,825940000000	1623,54823000000	23	33
599,164210000000	1626,02127000000	24	33
596,854560000000	1630,75670000000	25	33
596,878050000000	1637,90244000000	26	33
596,420940000000	1642,14552000000	27	33
597,720250000000	1644,90009000000	28	33
593,592250000000	1646,84850000000	29	33
590,566200000000	1648,96922000000	30	33
588,673350000000	1650,17161000000	31	33
585,827550000000	1652,42497000000	32	33
584,686370000000	1653,73085000000	33	33
582,378050000000	1653,73171000000	34	33
1130	440	1	34
1127,99225000000	437,554380000000	2	34
1127,10148000000	435,855470000000	3	34
1125,93239000000	436,061750000000	4	34
1125,06098000000	435,939030000000	5	34
1123,87805000000	434,853660000000	6	34
1122,87926000000	434,559170000000	7	34
1121,78049000000	429	8	34
1121,86382000000	427,743030000000	9	34
1121,66361000000	430,265760000000	10	34
1122,87688000000	425,104910000000	11	34
1121,75696000000	427,272030000000	12	34
1120,93525000000	426,921610000000	13	34
1119,70642000000	427,114730000000	14	34
1118,70732000000	426,304880000000	15	34
1118,79239000000	424,873990000000	16	34
1119,01506000000	424,818430000000	17	34
1119,76783000000	426,163020000000	18	34
1119,40402000000	426,460260000000	19	34
1122,69802000000	432,624850000000	20	34
1124,97637000000	436,439280000000	21	34
1124,92656000000	436,269120000000	22	34
1121,82594000000	440,548230000000	23	34
1122,16421000000	441,021270000000	24	34
1121,85456000000	444,756700000000	25	34
1121,87805000000	446,902440000000	26	34
1121,42094000000	448,145520000000	27	34
1119,72025000000	450,900090000000	28	34
1116,59225000000	452,848500000000	29	34
1113,56620000000	455,969220000000	30	34
1108,67335000000	456,171610000000	31	34
1104,82755000000	458,424970000000	32	34
1102,68637000000	463,730850000000	33	34
1097,37805000000	468,731710000000	34	34
1097,50142000000	467,974760000000	35	34
142	1710	1	35
142,992250000000	1707,55438000000	2	35
144,101480000000	1703,85547000000	3	35
143,932390000000	1701,06175000000	4	35
142,060980000000	1696,93903000000	5	35
141,878050000000	1694,85366000000	6	35
142,879260000000	1690,55917000000	7	35
141,780490000000	1683	8	35
138,863820000000	1682,74303000000	9	35
138,663610000000	1683,26576000000	10	35
138,876880000000	1682,10491000000	11	35
138,756960000000	1682,27203000000	12	35
139,935250000000	1681,92161000000	13	35
140,706420000000	1681,11473000000	14	35
141,707320000000	1683,30488000000	15	35
141,792390000000	1682,87399000000	16	35
143,015060000000	1680,81843000000	17	35
141,767830000000	1682,16302000000	18	35
142,404020000000	1682,46026000000	19	35
143,698020000000	1682,62485000000	20	35
143,976370000000	1682,43928000000	21	35
140,926560000000	1680,26912000000	22	35
142,825940000000	1680,54823000000	23	35
141,164210000000	1681,02127000000	24	35
141,878050000000	1680,90244000000	26	35
140,420940000000	1682,14552000000	27	35
141,720250000000	1682,90009000000	28	35
142,592250000000	1681,84850000000	29	35
141,566200000000	1681,96922000000	30	35
142,673350000000	1682,17161000000	31	35
146,827550000000	1683,42497000000	32	35
147,686370000000	1684,73085000000	33	35
925	338	1	36
927,992250000000	331,554380000000	2	36
931,101480000000	329,855470000000	3	36
930,932390000000	328,061750000000	4	36
930,060980000000	326,939030000000	5	36
931,878050000000	326,853660000000	6	36
930,879260000000	327,559170000000	7	36
930,780490000000	327	8	36
929,863820000000	327,743030000000	9	36
929,663610000000	328,265760000000	10	36
929,876880000000	327,104910000000	11	36
927,756960000000	323,272030000000	12	36
926,935250000000	317,921610000000	13	36
931,706420000000	314,114730000000	14	36
935,707320000000	314,304880000000	15	36
936,792390000000	311,873990000000	16	36
940,015060000000	304,818430000000	17	36
939,767830000000	304,163020000000	18	36
938,404020000000	304,460260000000	19	36
939,698020000000	305,624850000000	20	36
940,976370000000	305,439280000000	21	36
944,926560000000	301,269120000000	22	36
941,825940000000	302,548230000000	23	36
941,164210000000	303,021270000000	24	36
947,854560000000	302,756700000000	25	36
954,878050000000	304,902440000000	26	36
955,420940000000	305,145520000000	27	36
962,720250000000	304,900090000000	28	36
969,592250000000	303,848500000000	29	36
976,566200000000	300,969220000000	30	36
984,673350000000	297,171610000000	31	36
2187	1607	1	37
2186,99225000000	1607,55438000000	2	37
2187,10148000000	1607,85547000000	3	37
2185,93239000000	1608,06175000000	4	37
2184,06098000000	1608,93903000000	5	37
2182,87805000000	1609,85366000000	6	37
2181,87926000000	1611,55917000000	7	37
2181,78049000000	1611	8	37
2182,66361000000	1612,26576000000	10	37
2181,87688000000	1612,10491000000	11	37
2182,75696000000	1612,27203000000	12	37
2184,93525000000	1613,92161000000	13	37
2185,70642000000	1614,11473000000	14	37
2185,70732000000	1614,30488000000	15	37
2184,79239000000	1612,87399000000	16	37
2186,01506000000	1613,81843000000	17	37
2185,76783000000	1615,16302000000	18	37
2186,40402000000	1616,46026000000	19	37
2187,69802000000	1617,62485000000	20	37
2187,97637000000	1617,43928000000	21	37
2185,92656000000	1616,26912000000	22	37
2185,82594000000	1616,54823000000	23	37
2186,16421000000	1617,02127000000	24	37
2185,85456000000	1616,75670000000	25	37
2185,87805000000	1616,90244000000	26	37
2185,42094000000	1617,14552000000	27	37
2184,72025000000	1617,90009000000	28	37
2184,59225000000	1616,84850000000	29	37
2180,56620000000	1616,96922000000	30	37
2179,67335000000	1616,17161000000	31	37
2178,82755000000	1616,42497000000	32	37
2177,68637000000	1615,73085000000	33	37
2177,37805000000	1616,73171000000	34	37
2175,50142000000	1616,97476000000	35	37
2173,63931000000	1617,93085000000	36	37
2172,38874000000	1617,30526000000	37	37
922	1875	1	38
923,992250000000	1875,55438000000	2	38
923,101480000000	1874,85547000000	3	38
923,932390000000	1875,06175000000	4	38
924,060980000000	1874,93903000000	5	38
925,878050000000	1875,85366000000	6	38
924,879260000000	1877,55917000000	7	38
924,780490000000	1880	8	38
924,863820000000	1882,74303000000	9	38
923,663610000000	1883,26576000000	10	38
923,876880000000	1883,10491000000	11	38
923,756960000000	1882,27203000000	12	38
923,935250000000	1882,92161000000	13	38
923,706420000000	1882,11473000000	14	38
924,707320000000	1882,30488000000	15	38
926,792390000000	1881,87399000000	16	38
926,015060000000	1882,81843000000	17	38
925,767830000000	1883,16302000000	18	38
925,404020000000	1883,46026000000	19	38
927,698020000000	1883,62485000000	20	38
927,976370000000	1882,43928000000	21	38
926,926560000000	1881,26912000000	22	38
926,825940000000	1881,54823000000	23	38
927,164210000000	1882,02127000000	24	38
926,854560000000	1881,75670000000	25	38
927,878050000000	1881,90244000000	26	38
927,420940000000	1882,14552000000	27	38
926,720250000000	1882,90009000000	28	38
927,592250000000	1881,84850000000	29	38
925,566200000000	1883,96922000000	30	38
927,673350000000	1887,17161000000	31	38
932,827550000000	1886,42497000000	32	38
939,686370000000	1884,73085000000	33	38
946,378050000000	1879,73171000000	34	38
949,501420000000	1877,97476000000	35	38
951,639310000000	1876,93085000000	36	38
958,388740000000	1876,30526000000	37	38
968,300490000000	1876,35732000000	38	38
409	171	1	39
408,992250000000	170,554380000000	2	39
409,101480000000	168,855470000000	3	39
408,932390000000	169,061750000000	4	39
409,060980000000	169,939030000000	5	39
409,878050000000	169,853660000000	6	39
408,879260000000	168,559170000000	7	39
409,780490000000	169	8	39
409,863820000000	170,743030000000	9	39
409,663610000000	171,265760000000	10	39
410,876880000000	170,104910000000	11	39
411,756960000000	170,272030000000	12	39
410,935250000000	171,921610000000	13	39
411,706420000000	171,114730000000	14	39
412,707320000000	172,304880000000	15	39
411,792390000000	171,873990000000	16	39
412,015060000000	170,818430000000	17	39
411,767830000000	171,163020000000	18	39
412,404020000000	171,460260000000	19	39
414,698020000000	172,624850000000	20	39
414,976370000000	171,439280000000	21	39
413,926560000000	169,269120000000	22	39
415,825940000000	169,548230000000	23	39
416,164210000000	170,021270000000	24	39
418,854560000000	171,756700000000	25	39
417,878050000000	171,902440000000	26	39
419,420940000000	173,145520000000	27	39
419,720250000000	172,900090000000	28	39
421,592250000000	172,848500000000	29	39
423,566200000000	173,969220000000	30	39
424,673350000000	172,171610000000	31	39
424,827550000000	172,424970000000	32	39
425,378050000000	172,731710000000	34	39
2374	1299	1	40
2374,99225000000	1299,55438000000	2	40
2375,10148000000	1299,85547000000	3	40
2374,93239000000	1300,06175000000	4	40
2373,06098000000	1299,93903000000	5	40
2371,87805000000	1298,85366000000	6	40
2369,87926000000	1299,55917000000	7	40
2365,78049000000	1300	8	40
2362,86382000000	1299,74303000000	9	40
2360,66361000000	1300,26576000000	10	40
2359,87688000000	1299,10491000000	11	40
2359,75696000000	1301,27203000000	12	40
2358,93525000000	1303,92161000000	13	40
2359,70642000000	1304,11473000000	14	40
2359,70732000000	1306,30488000000	15	40
2355,79239000000	1310,87399000000	16	40
2356,01506000000	1309,81843000000	17	40
2354,76783000000	1311,16302000000	18	40
2355,40402000000	1311,46026000000	19	40
2356,69802000000	1313,62485000000	20	40
2356,97637000000	1315,43928000000	21	40
2356,92656000000	1313,26912000000	22	40
2356,82594000000	1313,54823000000	23	40
2357,16421000000	1314,02127000000	24	40
2357,85456000000	1314,75670000000	25	40
2358,87805000000	1315,90244000000	26	40
2353,42094000000	1316,14552000000	27	40
2350,72025000000	1313,90009000000	28	40
2348,59225000000	1311,84850000000	29	40
2348,56620000000	1309,96922000000	30	40
2347,67335000000	1307,17161000000	31	40
2347,82755000000	1306,42497000000	32	40
2347,68637000000	1304,73085000000	33	40
2348,37805000000	1300,73171000000	34	40
2349,50142000000	1298,97476000000	35	40
66	769	1	41
65,9922500000000	767,554380000000	2	41
65,1014800000000	767,855470000000	3	41
64,9323900000000	769,061750000000	4	41
68,0609800000000	765,939030000000	5	41
68,8780500000000	765,853660000000	6	41
70,8792600000000	767,559170000000	7	41
72,7804900000000	769	8	41
77,8638200000000	772,743030000000	9	41
78,6636100000000	772,265760000000	10	41
77,8768800000000	773,104910000000	11	41
77,7569600000000	774,272030000000	12	41
76,9352500000000	773,921610000000	13	41
76,7064200000000	774,114730000000	14	41
76,7073200000000	774,304880000000	15	41
76,7923900000000	773,873990000000	16	41
80,0150600000000	774,818430000000	17	41
83,7678300000000	776,163020000000	18	41
86,4040200000000	776,460260000000	19	41
89,6980200000000	777,624850000000	20	41
90,9763700000000	778,439280000000	21	41
91,9265600000000	778,269120000000	22	41
92,8259400000000	779,548230000000	23	41
96,1642100000000	781,021270000000	24	41
99,8545600000000	781,756700000000	25	41
104,878050000000	783,902440000000	26	41
107,420940000000	786,145520000000	27	41
111,720250000000	786,900090000000	28	41
116,592250000000	785,848500000000	29	41
121,566200000000	786,969220000000	30	41
124,673350000000	788,171610000000	31	41
128,827550000000	790,424970000000	32	41
133,686370000000	790,730850000000	33	41
134,378050000000	793,731710000000	34	41
136,501420000000	795,974760000000	35	41
139,639310000000	796,930850000000	36	41
143,388740000000	797,305260000000	37	41
148,300490000000	797,357320000000	38	41
1114	1179	1	42
1112,99225000000	1179,55438000000	2	42
1110,10148000000	1180,85547000000	3	42
1108,93239000000	1183,06175000000	4	42
1108,06098000000	1184,93903000000	5	42
1105,87805000000	1186,85366000000	6	42
1100,87926000000	1188,55917000000	7	42
1099,78049000000	1188	8	42
1098,86382000000	1188,74303000000	9	42
1098,66361000000	1189,26576000000	10	42
1097,87688000000	1189,10491000000	11	42
1097,75696000000	1189,27203000000	12	42
1096,93525000000	1190,92161000000	13	42
1096,70642000000	1191,11473000000	14	42
1095,70732000000	1191,30488000000	15	42
1093,79239000000	1186,87399000000	16	42
1092,01506000000	1181,81843000000	17	42
1091,76783000000	1181,16302000000	18	42
1091,40402000000	1181,46026000000	19	42
1092,69802000000	1182,62485000000	20	42
1091,97637000000	1182,43928000000	21	42
1088,92656000000	1177,26912000000	22	42
1086,82594000000	1175,54823000000	23	42
1085,16421000000	1173,02127000000	24	42
1079,85456000000	1172,75670000000	25	42
1079,87805000000	1172,90244000000	26	42
1078,42094000000	1173,14552000000	27	42
1071,72025000000	1171,90009000000	28	42
1068,59225000000	1170,84850000000	29	42
1066,56620000000	1170,96922000000	30	42
1063,67335000000	1172,17161000000	31	42
50	810	1	43
48,9922500000000	810,554380000000	2	43
49,1014800000000	809,855470000000	3	43
48,9323900000000	810,061750000000	4	43
47,0609800000000	809,939030000000	5	43
45,8780500000000	809,853660000000	6	43
45,8792600000000	810,559170000000	7	43
45,7804900000000	809	8	43
45,8638200000000	809,743030000000	9	43
45,6636100000000	810,265760000000	10	43
46,8768800000000	809,104910000000	11	43
45,7569600000000	809,272030000000	12	43
45,9352500000000	809,921610000000	13	43
45,7064200000000	809,114730000000	14	43
46,7073200000000	809,304880000000	15	43
46,7923900000000	807,873990000000	16	43
47,0150600000000	806,818430000000	17	43
46,7678300000000	806,163020000000	18	43
46,4040200000000	805,460260000000	19	43
46,6980200000000	803,624850000000	20	43
46,9763700000000	802,439280000000	21	43
44,9265600000000	801,269120000000	22	43
43,8259400000000	800,548230000000	23	43
42,1642100000000	799,021270000000	24	43
39,8545600000000	799,756700000000	25	43
37,8780500000000	798,902440000000	26	43
36,4209400000000	799,145520000000	27	43
32,7202500000000	799,900090000000	28	43
28,5922500000000	800,848500000000	29	43
25,5662000000000	802,969220000000	30	43
23,6733500000000	804,171610000000	31	43
19,8275500000000	807,424970000000	32	43
18,3780500000000	816,731710000000	34	43
19,5014200000000	819,974760000000	35	43
19,6393100000000	823,930850000000	36	43
1344	1232	1	44
1343,99225000000	1232,55438000000	2	44
1344,10148000000	1233,85547000000	3	44
1344,93239000000	1236,06175000000	4	44
1345,06098000000	1236,93903000000	5	44
1347,87805000000	1239,85366000000	6	44
1347,87926000000	1241,55917000000	7	44
1349,78049000000	1242	8	44
1355,86382000000	1242,74303000000	9	44
1357,66361000000	1242,26576000000	10	44
1361,75696000000	1239,27203000000	12	44
1363,93525000000	1239,92161000000	13	44
1365,70642000000	1237,11473000000	14	44
1367,70732000000	1237,30488000000	15	44
1365,79239000000	1236,87399000000	16	44
1365,01506000000	1237,81843000000	17	44
1364,76783000000	1238,16302000000	18	44
1364,40402000000	1239,46026000000	19	44
1365,69802000000	1241,62485000000	20	44
1365,97637000000	1242,43928000000	21	44
1363,92656000000	1242,26912000000	22	44
1362,82594000000	1244,54823000000	23	44
1362,16421000000	1245,02127000000	24	44
1361,85456000000	1244,75670000000	25	44
1361,87805000000	1243,90244000000	26	44
1362,42094000000	1243,14552000000	27	44
1363,72025000000	1239,90009000000	28	44
1362,59225000000	1237,84850000000	29	44
1361,56620000000	1236,96922000000	30	44
1361,67335000000	1236,17161000000	31	44
1362,82755000000	1236,42497000000	32	44
1362,68637000000	1237,73085000000	33	44
1362,37805000000	1236,73171000000	34	44
2161	490	1	45
2160,99225000000	489,554380000000	2	45
2161,10148000000	487,855470000000	3	45
2161,93239000000	488,061750000000	4	45
2161,06098000000	486,939030000000	5	45
2162,87805000000	484,853660000000	6	45
2164,87926000000	484,559170000000	7	45
2165,78049000000	483	8	45
2164,86382000000	483,743030000000	9	45
2165,66361000000	484,265760000000	10	45
2165,87688000000	482,104910000000	11	45
2165,75696000000	478,272030000000	12	45
2165,93525000000	476,921610000000	13	45
2166,70642000000	476,114730000000	14	45
2166,70732000000	476,304880000000	15	45
2166,79239000000	474,873990000000	16	45
2167,01506000000	474,818430000000	17	45
2166,76783000000	475,163020000000	18	45
2166,40402000000	474,460260000000	19	45
2167,69802000000	474,624850000000	20	45
2165,97637000000	475,439280000000	21	45
2162,92656000000	474,269120000000	22	45
2162,82594000000	474,548230000000	23	45
2160,16421000000	473,021270000000	24	45
2160,85456000000	474,756700000000	25	45
2161,87805000000	473,902440000000	26	45
2161,42094000000	474,145520000000	27	45
2161,72025000000	474,900090000000	28	45
2161,59225000000	473,848500000000	29	45
2160,56620000000	473,969220000000	30	45
2160,67335000000	474,171610000000	31	45
2160,82755000000	473,424970000000	32	45
2161,68637000000	473,730850000000	33	45
2161,37805000000	472,731710000000	34	45
2160,63931000000	472,930850000000	36	45
2161,38874000000	473,305260000000	37	45
2153	859	1	46
2149,99225000000	859,554380000000	2	46
2152,10148000000	858,855470000000	3	46
2153,93239000000	858,061750000000	4	46
2154,06098000000	856,939030000000	5	46
2157,87805000000	855,853660000000	6	46
2160,87926000000	855,559170000000	7	46
2162,78049000000	855	8	46
2162,86382000000	855,743030000000	9	46
2163,66361000000	856,265760000000	10	46
2163,87688000000	853,104910000000	11	46
2162,75696000000	853,272030000000	12	46
2159,93525000000	854,921610000000	13	46
2159,70642000000	856,114730000000	14	46
2158,70732000000	857,304880000000	15	46
2156,79239000000	858,873990000000	16	46
2156,01506000000	858,818430000000	17	46
2155,40402000000	862,460260000000	19	46
2157,69802000000	867,624850000000	20	46
2156,97637000000	869,439280000000	21	46
2155,92656000000	868,269120000000	22	46
2155,82594000000	868,548230000000	23	46
2157,16421000000	868,021270000000	24	46
2155,85456000000	865,756700000000	25	46
2155,87805000000	862,902440000000	26	46
2152,42094000000	863,145520000000	27	46
2148,72025000000	864,900090000000	28	46
2146,59225000000	865,848500000000	29	46
2145,56620000000	866,969220000000	30	46
2146,67335000000	867,171610000000	31	46
2146,82755000000	867,424970000000	32	46
2146,68637000000	870,730850000000	33	46
2147,37805000000	873,731710000000	34	46
2145,50142000000	874,974760000000	35	46
2144,63931000000	876,930850000000	36	46
2143,38874000000	878,305260000000	37	46
1619	1208	1	47
1618,99225000000	1206,55438000000	2	47
1618,10148000000	1203,85547000000	3	47
1618,93239000000	1204,06175000000	4	47
1621,06098000000	1203,93903000000	5	47
1622,87805000000	1203,85366000000	6	47
1622,87926000000	1204,55917000000	7	47
1622,78049000000	1204	8	47
1621,86382000000	1204,74303000000	9	47
1621,66361000000	1204,26576000000	10	47
1622,87688000000	1204,10491000000	11	47
1619,75696000000	1202,27203000000	12	47
1619,93525000000	1203,92161000000	13	47
1619,70642000000	1204,11473000000	14	47
1619,70732000000	1204,30488000000	15	47
1618,79239000000	1203,87399000000	16	47
1618,01506000000	1202,81843000000	17	47
1617,76783000000	1203,16302000000	18	47
1617,40402000000	1203,46026000000	19	47
1618,69802000000	1203,62485000000	20	47
1616,97637000000	1201,43928000000	21	47
1615,92656000000	1200,26912000000	22	47
1613,82594000000	1202,54823000000	23	47
1613,16421000000	1202,02127000000	24	47
1612,85456000000	1202,75670000000	25	47
1612,87805000000	1202,90244000000	26	47
1611,42094000000	1203,14552000000	27	47
1610,72025000000	1201,90009000000	28	47
1610,59225000000	1200,84850000000	29	47
1610,56620000000	1200,96922000000	30	47
1609,67335000000	1200,17161000000	31	47
1609,82755000000	1200,42497000000	32	47
1610,68637000000	1201,73085000000	33	47
1610,37805000000	1200,73171000000	34	47
1608,50142000000	1196,97476000000	35	47
1608,63931000000	1197,93085000000	36	47
1609,30049000000	1199,35732000000	38	47
51	758	1	48
49,9922500000000	758,554380000000	2	48
50,1014800000000	757,855470000000	3	48
51,9323900000000	756,061750000000	4	48
53,0609800000000	755,939030000000	5	48
53,8780500000000	754,853660000000	6	48
53,8792600000000	755,559170000000	7	48
55,7804900000000	755	8	48
54,8638200000000	755,743030000000	9	48
53,6636100000000	756,265760000000	10	48
52,8768800000000	756,104910000000	11	48
51,7569600000000	757,272030000000	12	48
51,9352500000000	757,921610000000	13	48
51,7064200000000	757,114730000000	14	48
50,7073200000000	757,304880000000	15	48
49,7923900000000	756,873990000000	16	48
50,0150600000000	756,818430000000	17	48
49,7678300000000	757,163020000000	18	48
50,4040200000000	758,460260000000	19	48
50,6980200000000	758,624850000000	20	48
49,9763700000000	758,439280000000	21	48
48,9265600000000	757,269120000000	22	48
48,8259400000000	757,548230000000	23	48
49,1642100000000	757,021270000000	24	48
48,8545600000000	757,756700000000	25	48
49,8780500000000	757,902440000000	26	48
49,4209400000000	758,145520000000	27	48
48,7202500000000	758,900090000000	28	48
49,5922500000000	757,848500000000	29	48
49,5662000000000	757,969220000000	30	48
49,6733500000000	757,171610000000	31	48
48,8275500000000	758,424970000000	32	48
48,6863700000000	757,730850000000	33	48
47,3780500000000	757,731710000000	34	48
45,5014200000000	756,974760000000	35	48
43	1161	1	49
42,9922500000000	1162,55438000000	2	49
43,1014800000000	1162,85547000000	3	49
42,9323900000000	1164,06175000000	4	49
43,0609800000000	1163,93903000000	5	49
42,8780500000000	1163,85366000000	6	49
44,8792600000000	1165,55917000000	7	49
41,7804900000000	1164	8	49
39,8638200000000	1164,74303000000	9	49
40,6636100000000	1163,26576000000	10	49
37,8768800000000	1163,10491000000	11	49
37,7569600000000	1162,27203000000	12	49
38,9352500000000	1160,92161000000	13	49
37,7064200000000	1160,11473000000	14	49
39,7073200000000	1160,30488000000	15	49
38,7923900000000	1160,87399000000	16	49
37,0150600000000	1160,81843000000	17	49
36,7678300000000	1162,16302000000	18	49
35,4040200000000	1162,46026000000	19	49
36,6980200000000	1163,62485000000	20	49
36,9763700000000	1163,43928000000	21	49
36,9265600000000	1162,26912000000	22	49
37,8259400000000	1163,54823000000	23	49
35,1642100000000	1163,02127000000	24	49
34,8545600000000	1164,75670000000	25	49
34,8780500000000	1164,90244000000	26	49
33,4209400000000	1166,14552000000	27	49
33,7202500000000	1165,90009000000	28	49
34,5922500000000	1165,84850000000	29	49
34,5662000000000	1165,96922000000	30	49
33,6733500000000	1165,17161000000	31	49
34,8275500000000	1165,42497000000	32	49
35	601	1	50
33,9922500000000	601,554380000000	2	50
34,1014800000000	602,855470000000	3	50
33,9323900000000	603,061750000000	4	50
33,0609800000000	602,939030000000	5	50
34,8780500000000	603,853660000000	6	50
33,8792600000000	604,559170000000	7	50
32,7804900000000	603	8	50
33,8638200000000	602,743030000000	9	50
34,6636100000000	604,265760000000	10	50
34,8768800000000	603,104910000000	11	50
34,7569600000000	603,272030000000	12	50
34,9352500000000	603,921610000000	13	50
34,7064200000000	604,114730000000	14	50
34,7073200000000	604,304880000000	15	50
34,7923900000000	603,873990000000	16	50
35,0150600000000	602,818430000000	17	50
35,7678300000000	603,163020000000	18	50
36,4040200000000	603,460260000000	19	50
38,6980200000000	604,624850000000	20	50
37,9763700000000	604,439280000000	21	50
37,9265600000000	603,269120000000	22	50
37,8259400000000	603,548230000000	23	50
39,1642100000000	603,021270000000	24	50
37,8545600000000	604,756700000000	25	50
37,8780500000000	603,902440000000	26	50
36,4209400000000	604,145520000000	27	50
35,5922500000000	604,848500000000	29	50
35,5662000000000	604,969220000000	30	50
35,6733500000000	604,171610000000	31	50
37,6863700000000	605,730850000000	33	50
38,3780500000000	605,731710000000	34	50
40,5014200000000	604,974760000000	35	50
38,6393100000000	604,930850000000	36	50
39,3887400000000	606,305260000000	37	50
28	1350	1	51
25,9922500000000	1349,55438000000	2	51
26,1014800000000	1348,85547000000	3	51
25,9323900000000	1349,06175000000	4	51
27,0609800000000	1348,93903000000	5	51
28,8780500000000	1348,85366000000	6	51
28,8792600000000	1350,55917000000	7	51
28,7804900000000	1350	8	51
27,8638200000000	1349,74303000000	9	51
26,6636100000000	1350,26576000000	10	51
26,8768800000000	1349,10491000000	11	51
26,7569600000000	1349,27203000000	12	51
26,9352500000000	1349,92161000000	13	51
26,7064200000000	1349,11473000000	14	51
26,7073200000000	1349,30488000000	15	51
26,7923900000000	1348,87399000000	16	51
27,0150600000000	1348,81843000000	17	51
26,7678300000000	1349,16302000000	18	51
26,4040200000000	1349,46026000000	19	51
27,6980200000000	1350,62485000000	20	51
26,9763700000000	1350,43928000000	21	51
25,9265600000000	1349,26912000000	22	51
25,8259400000000	1349,54823000000	23	51
26,1642100000000	1350,02127000000	24	51
25,8545600000000	1350,75670000000	25	51
26,8780500000000	1350,90244000000	26	51
25,4209400000000	1351,14552000000	27	51
25,7202500000000	1351,90009000000	28	51
25,5922500000000	1350,84850000000	29	51
25,5662000000000	1350,96922000000	30	51
25,6733500000000	1351,17161000000	31	51
25,8275500000000	1351,42497000000	32	51
39	771	1	52
38,1014800000000	767,855470000000	3	52
37,9323900000000	768,061750000000	4	52
37,8780500000000	761,853660000000	6	52
35,8792600000000	763,559170000000	7	52
35,7804900000000	765	8	52
36,8638200000000	766,743030000000	9	52
36,6636100000000	766,265760000000	10	52
35,8768800000000	765,104910000000	11	52
36,7569600000000	765,272030000000	12	52
35,9352500000000	765,921610000000	13	52
35,7064200000000	766,114730000000	14	52
35,7073200000000	766,304880000000	15	52
35,7923900000000	765,873990000000	16	52
35,0150600000000	765,818430000000	17	52
34,7678300000000	766,163020000000	18	52
35,4040200000000	766,460260000000	19	52
36,6980200000000	768,624850000000	20	52
36,9763700000000	767,439280000000	21	52
35,9265600000000	766,269120000000	22	52
35,8259400000000	766,548230000000	23	52
35,1642100000000	766,021270000000	24	52
34,8545600000000	766,756700000000	25	52
34,8780500000000	766,902440000000	26	52
34,4209400000000	767,145520000000	27	52
34,7202500000000	767,900090000000	28	52
32,5922500000000	767,848500000000	29	52
31,5662000000000	767,969220000000	30	52
30,6733500000000	768,171610000000	31	52
29,8275500000000	768,424970000000	32	52
28,6863700000000	768,730850000000	33	52
28,3780500000000	769,731710000000	34	52
26,5014200000000	769,974760000000	35	52
25,6393100000000	769,930850000000	36	52
23,3887400000000	771,305260000000	37	52
15	1568	1	53
14,9922500000000	1566,55438000000	2	53
15,1014800000000	1561,85547000000	3	53
14,9323900000000	1561,06175000000	4	53
16,0609800000000	1558,93903000000	5	53
18,8780500000000	1554,85366000000	6	53
19,8792600000000	1552,55917000000	7	53
16,7804900000000	1552	8	53
14,8638200000000	1552,74303000000	9	53
14,6636100000000	1554,26576000000	10	53
14,8768800000000	1554,10491000000	11	53
14,7569600000000	1554,27203000000	12	53
14,9352500000000	1554,92161000000	13	53
13,7064200000000	1557,11473000000	14	53
15,7073200000000	1560,30488000000	15	53
16,7923900000000	1560,87399000000	16	53
16,0150600000000	1560,81843000000	17	53
15,7678300000000	1563,16302000000	18	53
15,4040200000000	1564,46026000000	19	53
17,6980200000000	1567,62485000000	20	53
16,9763700000000	1568,43928000000	21	53
14,9265600000000	1569,26912000000	22	53
14,8259400000000	1571,54823000000	23	53
15,1642100000000	1574,02127000000	24	53
14,8545600000000	1576,75670000000	25	53
14,8780500000000	1578,90244000000	26	53
13,4209400000000	1582,14552000000	27	53
12,7202500000000	1584,90009000000	28	53
11,5922500000000	1587,84850000000	29	53
10,5662000000000	1591,96922000000	30	53
8,67335000000000	1593,17161000000	31	53
6,82755000000000	1594,42497000000	32	53
4,37805000000000	1596,73171000000	34	53
2,50142000000000	1597,97476000000	35	53
1,63931000000000	1599,93085000000	36	53
16	426	1	54
19,9922500000000	426,554380000000	2	54
23,1014800000000	427,855470000000	3	54
26,9323900000000	429,061750000000	4	54
27,0609800000000	427,939030000000	5	54
27,8780500000000	426,853660000000	6	54
27,8792600000000	427,559170000000	7	54
27,7804900000000	427	8	54
26,8638200000000	432,743030000000	9	54
26,6636100000000	432,265760000000	10	54
26,8768800000000	431,104910000000	11	54
27,7569600000000	431,272030000000	12	54
25,9352500000000	429,921610000000	13	54
24,7064200000000	428,114730000000	14	54
24,7073200000000	427,304880000000	15	54
24,7923900000000	426,873990000000	16	54
23,0150600000000	425,818430000000	17	54
21,7678300000000	427,163020000000	18	54
21,4040200000000	427,460260000000	19	54
21,6980200000000	428,624850000000	20	54
19,9763700000000	427,439280000000	21	54
16,9265600000000	426,269120000000	22	54
14,8259400000000	426,548230000000	23	54
13,1642100000000	426,021270000000	24	54
10,8545600000000	425,756700000000	25	54
7,87805000000000	425,902440000000	26	54
6,42094000000000	426,145520000000	27	54
4,72025000000000	425,900090000000	28	54
2,59225000000000	425,848500000000	29	54
0,566200000000002	426,969220000000	30	54
2123	1386	1	55
2131,99225000000	1386,55438000000	2	55
2130,10148000000	1389,85547000000	3	55
2132,93239000000	1386,06175000000	4	55
2130,06098000000	1389,93903000000	5	55
2129,87805000000	1389,85366000000	6	55
2129,87926000000	1389,55917000000	7	55
2129,78049000000	1390	8	55
2129,86382000000	1389,74303000000	9	55
2132,66361000000	1386,26576000000	10	55
2129,87688000000	1389,10491000000	11	55
2129,75696000000	1389,27203000000	12	55
2129,93525000000	1389,92161000000	13	55
2129,70642000000	1390,11473000000	14	55
2132,70732000000	1386,30488000000	15	55
2129,79239000000	1389,87399000000	16	55
2130,01506000000	1389,81843000000	17	55
2129,76783000000	1390,16302000000	18	55
2132,40402000000	1386,46026000000	19	55
2133,69802000000	1387,62485000000	20	55
2130,97637000000	1390,43928000000	21	55
2129,92656000000	1389,26912000000	22	55
2129,82594000000	1389,54823000000	23	55
2130,16421000000	1390,02127000000	24	55
2129,85456000000	1389,75670000000	25	55
2129,87805000000	1389,90244000000	26	55
2132,42094000000	1387,14552000000	27	55
2132,72025000000	1386,90009000000	28	55
2132,59225000000	1386,84850000000	29	55
2132,56620000000	1386,96922000000	30	55
2131,82755000000	1386,42497000000	32	55
2134,68637000000	1382,73085000000	33	55
2134,37805000000	1382,73171000000	34	55
2134,50142000000	1381,97476000000	35	55
2134,63931000000	1381,93085000000	36	55
2134,38874000000	1382,30526000000	37	55
2020,93239000000	1431,06175000000	4	56
2020,06098000000	1430,93903000000	5	56
2019,87805000000	1430,85366000000	6	56
2019,87926000000	1432,55917000000	7	56
2019,78049000000	1433	8	56
2018,86382000000	1433,74303000000	9	56
2019,66361000000	1435,26576000000	10	56
2018,87688000000	1435,10491000000	11	56
2018,75696000000	1436,27203000000	12	56
2018,93525000000	1437,92161000000	13	56
2018,70642000000	1440,11473000000	14	56
2017,70732000000	1443,30488000000	15	56
2018,79239000000	1443,87399000000	16	56
2022,01506000000	1442,81843000000	17	56
2022,76783000000	1443,16302000000	18	56
2023,40402000000	1443,46026000000	19	56
2024,69802000000	1445,62485000000	20	56
2023,97637000000	1444,43928000000	21	56
2023,92656000000	1445,26912000000	22	56
2023,82594000000	1446,54823000000	23	56
2024,16421000000	1446,02127000000	24	56
2024,85456000000	1446,75670000000	25	56
2024,87805000000	1446,90244000000	26	56
2025,42094000000	1446,14552000000	27	56
2026,72025000000	1445,90009000000	28	56
2027,59225000000	1445,84850000000	29	56
2028,56620000000	1445,96922000000	30	56
2028,67335000000	1444,17161000000	31	56
2028,82755000000	1444,42497000000	32	56
2028,68637000000	1443,73085000000	33	56
2029,37805000000	1444,73171000000	34	56
2029,50142000000	1443,97476000000	35	56
2030,63931000000	1444,93085000000	36	56
996,932390000000	240,061750000000	4	57
1000,87805000000	237,853660000000	6	57
1000,87926000000	237,559170000000	7	57
1000,78049000000	236	8	57
999,863820000000	235,743030000000	9	57
1001,66361000000	236,265760000000	10	57
1000,87688000000	236,104910000000	11	57
1001,75696000000	236,272030000000	12	57
1001,93525000000	236,921610000000	13	57
1001,70642000000	237,114730000000	14	57
1002,70732000000	236,304880000000	15	57
1002,79239000000	235,873990000000	16	57
1003,01506000000	234,818430000000	17	57
1002,76783000000	238,163020000000	18	57
1003,40402000000	241,460260000000	19	57
1003,69802000000	242,624850000000	20	57
1001,97637000000	243,439280000000	21	57
1001,92656000000	242,269120000000	22	57
1000,82594000000	242,548230000000	23	57
1001,16421000000	242,021270000000	24	57
998,878050000000	244,902440000000	26	57
998,420940000000	244,145520000000	27	57
998,720250000000	243,900090000000	28	57
999,592250000000	241,848500000000	29	57
999,566200000000	241,969220000000	30	57
1000,67335000000	242,171610000000	31	57
1000,82755000000	242,424970000000	32	57
998,686370000000	243,730850000000	33	57
999,378050000000	242,731710000000	34	57
999,501420000000	242,974760000000	35	57
999,639310000000	242,930850000000	36	57
997,388740000000	248,305260000000	37	57
536	1909	1	58
532,992250000000	1910,55438000000	2	58
531,101480000000	1911,85547000000	3	58
528,932390000000	1912,06175000000	4	58
528,060980000000	1911,93903000000	5	58
527,878050000000	1912,85366000000	6	58
526,879260000000	1914,55917000000	7	58
525,780490000000	1915	8	58
524,863820000000	1916,74303000000	9	58
524,663610000000	1921,26576000000	10	58
524,876880000000	1920,10491000000	11	58
525,756960000000	1921,27203000000	12	58
526,935250000000	1921,92161000000	13	58
527,706420000000	1921,11473000000	14	58
527,707320000000	1920,30488000000	15	58
527,792390000000	1919,87399000000	16	58
528,015060000000	1913,81843000000	17	58
530,767830000000	1909,16302000000	18	58
532,404020000000	1907,46026000000	19	58
534,698020000000	1906,62485000000	20	58
534,976370000000	1904,43928000000	21	58
528,926560000000	1905,26912000000	22	58
526,825940000000	1905,54823000000	23	58
525,164210000000	1906,02127000000	24	58
521,854560000000	1907,75670000000	25	58
518,878050000000	1909,90244000000	26	58
517,420940000000	1911,14552000000	27	58
516,720250000000	1911,90009000000	28	58
515,592250000000	1920,84850000000	29	58
514,566200000000	1925,96922000000	30	58
515,673350000000	1931,17161000000	31	58
519,827550000000	1936,42497000000	32	58
523,686370000000	1941,73085000000	33	58
524,501420000000	1946,97476000000	35	58
526,639310000000	1946,93085000000	36	58
532,388740000000	1948,30526000000	37	58
534,300490000000	1948,35732000000	38	58
535,842350000000	1947,57330000000	39	58
541,518590000000	1947,38589000000	40	58
2257	282	1	59
2257,99225000000	279,554380000000	2	59
2258,10148000000	276,855470000000	3	59
2257,93239000000	275,061750000000	4	59
2259,06098000000	273,939030000000	5	59
2258,87805000000	271,853660000000	6	59
2258,87926000000	272,559170000000	7	59
[truncated: 430,618+ more rows]
