# Supplementary material for: Hypoxia triggers collective aerotactic migration in Dictyostelium discoideum
Source: eLife. 2021 Aug 20;10:e64731. doi: 10.7554/eLife.64731 (PMC8378850; doi:10.7554/eLife.64731)
Supplement: Source data 1. [file elife-64731-data1.xlsx]

## Sheet: Feuil1
Ring speed and density
Experiment#	Measured speed of the ring (micron/min)		density (cells/mm^2)
1	1.07		1500
2	1.25
3	1.1		1900
4	1.647		2100
5	0.73		2000
6	1.02		1875
7	1.24
8	1.48
9	1.05
Mean	1.17633		1875
SD	0.269251		227.761
Cell diffusion
Experiment#	Average cell diffusion (micron^2/min)
1	28.1
2	26.8
3	29.6
Mean	28.1667
SD	1.40119
Cell bias in microfluidic
Experiment#	Average bias ove all cells (microns/min)
1 - 1st gradient	0.697333
1 - 2nd gradient	0.531333
2 - 1st gradient	1.52867
2 - 2nd gradient	0.953333
3 - 1st gradient	1.557
3 - 2nd gradient	1.31633
Mean	1.09733
SD	0.435062
